# Supplementary material for: Comprehensive Analyses of Bone and Cartilage Transcriptomes Evince Ion Transport, Inflammation and Cartilage Development-Related Genes Involved in Chickens’ Femoral Head Separation
Source: MDPI journal article supplement (doi:10.3390/ani12060788), 2022-03-20
Supplement: s1 [file s1]

# **Comprehensive analyses of bone and cartilage transcriptomes evince ion transport, inflammation and cartilage development-related genes involved in chickens' femoral head separation**

Iara Goldoni, Adriana Mércia Guaratini Ibelli, Lana Teixeira Fernandes, Jane de Oliveira Peixoto, Maurício Egídio Cantão, Mônica Corrêa Ledur

## **Additional file S2.**

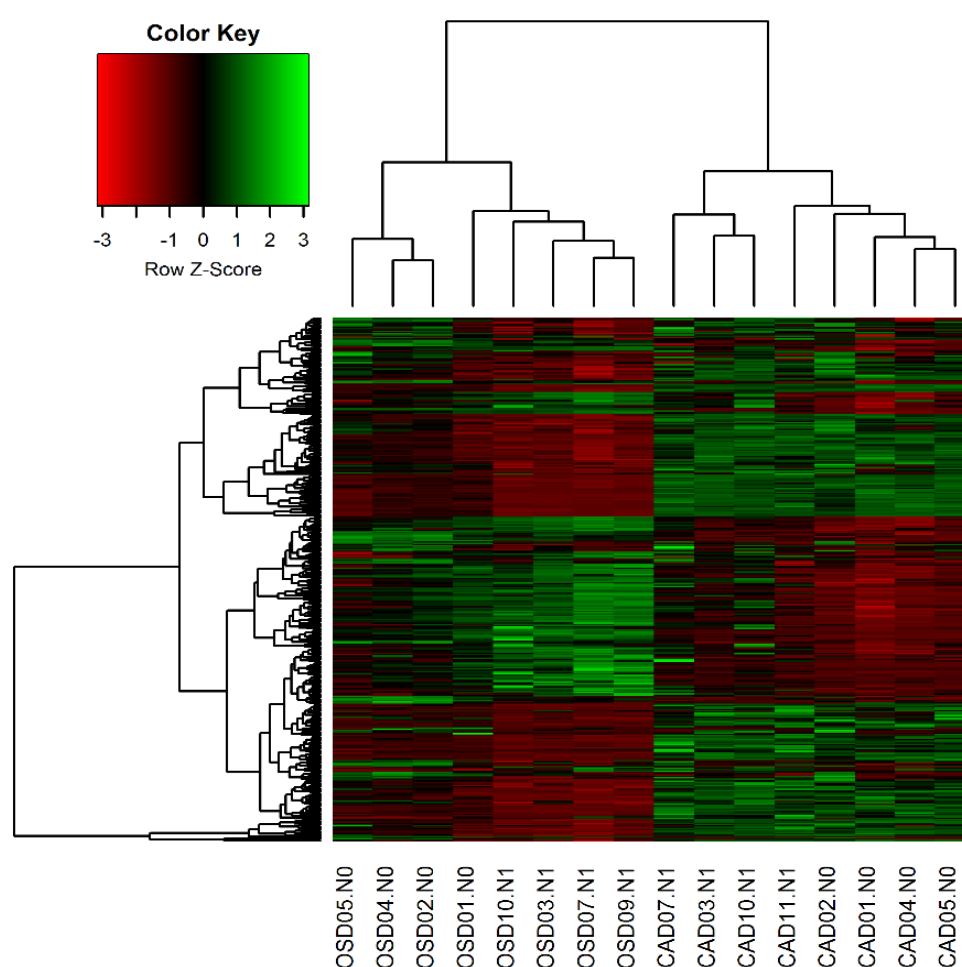

**Fig S1.** Heatmap gene cluster classification for AC and GP normal and FHS-affected samples. In the heatmap, the expression for each gene is presented in the rows and sample is visualized

in the columns, showing a hierarchical clustering of genes and samples. In red, DE genes were downregulated and in green, upregulate in the affected samples.
