# Supplementary material for: Comprehensive Analyses of Bone and Cartilage Transcriptomes Evince Ion Transport, Inflammation and Cartilage Development-Related Genes Involved in Chickens’ Femoral Head Separation
Source: Animals (Basel). 2022 Mar 20;12(6):788. doi: 10.3390/ani12060788 (PMC8944783; doi:10.3390/ani12060788)
Supplement: Supplementary file 1 [file animals-12-00788-s001.zip › Supplementary_file_S1.xlsx]

## Sheet: Table_S1
Table S1. Input paired read numbers, Reads number after quality control and mapping information of each sample.
	Input Read Pairs	Number Input reads	Pairs Read %	N Uniquely Mapped	% Uniquely Mapped
CAD01	28729592	25316657	0.8812	24149239	0.9539
CAD02	25475798	22759789	0.8934	21298050	0.9358
CAD03	26348671	23161401	0.879	22015696	0.9505
CAD04	26695818	23797846	0.8914	22592227	0.9493
CAD05	27348645	22809537	0.834	21749536	0.9535
CAD07	27609412	24367678	0.8826	23008367	0.9442
CAD10	25916653	22857786	0.882	21681460	0.9485
CAD11	26432993	23308706	0.8818	22077744	0.9472
OSD01	13367055	12193450	0.9122	11696807	0.9593
OSD02	21591792	19248971	0.8915	18457497	0.9589
OSD03	19024984	17141644	0.901	16472764	0.961
OSD05	17862286	16106252	0.9017	15413012	0.957
OSD10	18641569	16938798	0.9087	16216967	0.9574
OSD04	12474446	11333543	0.9085	10887219	0.9606
OSD07	15374733	13963957	0.9082	13387001	0.9587
OSD09	12507057	11355991	0.908	10873840	0.9575

## Sheet: Table_S2
Table S2. Expressed and DE genes between normal and FHS-affected broilers with 35 days of age in the AC.
	logFC	logCPM	LR	PValue	FDR	Gene_stable_ID	Gene_ID_version	Gene_name	Gene_description	Chromosome_scaffold_name	Gene_start.bp.	Gene_end_.bp.	Gene_type	Strand	HGNC_symbol	WikiGene_name
ENSGALG00000043254	4.25788	2.6726	52.9772	3.37448e-13	4.11079e-09	ENSGALG00000043254	ENSGALG00000043254.2	EPX	eosinophil peroxidase [Source:NCBI gene;Acc:417467]	19	615901	627255	protein_coding	-1	EPX	EPX
ENSGALG00000022815	3.54634	3.56513	45.0485	1.92219e-11	1.17081e-07	ENSGALG00000022815	ENSGALG00000022815.3	AvBD1	avian beta-defensin 1 [Source:NCBI gene;Acc:395841]	3	107430692	107459717	protein_coding	-1		AvBD1
ENSGALG00000006323	2.87537	4.8857	39.9619	2.58967e-10	9.68425e-07	ENSGALG00000006323	ENSGALG00000006323.7	LECT2	leukocyte cell derived chemotaxin 2 [Source:NCBI gene;Acc:396471]	13	15913091	15918063	protein_coding	1		LECT2
ENSGALG00000016761	3.40688	0.970417	39.5609	3.17986e-10	9.68425e-07	ENSGALG00000016761	ENSGALG00000016761.4	LYG2	lysozyme g2 [Source:NCBI gene;Acc:395708]	1	133828101	133831585	protein_coding	-1		LYG2
ENSGALG00000024272	4.03012	4.60056	37.6843	8.31714e-10	2.02639e-06	ENSGALG00000024272	ENSGALG00000024272.4	S100A12	S100 calcium binding protein A12 [Source:NCBI gene;Acc:426356]	25	3296971	3298411	protein_coding	-1		S100A12
ENSGALG00000034150	3.37576	1.23813	34.746	3.75642e-09	7.62679e-06	ENSGALG00000034150	ENSGALG00000034150.2	CATHL3	cathelicidin-3 [Source:NCBI gene;Acc:100858343]	2	4072545	4073720	protein_coding	1		CATH3
ENSGALG00000019696	3.68752	2.22908	33.914	5.76016e-09	9.58213e-06	ENSGALG00000019696	ENSGALG00000019696.5	CATHL2	cathelicidin antimicrobial peptide [Source:NCBI gene;Acc:420407]	2	4074457	4076222	protein_coding	-1		CAMP
ENSGALG00000052026	2.73591	1.30761	33.742	6.29265e-09	9.58213e-06	ENSGALG00000052026	ENSGALG00000052026.1		serine peptidase inhibitor, Kazal type 2 (acrosin-trypsin inhibitor) [Source:NCBI gene;Acc:770729]	4	49290137	49297530	protein_coding	-1		SPINK2
ENSGALG00000019553	2.72338	3.35475	31.4882	2.00655e-08	2.71597e-05	ENSGALG00000019553	ENSGALG00000019553.4	SERPINB10B	serpin peptidase inhibitor, clade B (ovalbumin), member 10 B [Source:NCBI gene;Acc:395715]	2	67656284	67662678	protein_coding	-1		SERPINB10B
ENSGALG00000003212	3.66372	5.48515	29.3919	5.91229e-08	7.20236e-05	ENSGALG00000003212	ENSGALG00000003212.7	TSPO2	translocator protein 2 [Source:NCBI gene;Acc:419914]	26	4698648	4703751	protein_coding	1	TSPO2	TSPO2
ENSGALG00000047285	3.49781	2.94248	25.5636	4.28043e-07	0.000474038	ENSGALG00000047285	ENSGALG00000047285.1	BD7	avian beta-defensin 7 [Source:NCBI gene;Acc:407777]	3	107443030	107444685	protein_coding	1		AvBD7
ENSGALG00000016669	3.65385	3.31865	24.8076	6.33458e-07	0.000643066	ENSGALG00000016669	ENSGALG00000016669.6	DEFB4A	defensin beta 4A [Source:NCBI gene;Acc:395840]	3	107453344	107455847	protein_coding	1		DEFB4A
ENSGALG00000040279	2.02627	5.28173	24.1101	9.0984e-07	0.00085259	ENSGALG00000040279	ENSGALG00000040279.2	RHCE	Rh blood group CcEe antigens [Source:NCBI gene;Acc:395121]	23	2538276	2544293	protein_coding	1		RHCE
ENSGALG00000014463	4.33522	2.11871	23.8502	1.0413e-06	0.000906077	ENSGALG00000014463	ENSGALG00000014463.7	ACTN2	actinin alpha 2 [Source:NCBI gene;Acc:396263]	3	37710303	37774495	protein_coding	-1		ACTN2
ENSGALG00000032854	1.94802	2.62874	23.4707	1.26831e-06	0.00103004	ENSGALG00000032854	ENSGALG00000032854.2	ACP5	acid phosphatase 5, tartrate resistant [Source:NCBI gene;Acc:107057619]	30	397120	399963	protein_coding	-1	ACP5	ACP5
ENSGALG00000023953	4.05448	3.53295	21.9238	2.83696e-06	0.00215999	ENSGALG00000023953	ENSGALG00000023953.4		complement component 4 binding protein, alpha chain [Source:NCBI gene;Acc:419851]	26	2635048	2641917	protein_coding	1		LOC419851
ENSGALG00000036925	2.80571	3.36614	21.6657	3.24538e-06	0.0023256	ENSGALG00000036925	ENSGALG00000036925.2	CADM3	cell adhesion molecule 3 [Source:NCBI gene;Acc:772356]	25	3840941	3854221	protein_coding	1	CADM3	CADM3
ENSGALG00000008306	3.2156	6.01493	21.0631	4.44402e-06	0.00300761	ENSGALG00000008306	ENSGALG00000008306.5	FGL2	fibrinogen like 2 [Source:NCBI gene;Acc:768821]	1	12915252	12921296	protein_coding	1		FGL2
ENSGALG00000002112	2.27659	4.19421	20.7274	5.2953e-06	0.0031189	ENSGALG00000002112	ENSGALG00000002112.6	CSF3R	colony stimulating factor 3 receptor [Source:NCBI gene;Acc:419620]	23	4160678	4166175	protein_coding	1		CSF3R
ENSGALG00000026518	2.44284	3.47828	20.6753	5.44141e-06	0.0031189	ENSGALG00000026518	ENSGALG00000026518.3	RUNDC3A	RUN domain containing 3A [Source:NCBI gene;Acc:100858314]	27	5408265	5414247	protein_coding	-1	RUNDC3A	RUNDC3A
ENSGALG00000039978	2.70537	7.57567	20.6601	5.48476e-06	0.0031189	ENSGALG00000039978	ENSGALG00000039978.3	SLC4A1	solute carrier family 4 member 1 (Diego blood group) [Source:NCBI gene;Acc:396532]	27	5419090	5434440	protein_coding	1		SLC4A1
ENSGALG00000016285	2.45023	1.03506	20.5956	5.67249e-06	0.0031189	ENSGALG00000016285	ENSGALG00000016285.6		glycerol kinase 2 [Source:NCBI gene;Acc:418589]	1	116059996	116093676	protein_coding	-1		GK2
ENSGALG00000004804	2.39085	1.15654	20.5241	5.88858e-06	0.0031189	ENSGALG00000004804	ENSGALG00000004804.6		transglutaminase 3 [Source:NCBI gene;Acc:419215]	20	6579828	6656826	protein_coding	1		TGM3
ENSGALG00000050327	2.37565	0.434369	20.3836	6.3371e-06	0.0032166	ENSGALG00000050327	ENSGALG00000050327.1		uncharacterized LOC101750509 [Source:NCBI gene;Acc:101750509]	1	127515943	127524655	lncRNA	-1		LOC101750509
ENSGALG00000044661	2.41047	3.48868	20.1155	7.29049e-06	0.00355251	ENSGALG00000044661	ENSGALG00000044661.2		cathepsin G [Source:NCBI gene;Acc:426049]	28	1374946	1377025	protein_coding	-1		CTSG
ENSGALG00000023436	2.35035	0.931842	19.8732	8.2751e-06	0.00382546	ENSGALG00000023436	ENSGALG00000023436.5	HDC	histidine decarboxylase [Source:NCBI gene;Acc:415454]	10	11326310	11335670	protein_coding	1		HDC
ENSGALG00000007447	1.99699	5.91417	19.8268	8.4787e-06	0.00382546	ENSGALG00000007447	ENSGALG00000007447.5	TUBB1	tubulin beta 1 class VI [Source:NCBI gene;Acc:396427]	20	10887341	10892358	protein_coding	-1		TUBB1
ENSGALG00000011190	2.54868	2.29734	19.1771	1.19134e-05	0.00518316	ENSGALG00000011190	ENSGALG00000011190.6		Placenta-specific gene 8-like 2 [Source:NCBI gene;Acc:100857411]	4	46423727	46424857	protein_coding	-1		PLACL2
ENSGALG00000006572	4.05494	3.53504	18.8205	1.43618e-05	0.00584568	ENSGALG00000006572	ENSGALG00000006572.7	TNNT3	troponin T3, fast skeletal type [Source:NCBI gene;Acc:395761]	5	14207186	14237040	protein_coding	-1	TNNT3	TNNT3
ENSGALG00000042105	1.81774	3.46147	18.8159	1.43959e-05	0.00584568	ENSGALG00000042105	ENSGALG00000042105.2	PLCB2	phospholipase C beta 2 [Source:NCBI gene;Acc:423014]	5	887703	923778	protein_coding	-1	PLCB2	PLCB2
ENSGALG00000027165	2.28615	5.06363	18.566	1.64122e-05	0.00644947	ENSGALG00000027165	ENSGALG00000027165.4	RSFR	leukocyte ribonuclease A-2 [Source:NCBI gene;Acc:423668]	6	9958422	9959631	protein_coding	-1		RSFR
ENSGALG00000014585	2.36401	4.0875	18.0605	2.13994e-05	0.00814648	ENSGALG00000014585	ENSGALG00000014585.5		C-C motif chemokine ligand 26 [Source:NCBI gene;Acc:417534]	19	4941785	4942879	protein_coding	1		CCL26
ENSGALG00000021230	2.6914	4.63945	17.995	2.21487e-05	0.00817623	ENSGALG00000021230	ENSGALG00000021230.6	EPB42	erythrocyte membrane protein band 4.2 [Source:NCBI gene;Acc:419216]	20	6698519	6707788	protein_coding	1		EPB42
ENSGALG00000004170	1.71946	4.81483	17.7921	2.46401e-05	0.00882839	ENSGALG00000004170	ENSGALG00000004170.6	ADA	adenosine deaminase [Source:NCBI gene;Acc:419194]	20	5355077	5367709	protein_coding	1		ADA
ENSGALG00000015358	-1.91543	2.61974	17.4334	2.97549e-05	0.0103564	ENSGALG00000015358	ENSGALG00000015358.7	MYH15	myosin, heavy chain 15 [Source:NCBI gene;Acc:395534]	1	88760863	88804642	protein_coding	-1		MYH15
ENSGALG00000016684	2.4344	5.2872	17.2457	3.28443e-05	0.0111141	ENSGALG00000016684	ENSGALG00000016684.6	RHAG	Rh associated glycoprotein [Source:NCBI gene;Acc:395118]	3	108759943	108772090	protein_coding	1		RHAG
ENSGALG00000002397	-1.42912	5.81828	17.19	3.38205e-05	0.0111352	ENSGALG00000002397	ENSGALG00000002397.6	PSPH	phosphoserine phosphatase [Source:NCBI gene;Acc:417540]	19	5020304	5035592	protein_coding	-1		PSPH
ENSGALG00000029857	1.79845	3.45718	17.0893	3.5663e-05	0.0114328	ENSGALG00000029857	ENSGALG00000029857.2		GTPase, IMAP family member 6 [Source:NCBI gene;Acc:420413]	2	4138557	4140735	protein_coding	1		GIMAP6
ENSGALG00000013575	2.87085	5.93442	16.7283	4.3133e-05	0.013473	ENSGALG00000013575	ENSGALG00000013575.4	IFI6	interferon alpha inducible protein 6 [Source:NCBI gene;Acc:403120]	2	89717661	89722211	protein_coding	1		IFI6
ENSGALG00000011086	2.82049	5.56783	16.6718	4.44358e-05	0.0135329	ENSGALG00000011086	ENSGALG00000011086.6	ACTA1	actin alpha 1, skeletal muscle [Source:NCBI gene;Acc:421534]	3	40087452	40090517	protein_coding	-1		ACTA1
ENSGALG00000009479	3.10164	3.90649	16.4487	4.99845e-05	0.0148515	ENSGALG00000009479	ENSGALG00000009479.5		sterile alpha motif domain containing 9 like [Source:NCBI gene;Acc:420559]	2	22911382	22916121	protein_coding	-1		SAMD9L
ENSGALG00000027716	3.3388	4.61971	16.3674	5.21741e-05	0.015133	ENSGALG00000027716	ENSGALG00000027716.3		HPS5, biogenesis of lysosomal organelles complex 2 subunit 2 [Source:NCBI gene;Acc:423079]	5	12686682	12694704	protein_coding	-1		HPS5
ENSGALG00000045846	1.3854	3.32257	16.2702	5.49219e-05	0.0155595	ENSGALG00000045846	ENSGALG00000045846.2	PDK2	pyruvate dehydrogenase (acetyl-transferring) kinase isozyme 2, mitochondrial [Source:NCBI gene;Acc:107050147]	27	5584028	5593719	protein_coding	-1	PDK2	LOC107050147
ENSGALG00000005418	1.18751	4.98743	16.1944	5.71615e-05	0.0158259	ENSGALG00000005418	ENSGALG00000005418.6	FRRS1	ferric chelate reductase 1 [Source:NCBI gene;Acc:429082]	8	12509733	12529822	protein_coding	1	FRRS1	FRRS1
ENSGALG00000000378	1.76832	3.9467	16.0296	6.2359e-05	0.0168813	ENSGALG00000000378	ENSGALG00000000378.6	SLC25A37	solute carrier family 25 (mitochondrial iron transporter), member 37 [Source:NCBI gene;Acc:419530]	22	1324249	1333078	protein_coding	-1	SLC25A37	SLC25A37
ENSGALG00000013414	2.35157	3.69656	15.9414	6.53332e-05	0.0173019	ENSGALG00000013414	ENSGALG00000013414.6	PDLIM3	PDZ and LIM domain 3 [Source:NCBI gene;Acc:414873]	4	61062031	61084516	protein_coding	-1		PDLIM3
ENSGALG00000031177	1.87071	0.559814	15.8705	6.7827e-05	0.0175802	ENSGALG00000031177	ENSGALG00000031177.3			1	85325097	85334170	lncRNA	-1
ENSGALG00000051174	3.53667	3.46634	15.7476	7.23798e-05	0.0176647	ENSGALG00000051174	ENSGALG00000051174.1			KZ626838.1	128412	132260	lncRNA	1
ENSGALG00000045478	2.27611	2.8211	15.6732	7.52819e-05	0.0176647	ENSGALG00000045478	ENSGALG00000045478.2		exocyst complex component 3 like [Source:NCBI gene;Acc:423478]	5	50363371	50382143	protein_coding	-1		EXOC3L
ENSGALG00000030886	3.53107	7.61117	15.6698	7.54174e-05	0.0176647	ENSGALG00000030886	ENSGALG00000030886.2	PTGDS	prostaglandin D2 synthase 21kDa (brain) [Source:NCBI gene;Acc:374110]	17	872551	874786	protein_coding	-1		PTGDS
ENSGALG00000041693	2.81167	3.02709	15.657	7.5933e-05	0.0176647	ENSGALG00000041693	ENSGALG00000041693.3			18	8972420	8974651	lncRNA	-1
ENSGALG00000053964	1.64619	2.07637	15.627	7.71457e-05	0.0176647	ENSGALG00000053964	ENSGALG00000053964.1	GIMAP1-GIMAP5	Gallus gallus GIMAP1-GIMAP5 readthrough (GIMAP1-GIMAP5), mRNA. [Source:RefSeq mRNA;Acc:NM_001369065]	2	511301	514049	protein_coding	1		GIMAP1-GIMAP5
ENSGALG00000003845	1.40058	5.36288	15.6121	7.77542e-05	0.0176647	ENSGALG00000003845	ENSGALG00000003845.6	MKNK2	MAP kinase interacting serine/threonine kinase 2 [Source:NCBI gene;Acc:429269]	28	2220234	2226350	protein_coding	1	MKNK2	MKNK2
ENSGALG00000053676	2.82995	2.08435	15.5988	7.83035e-05	0.0176647	ENSGALG00000053676	ENSGALG00000053676.1			25	3854980	3857110	lncRNA	-1
ENSGALG00000026948	2.1211	3.94722	15.5194	8.16617e-05	0.0177948	ENSGALG00000026948	ENSGALG00000026948.3	ADD2	adducin 2 [Source:NCBI gene;Acc:107054985]	22	4084885	4104541	protein_coding	1	ADD2	ADD2
ENSGALG00000003485	1.08263	4.24782	15.5162	8.18017e-05	0.0177948	ENSGALG00000003485	ENSGALG00000003485.5	CCND3	cyclin D3 [Source:NCBI gene;Acc:419928]	26	5030630	5043220	protein_coding	-1		CCND3
ENSGALG00000036805	2.19004	5.95214	15.4672	8.39513e-05	0.017942	ENSGALG00000036805	ENSGALG00000036805.2		spectrin beta, erythrocytic [Source:NCBI gene;Acc:769410]	5	577103	590550	pseudogene	1		SPTB
ENSGALG00000027765	2.43392	2.8856	15.3403	8.97819e-05	0.0188573	ENSGALG00000027765	ENSGALG00000027765.3		macrophage mannose receptor 1-like [Source:NCBI gene;Acc:771876]	2	19463738	19494337	protein_coding	-1		LOC771876
ENSGALG00000051068	2.38959	2.00643	15.1802	9.77238e-05	0.0201775	ENSGALG00000051068	ENSGALG00000051068.1			4	91264001	91278824	protein_coding	-1
ENSGALG00000005643	3.03927	3.35014	14.9185	0.000112257	0.022554	ENSGALG00000005643	ENSGALG00000005643.5	LYVE1	lymphatic vessel endothelial hyaluronan receptor 1 [Source:NCBI gene;Acc:423038]	5	9149552	9160157	protein_coding	1		LYVE1
ENSGALG00000004418	2.86866	2.46807	14.9071	0.000112936	0.022554	ENSGALG00000004418	ENSGALG00000004418.7	SSTR2	somatostatin receptor 2 [Source:NCBI gene;Acc:395305]	18	8969030	8971311	protein_coding	1		SSTR2
ENSGALG00000040101	2.19398	5.24163	14.8489	0.000116475	0.0227107	ENSGALG00000040101	ENSGALG00000040101.2			16	2272154	2410307	protein_coding	1
ENSGALG00000002907	4.16355	3.56726	14.8332	0.00011745	0.0227107	ENSGALG00000002907	ENSGALG00000002907.7	MYL1	myosin, light chain 1, alkali; skeletal, fast [Source:NCBI gene;Acc:396470]	7	2795396	2813128	protein_coding	-1		MYL1
ENSGALG00000003594	2.11231	6.3068	14.6699	0.000128076	0.023893	ENSGALG00000003594	ENSGALG00000003594.7	ANK1	ankyrin 1 [Source:NCBI gene;Acc:396311]	22	2927488	2974857	protein_coding	-1	ANK1	ANK1
ENSGALG00000014736	1.99732	3.08666	14.6661	0.000128331	0.023893	ENSGALG00000014736	ENSGALG00000014736.6		Kell blood group, metallo-endopeptidase [Source:NCBI gene;Acc:418306]	1	78552909	78576195	protein_coding	1		KEL
ENSGALG00000054766	2.0137	2.03065	14.6498	0.000129448	0.023893	ENSGALG00000054766	ENSGALG00000054766.1	ITGA2B	integrin subunit alpha 2b [Source:NCBI gene;Acc:101749783]	27	3941850	3960190	protein_coding	1	ITGA2B	ITGA2B
ENSGALG00000041988	1.27298	4.22372	14.5263	0.00013822	0.0250432	ENSGALG00000041988	ENSGALG00000041988.3	SIK1	salt inducible kinase 1 [Source:NCBI gene;Acc:395417]	1	111210237	111222987	protein_coding	-1		SIK1
ENSGALG00000043671	-1.24223	3.12493	14.505	0.000139791	0.0250432	ENSGALG00000043671	ENSGALG00000043671.3			16	1391736	1651259	protein_coding	1
ENSGALG00000038902	1.14069	4.70755	14.3898	0.000148604	0.0262361	ENSGALG00000038902	ENSGALG00000038902.2	PIM1	Pim-1 proto-oncogene, serine/threonine kinase [Source:NCBI gene;Acc:100858838]	26	238271	241790	protein_coding	-1	PIM1	PIM1
ENSGALG00000007728	1.20936	4.22776	14.3371	0.000152824	0.0265958	ENSGALG00000007728	ENSGALG00000007728.5		proline dehydrogenase 1 [Source:NCBI gene;Acc:770734]	15	10396499	10406063	protein_coding	-1		PRODH
ENSGALG00000028273	3.74364	3.77201	14.3094	0.000155089	0.0266098	ENSGALG00000028273	ENSGALG00000028273.3	HBE1	hemoglobin subunit epsilon 1 [Source:NCBI gene;Acc:428114]	1	197283325	197284551	protein_coding	-1		HBE1
ENSGALG00000039269	2.06064	6.4285	14.2218	0.00016248	0.0273892	ENSGALG00000039269	ENSGALG00000039269.2	RNF213	ring finger protein 213 [Source:NCBI gene;Acc:422080]	18	9489328	9537525	protein_coding	-1	RNF213	RNF213
ENSGALG00000014835	2.84372	5.88304	14.2028	0.000164129	0.0273892	ENSGALG00000014835	ENSGALG00000014835.6	C7	complement C7 [Source:NCBI gene;Acc:427187]	Z	12908352	12956390	protein_coding	1		C7
ENSGALG00000019384	1.45126	2.39107	14.0821	0.000174999	0.0288086	ENSGALG00000019384	ENSGALG00000019384.5	MAPK12	mitogen-activated protein kinase 12 [Source:NCBI gene;Acc:769763]	1	20526985	20555609	protein_coding	-1	MAPK12	MAPK12
ENSGALG00000006565	-1.50026	4.50827	13.9726	0.000185494	0.0301291	ENSGALG00000006565	ENSGALG00000006565.7		gamma-glutamyltransferase 2 [Source:NCBI gene;Acc:416945]	15	8663295	8688492	protein_coding	-1		GGT2
ENSGALG00000005473	2.2043	2.3788	13.9033	0.000192463	0.0308498	ENSGALG00000005473	ENSGALG00000005473.6	PNAT3	N-acetyltransferase, pineal gland isozyme NAT-3 [Source:NCBI gene;Acc:415809]	11	15783046	15786682	protein_coding	1		PNAT3
ENSGALG00000001558	1.693	4.40338	13.8338	0.00019971	0.0315957	ENSGALG00000001558	ENSGALG00000001558.5	MOV10	Mov10 RISC complex RNA helicase [Source:NCBI gene;Acc:419872]	26	3545026	3550985	pseudogene	1		MOV10
ENSGALG00000000558	2.8844	2.63328	13.807	0.000202578	0.0316386	ENSGALG00000000558	ENSGALG00000000558.6	SLC1A6	solute carrier family 1 (high affinity aspartate/glutamate transporter), member 6 [Source:NCBI gene;Acc:420057]	28	792585	812847	protein_coding	-1	SLC1A6	SLC1A6
ENSGALG00000010870	1.38263	6.85436	13.7518	0.000208621	0.0321698	ENSGALG00000010870	ENSGALG00000010870.7	JUN	Jun proto-oncogene, AP-1 transcription factor subunit [Source:NCBI gene;Acc:424673]	8	26714120	26715827	protein_coding	-1		JUN
ENSGALG00000051148	2.79227	1.92931	13.7004	0.000214404	0.0326456	ENSGALG00000051148	ENSGALG00000051148.1		perilipin-5 [Source:NCBI gene;Acc:426943]	28	2643151	2645374	protein_coding	-1		PLIN5
ENSGALG00000001434	1.40858	2.86314	13.6669	0.000218273	0.0326456	ENSGALG00000001434	ENSGALG00000001434.7	STOM	stomatin [Source:NCBI gene;Acc:417118]	17	8723126	8733376	protein_coding	-1	STOM	STOM
ENSGALG00000012456	1.38452	3.52112	13.6542	0.000219745	0.0326456	ENSGALG00000012456	ENSGALG00000012456.5	RAC2	ras-related C3 botulinum toxin substrate 2 (rho family, small GTP binding protein Rac2) [Source:NCBI gene;Acc:418044]	1	51413962	51423737	protein_coding	1		RAC2
ENSGALG00000037077	2.04036	1.31891	13.6247	0.000223234	0.0327644	ENSGALG00000037077	ENSGALG00000037077.2	CCR5	C-C motif chemokine receptor 5 [Source:NCBI gene;Acc:420695]	2	42617494	42623187	protein_coding	-1		CCR5
ENSGALG00000039480	2.77292	2.27481	13.3815	0.000254124	0.0365698	ENSGALG00000039480	ENSGALG00000039480.2			16	2404886	2405986	protein_coding	1
ENSGALG00000050131	2.99017	3.2256	13.3738	0.000255166	0.0365698	ENSGALG00000050131	ENSGALG00000050131.1		myelin-oligodendrocyte glycoprotein-like [Source:NCBI gene;Acc:112533567]	16	2296187	2298233	protein_coding	1		LOC112533567
ENSGALG00000028357	2.50678	1.88471	13.3464	0.000258924	0.0366769	ENSGALG00000028357	ENSGALG00000028357.3		macrophage mannose receptor 1-like [Source:NCBI gene;Acc:428421]	2	19428947	19462031	protein_coding	-1		LOC428421
ENSGALG00000002192	1.22994	4.25151	13.2745	0.000269037	0.0371156	ENSGALG00000002192	ENSGALG00000002192.7	PTPRC	protein tyrosine phosphatase, receptor type C [Source:NCBI gene;Acc:386580]	8	2418766	2492350	protein_coding	-1		PTPRC
ENSGALG00000004286	-1.29725	3.92052	13.2637	0.000270595	0.0371156	ENSGALG00000004286	ENSGALG00000004286.6	COL13A1	collagen type XIII alpha 1 chain [Source:NCBI gene;Acc:769037]	6	11712568	11751772	protein_coding	1	COL13A1	COL13A1
ENSGALG00000002643	1.65196	2.63211	13.2394	0.000274132	0.0371156	ENSGALG00000002643	ENSGALG00000002643.6			8	4090730	4097363	protein_coding	1
ENSGALG00000014995	2.539	2.39209	13.2388	0.000274208	0.0371156	ENSGALG00000014995	ENSGALG00000014995.6	PGM5	phosphoglucomutase 5 [Source:NCBI gene;Acc:427215]	Z	25517804	25583080	protein_coding	-1	PGM5	PGM5
ENSGALG00000045776	1.77533	2.53242	13.2048	0.000279234	0.0373806	ENSGALG00000045776	ENSGALG00000045776.2	CPN2	carboxypeptidase N subunit 2 [Source:NCBI gene;Acc:424899]	9	13071475	13073741	protein_coding	1	CPN2	CPN2
ENSGALG00000014686	-1.08172	5.50667	13.1712	0.000284291	0.0376439	ENSGALG00000014686	ENSGALG00000014686.6	FBN2	fibrillin 2 [Source:NCBI gene;Acc:374203]	Z	56968843	57129354	protein_coding	-1	FBN2	FBN2
ENSGALG00000030247	2.05636	2.76692	12.8965	0.000329191	0.0429542	ENSGALG00000030247	ENSGALG00000030247.3	TMOD4	tropomodulin 4 [Source:NCBI gene;Acc:395547]	25	253773	258260	protein_coding	-1		TMOD4
ENSGALG00000009552	1.78255	2.59881	12.8654	0.000334716	0.0429542	ENSGALG00000009552	ENSGALG00000009552.6		galectin-related protein-like [Source:NCBI gene;Acc:423277]	5	29151954	29157524	protein_coding	1		LOC423277
ENSGALG00000052196	1.63168	1.94453	12.8548	0.000336623	0.0429542	ENSGALG00000052196	ENSGALG00000052196.1		semaphorin-4A-like [Source:NCBI gene;Acc:112530215]	23	6036756	6053909	protein_coding	1		LOC112530215
ENSGALG00000026092	2.03099	0.764427	12.8379	0.000339672	0.0429542	ENSGALG00000026092	ENSGALG00000026092.3		histamine H3 receptor-like [Source:NCBI gene;Acc:428525]	2	103407604	103415054	protein_coding	1		LOC428525
ENSGALG00000038225	-1.45004	4.11957	12.825	0.000342026	0.0429542	ENSGALG00000038225	ENSGALG00000038225.2	SEMA3E	semaphorin 3E [Source:NCBI gene;Acc:374089]	1	9659444	9790390	protein_coding	1		SEMA3E
ENSGALG00000044326	1.54628	4.81309	12.7562	0.000354832	0.0437583	ENSGALG00000044326	ENSGALG00000044326.2		deleted in malignant brain tumors 1 protein-like [Source:NCBI gene;Acc:426820]	31	4845515	4866801	protein_coding	1		LOC426820
ENSGALG00000054746	1.85193	2.36603	12.7521	0.000355613	0.0437583	ENSGALG00000054746	ENSGALG00000054746.1			18	9173797	9174466	protein_coding	1
ENSGALG00000006889	2.06738	1.24393	12.7279	0.000360249	0.0438855	ENSGALG00000006889	ENSGALG00000006889.6	TMC7	transmembrane channel like 7 [Source:NCBI gene;Acc:416610]	14	8882558	8896929	protein_coding	-1		TMC7
ENSGALG00000016325	1.73668	3.09948	12.6861	0.000368374	0.0444311	ENSGALG00000016325	ENSGALG00000016325.6	GSTA3	glutathione S-transferase alpha 3 [Source:NCBI gene;Acc:414896]	3	88388999	88395707	protein_coding	1		GSTA3
ENSGALG00000052537	1.90396	1.59091	12.6066	0.000384391	0.0459083	ENSGALG00000052537	ENSGALG00000052537.1			8	4097967	4100381	protein_coding	1
ENSGALG00000032239	2.52543	1.87262	12.5343	0.000399559	0.0469622	ENSGALG00000032239	ENSGALG00000032239.2	GCHFR	GTP cyclohydrolase I feedback regulator [Source:NCBI gene;Acc:423003]	5	1225084	1232835	protein_coding	1		GCHFR
ENSGALG00000052853	3.29377	3.13567	12.5279	0.000400925	0.0469622	ENSGALG00000052853	ENSGALG00000052853.1			KZ626838.1	138447	141716	protein_coding	-1
ENSGALG00000045115	1.98764	2.40876	12.4751	0.000412417	0.0478482	ENSGALG00000045115	ENSGALG00000045115.2		Fc fragment of IgE receptor II [Source:NCBI gene;Acc:100858751]	30	595215	599886	protein_coding	1		FCER2
ENSGALG00000006453	3.04672	9.20486	12.4093	0.000427211	0.049097	ENSGALG00000006453	ENSGALG00000006453.7	TF	transferrin (ovotransferrin) [Source:NCBI gene;Acc:396241]	9	4765436	4777129	protein_coding	-1		TF
ENSGALG00000010490	-2.00672	4.71955	12.3533	0.000440215	0.0500006	ENSGALG00000010490	ENSGALG00000010490.8	DPYSL4	dihydropyrimidinase like 4 [Source:NCBI gene;Acc:374022]	6	35825229	35837369	protein_coding	1	DPYSL4	DPYSL4
ENSGALG00000030940	1.39148	6.29872	12.3307	0.000445578	0.0500006	ENSGALG00000030940	ENSGALG00000030940.3	BLB2	Major histocompatibility complex class II beta chain BLB2, (similar to HLA class II, D beta chain) [Source:NCBI gene;Acc:101747454]	16	2572332	2573868	protein_coding	1		BLB2
ENSGALG00000014412	1.47213	3.38336	12.3231	0.000447387	0.0500006	ENSGALG00000014412	ENSGALG00000014412.6	CSTA	cystatin A [Source:NCBI gene;Acc:418268]	1	77439994	77445026	protein_coding	-1	CSTA	CSTA
ENSGALG00000002080	1.39619	2.47191	12.2282	0.000470732	0.0521314	ENSGALG00000002080	ENSGALG00000002080.6	DOCK2	dedicator of cytokinesis 2 [Source:NCBI gene;Acc:427612]	13	4712213	4872139	protein_coding	-1	DOCK2	DOCK2
ENSGALG00000000667	2.05969	1.6937	12.2009	0.000477673	0.0524235	ENSGALG00000000667	ENSGALG00000000667.6	EDN2	endothelin 2 [Source:NCBI gene;Acc:419559]	23	1063330	1068649	protein_coding	1		EDN2
ENSGALG00000045085	2.60423	6.40654	12.1258	0.000497297	0.05409	ENSGALG00000045085	ENSGALG00000045085.2	IFIT5	interferon induced protein with tetratricopeptide repeats 5 [Source:NCBI gene;Acc:423790]	6	20187816	20191669	protein_coding	1		IFIT5
ENSGALG00000000731	1.72197	0.816303	11.9312	0.000552016	0.0595102	ENSGALG00000000731	ENSGALG00000000731.6	THEMIS2	thymocyte selection associated family member 2 [Source:NCBI gene;Acc:419565]	23	1564116	1568510	protein_coding	1	THEMIS2	THEMIS2
ENSGALG00000051554	-1.52322	1.50694	11.8564	0.000574634	0.0614052	ENSGALG00000051554	ENSGALG00000051554.1			6	11674438	11711662	protein_coding	1
ENSGALG00000016400	2.44542	4.21683	11.7907	0.000595285	0.0630588	ENSGALG00000016400	ENSGALG00000016400.5	RSAD2	radical S-adenosyl methionine domain containing 2 [Source:NCBI gene;Acc:428650]	3	94991681	95016338	protein_coding	1		RSAD2
ENSGALG00000015293	-0.969343	5.44738	11.7327	0.00061413	0.0644943	ENSGALG00000015293	ENSGALG00000015293.6	TMEM45A	transmembrane protein 45A [Source:NCBI gene;Acc:418389]	1	86036845	86054389	protein_coding	1		TMEM45A
ENSGALG00000000379	1.00568	4.15056	11.6757	0.00063321	0.0655844	ENSGALG00000000379	ENSGALG00000000379.6	ITGB3	integrin subunit beta 3 [Source:NCBI gene;Acc:374209]	27	4721958	4738989	protein_coding	1		ITGB3
ENSGALG00000015721	1.85059	3.52675	11.6697	0.000635278	0.0655844	ENSGALG00000015721	ENSGALG00000015721.6	SVEP1	complement C3b/C4b receptor 1 (Knops blood group) [Source:NCBI gene;Acc:427338]	Z	66748440	66871680	protein_coding	-1	SVEP1	CR1
ENSGALG00000021972	2.14363	6.07078	11.6506	0.00064181	0.065702	ENSGALG00000021972	ENSGALG00000021972.5	PLIN4	perilipin-4 [Source:NCBI gene;Acc:100857433]	28	2639957	2642578	protein_coding	-1		PLIN4
ENSGALG00000046481	2.56318	2.13313	11.5218	0.000687829	0.0698262	ENSGALG00000046481	ENSGALG00000046481.2		uncharacterized LOC100858941 [Source:NCBI gene;Acc:100858941]	Z	27902995	27923931	lncRNA	1		LOC100858941
ENSGALG00000016483	2.39649	2.10454	11.4877	0.000700595	0.070139	ENSGALG00000016483	ENSGALG00000016483.6		B(0,+)-type amino acid transporter 1-like [Source:NCBI gene;Acc:421965]	3	101650872	101662307	protein_coding	1		LOC421965
ENSGALG00000008060	1.53325	2.67618	11.4828	0.000702426	0.070139	ENSGALG00000008060	ENSGALG00000008060.6	PRKAR2B	protein kinase cAMP-dependent type II regulatory subunit beta [Source:NCBI gene;Acc:769420]	1	14593473	14674699	protein_coding	1	PRKAR2B	PRKAR2B
ENSGALG00000011046	1.13877	3.35805	11.4325	0.000721718	0.0714794	ENSGALG00000011046	ENSGALG00000011046.7	SNX10	sorting nexin 10 [Source:NCBI gene;Acc:420628]	2	32217070	32251177	protein_coding	1		SNX10
ENSGALG00000004290	-1.07836	7.85334	11.3637	0.00074895	0.0735783	ENSGALG00000004290	ENSGALG00000004290.7	ANGPTL1	angiopoietin like 1 [Source:NCBI gene;Acc:770850]	8	6716174	6733176	protein_coding	1		ANGPTL1
ENSGALG00000016986	1.06809	5.14021	11.3127	0.00076978	0.0749023	ENSGALG00000016986	ENSGALG00000016986.4	LCP1	lymphocyte cytosolic protein 1 [Source:NCBI gene;Acc:418852]	1	169350498	169399736	protein_coding	-1		LCP1
ENSGALG00000013723	2.40633	5.83739	11.2876	0.000780265	0.0749023	ENSGALG00000013723	ENSGALG00000013723.6	OASL	2'-5'-oligoadenylate synthetase like [Source:NCBI gene;Acc:395908]	12	3635427	3637460	protein_coding	-1		OASL
ENSGALG00000041491	2.73627	4.2444	11.2862	0.000780873	0.0749023	ENSGALG00000041491	ENSGALG00000041491.3	ACKR4	atypical chemokine receptor 4 [Source:NCBI gene;Acc:100859797]	2	42256779	42262620	protein_coding	1	ACKR4	ACKR4
ENSGALG00000014297	1.25019	4.05102	11.2053	0.000815659	0.0776278	ENSGALG00000014297	ENSGALG00000014297.6	IRF7	interferon regulatory factor 7 [Source:NCBI gene;Acc:396330]	5	16053125	16056590	protein_coding	1		IRF7
ENSGALG00000016590	1.72818	2.61269	11.1843	0.00082492	0.0777754	ENSGALG00000016590	ENSGALG00000016590.7	TLR7	toll like receptor 7 [Source:NCBI gene;Acc:418638]	1	124490191	124497611	protein_coding	1		TLR7
ENSGALG00000034950	-3.413	6.8661	11.173	0.000829978	0.0777754	ENSGALG00000034950	ENSGALG00000034950.2	SMPD3	sphingomyelin phosphodiesterase 3 [Source:NCBI gene;Acc:415619]	11	160633	252673	protein_coding	1	SMPD3	SMPD3
ENSGALG00000033694	1.35722	5.50276	11.1545	0.000838301	0.0779555	ENSGALG00000033694	ENSGALG00000033694.2	IFI30	IFI30, lysosomal thiol reductase [Source:NCBI gene;Acc:420129]	28	4098288	4100719	protein_coding	-1	IFI30	IFI30
ENSGALG00000025945	2.91029	7.13693	11.0947	0.000865767	0.0798998	ENSGALG00000025945	ENSGALG00000025945.3	AVD	avidin [Source:NCBI gene;Acc:396260]	Z	9164659	9166088	protein_coding	1		AVD
ENSGALG00000007114	1.93497	9.57487	11.07	0.000877341	0.0803591	ENSGALG00000007114	ENSGALG00000007114.7	APOA1	apolipoprotein A1 [Source:NCBI gene;Acc:396536]	24	5140181	5141930	protein_coding	-1		APOA1
ENSGALG00000008953	1.41479	3.29394	11.0381	0.000892585	0.0808873	ENSGALG00000008953	ENSGALG00000008953.5	AASS	aminoadipate-semialdehyde synthase [Source:NCBI gene;Acc:417757]	1	23009937	23038493	protein_coding	1	AASS	AASS
ENSGALG00000007780	1.3245	4.27833	11.0302	0.000896387	0.0808873	ENSGALG00000007780	ENSGALG00000007780.6	EIF4E3	eukaryotic translation initiation factor 4E family member 3 [Source:NCBI gene;Acc:416093]	12	16666749	16682429	protein_coding	-1	EIF4E3	EIF4E3
ENSGALG00000012791	1.56069	2.15857	11.0156	0.000903475	0.0809275	ENSGALG00000012791	ENSGALG00000012791.6	TBXAS1	thromboxane A synthase 1 [Source:NCBI gene;Acc:418101]	1	55750244	55990181	protein_coding	-1	TBXAS1	TBXAS1
ENSGALG00000042134	-1.24902	6.4462	10.9766	0.000922698	0.082046	ENSGALG00000042134	ENSGALG00000042134.2	PIEZO2	piezo type mechanosensitive ion channel component 2 [Source:NCBI gene;Acc:421052]	2	97729887	98023150	protein_coding	1	PIEZO2	PIEZO2
ENSGALG00000006724	-0.81185	5.39446	10.8986	0.000962368	0.0839797	ENSGALG00000006724	ENSGALG00000006724.6		glypican 2 [Source:NCBI gene;Acc:429143]	9	3145813	3521172	protein_coding	-1		GPC2
ENSGALG00000042551	1.40461	2.29104	10.8945	0.00096448	0.0839797	ENSGALG00000042551	ENSGALG00000042551.3		pleckstrin and Sec7 domain containing [Source:NCBI gene;Acc:423760]	6	17777177	17804920	pseudogene	-1		PSD
ENSGALG00000009639	2.59824	1.98025	10.8897	0.000967019	0.0839797	ENSGALG00000009639	ENSGALG00000009639.6	DDX60	DExD/H-box helicase 60 [Source:NCBI gene;Acc:422427]	4	24959132	24997825	protein_coding	-1	DDX60	DDX60
ENSGALG00000014561	1.11232	4.30818	10.8801	0.00097202	0.0839797	ENSGALG00000014561	ENSGALG00000014561.7	PTPN6	protein tyrosine phosphatase, non-receptor type 6 [Source:NCBI gene;Acc:427947]	1	77994636	78014698	protein_coding	1		PTPN6
ENSGALG00000026055	1.26848	3.90845	10.8495	0.000988225	0.0847786	ENSGALG00000026055	ENSGALG00000026055.4	PALM	paralemmin [Source:NCBI gene;Acc:101750199]	28	2849820	2864572	protein_coding	1		PALM
ENSGALG00000040832	1.62512	4.90044	10.8337	0.00099671	0.0849085	ENSGALG00000040832	ENSGALG00000040832.2	CFD	complement factor D [Source:NCBI gene;Acc:100857593]	28	2928051	2932763	protein_coding	1	CFD	CFD
ENSGALG00000040573	2.85458	3.46621	10.764	0.00103494	0.0875534	ENSGALG00000040573	ENSGALG00000040573.2	FMO3	flavin containing monooxygenase 3 [Source:NCBI gene;Acc:395267]	8	5192817	5199230	protein_coding	-1		FMO3
ENSGALG00000014603	1.93677	6.42292	10.7036	0.00106928	0.0898343	ENSGALG00000014603	ENSGALG00000014603.5	C1S	complement C1s [Source:NCBI gene;Acc:418294]	1	78045961	78055022	protein_coding	1		C1S
ENSGALG00000017926	-1.60746	2.90363	10.6895	0.00107747	0.0899025	ENSGALG00000017926	ENSGALG00000017926.2	7SK	7SK RNA [Source:RFAM;Acc:RF00100]	3	88359209	88359537	misc_RNA	-1
ENSGALG00000004859	1.61335	5.62532	10.6014	0.00113	0.0936443	ENSGALG00000004859	ENSGALG00000004859.6	ZNFX1	zinc finger NFX1-type containing 1 [Source:NCBI gene;Acc:419218]	20	6715285	6727531	protein_coding	-1	ZNFX1	ZNFX1
ENSGALG00000049448	2.95278	3.74267	10.5714	0.00114848	0.0945322	ENSGALG00000049448	ENSGALG00000049448.1			16	2302998	2422327	protein_coding	1
ENSGALG00000013624	1.25796	2.39508	10.5128	0.00118553	0.0956445	ENSGALG00000013624	ENSGALG00000013624.6		family with sequence similarity 65, member B [Source:NCBI gene;Acc:421003]	2	90145304	90201328	protein_coding	1		FAM65B
ENSGALG00000006138	1.99257	4.37342	10.4992	0.00119427	0.0956445	ENSGALG00000006138	ENSGALG00000006138.6	HELZ2	helicase with zinc finger 2 [Source:NCBI gene;Acc:419265]	20	9732482	9752786	protein_coding	1	HELZ2	HELZ2
ENSGALG00000012658	0.80988	5.90521	10.487	0.00120215	0.0956445	ENSGALG00000012658	ENSGALG00000012658.7	TCP11X2	t-complex 11 family, X-linked 2 [Source:NCBI gene;Acc:425052]	1	53881515	53897895	protein_coding	-1		TCP11X2
ENSGALG00000030661	1.3309	4.91624	10.4845	0.0012038	0.0956445	ENSGALG00000030661	ENSGALG00000030661.2	STAT2	signal transducer and activator of transcription 2 [Source:NCBI gene;Acc:100858732]	33	6934615	6940207	protein_coding	1	STAT2	STAT2
ENSGALG00000005850	1.20541	4.87475	10.4797	0.00120694	0.0956445	ENSGALG00000005850	ENSGALG00000005850.6	FNBP1L	formin binding protein 1 like [Source:NCBI gene;Acc:424495]	8	14265560	14318955	protein_coding	-1	FNBP1L	FNBP1L
ENSGALG00000020316	-1.12362	4.60154	10.4764	0.0012091	0.0956445	ENSGALG00000020316	ENSGALG00000020316.6	IL13RA2	interleukin 13 receptor subunit alpha 2 [Source:NCBI gene;Acc:422219]	4	2834589	2850667	protein_coding	-1		IL13RA2
ENSGALG00000043257	1.45413	1.9057	10.4484	0.00122758	0.0964797	ENSGALG00000043257	ENSGALG00000043257.3		lysozyme g-like [Source:NCBI gene;Acc:418700]	1	133819265	133823382	protein_coding	-1		LYGL
ENSGALG00000005638	1.15035	4.03954	10.4235	0.00124422	0.0967099	ENSGALG00000005638	ENSGALG00000005638.6	IL2RG	interleukin 2 receptor subunit gamma [Source:NCBI gene;Acc:395199]	4	2390550	2394261	protein_coding	1		IL2RG
ENSGALG00000022871	-1.04632	5.98383	10.4203	0.00124638	0.0967099	ENSGALG00000022871	ENSGALG00000022871.5	HHLA2	HERV-H LTR-associating 2 [Source:NCBI gene;Acc:107054979]	1	88748622	88761403	protein_coding	1	HHLA2	HHLA2
ENSGALG00000042077	1.30525	4.58145	10.3957	0.00126306	0.0973837	ENSGALG00000042077	ENSGALG00000042077.2	HIC1	HIC ZBTB transcriptional repressor 1 [Source:NCBI gene;Acc:396164]	19	5668833	5673549	protein_coding	1		HIC1
ENSGALG00000051897	1.56898	0.818198	10.3202	0.0013158	0.100025	ENSGALG00000051897	ENSGALG00000051897.1			13	9306761	9322949	pseudogene	1
ENSGALG00000041380	1.34987	9.18103	10.3162	0.00131867	0.100025	ENSGALG00000041380	ENSGALG00000041380.3	BF2	Major histocompatibility complex class I antigen BF2 [Source:NCBI gene;Acc:425389]	16	2606528	2609057	protein_coding	-1		BF2
ENSGALG00000013086	1.45118	1.72175	10.3116	0.00132195	0.100025	ENSGALG00000013086	ENSGALG00000013086.6	IKZF1	IKAROS family zinc finger 1 [Source:NCBI gene;Acc:395974]	2	80659236	80730292	protein_coding	1		IKZF1
ENSGALG00000043041	2.32321	4.78303	10.2885	0.00133862	0.100179	ENSGALG00000043041	ENSGALG00000043041.2	NRN1	neuritin 1 [Source:NCBI gene;Acc:420873]	2	65116070	65122819	protein_coding	1		NRN1
ENSGALG00000053513	1.44549	1.04084	10.286	0.00134044	0.100179	ENSGALG00000053513	ENSGALG00000053513.1			14	6596941	6598979	lncRNA	-1
ENSGALG00000052514	1.49527	4.95782	10.2645	0.00135613	0.100314	ENSGALG00000052514	ENSGALG00000052514.1		early endosome antigen 1-like [Source:NCBI gene;Acc:107055361]	28	3535041	3536298	lncRNA	-1		LOC107055361
ENSGALG00000049024	1.57443	0.89805	10.261	0.00135871	0.100314	ENSGALG00000049024	ENSGALG00000049024.1	CD7	CD7 molecule [Source:NCBI gene;Acc:417346]	18	3703058	3711715	protein_coding	1		CD7
ENSGALG00000053107	2.31128	3.85441	10.2247	0.00138573	0.101693	ENSGALG00000053107	ENSGALG00000053107.1			3	58190054	58231715	protein_coding	-1
ENSGALG00000044841	1.40114	3.40578	10.1816	0.00141846	0.102882	ENSGALG00000044841	ENSGALG00000044841.2		tapasin-related protein-like [Source:NCBI gene;Acc:100857331]	19	9717099	9722490	protein_coding	-1		LOC100857331
ENSGALG00000003695	-2.1115	4.91586	10.1812	0.00141883	0.102882	ENSGALG00000003695	ENSGALG00000003695.6	MINPP1	multiple inositol-polyphosphate phosphatase 1 [Source:NCBI gene;Acc:395356]	6	10338413	10355225	protein_coding	-1		MINPP1
ENSGALG00000014569	1.50553	4.12216	10.161	0.00143445	0.103129	ENSGALG00000014569	ENSGALG00000014569.5	PNPLA2	patatin like phospholipase domain containing 2 [Source:NCBI gene;Acc:431066]	5	15965565	15987045	protein_coding	-1		PNPLA2
ENSGALG00000015877	1.90201	1.92013	10.1549	0.00143916	0.103129	ENSGALG00000015877	ENSGALG00000015877.7	SH3BGRL2	SH3 domain binding glutamate rich protein like 2 [Source:HGNC Symbol;Acc:HGNC:15567]	3	79346708	79364073	protein_coding	-1	SH3BGRL2
ENSGALG00000013101	2.27714	5.54519	10.1196	0.00146698	0.104507	ENSGALG00000013101	ENSGALG00000013101.7			16	2276258	2395893	protein_coding	1
ENSGALG00000000775	1.24583	6.03845	10.0939	0.00148764	0.105363	ENSGALG00000000775	ENSGALG00000000775.6	CTSS	cathepsin S [Source:NCBI gene;Acc:425657]	25	165228	169865	protein_coding	-1		CTSS
ENSGALG00000020479	1.35786	5.17048	10.0707	0.0015065	0.105418	ENSGALG00000020479	ENSGALG00000020479.5	SLC43A3	solute carrier family 43 member 3 [Source:NCBI gene;Acc:423133]	5	17269101	17278700	protein_coding	1	SLC43A3	SLC43A3
ENSGALG00000006344	1.98516	2.98254	10.0666	0.00150977	0.105418	ENSGALG00000006344	ENSGALG00000006344.6	GSTT1	glutathione S-transferase theta 1 [Source:NCBI gene;Acc:396322]	15	8395951	8406821	protein_coding	1		GSTT1
ENSGALG00000001571	1.17505	3.65989	10.061	0.00151437	0.105418	ENSGALG00000001571	ENSGALG00000001571.5	MYO1F	myosin IF [Source:NCBI gene;Acc:396187]	28	1844413	1858231	protein_coding	-1		MYO1F
ENSGALG00000012712	1.35459	3.40665	10.0402	0.00153161	0.106012	ENSGALG00000012712	ENSGALG00000012712.5	RBM24	RNA binding motif protein 24 [Source:NCBI gene;Acc:420846]	2	61921863	61932480	protein_coding	1		RBM24
ENSGALG00000051458	1.23847	2.34677	10.0061	0.00156021	0.107381	ENSGALG00000051458	ENSGALG00000051458.1			33	6319041	6321636	protein_coding	-1
ENSGALG00000011798	0.811203	5.9891	9.96971	0.00159136	0.10891	ENSGALG00000011798	ENSGALG00000011798.4	HEBP1	heme binding protein 1 [Source:NCBI gene;Acc:417961]	1	48243645	48250223	protein_coding	-1		HEBP1
ENSGALG00000026422	1.65939	4.77559	9.95422	0.00160481	0.109217	ENSGALG00000026422	ENSGALG00000026422.3		poly(ADP-ribose) polymerase family member 14 [Source:NCBI gene;Acc:101747378]	7	28217915	28235171	protein_coding	-1		PARP14
ENSGALG00000008408	1.32536	1.58454	9.93182	0.00162446	0.10994	ENSGALG00000008408	ENSGALG00000008408.7	GAB3	GRB2 associated binding protein 3 [Source:NCBI gene;Acc:428717]	4	14256173	14306628	protein_coding	-1	GAB3	GAB3
ENSGALG00000044935	2.53054	4.33067	9.79373	0.00175108	0.117855	ENSGALG00000044935	ENSGALG00000044935.2			2	417866	419527	protein_coding	1
ENSGALG00000021143	1.25962	3.57247	9.76567	0.00177801	0.118915	ENSGALG00000021143	ENSGALG00000021143.5	RGS18	regulator of G-protein signaling 18 [Source:NCBI gene;Acc:424361]	8	4037595	4046218	protein_coding	-1		RGS18
ENSGALG00000002988	-1.10235	3.65857	9.75705	0.00178636	0.118915	ENSGALG00000002988	ENSGALG00000002988.7		phosphoglycerate dehydrogenase [Source:NCBI gene;Acc:424381]	8	4633303	4636689	pseudogene	-1		PHGDH
ENSGALG00000030647	-0.998815	6.34047	9.71298	0.00182971	0.120041	ENSGALG00000030647	ENSGALG00000030647.2	MFAP2	microfibril associated protein 2 [Source:HGNC Symbol;Acc:HGNC:7033]	21	4415210	4419343	protein_coding	-1	MFAP2
ENSGALG00000041192	1.39123	4.69711	9.70697	0.0018357	0.120041	ENSGALG00000041192	ENSGALG00000041192.2	IFIH1	interferon induced with helicase C domain 1 [Source:NCBI gene;Acc:424185]	7	21044187	21071090	protein_coding	1		IFIH1
ENSGALG00000000560	2.42515	2.73507	9.6925	0.00185021	0.120041	ENSGALG00000000560	ENSGALG00000000560.6		peptidase inhibitor 16 [Source:NCBI gene;Acc:419818]	26	1639626	1646179	protein_coding	1		PI16
ENSGALG00000051041	1.44869	1.56144	9.69104	0.00185168	0.120041	ENSGALG00000051041	ENSGALG00000051041.1			33	7729329	7735343	protein_coding	-1
ENSGALG00000003078	1.11337	5.44862	9.69018	0.00185255	0.120041	ENSGALG00000003078	ENSGALG00000003078.7	MMD	monocyte to macrophage differentiation associated [Source:NCBI gene;Acc:417397]	18	5945780	5973025	protein_coding	-1		MMD
ENSGALG00000012761	1.52919	2.26671	9.66964	0.00187338	0.120749	ENSGALG00000012761	ENSGALG00000012761.6	DRAM1	DNA damage regulated autophagy modulator 1 [Source:NCBI gene;Acc:418095]	1	55492486	55507806	protein_coding	-1	DRAM1	DRAM1
ENSGALG00000042863	-1.00315	5.22935	9.65959	0.00188366	0.120772	ENSGALG00000042863	ENSGALG00000042863.3	SMIM4	small integral membrane protein 4 [Source:NCBI gene;Acc:415896]	12	1100608	1101574	protein_coding	1		SMIM4
ENSGALG00000031597	2.36556	10.4213	9.59033	0.00195605	0.123797	ENSGALG00000031597	ENSGALG00000031597.3	HBAD	hemoglobin alpha, subunit D [Source:NCBI gene;Acc:416651]	14	12507333	12508287	protein_coding	1		HBAD
ENSGALG00000029892	1.10283	5.41853	9.58762	0.00195893	0.123797	ENSGALG00000029892	ENSGALG00000029892.2	LMO2	LIM domain only 2 [Source:NCBI gene;Acc:374129]	5	18658103	18665579	protein_coding	-1	LMO2	LMO2
ENSGALG00000009493	0.92569	3.34393	9.57478	0.00197269	0.123797	ENSGALG00000009493	ENSGALG00000009493.5	TMEM229B	transmembrane protein 229B [Source:NCBI gene;Acc:423269]	5	28959000	28968965	protein_coding	-1		TMEM229B
ENSGALG00000008127	1.29572	4.55342	9.56924	0.00197865	0.123797	ENSGALG00000008127	ENSGALG00000008127.6	SPI1	Spi-1 proto-oncogene [Source:NCBI gene;Acc:395879]	5	23185094	23206765	protein_coding	1		SPI1
ENSGALG00000000720	1.52306	5.84862	9.56645	0.00198165	0.123797	ENSGALG00000000720	ENSGALG00000000720.6		guanylate binding protein 1 [Source:NCBI gene;Acc:419563]	23	1516302	1523141	protein_coding	1		GBP1
ENSGALG00000005022	1.7612	1.99775	9.55552	0.00199349	0.123902	ENSGALG00000005022	ENSGALG00000005022.5	GP9	glycoprotein IX platelet [Source:HGNC Symbol;Acc:HGNC:4444]	12	5515883	5519044	protein_coding	-1	GP9
ENSGALG00000035075	1.40175	4.37169	9.49893	0.00205591	0.126938	ENSGALG00000035075	ENSGALG00000035075.3	TAP1	transporter 1, ATP-binding cassette, sub-family B (MDR/TAP) [Source:NCBI gene;Acc:427727]	16	2596216	2601012	pseudogene	-1		TAP1
ENSGALG00000025881	1.69546	1.12924	9.49245	0.00206319	0.126938	ENSGALG00000025881	ENSGALG00000025881.3		colony stimulating factor 2 receptor beta common subunit [Source:NCBI gene;Acc:101750812]	1	51541954	51569755	protein_coding	-1		CSF2RB
ENSGALG00000050441	1.3309	2.60603	9.43138	0.00213303	0.130576	ENSGALG00000050441	ENSGALG00000050441.1		cytokine receptor common subunit beta-like [Source:NCBI gene;Acc:771315]	1	51558852	51565932	protein_coding	-1		CRCBL
ENSGALG00000010098	-0.850583	5.15506	9.41612	0.00215086	0.131009	ENSGALG00000010098	ENSGALG00000010098.5	SLC6A9	solute carrier family 6 member 9 [Source:NCBI gene;Acc:424576]	8	20733964	20748606	protein_coding	-1		SLC6A9
ENSGALG00000043610	1.97612	2.32152	9.39379	0.00217722	0.131955	ENSGALG00000043610	ENSGALG00000043610.2		alpha-tectorin-like [Source:NCBI gene;Acc:100857892]	KZ626838.1	144669	159138	protein_coding	-1		LOC100857892
ENSGALG00000054971	1.3322	2.77906	9.37589	0.00219858	0.132223	ENSGALG00000054971	ENSGALG00000054971.1		rho GTPase-activating protein 30-like [Source:NCBI gene;Acc:101749378]	25	20565	29413	protein_coding	-1		LOC101749378
ENSGALG00000012119	1.06068	3.55569	9.37191	0.00220335	0.132223	ENSGALG00000012119	ENSGALG00000012119.6	MARCO	macrophage receptor with collagenous structure [Source:NCBI gene;Acc:395488]	7	28482051	28491954	protein_coding	-1		MARCO
ENSGALG00000031978	1.39822	1.53038	9.35005	0.0022298	0.132675	ENSGALG00000031978	ENSGALG00000031978.3	TARP	TCR gamma alternate reading frame protein [Source:NCBI gene;Acc:776306]	2	49030132	49126360	protein_coding	-1		TARP
ENSGALG00000047283	1.36757	4.19512	9.34768	0.00223267	0.132675	ENSGALG00000047283	ENSGALG00000047283.1		deleted in malignant brain tumors 1 [Source:NCBI gene;Acc:426819]	31	4827950	4839801	protein_coding	1		DMBT1
ENSGALG00000047208	1.27056	5.03775	9.31677	0.00227066	0.134278	ENSGALG00000047208	ENSGALG00000047208.1		Kruppel-like factor 1 (erythroid) [Source:NCBI gene;Acc:424577]	8	20767812	20771114	protein_coding	1		KLF-4
ENSGALG00000012072	1.60774	6.14876	9.29024	0.00230378	0.135578	ENSGALG00000012072	ENSGALG00000012072.7		poly(ADP-ribose) polymerase family member 14 [Source:NCBI gene;Acc:101747378]	7	28237978	28253588	protein_coding	-1		PARP14
ENSGALG00000035386	1.08606	3.1246	9.26859	0.00233117	0.136531	ENSGALG00000035386	ENSGALG00000035386.3	NCKAP1L	NCK associated protein 1 like [Source:NCBI gene;Acc:425499]	33	6036926	6046319	protein_coding	-1		NCKAP1L
ENSGALG00000009562	-1.39523	2.09978	9.23765	0.00237088	0.137411	ENSGALG00000009562	ENSGALG00000009562.6	PLEK2	pleckstrin 2 [Source:NCBI gene;Acc:423278]	5	29157311	29169648	protein_coding	-1		PLEK2
ENSGALG00000011350	2.09093	2.42333	9.22989	0.00238096	0.137411	ENSGALG00000011350	ENSGALG00000011350.7	NEGR1	neuronal growth regulator 1 [Source:NCBI gene;Acc:395662]	8	29514747	29680796	protein_coding	-1		NEGR1
ENSGALG00000037603	1.18777	4.65664	9.22116	0.00239233	0.137411	ENSGALG00000037603	ENSGALG00000037603.3	SESN2	sestrin-2-like [Source:NCBI gene;Acc:100858796]	23	2253610	2261049	protein_coding	1	SESN2	LOC100858796
ENSGALG00000010244	-0.862258	7.03401	9.21689	0.00239792	0.137411	ENSGALG00000010244	ENSGALG00000010244.7	AKR1A1	aldo-keto reductase family 1 member A1 [Source:NCBI gene;Acc:424599]	8	21508992	21528082	protein_coding	1		AKR1A1
ENSGALG00000017790	-2.6246	3.46582	9.2071	0.00241078	0.137411	ENSGALG00000017790	ENSGALG00000017790.2	5S_rRNA	5S ribosomal RNA [Source:RFAM;Acc:RF00001]	2	44413238	44413356	rRNA	-1		LOC112531980
ENSGALG00000001459	1.65958	1.4284	9.18894	0.00243482	0.137411	ENSGALG00000001459	ENSGALG00000001459.6	TNNC1	troponin C1, slow skeletal and cardiac type [Source:NCBI gene;Acc:396032]	12	970285	981315	protein_coding	-1		TNNC1
ENSGALG00000030038	0.968431	5.08494	9.18872	0.00243511	0.137411	ENSGALG00000030038	ENSGALG00000030038.2	C3	complement component 3 [Source:NCBI gene;Acc:396370]	30	491364	674579	protein_coding	1		C3
ENSGALG00000021656	1.46317	0.67566	9.18772	0.00243644	0.137411	ENSGALG00000021656	ENSGALG00000021656.6	PTPN22	protein tyrosine phosphatase, non-receptor type 22 [Source:NCBI gene;Acc:772032]	26	3746839	3760199	protein_coding	-1	PTPN22	PTPN22
ENSGALG00000004777	-0.919787	5.41269	9.16687	0.00246435	0.138344	ENSGALG00000004777	ENSGALG00000004777.6	AIFM2	apoptosis inducing factor, mitochondria associated 2 [Source:NCBI gene;Acc:423720]	6	12694308	12699133	protein_coding	1	AIFM2	AIFM2
ENSGALG00000016142	2.7292	3.84835	9.13876	0.00250251	0.139545	ENSGALG00000016142	ENSGALG00000016142.7	MX1	myxovirus (influenza virus) resistance 1, interferon-inducible protein p78 (mouse) [Source:NCBI gene;Acc:395313]	1	110239567	110260524	protein_coding	1		MX1
ENSGALG00000031035	0.880475	5.91242	9.13427	0.00250865	0.139545	ENSGALG00000031035	ENSGALG00000031035.3	PCMTD1	protein-L-isoaspartate (D-aspartate) O-methyltransferase domain containing 1 [Source:NCBI gene;Acc:421114]	2	109465995	109509669	protein_coding	-1		PCMTD1
ENSGALG00000017085	-1.06594	4.55501	9.12473	0.00252177	0.139637	ENSGALG00000017085	ENSGALG00000017085.6	SLC7A1	solute carrier family 7 member 1 [Source:NCBI gene;Acc:418922]	1	176789375	176807957	protein_coding	1		SLC7A1
ENSGALG00000040434	1.97364	4.33447	9.1088	0.00254383	0.140221	ENSGALG00000040434	ENSGALG00000040434.2		ras-related protein Rab-18-B-like [Source:NCBI gene;Acc:425531]	27	5894430	5900399	protein_coding	-1		RAB18L
ENSGALG00000045740	2.42778	2.01632	9.09604	0.00256164	0.140567	ENSGALG00000045740	ENSGALG00000045740.2		hemogen [Source:NCBI gene;Acc:427378]	Z	70867892	70872717	lncRNA	1		HEMGN
ENSGALG00000014722	1.59156	1.33645	9.03039	0.00265528	0.144696	ENSGALG00000014722	ENSGALG00000014722.6		C-type lectin-like receptor variant [Source:NCBI gene;Acc:769174]	1	79179715	79187290	protein_coding	-1		LOC769174
ENSGALG00000008006	1.69918	3.00419	9.0267	0.00266064	0.144696	ENSGALG00000008006	ENSGALG00000008006.5	CAPN6	calpain 6 [Source:NCBI gene;Acc:422341]	4	13332487	13379286	protein_coding	1	CAPN6	CAPN6
ENSGALG00000053241	1.86696	3.38009	9.01352	0.00267989	0.145095	ENSGALG00000053241	ENSGALG00000053241.1		uncharacterized LOC424199 [Source:NCBI gene;Acc:424199]	7	22082731	22084314	protein_coding	-1		LOC424199
ENSGALG00000011203	1.48235	2.67422	8.99193	0.00271175	0.14617	ENSGALG00000011203	ENSGALG00000011203.6	HPSE	heparanase [Source:NCBI gene;Acc:373981]	4	46439548	46444745	protein_coding	-1		HPSE
ENSGALG00000012613	1.22774	1.79848	8.93225	0.00280179	0.150358	ENSGALG00000012613	ENSGALG00000012613.6	FBP1	fructose-bisphosphatase 1 [Source:NCBI gene;Acc:395218]	Z	41459118	41469158	protein_coding	-1		FBP1
ENSGALG00000001916	2.40904	2.96867	8.89587	0.00285816	0.152711	ENSGALG00000001916	ENSGALG00000001916.6	SLIT3	slit guidance ligand 3 [Source:NCBI gene;Acc:374173]	13	4953827	5426056	protein_coding	1		SLIT3
ENSGALG00000011687	1.33224	5.72958	8.85011	0.00293072	0.155904	ENSGALG00000011687	ENSGALG00000011687.6		AHNAK nucleoprotein 2 [Source:NCBI gene;Acc:100859120]	5	52000607	52016763	protein_coding	-1		AHNAK2
ENSGALG00000029569	1.8225	2.64067	8.84188	0.00294396	0.155927	ENSGALG00000029569	ENSGALG00000029569.2		GTPase IMAP family member 7-like [Source:NCBI gene;Acc:429682]	2	519057	520883	protein_coding	-1		LOC429682
ENSGALG00000008486	1.10216	3.61645	8.82519	0.002971	0.156678	ENSGALG00000008486	ENSGALG00000008486.9	CACNA2D1	calcium voltage-gated channel auxiliary subunit alpha2delta 1 [Source:NCBI gene;Acc:768444]	1	10375977	10734880	protein_coding	1		CACNA2D1
ENSGALG00000010925	0.815574	5.67526	8.81306	0.00299081	0.157044	ENSGALG00000010925	ENSGALG00000010925.7	FAM126A	family with sequence similarity 126 member A [Source:NCBI gene;Acc:420611]	2	30895603	30933262	protein_coding	-1		FAM126A
ENSGALG00000047380	1.9133	2.24786	8.78703	0.00303379	0.158617	ENSGALG00000047380	ENSGALG00000047380.1		MHC class I polypeptide-related sequence A [Source:NCBI gene;Acc:417067]	16	2001694	2114403	protein_coding	1		MICA
ENSGALG00000046729	1.2186	2.00208	8.75759	0.00308317	0.159859	ENSGALG00000046729	ENSGALG00000046729.1		macrophage mannose receptor 1-like [Source:NCBI gene;Acc:107049166]	30	718987	728715	protein_coding	-1		LOC107049166
ENSGALG00000051188	1.43586	4.72288	8.75561	0.00308651	0.159859	ENSGALG00000051188	ENSGALG00000051188.1		class I histocompatibility antigen, F10 alpha chain-like [Source:NCBI gene;Acc:107054704]	KZ626819.1	1139	38348	protein_coding	-1		LOC107054704
ENSGALG00000021040	1.05915	4.27987	8.74947	0.00309693	0.159859	ENSGALG00000021040	ENSGALG00000021040.5	HAGHL	hydroxyacylglutathione hydrolase-like [Source:NCBI gene;Acc:416536]	14	6435737	6439442	protein_coding	-1		HAGHL
ENSGALG00000007001	1.39932	3.42976	8.7118	0.00316158	0.162303	ENSGALG00000007001	ENSGALG00000007001.4	TLR4	toll like receptor 4 [Source:NCBI gene;Acc:417241]	17	3938812	3944462	protein_coding	1		TLR4
ENSGALG00000015433	0.937494	4.24472	8.69471	0.00319136	0.162303	ENSGALG00000015433	ENSGALG00000015433.8	ABCA1	ATP-binding cassette, sub-family A (ABC1), member 1 [Source:NCBI gene;Acc:373945]	Z	54811100	54902450	protein_coding	-1		ABCA1
ENSGALG00000005909	1.27913	2.88101	8.68801	0.00320309	0.162303	ENSGALG00000005909	ENSGALG00000005909.6	GATA2	GATA binding protein 2 [Source:NCBI gene;Acc:416018]	12	9596109	9612130	protein_coding	1		GATA2
ENSGALG00000028790	1.42268	3.62388	8.68385	0.00321042	0.162303	ENSGALG00000028790	ENSGALG00000028790.3	DNASE2B	deoxyribonuclease 2 beta [Source:NCBI gene;Acc:424540]	8	16993720	17017021	protein_coding	-1		DNASE2B
ENSGALG00000026553	1.51334	1.63893	8.68358	0.00321089	0.162303	ENSGALG00000026553	ENSGALG00000026553.3		cardiomyopathy associated 5 [Source:NCBI gene;Acc:427177]	Z	22126658	22173992	protein_coding	-1		CMYA5
ENSGALG00000012061	2.90523	3.25806	8.65898	0.00325453	0.163829	ENSGALG00000012061	ENSGALG00000012061.6		glycerol-3-phosphate dehydrogenase 1-like 2 [Source:NCBI gene;Acc:424263]	7	28185901	28203831	protein_coding	1		GPD1L2
ENSGALG00000035856	1.08425	4.33805	8.63963	0.00328928	0.164897	ENSGALG00000035856	ENSGALG00000035856.2	CD48	CD48 molecule [Source:NCBI gene;Acc:100859319]	25	2468024	2470555	protein_coding	-1		CD48
ENSGALG00000008629	1.73492	2.65556	8.5914	0.00337755	0.168628	ENSGALG00000008629	ENSGALG00000008629.6	MRC1	mannose receptor C-type 1 [Source:NCBI gene;Acc:420516]	2	19573334	19621981	protein_coding	-1		MRC1
ENSGALG00000006378	0.923557	5.15066	8.56286	0.0034309	0.169241	ENSGALG00000006378	ENSGALG00000006378.6	LIPA	lipase A, lysosomal acid type [Source:NCBI gene;Acc:423789]	6	20166929	20179294	protein_coding	-1	LIPA	LIPA
ENSGALG00000002201	1.76202	4.93465	8.56273	0.00343115	0.169241	ENSGALG00000002201	ENSGALG00000002201.6	PPL	periplakin [Source:NCBI gene;Acc:408044]	14	13658840	13679023	protein_coding	-1	PPL	PPL
ENSGALG00000032701	1.45698	2.56163	8.56254	0.0034315	0.169241	ENSGALG00000032701	ENSGALG00000032701.2	LY96	lymphocyte antigen 96 [Source:NCBI gene;Acc:420189]	2	118035819	118043555	protein_coding	1	LY96	LY96
ENSGALG00000052767	1.78791	3.20902	8.52373	0.00350545	0.172191	ENSGALG00000052767	ENSGALG00000052767.1			1	197280001	197281526	protein_coding	1
ENSGALG00000042388	2.10856	2.80463	8.50437	0.00354294	0.173334	ENSGALG00000042388	ENSGALG00000042388.3			3	58251920	58452855	protein_coding	-1
ENSGALG00000010560	0.957456	4.9493	8.49481	0.00356161	0.17355	ENSGALG00000010560	ENSGALG00000010560.2	EIF2AK2	eukaryotic translation initiation factor 2 alpha kinase 2 [Source:NCBI gene;Acc:395147]	3	32108928	32127395	protein_coding	1		EIF2AK2
ENSGALG00000007418	1.14526	3.00829	8.45434	0.00364174	0.176748	ENSGALG00000007418	ENSGALG00000007418.5	CD3D	CD3d molecule [Source:NCBI gene;Acc:396518]	24	5487325	5489870	protein_coding	-1		CD3D
ENSGALG00000007766	1.16196	3.03818	8.40319	0.00374562	0.180005	ENSGALG00000007766	ENSGALG00000007766.6	KIAA1217	KIAA1217 [Source:NCBI gene;Acc:420501]	2	16935030	17269638	protein_coding	-1	KIAA1217	KIAA1217
ENSGALG00000001256	1.22618	3.99782	8.40205	0.00374799	0.180005	ENSGALG00000001256	ENSGALG00000001256.6	NLRC5	NLR family CARD domain containing 5 [Source:NCBI gene;Acc:100857413]	11	631380	666403	protein_coding	1		NLRC5
ENSGALG00000016744	1.79542	2.1808	8.39808	0.00375618	0.180005	ENSGALG00000016744	ENSGALG00000016744.6	GABRA5	gamma-aminobutyric acid type A receptor alpha5 subunit [Source:NCBI gene;Acc:418684]	1	132566482	132611904	protein_coding	-1	GABRA5	GABRA5
ENSGALG00000029381	1.17118	4.41174	8.38785	0.00377737	0.180005	ENSGALG00000029381	ENSGALG00000029381.2			16	2592345	2605843	protein_coding	1
ENSGALG00000012075	1.27406	4.48956	8.38528	0.00378273	0.180005	ENSGALG00000012075	ENSGALG00000012075.6	DTX3L	deltex E3 ubiquitin ligase 3L [Source:NCBI gene;Acc:424267]	7	28256073	28261454	protein_coding	-1	DTX3L	DTX3L
ENSGALG00000016693	1.45698	2.75749	8.37455	0.00380511	0.180287	ENSGALG00000016693	ENSGALG00000016693.5	CSF2RA	colony stimulating factor 2 receptor alpha subunit [Source:NCBI gene;Acc:418666]	1	130482654	130498132	protein_coding	-1		CSF2RA
ENSGALG00000049065	0.827158	4.13649	8.36829	0.00381825	0.180287	ENSGALG00000049065	ENSGALG00000049065.1	ZFPM1	zinc finger protein, FOG family member 1 [Source:NCBI gene;Acc:415835]	11	18340542	18369822	protein_coding	1	ZFPM1	ZFPM1
ENSGALG00000027757	0.750778	4.79424	8.35863	0.0038386	0.180548	ENSGALG00000027757	ENSGALG00000027757.3	ARL4A	ADP ribosylation factor like GTPase 4A [Source:NCBI gene;Acc:420589]	2	26800481	26802605	protein_coding	1	ARL4A	ARL4A
ENSGALG00000026768	1.50788	2.29184	8.32673	0.00390659	0.183039	ENSGALG00000026768	ENSGALG00000026768.3		solute carrier organic anion transporter family member 4C1 [Source:NCBI gene;Acc:769132]	Z	50341879	50367907	protein_coding	1		SLCO4C1
ENSGALG00000037629	1.2281	4.80375	8.31099	0.00394059	0.183924	ENSGALG00000037629	ENSGALG00000037629.2	TRANK1	tetratricopeptide repeat and ankyrin repeat containing 1 [Source:NCBI gene;Acc:420728]	2	45896594	45935972	protein_coding	-1	TRANK1	TRANK1
ENSGALG00000045581	1.30994	3.05527	8.29928	0.00396608	0.184407	ENSGALG00000045581	ENSGALG00000045581.2		GTPase IMAP family member 8-like [Source:NCBI gene;Acc:420368]	2	505017	507099	protein_coding	1		LOC420368
ENSGALG00000005644	1.19839	1.90873	8.27825	0.00401228	0.184708	ENSGALG00000005644	ENSGALG00000005644.6	MYO1G	myosin IG [Source:NCBI gene;Acc:420412]	2	4129233	4138053	pseudogene	1		MYO1G
ENSGALG00000052426	1.75181	1.57747	8.27655	0.00401605	0.184708	ENSGALG00000052426	ENSGALG00000052426.1			4	10994650	10996190	lncRNA	-1
ENSGALG00000037929	1.28576	2.76609	8.2737	0.00402234	0.184708	ENSGALG00000037929	ENSGALG00000037929.2	BIN2	bridging integrator 2 [Source:NCBI gene;Acc:777552]	33	5033336	5044090	protein_coding	-1		BIN2
ENSGALG00000036743	1.03675	5.68489	8.26881	0.0040332	0.184708	ENSGALG00000036743	ENSGALG00000036743.3	MGAT3	mannosyl (beta-1,4-)-glycoprotein beta-1,4-N-acetylglucosaminyltransferase [Source:NCBI gene;Acc:418013]	1	50628618	50645593	protein_coding	-1		MGAT3
ENSGALG00000026081	1.37614	4.65747	8.20969	0.00416673	0.188671	ENSGALG00000026081	ENSGALG00000026081.3	RBM38	RNA binding motif protein 38 [Source:NCBI gene;Acc:768866]	20	11615331	11629002	protein_coding	-1		RBM38
ENSGALG00000046032	1.559	2.47009	8.20665	0.00417371	0.188671	ENSGALG00000046032	ENSGALG00000046032.2	CD83	CD83 molecule [Source:NCBI gene;Acc:420838]	2	60692920	60705622	protein_coding	1	CD83	CD83
ENSGALG00000003286	-1.46878	1.95708	8.20578	0.00417571	0.188671	ENSGALG00000003286	ENSGALG00000003286.7	ACSBG1	acyl-CoA synthetase bubblegum family member 1 [Source:NCBI gene;Acc:415361]	10	4198612	4227772	protein_coding	1	ACSBG1	ACSBG1
ENSGALG00000005043	1.53015	1.24955	8.2032	0.00418167	0.188671	ENSGALG00000005043	ENSGALG00000005043.7		acetyl-CoA carboxylase beta [Source:HGNC Symbol;Acc:HGNC:85]	15	6963505	6970903	protein_coding	1
ENSGALG00000029834	1.32046	4.76104	8.148	0.00431087	0.193783	ENSGALG00000029834	ENSGALG00000029834.2	AIF1L	allograft inflammatory factor 1-like [Source:NCBI gene;Acc:417179]	17	6378663	6390710	protein_coding	1	AIF1L	C9ORF58
ENSGALG00000002555	1.98415	1.96431	8.1356	0.00434045	0.194395	ENSGALG00000002555	ENSGALG00000002555.7	RET	ret proto-oncogene [Source:NCBI gene;Acc:396107]	6	5520195	5598425	protein_coding	-1		RET
ENSGALG00000009149	-0.84151	5.38221	8.09906	0.00442883	0.197626	ENSGALG00000009149	ENSGALG00000009149.7			7	15401946	15406358	protein_coding	1
ENSGALG00000006785	1.47733	6.12778	8.09019	0.00445055	0.197871	ENSGALG00000006785	ENSGALG00000006785.6	IRF1	interferon regulatory factor 1 [Source:NCBI gene;Acc:396384]	13	17591206	17597339	protein_coding	-1		IRF1
ENSGALG00000010258	1.39889	6.4613	8.07558	0.00448657	0.198747	ENSGALG00000010258	ENSGALG00000010258.6	LTBP2	latent transforming growth factor beta binding protein 2 [Source:NCBI gene;Acc:428888]	5	38139299	38205852	protein_coding	-1	LTBP2	LTBP2
ENSGALG00000046187	1.21847	5.14279	8.05211	0.00454508	0.19973	ENSGALG00000046187	ENSGALG00000046187.2	PARP12	poly(ADP-ribose) polymerase family member 12 [Source:NCBI gene;Acc:418100]	1	55733220	55749482	protein_coding	1	PARP12	PARP12
ENSGALG00000003196	1.69065	3.48329	8.05016	0.00454996	0.19973	ENSGALG00000003196	ENSGALG00000003196.6	RNASE6	ribonuclease A family member k6 [Source:NCBI gene;Acc:396194]	6	9949854	9959635	protein_coding	-1		RNASE6
ENSGALG00000000783	1.26648	3.37555	8.04698	0.00455795	0.19973	ENSGALG00000000783	ENSGALG00000000783.7	PTAFR	platelet activating factor receptor [Source:NCBI gene;Acc:428209]	23	1627960	1636790	protein_coding	-1	PTAFR	PTAFR
ENSGALG00000019061	3.00232	3.51867	8.02782	0.00460642	0.200659	ENSGALG00000019061	ENSGALG00000019061.5	MMP1	matrix metallopeptidase 1 [Source:NCBI gene;Acc:418982]	1	183793774	183800290	protein_coding	1	MMP1	MMP1
ENSGALG00000039156	1.25792	0.527948	8.02559	0.00461209	0.200659	ENSGALG00000039156	ENSGALG00000039156.3		RAS protein activator like 3 [Source:NCBI gene;Acc:101747651]	30	770562	784767	pseudogene	1		RASAL3
ENSGALG00000017119	1.20531	3.69339	7.98731	0.00471062	0.204216	ENSGALG00000017119	ENSGALG00000017119.6	TNFRSF19	TNF receptor superfamily member 19 [Source:NCBI gene;Acc:418943]	1	178822909	178879534	protein_coding	-1		TNFRSF19
ENSGALG00000043506	-1.4802	3.52116	7.97845	0.00473375	0.204491	ENSGALG00000043506	ENSGALG00000043506.2	NMB	neuromedin B [Source:NCBI gene;Acc:415333]	10	1476303	1479577	protein_coding	1		NMB
ENSGALG00000008756	0.997012	4.08493	7.95899	0.00478491	0.205147	ENSGALG00000008756	ENSGALG00000008756.4	PLEK	pleckstrin [Source:NCBI gene;Acc:395669]	3	11941428	11957951	protein_coding	1		PLEK
ENSGALG00000048409	0.858509	7.40643	7.95804	0.00478742	0.205147	ENSGALG00000048409	ENSGALG00000048409.1	TXNIP	thioredoxin interacting protein [Source:HGNC Symbol;Acc:HGNC:16952]	25	1948755	1958413	protein_coding	1	TXNIP
ENSGALG00000028118	-4.26752	5.43935	7.9535	0.00479944	0.205147	ENSGALG00000028118	ENSGALG00000028118.3	MSMP	microseminoprotein, prostate associated [Source:NCBI gene;Acc:769825]	Z	9113971	9115313	protein_coding	1	MSMP	MSMP
ENSGALG00000001642	-0.894587	7.08877	7.93328	0.00485336	0.206219	ENSGALG00000001642	ENSGALG00000001642.6	GLT8D1	glycosyltransferase 8 domain containing 1 [Source:NCBI gene;Acc:415898]	12	1175090	1180455	protein_coding	-1		GLT8D1
ENSGALG00000001329	1.25161	5.28716	7.93141	0.00485839	0.206219	ENSGALG00000001329	ENSGALG00000001329.6	EPB41	erythrocyte membrane protein band 4.1 [Source:NCBI gene;Acc:396493]	23	2743037	2816538	protein_coding	1		EPB41
ENSGALG00000029583	0.925058	4.22477	7.92186	0.00488409	0.20659	ENSGALG00000029583	ENSGALG00000029583.2	PLBD1	phospholipase B domain containing 1 [Source:NCBI gene;Acc:417967]	1	48905356	48942414	protein_coding	-1	PLBD1	PLBD1
ENSGALG00000001998	0.945701	5.7225	7.90752	0.00492296	0.207514	ENSGALG00000001998	ENSGALG00000001998.6	R3HDM4	R3H domain containing 4 [Source:NCBI gene;Acc:770563]	28	2942189	2947196	protein_coding	-1	R3HDM4	R3HDM4
ENSGALG00000053940	1.3796	1.25527	7.89397	0.00496	0.207905	ENSGALG00000053940	ENSGALG00000053940.1			17	6432536	6438184	lncRNA	1
ENSGALG00000016964	1.78258	3.09314	7.88986	0.00497126	0.207905	ENSGALG00000016964	ENSGALG00000016964.6			1	167989491	168020290	protein_coding	-1
ENSGALG00000029669	1.36407	4.49484	7.88544	0.00498343	0.207905	ENSGALG00000029669	ENSGALG00000029669.2	C1QC	complement C1q C chain [Source:NCBI gene;Acc:419503]	21	6076987	6078857	protein_coding	-1	C1QC	C1QC
ENSGALG00000041257	2.12551	1.43749	7.87267	0.00501874	0.208368	ENSGALG00000041257	ENSGALG00000041257.2	ACVR1C	activin A receptor type 1C [Source:NCBI gene;Acc:424325]	7	36236395	36252054	protein_coding	-1	ACVR1C	ACVR1C
ENSGALG00000049564	0.798376	4.76639	7.86907	0.00502874	0.208368	ENSGALG00000049564	ENSGALG00000049564.1			AADN05001396.1	21	1441	lncRNA	1
ENSGALG00000001373	1.28794	2.46338	7.81505	0.00518128	0.213382	ENSGALG00000001373	ENSGALG00000001373.6	TRAF3IP3	TRAF3 interacting protein 3 [Source:NCBI gene;Acc:419862]	26	3154638	3288987	protein_coding	1	TRAF3IP3	TRAF3IP3
ENSGALG00000030571	1.88107	2.20276	7.81383	0.00518479	0.213382	ENSGALG00000030571	ENSGALG00000030571.3			1	168025737	168042111	protein_coding	-1
ENSGALG00000045199	1.10153	5.762	7.80005	0.00522449	0.214244	ENSGALG00000045199	ENSGALG00000045199.2		dispanin subfamily A member 2b-like [Source:NCBI gene;Acc:107053353]	5	1819414	1821290	protein_coding	1		LOC107053353
ENSGALG00000009689	1.42209	3.87599	7.7901	0.00525334	0.214244	ENSGALG00000009689	ENSGALG00000009689.7	PON1	paraoxonase 1 [Source:NCBI gene;Acc:395830]	2	23853489	23867206	protein_coding	-1		PON1
ENSGALG00000013057	1.16609	4.21456	7.78833	0.00525849	0.214244	ENSGALG00000013057	ENSGALG00000013057.6		ubiquitin specific peptidase 41 [Source:NCBI gene;Acc:418167]	1	62069663	62083647	protein_coding	1		USP41
ENSGALG00000034756	1.38894	2.14759	7.77271	0.00530415	0.215384	ENSGALG00000034756	ENSGALG00000034756.3		connective tissue growth factor-like [Source:NCBI gene;Acc:776271]	23	2734269	2742975	protein_coding	1		CTGFL
ENSGALG00000015356	-0.660535	4.90233	7.72782	0.00543763	0.22007	ENSGALG00000015356	ENSGALG00000015356.6	IFT57	intraflagellar transport 57 [Source:NCBI gene;Acc:418409]	1	88731807	88749184	protein_coding	-1	IFT57	IFT57
ENSGALG00000042871	-1.26059	4.78362	7.69387	0.00554086	0.222576	ENSGALG00000042871	ENSGALG00000042871.2	SLIT1	slit guidance ligand 1 [Source:NCBI gene;Acc:395293]	6	23344960	23376231	pseudogene	1		SLIT1
ENSGALG00000005964	1.1638	3.15021	7.69124	0.00554896	0.222576	ENSGALG00000005964	ENSGALG00000005964.6		family with sequence similarity 162, member B [Source:NCBI gene;Acc:422224]	4	3068330	3073413	protein_coding	1		LOC422224
ENSGALG00000009400	-3.90891	5.08964	7.68948	0.00555436	0.222576	ENSGALG00000009400	ENSGALG00000009400.7	SLC8A3	solute carrier family 8 member A3 [Source:NCBI gene;Acc:395759]	5	27839047	27917728	protein_coding	1		SLC8A3
ENSGALG00000003478	1.57877	2.03062	7.68108	0.00558026	0.222881	ENSGALG00000003478	ENSGALG00000003478.4	GFI1B	growth factor independent 1B transcriptional repressor [Source:NCBI gene;Acc:395977]	17	7053329	7062205	protein_coding	1		GFI1B
ENSGALG00000042836	1.18413	1.74908	7.66765	0.00562197	0.223813	ENSGALG00000042836	ENSGALG00000042836.2	KCNH2	potassium voltage-gated channel subfamily H member 2 [Source:NCBI gene;Acc:100858122]	2	362630	393535	protein_coding	1	KCNH2	KCNH2
ENSGALG00000038943	1.14369	2.06085	7.6561	0.00565807	0.223986	ENSGALG00000038943	ENSGALG00000038943.3	RASSF5	Ras association domain family member 5 [Source:NCBI gene;Acc:419844]	26	2489952	2508040	protein_coding	1		RASSF5
ENSGALG00000028982	1.88855	4.69697	7.6545	0.00566308	0.223986	ENSGALG00000028982	ENSGALG00000028982.3	CMPK2	cytidine/uridine monophosphate kinase 2 [Source:NCBI gene;Acc:421921]	3	94980479	94986009	protein_coding	-1	CMPK2	CMPK2
ENSGALG00000015375	1.28275	1.47243	7.61325	0.00579409	0.227896	ENSGALG00000015375	ENSGALG00000015375.6	PLCXD2	phosphatidylinositol specific phospholipase C X domain containing 2 [Source:NCBI gene;Acc:418417]	1	89665094	89684871	protein_coding	1	PLCXD2	PLCXD2
ENSGALG00000007416	0.955592	3.03416	7.60857	0.00580916	0.227896	ENSGALG00000007416	ENSGALG00000007416.6	CD3E	CD3e molecule [Source:NCBI gene;Acc:396062]	24	5480338	5485277	protein_coding	1		CD3E
ENSGALG00000026311	1.80845	1.8444	7.6001	0.00583651	0.227896	ENSGALG00000026311	ENSGALG00000026311.2	C12orf75	chromosome 12 open reading frame 75 [Source:NCBI gene;Acc:771624]	1	54179279	54183383	protein_coding	-1		C12orf75
ENSGALG00000007526	-1.2122	8.26332	7.59607	0.00584958	0.227896	ENSGALG00000007526	ENSGALG00000007526.6		putative glutamine amidotransferase like class 1 domain containing 3A-like 2 [Source:NCBI gene;Acc:422305]	4	11295349	11299195	protein_coding	-1		GATD3AL2
ENSGALG00000017190	-1.16191	2.84373	7.59425	0.00585547	0.227896	ENSGALG00000017190	ENSGALG00000017190.7	CEP126	centrosomal protein 126 [Source:NCBI gene;Acc:100859489]	1	184104312	184140429	protein_coding	-1	CEP126	CEP126
ENSGALG00000043234	2.11101	12.0717	7.587	0.00587906	0.228085	ENSGALG00000043234	ENSGALG00000043234.3	HBA1	hemoglobin subunit alpha 1 [Source:NCBI gene;Acc:416652]	14	12510348	12511196	protein_coding	1		HBA1
ENSGALG00000045729	1.2028	1.30909	7.58122	0.00589794	0.228091	ENSGALG00000045729	ENSGALG00000045729.2	HHIPL2	HHIP like 2 [Source:NCBI gene;Acc:421339]	3	18172150	18187318	protein_coding	1	HHIPL2	HHIPL2
ENSGALG00000041120	-0.780642	4.80112	7.57191	0.00592848	0.228345	ENSGALG00000041120	ENSGALG00000041120.3	METTL24	methyltransferase like 24 [Source:NCBI gene;Acc:421758]	3	66578513	66621450	protein_coding	1	METTL24	METTL24
ENSGALG00000005257	1.08526	4.46296	7.56781	0.00594201	0.228345	ENSGALG00000005257	ENSGALG00000005257.5		vascular cell adhesion molecule 1 [Source:NCBI gene;Acc:424467]	8	12271795	12279181	protein_coding	1		VCAM1
ENSGALG00000009965	1.41139	2.11785	7.56053	0.00596605	0.228548	ENSGALG00000009965	ENSGALG00000009965.5	MPL	MPL proto-oncogene, thrombopoietin receptor [Source:NCBI gene;Acc:414804]	8	20024802	20028925	pseudogene	1		MPL
ENSGALG00000004853	0.879686	3.98509	7.53201	0.00606123	0.231467	ENSGALG00000004853	ENSGALG00000004853.6	LRP3	LDL receptor related protein 3 [Source:NCBI gene;Acc:415773]	11	10057900	10080398	protein_coding	1	LRP3	LRP3
ENSGALG00000002549	1.35222	2.0253	7.51104	0.00613221	0.233348	ENSGALG00000002549	ENSGALG00000002549.7	RGS1	regulator of G-protein signaling 1 [Source:NCBI gene;Acc:424360]	8	3999641	4003821	protein_coding	-1	RGS1	RGS1
ENSGALG00000035065	-0.828161	3.59281	7.50617	0.00614879	0.233348	ENSGALG00000035065	ENSGALG00000035065.2	FAM110B	family with sequence similarity 110 member B [Source:NCBI gene;Acc:421134]	2	111903414	111904526	protein_coding	1	FAM110B	FAM110B
ENSGALG00000002878	0.909079	4.67052	7.49963	0.00617117	0.23347	ENSGALG00000002878	ENSGALG00000002878.7	CREBRF	CREB3 regulatory factor [Source:NCBI gene;Acc:416206]	13	9873168	9892226	protein_coding	1	CREBRF	CREBRF
ENSGALG00000011376	1.31179	1.10325	7.48913	0.00620724	0.234107	ENSGALG00000011376	ENSGALG00000011376.6	ANKRD9	ankyrin repeat domain 9 [Source:NCBI gene;Acc:423469]	5	49842461	49843339	protein_coding	-1	ANKRD9	ANKRD9
ENSGALG00000032469	0.843421	3.81686	7.47835	0.00624453	0.234787	ENSGALG00000032469	ENSGALG00000032469.2	ARHGAP45	Rho GTPase activating protein 45 [Source:NCBI gene;Acc:420102]	28	3019600	3031885	protein_coding	1		ARHGAP45
ENSGALG00000016202	1.35858	0.913879	7.4674	0.00628261	0.235075	ENSGALG00000016202	ENSGALG00000016202.6	HSF2BP	heat shock transcription factor 2 binding protein [Source:NCBI gene;Acc:418548]	1	111301459	111335748	protein_coding	-1	HSF2BP	HSF2BP
ENSGALG00000028304	1.17637	3.23757	7.46484	0.00629155	0.235075	ENSGALG00000028304	ENSGALG00000028304.3	MMR1L4	macrophage mannose receptor 1-like 4 [Source:NCBI gene;Acc:771888]	2	19542337	19568271	protein_coding	-1		MMR1L4
ENSGALG00000011149	1.00401	4.17868	7.45954	0.0063101	0.235075	ENSGALG00000011149	ENSGALG00000011149.5	PLA2R1	phospholipase A2 receptor 1 [Source:NCBI gene;Acc:404304]	7	21828489	21864267	protein_coding	1		PLA2R1
ENSGALG00000007357	0.669163	4.6934	7.44952	0.00634533	0.235667	ENSGALG00000007357	ENSGALG00000007357.3	BCL6	B-cell CLL/lymphoma 6 [Source:NCBI gene;Acc:424912]	9	14938213	14954449	protein_coding	1		BCL6
ENSGALG00000021395	1.38183	3.50267	7.44065	0.00637668	0.236112	ENSGALG00000021395	ENSGALG00000021395.5		ATP-binding cassette, sub-family A (ABC1), member 9 [Source:NCBI gene;Acc:417443]	18	7924961	7946282	protein_coding	-1		ABCA9
ENSGALG00000031527	1.61276	2.76979	7.42235	0.00644184	0.237802	ENSGALG00000031527	ENSGALG00000031527.2	ARL8BL	ADP-ribosylation factor-like 8B-like [Source:NCBI gene;Acc:769134]	1	22204054	22231720	protein_coding	-1		ARL8BL
ENSGALG00000032658	0.977245	3.2766	7.41064	0.00648393	0.238632	ENSGALG00000032658	ENSGALG00000032658.3	FMNL1	formin like 1 [Source:NCBI gene;Acc:419965]	27	3775310	3882647	protein_coding	1	FMNL1	FMNL1
ENSGALG00000007641	0.890599	3.90237	7.36605	0.00664667	0.243885	ENSGALG00000007641	ENSGALG00000007641.6	LDB1	LIM domain binding 1 [Source:NCBI gene;Acc:395952]	6	23470328	23489022	protein_coding	1		LDB1
ENSGALG00000030363	0.68739	4.59462	7.35444	0.00668973	0.244728	ENSGALG00000030363	ENSGALG00000030363.2	IFNAR1	interferon alpha and beta receptor subunit 1 [Source:NCBI gene;Acc:395665]	1	106613562	106632348	protein_coding	1		IFNAR1
ENSGALG00000038393	1.17089	2.72878	7.32876	0.00678599	0.247506	ENSGALG00000038393	ENSGALG00000038393.3	DMB2	major histocompatibility complex, class II, DM beta 2 [Source:NCBI gene;Acc:417051]	16	2589290	2592336	protein_coding	1		DMB2
ENSGALG00000008022	0.838942	6.15878	7.25686	0.00706305	0.256015	ENSGALG00000008022	ENSGALG00000008022.5	TAPBP	TAP binding protein [Source:NCBI gene;Acc:417048]	16	2567828	2571359	protein_coding	-1		TAPBP
ENSGALG00000031341	1.54837	2.3324	7.25567	0.00706775	0.256015	ENSGALG00000031341	ENSGALG00000031341.2		maltase-glucoamylase (alpha-glucosidase) [Source:NCBI gene;Acc:425545]	KZ626839.1	681601	721084	protein_coding	-1		MGAM
ENSGALG00000011235	1.51667	2.20916	7.25197	0.00708233	0.256015	ENSGALG00000011235	ENSGALG00000011235.6	GALNT15	polypeptide N-acetylgalactosaminyltransferase 15 [Source:NCBI gene;Acc:420642]	2	34255021	34277260	protein_coding	1	GALNT15	GALNT15
ENSGALG00000023950	0.651258	4.5733	7.23453	0.00715144	0.257748	ENSGALG00000023950	ENSGALG00000023950.4	CR1L	complement C3b/C4b receptor 1 like [Source:NCBI gene;Acc:419853]	26	2656096	2664136	protein_coding	1		CR1L
ENSGALG00000034655	-1.11922	8.55677	7.22056	0.00720732	0.258996	ENSGALG00000034655	ENSGALG00000034655.3	ALDH18A1	aldehyde dehydrogenase 18 family member A1 [Source:NCBI gene;Acc:423976]	6	36292713	36326373	protein_coding	1	ALDH18A1	ALDH18A1
ENSGALG00000047453	1.2147	3.08084	7.19826	0.00729744	0.260778	ENSGALG00000047453	ENSGALG00000047453.1			22	1637674	1639968	lncRNA	-1
ENSGALG00000039145	1.59647	2.96065	7.19238	0.00732137	0.260778	ENSGALG00000039145	ENSGALG00000039145.2	CA8	carbonic anhydrase 8 [Source:NCBI gene;Acc:421139]	2	112701443	112753254	protein_coding	-1	CA8	CA8
ENSGALG00000053511	0.887616	4.1679	7.19222	0.00732202	0.260778	ENSGALG00000053511	ENSGALG00000053511.1	APOLD1	apolipoprotein L domain containing 1 [Source:NCBI gene;Acc:769889]	1	48189928	48194910	protein_coding	1	APOLD1	APOLD1
ENSGALG00000004436	1.29689	1.78721	7.1872	0.00734254	0.260778	ENSGALG00000004436	ENSGALG00000004436.7	CYP3A4	cytochrome P450 family 3 subfamily A member 4 [Source:NCBI gene;Acc:416477]	14	4288119	4299512	protein_coding	1		CYP3A4
ENSGALG00000008727	-1.45058	1.87148	7.16799	0.00742161	0.262303	ENSGALG00000008727	ENSGALG00000008727.6		phospholipase A2 group IVB [Source:NCBI gene;Acc:101749229]	5	25395587	25420105	protein_coding	1		PLA2G4B
ENSGALG00000024318	1.26811	2.37718	7.16511	0.00743352	0.262303	ENSGALG00000024318	ENSGALG00000024318.4	TMEM200B	transmembrane protein 200B [Source:NCBI gene;Acc:428217]	23	2822852	2824408	protein_coding	-1	TMEM200B	TMEM200B
ENSGALG00000040807	1.10938	4.19501	7.16112	0.00745007	0.262303	ENSGALG00000040807	ENSGALG00000040807.2	DMTN	dematin actin binding protein [Source:NCBI gene;Acc:776542]	22	1641150	1647926	protein_coding	-1	DMTN	DMTN
ENSGALG00000001316	-0.669584	5.55249	7.15162	0.00748962	0.262442	ENSGALG00000001316	ENSGALG00000001316.7	CPNE2	copine 2 [Source:NCBI gene;Acc:415646]	11	668262	707441	protein_coding	1		CPNE2
ENSGALG00000000452	1.00412	3.51206	7.14983	0.00749711	0.262442	ENSGALG00000000452	ENSGALG00000000452.6	TNFRSF10B	tumor necrosis factor receptor superfamily, member 10b [Source:NCBI gene;Acc:373904]	22	1415487	1422100	protein_coding	1		TNFRSF10B
ENSGALG00000023395	3.02864	5.60669	7.13707	0.00755064	0.263018	ENSGALG00000023395	ENSGALG00000023395.5	PLIN1	perilipin 1 [Source:NCBI gene;Acc:415487]	10	13263392	13268054	protein_coding	1		PLIN1
ENSGALG00000054145	0.896753	3.76775	7.13504	0.00755921	0.263018	ENSGALG00000054145	ENSGALG00000054145.1			10	12097214	12107184	protein_coding	1
ENSGALG00000045153	1.78769	2.15705	7.13051	0.00757834	0.263018	ENSGALG00000045153	ENSGALG00000045153.2	SHISA3	shisa family member 3 [Source:NCBI gene;Acc:100857319]	4	68245100	68247053	protein_coding	-1	SHISA3	SHISA3
ENSGALG00000049873	1.02411	2.49775	7.11342	0.00765088	0.264073	ENSGALG00000049873	ENSGALG00000049873.1			1	252277	256896	lncRNA	-1
ENSGALG00000053970	1.39304	1.26532	7.11314	0.0076521	0.264073	ENSGALG00000053970	ENSGALG00000053970.1			22	1636003	1639337	lncRNA	1
ENSGALG00000047769	1.68147	1.50243	7.09844	0.00771513	0.265031	ENSGALG00000047769	ENSGALG00000047769.1			1	106225011	106239868	lncRNA	1
ENSGALG00000054999	-1.09235	8.39102	7.09652	0.00772336	0.265031	ENSGALG00000054999	ENSGALG00000054999.1			23	5128924	5136732	protein_coding	-1
ENSGALG00000027961	1.14153	0.684493	7.07355	0.00782302	0.267134	ENSGALG00000027961	ENSGALG00000027961.3	PCASP2	paracaspase 2 [Source:NCBI gene;Acc:429451]	28	1074042	1081172	protein_coding	-1		PCASP2
ENSGALG00000047627	1.52455	4.03416	7.07229	0.00782851	0.267134	ENSGALG00000047627	ENSGALG00000047627.1			16	2082890	2084768	protein_coding	-1
ENSGALG00000015779	1.06825	4.22394	7.06331	0.00786784	0.267726	ENSGALG00000015779	ENSGALG00000015779.6	PM20D2	peptidase M20 domain containing 2 [Source:NCBI gene;Acc:421816]	3	75796307	75810677	protein_coding	-1	PM20D2	PM20D2
ENSGALG00000006543	-0.846695	5.37043	7.0452	0.0079478	0.269605	ENSGALG00000006543	ENSGALG00000006543.6	PFKL	phosphofructokinase, liver type [Source:NCBI gene;Acc:769850]	9	4551587	4557627	protein_coding	1		PFKL
ENSGALG00000027786	0.76629	4.80965	7.03694	0.00798452	0.269605	ENSGALG00000027786	ENSGALG00000027786.4	SOCS3	suppressor of cytokine signaling 3 [Source:NCBI gene;Acc:395299]	18	9837554	9839601	protein_coding	1		SOCS3
ENSGALG00000033278	1.27507	0.0775518	7.03584	0.00798943	0.269605	ENSGALG00000033278	ENSGALG00000033278.2	NLRC3	NLR family CARD domain containing 3 [Source:NCBI gene;Acc:416673]	14	13150266	13163527	protein_coding	1	NLRC3	NLRC3
ENSGALG00000039120	0.795418	3.61508	7.03013	0.00801494	0.269718	ENSGALG00000039120	ENSGALG00000039120.3	NBEAL2	neurobeachin like 2 [Source:NCBI gene;Acc:425984]	2	3930912	3957545	protein_coding	1	NBEAL2	NBEAL2
ENSGALG00000053559	0.98783	6.46053	7.02202	0.00805133	0.270197	ENSGALG00000053559	ENSGALG00000053559.1			5	39086055	39089346	lncRNA	1
ENSGALG00000015677	0.951026	3.65691	7.00835	0.00811305	0.27054	ENSGALG00000015677	ENSGALG00000015677.6	SUSD1	sushi domain containing 1 [Source:NCBI gene;Acc:427334]	Z	66362196	66399087	protein_coding	1	SUSD1	SUSD1
ENSGALG00000048343	1.39124	0.708091	7.00555	0.00812573	0.27054	ENSGALG00000048343	ENSGALG00000048343.1		carboxylesterase 1 like 2 [Source:NCBI gene;Acc:769339]	11	11155098	11177848	protein_coding	-1		CES1L2
ENSGALG00000005589	1.09955	2.17152	7.0003	0.00814961	0.27054	ENSGALG00000005589	ENSGALG00000005589.7	SYNGR3	synaptogyrin 3 [Source:NCBI gene;Acc:416548]	14	6572269	6596578	protein_coding	1		SYNGR3
ENSGALG00000036358	-1.46039	0.663637	6.99996	0.00815114	0.27054	ENSGALG00000036358	ENSGALG00000036358.2	LMO3	LIM domain only 3 [Source:NCBI gene;Acc:418179]	1	63351924	63412998	protein_coding	-1	LMO3	LMO3
ENSGALG00000035940	-0.717456	4.82353	6.99525	0.00817262	0.27054	ENSGALG00000035940	ENSGALG00000035940.2	SLC2A13	solute carrier family 2 member 13 [Source:NCBI gene;Acc:769652]	1	15243988	15377569	protein_coding	1	SLC2A13	SLC2A13
ENSGALG00000007771	0.952133	3.22321	6.98013	0.00824195	0.271624	ENSGALG00000007771	ENSGALG00000007771.6	FAM210B	family with sequence similarity 210 member B [Source:NCBI gene;Acc:428168]	20	12027572	12032765	protein_coding	-1		FAM210B
ENSGALG00000041611	1.33928	1.53532	6.97506	0.00826534	0.271624	ENSGALG00000041611	ENSGALG00000041611.3			23	313700	315602	lncRNA	-1		LOC419545
ENSGALG00000013155	1.52714	1.33171	6.97071	0.00828545	0.271624	ENSGALG00000013155	ENSGALG00000013155.6		poly(rC) binding protein 2 [Source:NCBI gene;Acc:420965]	2	85442153	85618905	protein_coding	1		PCBP2
ENSGALG00000004771	1.08749	4.43665	6.96875	0.00829454	0.271624	ENSGALG00000004771	ENSGALG00000004771.7	C1QB	complement C1q B chain [Source:NCBI gene;Acc:428197]	21	6073556	6075682	protein_coding	-1	C1QB	C1QB
ENSGALG00000043672	1.07869	5.62544	6.94875	0.00838776	0.27394	ENSGALG00000043672	ENSGALG00000043672.2	STAB1	stabilin 1 [Source:NCBI gene;Acc:415894]	12	1023267	1074387	protein_coding	1	STAB1	STAB1
ENSGALG00000002982	1.33825	1.43639	6.93592	0.00844814	0.273989	ENSGALG00000002982	ENSGALG00000002982.5	SLC2A6	solute carrier family 2 member 6 [Source:NCBI gene;Acc:425954]	17	7235916	7240174	protein_coding	-1	SLC2A6	SLC2A6
ENSGALG00000053742	1.2294	0.427347	6.91845	0.00853109	0.273989	ENSGALG00000053742	ENSGALG00000053742.1		GRAM domain-containing protein 3-like [Source:NCBI gene;Acc:101748203]	28	1160094	1165845	protein_coding	1		LOC101748203
ENSGALG00000004252	1.06878	1.46566	6.91108	0.0085663	0.273989	ENSGALG00000004252	ENSGALG00000004252.6		cathepsin L1-like [Source:NCBI gene;Acc:420160]	28	5030693	5034171	protein_coding	1		LOC420160
ENSGALG00000002421	1.66801	3.80636	6.91069	0.00856817	0.273989	ENSGALG00000002421	ENSGALG00000002421.7	FAM213A	family with sequence similarity 213 member A [Source:NCBI gene;Acc:423625]	6	5107187	5115923	protein_coding	-1		FAM213A
ENSGALG00000045469	2.51425	2.95874	6.90913	0.00857567	0.273989	ENSGALG00000045469	ENSGALG00000045469.2	BCAN	brevican [Source:NCBI gene;Acc:425976]	25	2658942	2671332	protein_coding	1	BCAN	BCAN
ENSGALG00000016803	1.43393	1.82122	6.90765	0.00858278	0.273989	ENSGALG00000016803	ENSGALG00000016803.6	ST6GAL2	ST6 beta-galactoside alpha-2,6-sialyltransferase 2 [Source:NCBI gene;Acc:403122]	1	136952979	137035946	protein_coding	-1		ST6GAL2
ENSGALG00000030291	1.11156	2.47585	6.90741	0.00858395	0.273989	ENSGALG00000030291	ENSGALG00000030291.2	IRF9	interferon regulatory factor 9 [Source:NCBI gene;Acc:395243]	20	10063682	10066572	protein_coding	-1		IRF9
ENSGALG00000009520	1.3917	2.10036	6.90445	0.00859815	0.273989	ENSGALG00000009520	ENSGALG00000009520.6	MARCH1	membrane associated ring-CH-type finger 1 [Source:NCBI gene;Acc:422420]	4	23437223	23636944	protein_coding	-1		MARCH1
ENSGALG00000040655	1.25728	3.28894	6.9	0.0086196	0.273989	ENSGALG00000040655	ENSGALG00000040655.2	FAM20A	FAM20A, golgi associated secretory pathway pseudokinase [Source:NCBI gene;Acc:417439]	18	7870926	7880080	protein_coding	-1	FAM20A	FAM20A
ENSGALG00000003816	-1.06468	1.94871	6.89836	0.00862748	0.273989	ENSGALG00000003816	ENSGALG00000003816.6	NT5C1A	5'-nucleotidase, cytosolic IA [Source:NCBI gene;Acc:419675]	23	5644988	5652023	protein_coding	-1	NT5C1A	NT5C1A
ENSGALG00000027864	0.780279	5.28869	6.89357	0.00865066	0.273989	ENSGALG00000027864	ENSGALG00000027864.4	NFKBIA	NFKB inhibitor alpha [Source:NCBI gene;Acc:396093]	5	36403465	36406967	protein_coding	-1		NFKBIA
ENSGALG00000010628	0.947429	5.73971	6.89181	0.00865916	0.273989	ENSGALG00000010628	ENSGALG00000010628.6	ACSL1	acyl-CoA synthetase long-chain family member 1 [Source:NCBI gene;Acc:422547]	4	39432686	39469690	protein_coding	1		ACSL1
ENSGALG00000050893	1.26097	3.5556	6.88371	0.00869846	0.27452	ENSGALG00000050893	ENSGALG00000050893.1	CCR2	C-C motif chemokine receptor 2 [Source:NCBI gene;Acc:420696]	2	42632317	42640047	protein_coding	-1		CCR2
ENSGALG00000023821	1.40804	2.61544	6.86104	0.00880954	0.276083	ENSGALG00000023821	ENSGALG00000023821.4	DHX58	DExH-box helicase 58 [Source:NCBI gene;Acc:100858653]	27	7642263	7646075	protein_coding	-1		DHX58
ENSGALG00000047211	1.35156	1.72639	6.85871	0.00882103	0.276083	ENSGALG00000047211	ENSGALG00000047211.1	FCER1G	Fc fragment of IgE receptor Ig [Source:NCBI gene;Acc:100049618]	25	152758	153848	protein_coding	1		FCER1G
ENSGALG00000030432	0.979992	4.87855	6.8535	0.00884676	0.276083	ENSGALG00000030432	ENSGALG00000030432.3	RASSF2	Ras association domain family member 2 [Source:NCBI gene;Acc:419521]	22	559504	571288	protein_coding	1		RASSF2
ENSGALG00000049461	1.16312	5.74213	6.8533	0.00884776	0.276083	ENSGALG00000049461	ENSGALG00000049461.1	BG8	MHC B-G antigen [Source:NCBI gene;Acc:417035]	16	2283023	2395890	protein_coding	1		BG8
ENSGALG00000027633	2.17087	1.25602	6.85057	0.00886132	0.276083	ENSGALG00000027633	ENSGALG00000027633.4	RASSF9	Ras association domain family member 9 [Source:NCBI gene;Acc:427872]	1	42160804	42190042	protein_coding	-1	RASSF9	RASSF9
ENSGALG00000042452	1.42061	1.92158	6.84124	0.0089077	0.27682	ENSGALG00000042452	ENSGALG00000042452.3	DPP4	dipeptidyl peptidase 4 [Source:NCBI gene;Acc:424187]	7	21138002	21176764	protein_coding	1		DPP4
ENSGALG00000029027	1.15587	1.21151	6.83479	0.0089399	0.277114	ENSGALG00000029027	ENSGALG00000029027.3	SEPTIN12	septin 12 [Source:NCBI gene;Acc:416408]	14	13457248	13462102	protein_coding	1	SEPTIN12	SEPT12
ENSGALG00000008346	1.2252	1.85856	6.82528	0.00898766	0.2774	ENSGALG00000008346	ENSGALG00000008346.5	CASP18	initiator caspase [Source:NCBI gene;Acc:693266]	7	11436085	11444574	protein_coding	1		CASP18
ENSGALG00000003802	-1.00639	3.85728	6.8235	0.00899661	0.2774	ENSGALG00000003802	ENSGALG00000003802.6	OTUD7A	OTU deubiquitinase 7A [Source:NCBI gene;Acc:415380]	10	5926089	5995672	protein_coding	1	OTUD7A	OTUD7A
ENSGALG00000002113	1.10528	2.69988	6.81293	0.00904999	0.2774	ENSGALG00000002113	ENSGALG00000002113.6	LCP2	lymphocyte cytosolic protein 2 [Source:NCBI gene;Acc:395438]	13	4598169	4629140	protein_coding	1		LCP2
ENSGALG00000004833	-0.878275	8.70679	6.81009	0.00906443	0.2774	ENSGALG00000004833	ENSGALG00000004833.5	P3H1	prolyl 3-hydroxylase 1 [Source:NCBI gene;Acc:414142]	21	6377332	6383361	protein_coding	1		P3H1
ENSGALG00000004614	1.3594	3.12984	6.80904	0.00906973	0.2774	ENSGALG00000004614	ENSGALG00000004614.6	NPL	N-acetylneuraminate pyruvate lyase [Source:NCBI gene;Acc:429074]	8	7811903	7821247	protein_coding	1		NPL
ENSGALG00000027805	1.33315	1.81495	6.80071	0.00911214	0.2774	ENSGALG00000027805	ENSGALG00000027805.3		chromosome 15 open reading frame 39 [Source:NCBI gene;Acc:107049034]	10	2800575	2802906	protein_coding	-1		C15orf39
ENSGALG00000013640	1.47642	1.19934	6.79776	0.00912725	0.2774	ENSGALG00000013640	ENSGALG00000013640.6	MBP	myelin basic protein [Source:NCBI gene;Acc:396217]	2	90467903	90576864	protein_coding	1		MBP
ENSGALG00000012872	1.47128	0.712333	6.79697	0.00913128	0.2774	ENSGALG00000012872	ENSGALG00000012872.6	SERPINB11	serpin family B member 12 [Source:NCBI gene;Acc:420899]	2	67733489	67745143	protein_coding	-1	SERPINB11	SERPINB12
ENSGALG00000011096	0.884195	4.06822	6.78896	0.00917233	0.277954	ENSGALG00000011096	ENSGALG00000011096.6	ABCB10	ATP binding cassette subfamily B member 10 [Source:NCBI gene;Acc:421537]	3	40129566	40145393	protein_coding	-1	ABCB10	ABCB10
ENSGALG00000043064	2.59193	10.9437	6.78166	0.00920993	0.278255	ENSGALG00000043064	ENSGALG00000043064.2	EXFABP	extracellular fatty acid-binding protein [Source:NCBI gene;Acc:396393]	17	865358	868425	protein_coding	-1		EXFABP
ENSGALG00000008340	1.01706	2.73322	6.77817	0.00922795	0.278255	ENSGALG00000008340	ENSGALG00000008340.7	FES	FES proto-oncogene, tyrosine kinase [Source:NCBI gene;Acc:429374]	10	20534450	20539528	protein_coding	-1	FES	FES
ENSGALG00000047410	0.944754	5.68525	6.77195	0.00926016	0.278352	ENSGALG00000047410	ENSGALG00000047410.1			33	6533009	6537022	lncRNA	-1
ENSGALG00000028506	1.01267	3.14249	6.76057	0.00931941	0.278352	ENSGALG00000028506	ENSGALG00000028506.3	NHSL2	NHS like 2 [Source:NCBI gene;Acc:422133]	4	1678056	1695829	protein_coding	-1	NHSL2	NHSL2
ENSGALG00000050162	1.06391	2.24233	6.75626	0.00934192	0.278352	ENSGALG00000050162	ENSGALG00000050162.1			4	14240563	14254371	lncRNA	1
ENSGALG00000002260	0.720734	4.4911	6.75604	0.0093431	0.278352	ENSGALG00000002260	ENSGALG00000002260.5	CISH	cytokine inducible SH2 containing protein [Source:NCBI gene;Acc:395335]	12	2264031	2268470	protein_coding	-1		CISH
ENSGALG00000012787	-1.05638	6.04168	6.75559	0.00934543	0.278352	ENSGALG00000012787	ENSGALG00000012787.7	BMP6	bone morphogenetic protein 6 [Source:NCBI gene;Acc:420868]	2	64378425	64463337	protein_coding	-1	BMP6	BMP6
ENSGALG00000052643	1.18527	3.95326	6.73431	0.00945759	0.281006	ENSGALG00000052643	ENSGALG00000052643.1	C15orf48	chromosome 15 open reading frame 48 [Source:HGNC Symbol;Acc:HGNC:29898]	10	11117010	11120725	protein_coding	1	C15orf48
ENSGALG00000026153	0.995377	2.72445	6.72539	0.009505	0.281727	ENSGALG00000026153	ENSGALG00000026153.3	FOXO6	forkhead box O6 [Source:NCBI gene;Acc:100857767]	23	1303681	1319424	protein_coding	-1	FOXO6	FOXO6
ENSGALG00000047383	1.38306	3.02519	6.71358	0.00956815	0.282911	ENSGALG00000047383	ENSGALG00000047383.1		WNT1 inducible signaling pathway protein 2 [Source:NCBI gene;Acc:419192]	20	5341388	5346517	protein_coding	-1		WISP2
ENSGALG00000030407	1.24793	2.99575	6.69989	0.00964187	0.2844	ENSGALG00000030407	ENSGALG00000030407.2	IL6R	interleukin 6 receptor [Source:NCBI gene;Acc:693252]	25	2927917	2933482	protein_coding	1		IL6R
ENSGALG00000006757	-1.15222	7.71392	6.68632	0.00971554	0.285881	ENSGALG00000006757	ENSGALG00000006757.6	XYLT1	xylosyltransferase 1 [Source:NCBI gene;Acc:414781]	14	8412741	8686419	protein_coding	1	XYLT1	XYLT1
ENSGALG00000031062	0.788501	5.38942	6.68168	0.00974089	0.285936	ENSGALG00000031062	ENSGALG00000031062.2	BAG5	BCL2 associated athanogene 5 [Source:NCBI gene;Acc:423482]	5	50598446	50603397	protein_coding	-1		BAG5
ENSGALG00000005757	0.698034	5.23249	6.6678	0.009817	0.287398	ENSGALG00000005757	ENSGALG00000005757.6	IRF8	interferon regulatory factor 8 [Source:NCBI gene;Acc:396385]	11	17590414	17597150	protein_coding	-1		IRF8
ENSGALG00000004246	1.45217	1.24965	6.6629	0.00984406	0.287398	ENSGALG00000004246	ENSGALG00000004246.7	SLC6A4	solute carrier family 6 member 4 [Source:NCBI gene;Acc:404747]	19	6349841	6361974	protein_coding	-1		SLC6A4
ENSGALG00000008206	1.22124	0.799946	6.65975	0.00986146	0.287398	ENSGALG00000008206	ENSGALG00000008206.6	TESC	tescalcin [Source:NCBI gene;Acc:771113]	15	11628671	11631426	protein_coding	1		TESC
ENSGALG00000010316	-1.06311	3.40683	6.65228	0.0099029	0.287406	ENSGALG00000010316	ENSGALG00000010316.6		Fraser extracellular matrix complex subunit 1 [Source:NCBI gene;Acc:422506]	4	34756078	34919149	protein_coding	-1		FRAS1
ENSGALG00000002515	-1.46475	4.60469	6.65119	0.00990894	0.287406	ENSGALG00000002515	ENSGALG00000002515.7	OLFM1	olfactomedin 1 [Source:NCBI gene;Acc:395535]	17	7899618	7927026	protein_coding	1		OLFM1
ENSGALG00000050112	-0.851859	4.52057	6.64418	0.00994805	0.287855	ENSGALG00000050112	ENSGALG00000050112.1			5	19367356	19391850	protein_coding	-1
ENSGALG00000038494	0.936069	3.44889	6.63073	0.0100234	0.287979	ENSGALG00000038494	ENSGALG00000038494.2	CMIP	c-Maf inducing protein [Source:NCBI gene;Acc:425774]	11	15556046	15651941	protein_coding	1	CMIP	CMIP
ENSGALG00000036395	1.22171	1.61383	6.62996	0.0100278	0.287979	ENSGALG00000036395	ENSGALG00000036395.3		Ig heavy chain Mem5-like [Source:NCBI gene;Acc:769232]	27	2272709	2649530	protein_coding	-1		LOC769232
ENSGALG00000048671	1.41824	3.90064	6.62788	0.0100395	0.287979	ENSGALG00000048671	ENSGALG00000048671.1		E3 ubiquitin/ISG15 ligase TRIM25-like [Source:NCBI gene;Acc:416147]	13	9077075	9083870	protein_coding	-1		LOC416147
ENSGALG00000035589	1.291	0.788257	6.62282	0.010068	0.287979	ENSGALG00000035589	ENSGALG00000035589.3			19	9178482	9181084	protein_coding	1
ENSGALG00000002840	-1.71222	2.23443	6.62238	0.0100705	0.287979	ENSGALG00000002840	ENSGALG00000002840.6	GRM4	glutamate receptor, metabotropic 4 [Source:NCBI gene;Acc:419906]	26	4440323	4474302	protein_coding	1	GRM4	GRM4
ENSGALG00000042321	0.876259	4.44785	6.60915	0.0101456	0.289214	ENSGALG00000042321	ENSGALG00000042321.2	LYN	LYN proto-oncogene, Src family tyrosine kinase [Source:NCBI gene;Acc:421127]	2	111134283	111181422	protein_coding	1		LYN
ENSGALG00000036747	0.810223	4.4519	6.60642	0.0101612	0.289214	ENSGALG00000036747	ENSGALG00000036747.2		tetratricopeptide repeat domain 31 [Source:NCBI gene;Acc:100858003]	4	90938865	90943532	protein_coding	-1		TTC31
ENSGALG00000008739	0.830143	4.33552	6.59592	0.0102213	0.28977	ENSGALG00000008739	ENSGALG00000008739.6	MINDY3	family with sequence similarity 188 member A [Source:NCBI gene;Acc:420526]	2	20283219	20330243	protein_coding	1	MINDY3	FAM188A
ENSGALG00000027407	1.45902	0.568901	6.5947	0.0102283	0.28977	ENSGALG00000027407	ENSGALG00000027407.3		G protein-coupled receptor 132 [Source:NCBI gene;Acc:100859188]	5	52154934	52170189	protein_coding	-1		GPR132
ENSGALG00000023296	1.06631	6.21873	6.57963	0.0103152	0.291555	ENSGALG00000023296	ENSGALG00000023296.4	TAL1	TAL bHLH transcription factor 1, erythroid differentiation factor [Source:NCBI gene;Acc:396298]	8	22260965	22269319	protein_coding	-1		TAL1
ENSGALG00000004028	-1.65361	7.39288	6.56646	0.0103918	0.292487	ENSGALG00000004028	ENSGALG00000004028.6	MATN4	matrilin 4 [Source:NCBI gene;Acc:428140]	20	5162754	5167745	protein_coding	1	MATN4	MATN4
ENSGALG00000013177	-0.740627	5.01183	6.56571	0.0103962	0.292487	ENSGALG00000013177	ENSGALG00000013177.6	BCAT1	branched chain amino acid transaminase 1 [Source:NCBI gene;Acc:418193]	1	65359495	65418925	protein_coding	1	BCAT1	BCAT1
ENSGALG00000038461	0.931816	3.5845	6.55636	0.010451	0.293351	ENSGALG00000038461	ENSGALG00000038461.3	FECH	ferrochelatase [Source:NCBI gene;Acc:374020]	Z	380895	391872	protein_coding	1		FECH
ENSGALG00000003499	0.794527	3.44003	6.54245	0.010533	0.294972	ENSGALG00000003499	ENSGALG00000003499.7	MAST3	microtubule associated serine/threonine kinase 3 [Source:NCBI gene;Acc:420130]	28	4120115	4138482	protein_coding	-1	MAST3	MAST3
ENSGALG00000015474	1.05311	2.30727	6.52037	0.0106646	0.297973	ENSGALG00000015474	ENSGALG00000015474.6	CD80	CD80 molecule [Source:NCBI gene;Acc:768950]	1	93674849	93698837	protein_coding	1		CD80
ENSGALG00000028142	1.48425	2.00708	6.51552	0.0106937	0.298102	ENSGALG00000028142	ENSGALG00000028142.3	HACD4	3-hydroxyacyl-CoA dehydratase 4 [Source:NCBI gene;Acc:427232]	Z	34263630	34278183	protein_coding	-1	HACD4	HACD4
ENSGALG00000026995	1.18576	1.45566	6.50892	0.0107335	0.298527	ENSGALG00000026995	ENSGALG00000026995.3	RHOG	ras homolog family member G [Source:HGNC Symbol;Acc:HGNC:672]	1	197093201	197097605	protein_coding	-1	RHOG
ENSGALG00000040136	1.19366	2.06342	6.46872	0.010979	0.30466	ENSGALG00000040136	ENSGALG00000040136.3	PSTPIP2	proline-serine-threonine phosphatase interacting protein 2 [Source:NCBI gene;Acc:770399]	Z	2160803	2176161	protein_coding	1	PSTPIP2	PSTPIP2
ENSGALG00000004239	1.13277	2.50688	6.44354	0.0111356	0.308306	ENSGALG00000004239	ENSGALG00000004239.5	IFITM5	interferon induced transmembrane protein 5 [Source:NCBI gene;Acc:422992]	5	1821594	1823163	protein_coding	1		IFITM5
ENSGALG00000011690	-1.01112	5.23356	6.42889	0.0112279	0.308719	ENSGALG00000011690	ENSGALG00000011690.6	CLBA1	chromosome 5 C14orf79 homolog [Source:NCBI gene;Acc:423498]	5	52105547	52113558	protein_coding	1	CLBA1	C5H14orf79
ENSGALG00000016883	0.805032	4.7164	6.4255	0.0112493	0.308719	ENSGALG00000016883	ENSGALG00000016883.6	DOCK9	dedicator of cytokinesis 9 [Source:NCBI gene;Acc:418779]	1	146109887	146227739	protein_coding	1	DOCK9	DOCK9
ENSGALG00000026970	0.860134	8.02907	6.42376	0.0112603	0.308719	ENSGALG00000026970	ENSGALG00000026970.3		interferon-induced transmembrane protein 1-like [Source:NCBI gene;Acc:770612]	5	1814210	1815550	protein_coding	1		LOC770612
ENSGALG00000048236	0.939843	2.41569	6.42133	0.0112757	0.308719	ENSGALG00000048236	ENSGALG00000048236.1			33	6270021	6279764	protein_coding	-1
ENSGALG00000002786	1.13969	2.03869	6.41435	0.0113202	0.308719	ENSGALG00000002786	ENSGALG00000002786.7	PSTPIP1	proline-serine-threonine phosphatase interacting protein 1 [Source:NCBI gene;Acc:415349]	10	3594815	3641597	protein_coding	-1	PSTPIP1	PSTPIP1
ENSGALG00000003039	-0.689582	5.77801	6.41387	0.0113232	0.308719	ENSGALG00000003039	ENSGALG00000003039.6	SRM	spermidine synthase [Source:NCBI gene;Acc:771447]	21	4116739	4124448	protein_coding	-1	SRM	SRM
ENSGALG00000029244	0.587491	4.96497	6.40961	0.0113504	0.308719	ENSGALG00000029244	ENSGALG00000029244.2	SMAP2	small ArfGAP2 [Source:NCBI gene;Acc:419641]	23	5030789	5043661	protein_coding	1		SMAP2
ENSGALG00000040363	0.71478	4.80696	6.40916	0.0113533	0.308719	ENSGALG00000040363	ENSGALG00000040363.3	ABHD4	abhydrolase domain containing 4 [Source:NCBI gene;Acc:420673]	2	40792849	40822455	protein_coding	-1		ABHD4
ENSGALG00000019795	1.01342	3.58819	6.3874	0.0114933	0.31183	ENSGALG00000019795	ENSGALG00000019795.6		uncharacterized LOC100857706 [Source:NCBI gene;Acc:100857706]	18	9875037	9878121	lncRNA	1		LOC100857706
ENSGALG00000046316	1.26678	1.94335	6.38323	0.0115204	0.31187	ENSGALG00000046316	ENSGALG00000046316.2	CFAP97D1	CFAP97 domain containing 1 [Source:HGNC Symbol;Acc:HGNC:37241]	27	5891775	5895085	protein_coding	-1	CFAP97D1
ENSGALG00000012454	1.21544	2.56351	6.37669	0.0115629	0.312267	ENSGALG00000012454	ENSGALG00000012454.4	CYTH4	cytohesin 4 [Source:NCBI gene;Acc:418043]	1	51385635	51405059	protein_coding	-1		CYTH4
ENSGALG00000001446	1.16106	8.77045	6.37309	0.0115863	0.312267	ENSGALG00000001446	ENSGALG00000001446.6	GSN	gelsolin [Source:NCBI gene;Acc:395774]	17	8696510	8723691	protein_coding	1		GSN
ENSGALG00000054170	1.40281	1.29159	6.36556	0.0116357	0.312479	ENSGALG00000054170	ENSGALG00000054170.1			4	10989605	10992696	lncRNA	-1
ENSGALG00000008542	0.88661	6.25386	6.36405	0.0116455	0.312479	ENSGALG00000008542	ENSGALG00000008542.7	ADD3	adducin 3 (gamma) [Source:NCBI gene;Acc:373892]	6	26669740	26768280	protein_coding	1		ADD3
ENSGALG00000012414	-0.684011	5.38274	6.3565	0.0116952	0.313123	ENSGALG00000012414	ENSGALG00000012414.6	GNPNAT1	glucosamine-phosphate N-acetyltransferase 1 [Source:NCBI gene;Acc:423588]	5	58397792	58403918	protein_coding	-1	GNPNAT1	GNPNAT1
ENSGALG00000004958	0.90018	3.06059	6.35142	0.0117287	0.313332	ENSGALG00000004958	ENSGALG00000004958.6	BTK	Bruton tyrosine kinase [Source:NCBI gene;Acc:374075]	4	2028580	2039548	protein_coding	1		BTK
ENSGALG00000003361	1.2341	1.85351	6.33634	0.0118288	0.314722	ENSGALG00000003361	ENSGALG00000003361.5	TREM-B1	triggering receptor expressed on myeloid cells B1 [Source:NCBI gene;Acc:768535]	26	4741023	4747509	protein_coding	-1		TREM-B1
ENSGALG00000012823	0.819657	4.12771	6.3358	0.0118324	0.314722	ENSGALG00000012823	ENSGALG00000012823.7	TRIM24	tripartite motif containing 24 [Source:NCBI gene;Acc:418106]	1	56379268	56436811	protein_coding	-1	TRIM24	TRIM24
ENSGALG00000039728	1.74692	0.350318	6.32673	0.0118931	0.315648	ENSGALG00000039728	ENSGALG00000039728.2	SHOX2	short stature homeobox 2 [Source:NCBI gene;Acc:777244]	9	22759713	22763777	protein_coding	1	SHOX2	SHOX2
ENSGALG00000006425	0.782105	4.68866	6.31021	0.0120045	0.31791	ENSGALG00000006425	ENSGALG00000006425.7	SLC6A6	solute carrier family 6 member 6 [Source:NCBI gene;Acc:416041]	12	11318269	11407020	protein_coding	1		SLC6A6
ENSGALG00000004594	1.19251	9.06461	6.30518	0.0120386	0.318122	ENSGALG00000004594	ENSGALG00000004594.7	CD74	CD74 molecule [Source:NCBI gene;Acc:414741]	13	13851648	13855558	protein_coding	1		CD74
ENSGALG00000007673	-0.677056	6.44488	6.29571	0.0121031	0.319134	ENSGALG00000007673	ENSGALG00000007673.7	LRRC59	leucine rich repeat containing 59 [Source:NCBI gene;Acc:422103]	18	10377416	10381845	protein_coding	1		LRRC59
ENSGALG00000054838	1.65963	0.485006	6.28809	0.0121552	0.319313	ENSGALG00000054838	ENSGALG00000054838.1			30	1334710	1340409	lncRNA	1
ENSGALG00000026313	0.826707	4.38559	6.28705	0.0121623	0.319313	ENSGALG00000026313	ENSGALG00000026313.4	RND3	Rho family GTPase 3 [Source:NCBI gene;Acc:424312]	7	35008798	35022843	protein_coding	-1	RND3	RND3
ENSGALG00000023510	-0.720334	7.60832	6.27577	0.01224	0.320661	ENSGALG00000023510	ENSGALG00000023510.4	ERP29	endoplasmic reticulum protein 29 [Source:NCBI gene;Acc:416882]	15	6557193	6561304	protein_coding	-1		ERP29
ENSGALG00000000242	1.53562	1.19383	6.2714	0.0122702	0.320764	ENSGALG00000000242	ENSGALG00000000242.6	EBF2	early B-cell factor 2 [Source:NCBI gene;Acc:395176]	22	736997	875384	protein_coding	1		EBF2
ENSGALG00000016261	0.988335	3.57614	6.25362	0.012394	0.323305	ENSGALG00000016261	ENSGALG00000016261.6	CYBB	cytochrome b-245 beta chain [Source:NCBI gene;Acc:418581]	1	114457437	114478974	protein_coding	-1		CYBB
ENSGALG00000038355	-0.724449	4.9651	6.22074	0.0126262	0.328044	ENSGALG00000038355	ENSGALG00000038355.2	GDF5	growth differentiation factor 5 [Source:NCBI gene;Acc:374249]	20	1255929	1258984	protein_coding	1		GDF5
ENSGALG00000037065	-0.62959	5.8046	6.22021	0.01263	0.328044	ENSGALG00000037065	ENSGALG00000037065.2	SC5D	sterol-C5-desaturase [Source:NCBI gene;Acc:100857756]	24	3559479	3564721	protein_coding	-1	SC5D	SC5D
ENSGALG00000003527	1.00446	5.31537	6.21245	0.0126855	0.328044	ENSGALG00000003527	ENSGALG00000003527.7	ARRDC2	arrestin domain containing 2 [Source:NCBI gene;Acc:771165]	28	4148246	4156109	protein_coding	-1	ARRDC2	ARRDC2
ENSGALG00000027747	1.08683	2.83882	6.21116	0.0126947	0.328044	ENSGALG00000027747	ENSGALG00000027747.2	TROJANZ	phosphotyrosine phosphatase kappa-like-Z [Source:NCBI gene;Acc:427414]	Z	9025003	9030333	protein_coding	-1		TROJANZ
ENSGALG00000016687	0.972826	2.54296	6.20899	0.0127103	0.328044	ENSGALG00000016687	ENSGALG00000016687.3	P2RY8	purinergic receptor P2Y8 [Source:NCBI gene;Acc:418665]	1	130386938	130414561	protein_coding	1		P2RY8
ENSGALG00000047587	1.34885	1.52243	6.19873	0.0127842	0.329255	ENSGALG00000047587	ENSGALG00000047587.1			30	907175	911760	protein_coding	1
ENSGALG00000016893	-0.746663	6.46717	6.19424	0.0128167	0.329395	ENSGALG00000016893	ENSGALG00000016893.7	UGGT2	UDP-glucose glycoprotein glucosyltransferase 2 [Source:NCBI gene;Acc:418785]	1	147288623	147367495	protein_coding	1		UGGT2
ENSGALG00000050058	0.674644	4.48717	6.15683	0.0130906	0.335347	ENSGALG00000050058	ENSGALG00000050058.1	REEP1	receptor accessory protein 1 [Source:NCBI gene;Acc:771776]	4	85498153	85557858	protein_coding	-1	REEP1	REEP1
ENSGALG00000048091	0.902104	3.82955	6.1551	0.0131033	0.335347	ENSGALG00000048091	ENSGALG00000048091.1		interferon-induced protein 35 [Source:NCBI gene;Acc:420011]	27	7924157	7931121	protein_coding	1		IFI35
ENSGALG00000043036	0.960044	4.90182	6.14732	0.0131611	0.336119	ENSGALG00000043036	ENSGALG00000043036.2	VASH1	vasohibin 1 [Source:NCBI gene;Acc:423369]	5	39074525	39084657	protein_coding	1	VASH1	VASH1
ENSGALG00000016721	1.28861	1.83342	6.13147	0.0132797	0.338437	ENSGALG00000016721	ENSGALG00000016721.5	PLCXD1	phosphatidylinositol specific phospholipase C X domain containing 1 [Source:NCBI gene;Acc:418673]	1	131370527	131395496	protein_coding	-1		PLCXD1
ENSGALG00000000913	-0.830228	7.8181	6.11892	0.0133742	0.339534	ENSGALG00000000913	ENSGALG00000000913.7	CHST6	carbohydrate sulfotransferase 6 [Source:NCBI gene;Acc:770257]	11	19912187	19927726	protein_coding	1		CHST6
ENSGALG00000027232	1.09386	4.22997	6.11836	0.0133785	0.339534	ENSGALG00000027232	ENSGALG00000027232.3	C1QTNF2	C1q and tumor necrosis factor related protein 2 [Source:NCBI gene;Acc:416156]	13	8559183	8566692	protein_coding	1		C1QTNF2
ENSGALG00000047514	1.24427	1.82833	6.11249	0.013423	0.339955	ENSGALG00000047514	ENSGALG00000047514.1			11	10295447	10323465	protein_coding	-1
ENSGALG00000050065	1.11939	0.716146	6.08689	0.0136189	0.344202	ENSGALG00000050065	ENSGALG00000050065.1	CYSLTR2	cysteinyl leukotriene receptor 2 [Source:NCBI gene;Acc:428071]	1	170225814	170235083	protein_coding	1	CYSLTR2	CYSLTR2
ENSGALG00000011551	1.61925	2.69465	6.07632	0.0137006	0.345148	ENSGALG00000011551	ENSGALG00000011551.5	JCHAIN	joining chain of multimeric IgA and IgM [Source:NCBI gene;Acc:374117]	4	50012279	50018146	protein_coding	-1		JCHAIN
ENSGALG00000026884	1.22172	3.74723	6.07472	0.013713	0.345148	ENSGALG00000026884	ENSGALG00000026884.3		phospholipase A2 inhibitor and LY6/PLAUR domain containing [Source:NCBI gene;Acc:426893]	Z	7161279	7165204	protein_coding	-1		PINLYP
ENSGALG00000010583	-1.07294	9.10178	6.06325	0.0138023	0.34668	ENSGALG00000010583	ENSGALG00000010583.6	VIT	vitrin [Source:NCBI gene;Acc:421471]	3	32259901	32302354	protein_coding	-1		VIT
ENSGALG00000040759	-0.940183	8.24853	6.0593	0.0138333	0.346743	ENSGALG00000040759	ENSGALG00000040759.2	CPXM1	carboxypeptidase X, M14 family member 1 [Source:NCBI gene;Acc:100858707]	4	91069174	91078804	protein_coding	-1	CPXM1	CPXM1
ENSGALG00000041858	-1.447	1.0799	6.05439	0.0138718	0.346993	ENSGALG00000041858	ENSGALG00000041858.3		keratin, type I cytoskeletal 42-like [Source:NCBI gene;Acc:100857659]	27	7388618	7391528	protein_coding	-1		LOC100857659
ENSGALG00000015122	1.80599	1.14805	6.04066	0.01398	0.348738	ENSGALG00000015122	ENSGALG00000015122.6	TAF4B	TATA-box binding protein associated factor 4b [Source:NCBI gene;Acc:421086]	2	104150943	104221821	protein_coding	1	TAF4B	TAF4B
ENSGALG00000001392	-0.841946	6.99153	6.0383	0.0139987	0.348738	ENSGALG00000001392	ENSGALG00000001392.7	MMP23B	matrix metallopeptidase 23A (pseudogene) [Source:NCBI gene;Acc:419407]	21	2032641	2041878	protein_coding	-1	MMP23B	MMP23A
ENSGALG00000004610	0.851862	3.61156	6.03225	0.0140468	0.349222	ENSGALG00000004610	ENSGALG00000004610.6	SH2B3	SH2B adaptor protein 3 [Source:NCBI gene;Acc:416876]	15	6404746	6415472	protein_coding	1	SH2B3	SH2B3
ENSGALG00000023472	-0.942148	5.43927	6.02182	0.0141301	0.350526	ENSGALG00000023472	ENSGALG00000023472.4		sulfotransferase family cytosolic 2B member 1-like [Source:NCBI gene;Acc:415852]	11	18746744	18748973	protein_coding	-1		LOC415852
ENSGALG00000039878	0.579017	4.19917	6.01848	0.0141569	0.350526	ENSGALG00000039878	ENSGALG00000039878.2	TFEB	transcription factor EB [Source:NCBI gene;Acc:419922]	26	4925640	4939940	protein_coding	-1		TFEB
ENSGALG00000011872	1.11118	2.20647	6.00621	0.0142556	0.352256	ENSGALG00000011872	ENSGALG00000011872.7		NFAT activating protein with ITAM motif 1 [Source:NCBI gene;Acc:417979]	1	49252184	49267900	protein_coding	1		NFAM1
ENSGALG00000030406	0.713871	4.4558	5.99982	0.0143073	0.352818	ENSGALG00000030406	ENSGALG00000030406.2	CDS2	CDP-diacylglycerol synthase (phosphatidate cytidylyltransferase) 2 [Source:NCBI gene;Acc:419517]	22	459936	478794	protein_coding	-1	CDS2	CDS2
ENSGALG00000041101	1.20482	0.891454	5.99153	0.0143747	0.353763	ENSGALG00000041101	ENSGALG00000041101.2	GALNT6	polypeptide N-acetylgalactosaminyltransferase 6 [Source:NCBI gene;Acc:429501]	33	5048685	5068444	protein_coding	-1		GALNT6
ENSGALG00000028451	0.816859	4.48833	5.97938	0.0144741	0.354535	ENSGALG00000028451	ENSGALG00000028451.3	MT4	metallothionein 4 [Source:NCBI gene;Acc:396212]	11	2118766	2120425	protein_coding	-1		MT4
ENSGALG00000033683	-1.80363	6.5102	5.97908	0.0144765	0.354535	ENSGALG00000033683	ENSGALG00000033683.3	PHOSPHO1	phosphoethanolamine/phosphocholine phosphatase [Source:NCBI gene;Acc:395650]	27	6034509	6040276	protein_coding	1		PHOSPHO1
ENSGALG00000036854	-0.753429	7.10711	5.97504	0.0145097	0.354535	ENSGALG00000036854	ENSGALG00000036854.2	R3HCC1	R3H domain and coiled-coil containing 1 [Source:HGNC Symbol;Acc:HGNC:27329]	22	1387717	1393363	protein_coding	-1	R3HCC1
ENSGALG00000006608	-2.44226	4.99505	5.97349	0.0145225	0.354535	ENSGALG00000006608	ENSGALG00000006608.6		cytosolic 5'-nucleotidase 1A-like [Source:NCBI gene;Acc:770392]	5	14310133	14525237	protein_coding	1		LOC770392
ENSGALG00000007522	0.756803	3.41856	5.96321	0.0146074	0.355894	ENSGALG00000007522	ENSGALG00000007522.6		ATP binding cassette subfamily C member 3 [Source:NCBI gene;Acc:422099]	18	10138422	10181595	protein_coding	-1		ABCC3
ENSGALG00000013747	1.06684	2.44213	5.95542	0.0146721	0.356757	ENSGALG00000013747	ENSGALG00000013747.7	TAGAP	T-cell activation RhoGTPase activating protein [Source:NCBI gene;Acc:421662]	3	52304980	52312768	protein_coding	1	TAGAP	TAGAP
ENSGALG00000011511	-0.737761	6.90881	5.94938	0.0147225	0.357226	ENSGALG00000011511	ENSGALG00000011511.7	CKB	creatine kinase B [Source:NCBI gene;Acc:396248]	5	50513973	50524885	protein_coding	-1		CKB
ENSGALG00000007300	-1.03178	8.05761	5.94608	0.01475	0.357226	ENSGALG00000007300	ENSGALG00000007300.7	PYCR1	pyrroline-5-carboxylate reductase 1 [Source:NCBI gene;Acc:769203]	18	9970057	9973913	protein_coding	-1		PYCR1
ENSGALG00000039811	0.923959	2.68391	5.92045	0.0149661	0.361076	ENSGALG00000039811	ENSGALG00000039811.3	NIPA1	non imprinted in Prader-Willi/Angelman syndrome 1 [Source:NCBI gene;Acc:418681]	1	131761291	131775917	protein_coding	-1	NIPA1	NIPA1
ENSGALG00000006482	0.905877	3.04906	5.9202	0.0149683	0.361076	ENSGALG00000006482	ENSGALG00000006482.6	FAH	fumarylacetoacetate hydrolase [Source:NCBI gene;Acc:415482]	10	13008297	13019135	protein_coding	-1		FAH
ENSGALG00000029632	-0.75747	5.35946	5.9161	0.0150031	0.361202	ENSGALG00000029632	ENSGALG00000029632.2	CHST13	carbohydrate sulfotransferase 13 [Source:NCBI gene;Acc:416032]	12	10860472	10880643	protein_coding	1	CHST13	CHST13
ENSGALG00000003123	0.931673	2.87304	5.88608	0.0152611	0.366687	ENSGALG00000003123	ENSGALG00000003123.6	CNTNAP1	contactin associated protein 1 [Source:NCBI gene;Acc:428309]	27	7823872	7832297	protein_coding	1	CNTNAP1	CNTNAP1
ENSGALG00000007216	-0.781993	4.4921	5.87711	0.015339	0.367834	ENSGALG00000007216	ENSGALG00000007216.7	TVP23A	trans-golgi network vesicle protein 23 homolog A [Source:NCBI gene;Acc:771988]	14	9506852	9516852	protein_coding	1	TVP23A	TVP23A
ENSGALG00000033932	0.974071	8.46637	5.85841	0.0155028	0.371031	ENSGALG00000033932	ENSGALG00000033932.3	BF1	MHC BF1 class I [Source:NCBI gene;Acc:693260]	16	2565405	2595262	protein_coding	1		BF1
ENSGALG00000051072	-1.18434	1.21521	5.84229	0.0156454	0.373711	ENSGALG00000051072	ENSGALG00000051072.1			16	912011	976071	protein_coding	1
ENSGALG00000005448	1.79875	1.90274	5.79919	0.0160336	0.381605	ENSGALG00000005448	ENSGALG00000005448.6	MYL3	myosin, light chain 3, alkali; ventricular, skeletal, slow [Source:NCBI gene;Acc:396067]	2	3512686	3549349	protein_coding	-1		MYL3
ENSGALG00000049241	-1.36811	1.05058	5.79687	0.0160548	0.381605	ENSGALG00000049241	ENSGALG00000049241.1		hair growth associated [Source:NCBI gene;Acc:107049623]	22	80793	89630	protein_coding	1		HR
ENSGALG00000009240	0.695285	6.64071	5.79521	0.0160699	0.381605	ENSGALG00000009240	ENSGALG00000009240.5	NFE2L2	nuclear factor, erythroid 2 like 2 [Source:NCBI gene;Acc:396014]	7	15795206	15819376	protein_coding	1		NFE2L2
ENSGALG00000010595	1.13212	1.51578	5.78874	0.0161291	0.38222	ENSGALG00000010595	ENSGALG00000010595.6	GPR65	G protein-coupled receptor 65 [Source:NCBI gene;Acc:423395]	5	43100745	43106712	protein_coding	1	GPR65	GPR65
ENSGALG00000013916	-0.661336	5.6525	5.78554	0.0161585	0.38222	ENSGALG00000013916	ENSGALG00000013916.6	HYPK	huntingtin interacting protein K [Source:NCBI gene;Acc:770307]	10	20562187	20563224	protein_coding	-1		HYPK
ENSGALG00000002223	-2.46623	2.30216	5.76794	0.0163212	0.38532	ENSGALG00000002223	ENSGALG00000002223.5	LHX9	LIM homeobox 9 [Source:NCBI gene;Acc:396397]	8	2669865	2680557	protein_coding	-1		LHX9
ENSGALG00000017077	0.796433	4.61568	5.76298	0.0163673	0.38566	ENSGALG00000017077	ENSGALG00000017077.6	HSPH1	heat shock protein family H (Hsp110) member 1 [Source:NCBI gene;Acc:418917]	1	176342901	176364943	protein_coding	1		HSPH1
ENSGALG00000034213	0.942854	3.57121	5.7532	0.0164587	0.386616	ENSGALG00000034213	ENSGALG00000034213.2	TNFRSF1B	TNF receptor superfamily member 1B [Source:NCBI gene;Acc:395083]	21	5453941	5467117	protein_coding	-1		TNFRSF1B
ENSGALG00000025886	1.29227	1.60887	5.75158	0.0164738	0.386616	ENSGALG00000025886	ENSGALG00000025886.4	SUSD3	sushi domain containing 3 [Source:NCBI gene;Acc:415988]	12	7057412	7082243	protein_coding	-1	SUSD3	SUSD3
ENSGALG00000027240	1.22858	3.16697	5.74846	0.0165031	0.386616	ENSGALG00000027240	ENSGALG00000027240.4	TSPAN13	tetraspanin 13 [Source:NCBI gene;Acc:420595]	2	28543421	28560768	protein_coding	1		TSPAN13
ENSGALG00000015568	1.53346	1.5373	5.74192	0.0165647	0.387315	ENSGALG00000015568	ENSGALG00000015568.6	SH3TC1	SH3 domain and tetratricopeptide repeats 1 [Source:NCBI gene;Acc:422867]	4	80793977	80825261	protein_coding	1	SH3TC1	SH3TC1
ENSGALG00000033428	0.918117	4.60116	5.72964	0.0166809	0.389267	ENSGALG00000033428	ENSGALG00000033428.2	CA13	carbonic anhydrase 13 [Source:NCBI gene;Acc:100858989]	2	122624567	122638462	protein_coding	1	CA13	CA13
ENSGALG00000016425	-0.559107	4.36813	5.72636	0.0167121	0.389267	ENSGALG00000016425	ENSGALG00000016425.7	IAH1	isoamyl acetate-hydrolyzing esterase 1 homolog [Source:NCBI gene;Acc:421930]	3	96209831	96213156	protein_coding	1		IAH1
ENSGALG00000042215	0.767499	3.3562	5.72145	0.0167589	0.389612	ENSGALG00000042215	ENSGALG00000042215.2	FAAP100	Fanconi anemia core complex associated protein 100 [Source:NCBI gene;Acc:100049617]	18	9174889	9180847	protein_coding	1		FAAP100
ENSGALG00000046794	1.3086	1.57859	5.70547	0.0169121	0.392425	ENSGALG00000046794	ENSGALG00000046794.1			16	2397112	2437757	protein_coding	1
ENSGALG00000038688	-0.950439	4.30411	5.69664	0.0169974	0.393654	ENSGALG00000038688	ENSGALG00000038688.2	ADAMTS17	ADAM metallopeptidase with thrombospondin type 1 motif 17 [Source:NCBI gene;Acc:415515]	10	17545577	17715273	protein_coding	-1	ADAMTS17	ADAMTS17
ENSGALG00000035206	-0.739863	7.63936	5.6801	0.0171584	0.39663	ENSGALG00000035206	ENSGALG00000035206.2		canopy FGF signaling regulator 2 [Source:NCBI gene;Acc:100858933]	33	6953700	6955539	protein_coding	1		CNPY2
ENSGALG00000016473	1.6686	1.14381	5.67415	0.0172166	0.397222	ENSGALG00000016473	ENSGALG00000016473.5	OSR1	odd-skipped related transciption factor 1 [Source:NCBI gene;Acc:100316920]	3	101012220	101014419	protein_coding	-1		OSR1
ENSGALG00000011325	-0.555931	5.28163	5.66007	0.0173554	0.399574	ENSGALG00000011325	ENSGALG00000011325.6	NDUFA12	NADH:ubiquinone oxidoreductase subunit A12 [Source:NCBI gene;Acc:417907]	1	45339203	45346941	protein_coding	-1		NDUFA12
ENSGALG00000007045	1.2068	1.69693	5.65717	0.0173842	0.399574	ENSGALG00000007045	ENSGALG00000007045.6	ADGRA1	adhesion G protein-coupled receptor A1 [Source:NCBI gene;Acc:423825]	6	22597002	22847758	protein_coding	-1	ADGRA1	ADGRA1
ENSGALG00000051101	1.34391	1.43054	5.65174	0.017438	0.400032	ENSGALG00000051101	ENSGALG00000051101.1			23	5959344	6092916	protein_coding	-1
ENSGALG00000038399	1.60869	1.15524	5.64855	0.0174698	0.400032	ENSGALG00000038399	ENSGALG00000038399.2	PLEKHA6	pleckstrin homology domain containing A6 [Source:NCBI gene;Acc:419821]	26	1736524	1776457	protein_coding	-1	PLEKHA6	PLEKHA6
ENSGALG00000030397	1.26537	3.87969	5.64314	0.0175238	0.400287	ENSGALG00000030397	ENSGALG00000030397.2	TRIM27.1	tripartite motif containing 27.1 [Source:NCBI gene;Acc:417042]	16	2513936	2518556	protein_coding	-1		TRIM27.1
ENSGALG00000000868	-0.649326	5.21265	5.64029	0.0175523	0.400287	ENSGALG00000000868	ENSGALG00000000868.6	RNF121	ring finger protein 175 [Source:NCBI gene;Acc:419092]	1	195591204	195602075	protein_coding	-1	RNF121	RNF175
ENSGALG00000027056	0.957262	2.90594	5.63758	0.0175795	0.400287	ENSGALG00000027056	ENSGALG00000027056.3		electron transfer flavoprotein beta subunit lysine methyltransferase [Source:NCBI gene;Acc:418138]	1	59404622	59411011	protein_coding	-1		ETFBKMT
ENSGALG00000000402	-0.963859	8.91446	5.63109	0.0176447	0.401021	ENSGALG00000000402	ENSGALG00000000402.5	LOXL2	lysyl oxidase like 2 [Source:NCBI gene;Acc:419533]	22	1351044	1386815	protein_coding	1		LOXL2
ENSGALG00000008947	1.0521	1.75858	5.62522	0.0177038	0.401615	ENSGALG00000008947	ENSGALG00000008947.6	PAK5	p21 (RAC1) activated kinase 5 [Source:NCBI gene;Acc:416734]	3	13939800	14041253	protein_coding	1		PAK5
ENSGALG00000042587	0.979547	3.76268	5.62197	0.0177367	0.401615	ENSGALG00000042587	ENSGALG00000042587.3		uncharacterized LOC100857928 [Source:NCBI gene;Acc:100857928]	13	17569480	17581193	lncRNA	-1		LOC100857928
ENSGALG00000033758	1.43172	1.52313	5.60472	0.0179121	0.404834	ENSGALG00000033758	ENSGALG00000033758.3			1	119638154	119650880	lncRNA	1
ENSGALG00000049883	1.16042	1.66172	5.59195	0.0180432	0.40704	ENSGALG00000049883	ENSGALG00000049883.1			33	6324924	6330288	lncRNA	-1
ENSGALG00000006973	1.06984	2.49878	5.55613	0.0184161	0.414685	ENSGALG00000006973	ENSGALG00000006973.5	SH2D6	SH2 domain containing 6 [Source:NCBI gene;Acc:395733]	6	22051933	22144236	protein_coding	-1		SH2D6
ENSGALG00000034358	0.876215	4.71345	5.54605	0.0185224	0.415954	ENSGALG00000034358	ENSGALG00000034358.3	RETSAT	retinol saturase [Source:NCBI gene;Acc:426549]	22	5321205	5327645	protein_coding	-1	RETSAT	RETSAT
ENSGALG00000017089	1.06271	3.38819	5.54432	0.0185407	0.415954	ENSGALG00000017089	ENSGALG00000017089.5	SLC46A3	solute carrier family 46 member 3 [Source:NCBI gene;Acc:418924]	1	177111041	177124879	protein_coding	1		SLC46A3
ENSGALG00000005849	1.10405	5.23322	5.54078	0.0185783	0.41603	ENSGALG00000005849	ENSGALG00000005849.5	PPDPF	pancreatic progenitor cell differentiation and proliferation factor [Source:NCBI gene;Acc:419245]	20	9020800	9023108	protein_coding	-1		PPDPF
ENSGALG00000043052	1.07003	2.24611	5.52707	0.0187244	0.418534	ENSGALG00000043052	ENSGALG00000043052.3	CD1B	CD1b molecule [Source:NCBI gene;Acc:425802]	16	2662153	2664893	protein_coding	-1		CD1B
ENSGALG00000026295	-0.717903	3.17453	5.52073	0.0187924	0.419285	ENSGALG00000026295	ENSGALG00000026295.3	CDR2L	cerebellar degeneration related protein 2 like [Source:NCBI gene;Acc:428685]	18	10593558	10607717	protein_coding	1	CDR2L	CDR2L
ENSGALG00000036005	-0.621864	6.13047	5.48391	0.0191923	0.425963	ENSGALG00000036005	ENSGALG00000036005.2	TIAM2	T-cell lymphoma invasion and metastasis 2 [Source:NCBI gene;Acc:421648]	3	50592818	50678098	protein_coding	1		TIAM2
ENSGALG00000033170	-0.592897	5.89368	5.4819	0.0192144	0.425963	ENSGALG00000033170	ENSGALG00000033170.3	GMDS	GDP-mannose 4,6-dehydratase [Source:NCBI gene;Acc:420890]	2	66990175	67383301	protein_coding	-1	GMDS	GMDS
ENSGALG00000001604	-0.70988	4.21099	5.48117	0.0192224	0.425963	ENSGALG00000001604	ENSGALG00000001604.6		galactosidase beta 1 like 2 [Source:NCBI gene;Acc:428238]	24	2597820	2619876	protein_coding	1		GLB1L2
ENSGALG00000012121	-0.78001	7.38397	5.48033	0.0192316	0.425963	ENSGALG00000012121	ENSGALG00000012121.6		reticulocalbin 1 [Source:NCBI gene;Acc:428602]	5	5568465	5575654	protein_coding	1		RCN1
ENSGALG00000048261	0.919346	3.0911	5.46211	0.0194332	0.428899	ENSGALG00000048261	ENSGALG00000048261.1	HES6	translation initiation factor IF-2-like [Source:NCBI gene;Acc:107051857]	9	5640778	5642220	protein_coding	1	HES6	LOC107051857
ENSGALG00000007140	0.812924	5.7953	5.46198	0.0194346	0.428899	ENSGALG00000007140	ENSGALG00000007140.7	NRP1	neuropilin 1 [Source:NCBI gene;Acc:395560]	2	13897935	14004606	protein_coding	1		NRP1
ENSGALG00000013911	0.766084	4.76439	5.44874	0.0195825	0.431381	ENSGALG00000013911	ENSGALG00000013911.6	ZC3HAV1	zinc finger CCCH-type containing, antiviral 1 [Source:NCBI gene;Acc:426315]	1	71375201	71400743	protein_coding	-1		ZC3HAV1
ENSGALG00000010326	-1.0061	5.43724	5.43284	0.0197615	0.433865	ENSGALG00000010326	ENSGALG00000010326.7	FLVCR2	feline leukemia virus subgroup C cellular receptor family member 2 [Source:NCBI gene;Acc:423365]	5	38505542	38536670	protein_coding	1	FLVCR2	FLVCR2
ENSGALG00000023396	-0.592608	5.02001	5.4324	0.0197664	0.433865	ENSGALG00000023396	ENSGALG00000023396.4	ASPHD2	aspartate beta-hydroxylase domain containing 1 [Source:NCBI gene;Acc:425447]	15	7425953	7432354	protein_coding	1	ASPHD2	ASPHD1
ENSGALG00000021031	0.906965	5.63644	5.42893	0.0198058	0.433947	ENSGALG00000021031	ENSGALG00000021031.5	CXCR7	chemokine (C-X-C motif) receptor 7 [Source:NCBI gene;Acc:428997]	7	5066256	5071201	protein_coding	-1		CXCR7
ENSGALG00000013372	1.13899	0.599045	5.42555	0.0198442	0.434006	ENSGALG00000013372	ENSGALG00000013372.6	IL7R	interleukin 7 receptor [Source:NCBI gene;Acc:426054]	Z	10886978	10900701	protein_coding	1		IL7R
ENSGALG00000012190	-1.18059	2.29711	5.41842	0.0199253	0.434481	ENSGALG00000012190	ENSGALG00000012190.6	TMEM163	transmembrane protein 163 [Source:NCBI gene;Acc:424287]	7	30340176	30422024	protein_coding	-1	TMEM163	TMEM163
ENSGALG00000005903	-1.45556	3.17895	5.41739	0.0199372	0.434481	ENSGALG00000005903	ENSGALG00000005903.7	NRIP3	nuclear receptor interacting protein 2 [Source:NCBI gene;Acc:423050]	5	9791730	9802780	protein_coding	1	NRIP3	NRIP2
ENSGALG00000015240	0.659414	4.68484	5.40611	0.0200663	0.43583	ENSGALG00000015240	ENSGALG00000015240.7		coproporphyrinogen oxidase [Source:NCBI gene;Acc:418377]	1	85287225	85295598	protein_coding	-1		CPOX
ENSGALG00000000692	-1.05068	2.35219	5.40574	0.0200707	0.43583	ENSGALG00000000692	ENSGALG00000000692.6	CDK18	cyclin dependent kinase 18 [Source:NCBI gene;Acc:771736]	26	2156870	2171973	protein_coding	1	CDK18	CDK18
ENSGALG00000017186	0.730818	6.74739	5.39266	0.0202216	0.437518	ENSGALG00000017186	ENSGALG00000017186.6	BIRC3	baculoviral IAP repeat containing 3 [Source:NCBI gene;Acc:374012]	1	183926160	183936332	protein_coding	-1		BIRC3
ENSGALG00000012045	-1.14161	1.91551	5.39256	0.0202228	0.437518	ENSGALG00000012045	ENSGALG00000012045.6		solute carrier family 12 member 8 [Source:NCBI gene;Acc:424258]	7	27987357	28007534	protein_coding	-1		SLC12A8
ENSGALG00000010642	0.54587	4.94443	5.38968	0.0202561	0.437518	ENSGALG00000010642	ENSGALG00000010642.7	IRF2	interferon regulatory factor 2 [Source:NCBI gene;Acc:396115]	4	39520122	39561578	protein_coding	1		IRF2
ENSGALG00000021443	-2.7492	6.14174	5.37853	0.020386	0.439544	ENSGALG00000021443	ENSGALG00000021443.5	PANX3	pannexin 3 [Source:NCBI gene;Acc:768736]	24	334541	338653	protein_coding	-1	PANX3	PANX3
ENSGALG00000041010	0.591406	4.92554	5.37461	0.020432	0.439756	ENSGALG00000041010	ENSGALG00000041010.3	WBP1L	WW domain binding protein 1-like [Source:NCBI gene;Acc:423867]	6	24317980	24339647	protein_coding	1	WBP1L	WBP1L
ENSGALG00000040426	0.902488	7.07427	5.35946	0.0206101	0.4417	ENSGALG00000040426	ENSGALG00000040426.3	CREG1	cellular repressor of E1A stimulated genes 1 [Source:NCBI gene;Acc:768680]	1	93005542	93010409	protein_coding	1		CREG1
ENSGALG00000010798	-0.824651	4.53186	5.35906	0.0206149	0.4417	ENSGALG00000010798	ENSGALG00000010798.6	DHCR24	24-dehydrocholesterol reductase [Source:NCBI gene;Acc:424661]	8	25608221	25616427	protein_coding	-1		DHCR24
ENSGALG00000006173	-0.687764	3.49408	5.35522	0.0206604	0.4417	ENSGALG00000006173	ENSGALG00000006173.7	XYLB	xylulokinase [Source:NCBI gene;Acc:420432]	2	6172986	6255970	protein_coding	-1	XYLB	XYLB
ENSGALG00000012462	1.10636	1.15022	5.35463	0.0206673	0.4417	ENSGALG00000012462	ENSGALG00000012462.7	KIF5C	kinesin family member 5C [Source:NCBI gene;Acc:408046]	7	34771501	34839047	protein_coding	1		KIF5C
ENSGALG00000010836	0.983678	3.52465	5.34997	0.0207227	0.441908	ENSGALG00000010836	ENSGALG00000010836.7	AHR	aryl hydrocarbon receptor [Source:NCBI gene;Acc:373907]	2	28740786	28814243	protein_coding	1		AHR
ENSGALG00000016262	1.72575	1.34615	5.3477	0.0207496	0.441908	ENSGALG00000016262	ENSGALG00000016262.6	XK	X-linked Kx blood group [Source:NCBI gene;Acc:427991]	1	114494391	114509421	protein_coding	-1		XK
ENSGALG00000014730	1.17283	1.55769	5.33858	0.0208584	0.443451	ENSGALG00000014730	ENSGALG00000014730.7	ELOVL7	ELOVL fatty acid elongase 7 [Source:NCBI gene;Acc:431579]	Z	18876427	18908652	protein_coding	-1		ELOVL7
ENSGALG00000005499	1.04825	0.783735	5.32858	0.0209785	0.445226	ENSGALG00000005499	ENSGALG00000005499.6	IL17RD	interleukin 17 receptor D [Source:NCBI gene;Acc:395186]	12	8950452	8989422	protein_coding	-1		IL17RD
ENSGALG00000048104	1.07132	0.940529	5.32122	0.0210672	0.446332	ENSGALG00000048104	ENSGALG00000048104.1			7	18822449	18844131	lncRNA	1
ENSGALG00000039228	0.708018	6.8077	5.31765	0.0211105	0.446472	ENSGALG00000039228	ENSGALG00000039228.3	ZFP36L1	ZFP36 ring finger protein like 1 [Source:NCBI gene;Acc:101751828]	5	28553320	28555369	protein_coding	1		ZFP36L1
ENSGALG00000000891	-0.641892	4.14718	5.3145	0.0211486	0.446503	ENSGALG00000000891	ENSGALG00000000891.6	NSUN5	NOP2/Sun RNA methyltransferase family member 5 [Source:NCBI gene;Acc:417462]	19	500330	504124	protein_coding	1	NSUN5	NSUN5
ENSGALG00000009509	-1.00375	1.88577	5.30835	0.0212235	0.447309	ENSGALG00000009509	ENSGALG00000009509.7	CALCR	calcitonin receptor [Source:NCBI gene;Acc:428425]	2	23060807	23197789	protein_coding	-1	CALCR	CALCR
ENSGALG00000005078	0.884913	2.70071	5.30446	0.0212709	0.447534	ENSGALG00000005078	ENSGALG00000005078.6	NUP210	nucleoporin 210 [Source:NCBI gene;Acc:415977]	12	6021285	6080368	protein_coding	-1	NUP210	NUP210
ENSGALG00000046823	1.00887	1.96004	5.29784	0.0213519	0.448464	ENSGALG00000046823	ENSGALG00000046823.1	SNX22	sorting nexin 22 [Source:NCBI gene;Acc:769119]	10	1763961	1765497	protein_coding	-1	SNX22	SNX22
ENSGALG00000026836	-1.00861	9.85881	5.29207	0.0214227	0.449176	ENSGALG00000026836	ENSGALG00000026836.3		collagen type XVI alpha 1 chain [Source:NCBI gene;Acc:430477]	23	5117515	5129007	protein_coding	-1		COL16A1
ENSGALG00000014668	1.51367	0.660879	5.28266	0.0215388	0.450835	ENSGALG00000014668	ENSGALG00000014668.7	MCTP1	multiple C2 and transmembrane domain containing 1 [Source:NCBI gene;Acc:427113]	Z	57735038	57998974	protein_coding	1	MCTP1	MCTP1
ENSGALG00000036219	1.00271	0.979016	5.27784	0.0215985	0.451308	ENSGALG00000036219	ENSGALG00000036219.3	STK35	serine/threonine kinase 35 [Source:NCBI gene;Acc:771724]	20	9768420	9783320	protein_coding	-1	STK35	STK35
ENSGALG00000034500	1.5215	2.16472	5.26606	0.0217451	0.453594	ENSGALG00000034500	ENSGALG00000034500.2	CIDEA	cell death-inducing DFFA-like effector a [Source:NCBI gene;Acc:768659]	2	97261548	97270754	protein_coding	-1		CIDEA
ENSGALG00000042708	-0.947322	1.96653	5.25894	0.0218343	0.454355	ENSGALG00000042708	ENSGALG00000042708.3			16	850033	852546	protein_coding	1
ENSGALG00000016811	0.803747	3.64083	5.25692	0.0218597	0.454355	ENSGALG00000016811	ENSGALG00000016811.6	SEPTIN10	septin 14 [Source:NCBI gene;Acc:418732]	1	138171329	138198192	protein_coding	-1	SEPTIN10	SEPT14
ENSGALG00000028937	-0.561021	4.91856	5.24819	0.0219696	0.454355	ENSGALG00000028937	ENSGALG00000028937.3	TIMM13	translocase of inner mitochondrial membrane 13 [Source:NCBI gene;Acc:100859352]	28	723124	723863	protein_coding	-1		TIMM13
ENSGALG00000035557	-1.1039	5.01034	5.24811	0.0219706	0.454355	ENSGALG00000035557	ENSGALG00000035557.3	BARX1	BARX homeobox 1 [Source:NCBI gene;Acc:374017]	12	6536825	6539305	protein_coding	1		BARX1
ENSGALG00000014684	0.742643	5.59766	5.24627	0.0219939	0.454355	ENSGALG00000014684	ENSGALG00000014684.7	ERAP1	endoplasmic reticulum aminopeptidase 1 [Source:NCBI gene;Acc:427122]	Z	57207629	57222063	protein_coding	1	ERAP1	ERAP1
ENSGALG00000032161	-0.975794	4.37689	5.24052	0.0220667	0.454355	ENSGALG00000032161	ENSGALG00000032161.3	SCUBE2	signal peptide, CUB domain and EGF like domain containing 2 [Source:NCBI gene;Acc:423049]	5	9744885	9778936	protein_coding	1	SCUBE2	SCUBE2
ENSGALG00000040010	1.72596	2.58065	5.23954	0.0220791	0.454355	ENSGALG00000040010	ENSGALG00000040010.3			6	34545736	34558940	lncRNA	1
ENSGALG00000041182	1.27119	1.12307	5.23931	0.022082	0.454355	ENSGALG00000041182	ENSGALG00000041182.3	TBX1	T-box 1 [Source:NCBI gene;Acc:771328]	15	1219854	1227550	protein_coding	1	TBX1	TBX1
ENSGALG00000006756	0.911775	5.48319	5.23653	0.0221173	0.454355	ENSGALG00000006756	ENSGALG00000006756.6		lipopolysaccharide binding protein [Source:NCBI gene;Acc:419293]	20	10341499	10348637	protein_coding	-1		LBP
ENSGALG00000016511	-1.00101	6.69121	5.22757	0.0222316	0.455216	ENSGALG00000016511	ENSGALG00000016511.6	ADGRG2	adhesion G protein-coupled receptor G2 [Source:NCBI gene;Acc:418611]	1	121777765	121819130	protein_coding	1	ADGRG2	ADGRG2
ENSGALG00000003742	-1.09842	10.7936	5.22739	0.0222339	0.455216	ENSGALG00000003742	ENSGALG00000003742.6	CPAMD8	C3 and PZP like, alpha-2-macroglobulin domain containing 8 [Source:NCBI gene;Acc:420138]	28	4313215	4353604	protein_coding	1	CPAMD8	CPAMD8
ENSGALG00000030081	0.557903	4.91863	5.20046	0.0225809	0.461545	ENSGALG00000030081	ENSGALG00000030081.2	SKAP2	src kinase associated phosphoprotein 2 [Source:NCBI gene;Acc:420629]	2	32392815	32502297	protein_coding	-1	SKAP2	SKAP2
ENSGALG00000003162	0.650624	4.65194	5.19026	0.0227138	0.462236	ENSGALG00000003162	ENSGALG00000003162.6		family with sequence similarity 134 member C [Source:NCBI gene;Acc:772215]	27	7795407	7801973	protein_coding	-1		FAM134C
ENSGALG00000012442	1.299	0.95403	5.18923	0.0227273	0.462236	ENSGALG00000012442	ENSGALG00000012442.6	MFNG	MFNG O-fucosylpeptide 3-beta-N-acetylglucosaminyltransferase [Source:NCBI gene;Acc:418042]	1	51255614	51276612	protein_coding	1	MFNG	MFNG
ENSGALG00000048687	0.87235	4.75441	5.18836	0.0227387	0.462236	ENSGALG00000048687	ENSGALG00000048687.1		tetratricopeptide repeat domain 38 [Source:NCBI gene;Acc:426193]	1	71309056	71360005	protein_coding	1		TTC38
ENSGALG00000037050	0.746378	6.0699	5.18536	0.022778	0.462236	ENSGALG00000037050	ENSGALG00000037050.2	FABP3	fatty acid binding protein 3 [Source:NCBI gene;Acc:419557]	23	703621	707046	protein_coding	-1		FABP3
ENSGALG00000008518	1.03342	3.11122	5.18123	0.0228321	0.462236	ENSGALG00000008518	ENSGALG00000008518.7		glutamine synthetase-like [Source:NCBI gene;Acc:417253]	17	2287820	2308533	protein_coding	1		GSL
ENSGALG00000047864	0.954016	2.5682	5.18045	0.0228424	0.462236	ENSGALG00000047864	ENSGALG00000047864.1			5	256620	258240	protein_coding	1
ENSGALG00000003349	1.14401	2.79266	5.16498	0.0230467	0.465597	ENSGALG00000003349	ENSGALG00000003349.5	PLEKHA2	pleckstrin homology domain containing A2 [Source:NCBI gene;Acc:395435]	22	2719080	2729173	protein_coding	1		PLEKHA2
ENSGALG00000032750	-0.947349	3.8865	5.14495	0.0233141	0.469562	ENSGALG00000032750	ENSGALG00000032750.2	CELSR2	cadherin EGF LAG seven-pass G-type receptor 2 [Source:NCBI gene;Acc:430126]	26	1165982	1185894	protein_coding	1	CELSR2	CELSR2
ENSGALG00000028225	-0.705786	5.07071	5.14451	0.0233201	0.469562	ENSGALG00000028225	ENSGALG00000028225.3	SLC17A9	solute carrier family 17 member 9 [Source:NCBI gene;Acc:419236]	20	8441138	8456537	protein_coding	1		SLC17A9
ENSGALG00000042730	-0.690574	7.51017	5.13697	0.0234214	0.470026	ENSGALG00000042730	ENSGALG00000042730.3	STT3A	STT3A, catalytic subunit of the oligosaccharyltransferase complex [Source:NCBI gene;Acc:100857165]	24	409708	417284	protein_coding	-1		STT3A
ENSGALG00000003597	0.755216	6.35899	5.13558	0.0234402	0.470026	ENSGALG00000003597	ENSGALG00000003597.6	AK2	adenylate kinase 2 [Source:NCBI gene;Acc:428227]	23	5470579	5477371	protein_coding	-1	AK2	AK2
ENSGALG00000033507	0.879787	2.60629	5.1342	0.0234589	0.470026	ENSGALG00000033507	ENSGALG00000033507.2	PLCG2	phospholipase C gamma 2 [Source:NCBI gene;Acc:415805]	11	15678088	15728004	protein_coding	1	PLCG2	PLCG2
ENSGALG00000033002	-0.692605	5.72356	5.12559	0.0235756	0.471504	ENSGALG00000033002	ENSGALG00000033002.2	SLC7A3	solute carrier family 7 member 3 [Source:NCBI gene;Acc:422213]	4	2420962	2435623	protein_coding	1	SLC7A3	SLC7A3
ENSGALG00000014236	1.12023	1.69305	5.12305	0.0236101	0.471504	ENSGALG00000014236	ENSGALG00000014236.6	ATP8A1	ATPase phospholipid transporting 8A1 [Source:NCBI gene;Acc:422776]	4	68148034	68237929	protein_coding	1	ATP8A1	ATP8A1
ENSGALG00000006027	1.04871	2.20167	5.11604	0.0237056	0.472517	ENSGALG00000006027	ENSGALG00000006027.7	TM6SF1	transmembrane 6 superfamily member 1 [Source:NCBI gene;Acc:415462]	10	11664716	11683763	protein_coding	1		TM6SF1
ENSGALG00000032145	-0.554737	5.57902	5.10977	0.0237915	0.472517	ENSGALG00000032145	ENSGALG00000032145.2	B4GALT7	beta-1,4-galactosyltransferase 7 [Source:NCBI gene;Acc:416359]	13	10815875	10817473	protein_coding	-1		B4GALT7
ENSGALG00000009693	-0.803874	4.23417	5.10895	0.0238027	0.472517	ENSGALG00000009693	ENSGALG00000009693.7			6	32715646	32724206	protein_coding	-1
ENSGALG00000042589	-0.636557	5.93241	5.10799	0.0238159	0.472517	ENSGALG00000042589	ENSGALG00000042589.2		transmembrane protein 167B [Source:NCBI gene;Acc:771123]	26	1145714	1146845	protein_coding	1		TMEM167B
ENSGALG00000035679	-0.873194	3.05301	5.10368	0.0238751	0.472921	ENSGALG00000035679	ENSGALG00000035679.2	LMO1	LIM domain only 1 (rhombotin 1) [Source:NCBI gene;Acc:100858792]	5	10352793	10399602	protein_coding	1	LMO1	LMO1
ENSGALG00000011715	0.831514	8.92415	5.09472	0.0239987	0.474597	ENSGALG00000011715	ENSGALG00000011715.6	HSPA2	heat shock 70kDa protein 2 [Source:NCBI gene;Acc:423504]	5	53057972	53060373	pseudogene	-1		HSPA2
ENSGALG00000016224	0.849832	5.25805	5.08739	0.0241005	0.474597	ENSGALG00000016224	ENSGALG00000016224.6	MAOA	monoamine oxidase A [Source:NCBI gene;Acc:418563]	1	112604059	112660963	protein_coding	-1		MAOA
ENSGALG00000026284	-0.666696	7.18789	5.08651	0.0241127	0.474597	ENSGALG00000026284	ENSGALG00000026284.2	IKBIP	IKBKB interacting protein [Source:NCBI gene;Acc:417925]	1	46708114	46717148	protein_coding	-1	IKBIP	IKBIP
ENSGALG00000007701	-0.566943	4.96211	5.0863	0.0241155	0.474597	ENSGALG00000007701	ENSGALG00000007701.7	B3GNT7	UDP-GlcNAc:betaGal beta-1,3-N-acetylglucosaminyltransferase 7 [Source:NCBI gene;Acc:424930]	9	15424639	15428284	protein_coding	1	B3GNT7	B3GNT7
ENSGALG00000039320	1.0371	1.68469	5.08295	0.0241622	0.474749	ENSGALG00000039320	ENSGALG00000039320.2	ADGRF5	adhesion G protein-coupled receptor F5 [Source:NCBI gene;Acc:101750527]	3	109877939	109899864	protein_coding	-1	ADGRF5	ADGRF5
ENSGALG00000038187	-0.621279	3.76693	5.07974	0.024207	0.474862	ENSGALG00000038187	ENSGALG00000038187.2	SLC35B4	solute carrier family 35 member B4 [Source:NCBI gene;Acc:416698]	1	1976735	1988947	protein_coding	1	SLC35B4	SLC35B4
ENSGALG00000009723	-0.707699	4.01225	5.07483	0.0242757	0.474908	ENSGALG00000009723	ENSGALG00000009723.6	FMN1	formin 1 [Source:NCBI gene;Acc:386747]	5	30598320	30751690	protein_coding	1		FMN1
ENSGALG00000006229	1.00975	2.02559	5.07229	0.0243113	0.474908	ENSGALG00000006229	ENSGALG00000006229.5		T-lymphocyte surface antigen Ly-9-like [Source:NCBI gene;Acc:100857714]	25	2452489	2458591	protein_coding	-1		LOC100857714
ENSGALG00000002632	0.744521	3.82215	5.06619	0.024397	0.474908	ENSGALG00000002632	ENSGALG00000002632.6	CALCRL	calcitonin receptor like receptor [Source:NCBI gene;Acc:423990]	7	1118003	1183599	protein_coding	1		CALCRL
ENSGALG00000034898	0.971645	3.57859	5.06328	0.024438	0.474908	ENSGALG00000034898	ENSGALG00000034898.3	ITPK1	inositol-tetrakisphosphate 1-kinase [Source:NCBI gene;Acc:423421]	5	45101764	45230310	protein_coding	-1		ITPK1
ENSGALG00000048849	-0.78793	5.81822	5.06255	0.0244482	0.474908	ENSGALG00000048849	ENSGALG00000048849.1	CPXM2	carboxypeptidase X, M14 family member 2 [Source:HGNC Symbol;Acc:HGNC:26977]	6	32711739	32779111	protein_coding	-1	CPXM2
ENSGALG00000047838	-1.22139	1.2717	5.06095	0.0244709	0.474908	ENSGALG00000047838	ENSGALG00000047838.1		immunoglobulin-like receptor [Source:NCBI gene;Acc:425238]	KZ626836.1	729679	843583	protein_coding	-1		LOC425238
ENSGALG00000006723	-0.748416	5.78918	5.06014	0.0244822	0.474908	ENSGALG00000006723	ENSGALG00000006723.7		isopentenyl-diphosphate delta isomerase 2 [Source:NCBI gene;Acc:420459]	2	10454430	10459537	protein_coding	-1		IDI2
ENSGALG00000008676	-0.778883	8.82953	5.05385	0.0245713	0.475339	ENSGALG00000008676	ENSGALG00000008676.6	RRBP1	ribosome binding protein 1 [Source:NCBI gene;Acc:396414]	3	15616824	15644373	protein_coding	1		RRBP1
ENSGALG00000004106	-0.63688	4.72813	5.05037	0.0246207	0.475339	ENSGALG00000004106	ENSGALG00000004106.6	DHCR7	7-dehydrocholesterol reductase [Source:NCBI gene;Acc:422982]	5	1895074	1901741	protein_coding	1		DHCR7
ENSGALG00000043209	-1.20211	1.84761	5.04855	0.0246465	0.475339	ENSGALG00000043209	ENSGALG00000043209.2	ADGRB2	adhesion G protein-coupled receptor B2 [Source:NCBI gene;Acc:426163]	23	5139803	5162948	protein_coding	-1	ADGRB2	ADGRB2
ENSGALG00000013606	1.39742	2.96431	5.04562	0.0246882	0.475339	ENSGALG00000013606	ENSGALG00000013606.6	FGL1	fibrinogen like 1 [Source:NCBI gene;Acc:422728]	4	62853578	62872237	protein_coding	1		FGL1
ENSGALG00000037695	1.61366	2.09379	5.04483	0.0246995	0.475339	ENSGALG00000037695	ENSGALG00000037695.2	OSR2	odd-skipped related transciption factor 2 [Source:NCBI gene;Acc:771523]	2	127712044	127714882	protein_coding	1		OSR2
ENSGALG00000035194	0.931149	2.13115	5.03824	0.0247937	0.476398	ENSGALG00000035194	ENSGALG00000035194.2	ARHGAP25	Rho GTPase activating protein 25 [Source:NCBI gene;Acc:419516]	22	437194	453936	protein_coding	-1		ARHGAP25
ENSGALG00000046747	-2.50933	2.99799	5.03179	0.0248861	0.477192	ENSGALG00000046747	ENSGALG00000046747.1			5	27919541	27925011	lncRNA	-1
ENSGALG00000004930	0.989058	1.8477	5.0299	0.0249133	0.477192	ENSGALG00000004930	ENSGALG00000004930.5	HRH1	histamine receptor H1 [Source:NCBI gene;Acc:100858928]	12	4781954	4783378	protein_coding	1	HRH1	HRH1
ENSGALG00000038467	0.597731	4.67306	5.02448	0.0249914	0.477818	ENSGALG00000038467	ENSGALG00000038467.2	SELENOO	selenoprotein O [Source:NCBI gene;Acc:417745]	1	20448935	20462470	protein_coding	1		SELENOO
ENSGALG00000012577	0.95853	1.20752	5.02219	0.0250244	0.477818	ENSGALG00000012577	ENSGALG00000012577.6	FRMD3	FERM domain containing 3 [Source:NCBI gene;Acc:427452]	Z	39821677	39963817	protein_coding	-1	FRMD3	FRMD3
ENSGALG00000041907	0.98497	1.14364	5.01932	0.025066	0.477863	ENSGALG00000041907	ENSGALG00000041907.2	CDK5R1	cyclin dependent kinase 5 regulatory subunit 1 [Source:NCBI gene;Acc:107055275]	27	3889864	3890766	protein_coding	-1	CDK5R1	CDK5R1
ENSGALG00000014903	-0.686307	4.54211	5.0113	0.0251824	0.478531	ENSGALG00000014903	ENSGALG00000014903.6	ITGA2	integrin subunit alpha 2 [Source:NCBI gene;Acc:100857227]	Z	15862431	15924311	protein_coding	1	ITGA2	ITGA2
ENSGALG00000034591	0.684794	5.77076	5.00928	0.0252117	0.478531	ENSGALG00000034591	ENSGALG00000034591.3		transmembrane protein 14C [Source:NCBI gene;Acc:420851]	2	62112883	62119192	protein_coding	1		TMEM14C
ENSGALG00000037744	1.14608	0.983843	5.00879	0.0252189	0.478531	ENSGALG00000037744	ENSGALG00000037744.2	CACNA1S	calcium voltage-gated channel subunit alpha1 S [Source:NCBI gene;Acc:395985]	26	260153	289532	protein_coding	1		CACNA1S
ENSGALG00000029502	0.630819	6.07083	5.00338	0.0252979	0.479283	ENSGALG00000029502	ENSGALG00000029502.2	CLIC2	chloride intracellular channel 2 [Source:NCBI gene;Acc:422178]	4	1823156	1828005	protein_coding	-1		CLIC2
ENSGALG00000010708	-0.670831	4.72641	4.99233	0.0254599	0.481604	ENSGALG00000010708	ENSGALG00000010708.7	ICA1	islet cell autoantigen 1 [Source:NCBI gene;Acc:420581]	2	24954107	25024569	protein_coding	-1	ICA1	ICA1
ENSGALG00000012481	1.17675	3.41539	4.97386	0.0257332	0.484476	ENSGALG00000012481	ENSGALG00000012481.5	TNFAIP6	TNF alpha induced protein 6 [Source:NCBI gene;Acc:424315]	7	35127799	35141587	protein_coding	1		TNFAIP6
ENSGALG00000016293	0.796066	4.46296	4.97316	0.0257436	0.484476	ENSGALG00000016293	ENSGALG00000016293.5	BMP5	bone morphogenetic protein 5 [Source:NCBI gene;Acc:396053]	3	87360676	87415579	protein_coding	1		BMP5
ENSGALG00000007569	0.728796	4.56809	4.97273	0.0257499	0.484476	ENSGALG00000007569	ENSGALG00000007569.7	KBTBD8	kelch repeat and BTB domain containing 8 [Source:NCBI gene;Acc:416085]	12	15014839	15023143	protein_coding	1	KBTBD8	KBTBD8
ENSGALG00000054784	-0.621544	5.53511	4.97133	0.0257709	0.484476	ENSGALG00000054784	ENSGALG00000054784.1			7	36200377	36205013	protein_coding	1
ENSGALG00000039164	-0.578169	5.0001	4.96683	0.025838	0.48499	ENSGALG00000039164	ENSGALG00000039164.3		paracaspase 3 [Source:NCBI gene;Acc:415336]	10	1382052	1406178	protein_coding	1		PCASP3
ENSGALG00000031397	0.651327	5.05826	4.95648	0.0259931	0.48715	ENSGALG00000031397	ENSGALG00000031397.3	NT5C3A	5'-nucleotidase, cytosolic IIIA [Source:NCBI gene;Acc:395080]	2	47912833	47937133	protein_coding	1		NT5C3A
ENSGALG00000010540	-1.06608	0.450598	4.94538	0.0261605	0.488005	ENSGALG00000010540	ENSGALG00000010540.7	TTC39A	tetratricopeptide repeat domain 39A [Source:NCBI gene;Acc:424632]	8	24366673	24408000	protein_coding	-1	TTC39A	TTC39A
ENSGALG00000002263	0.93327	2.46667	4.9449	0.0261677	0.488005	ENSGALG00000002263	ENSGALG00000002263.6	KLHL6	kelch like family member 6 [Source:NCBI gene;Acc:424762]	9	2728404	2746826	protein_coding	-1		KLHL6
ENSGALG00000005512	0.678139	5.97376	4.94375	0.0261851	0.488005	ENSGALG00000005512	ENSGALG00000005512.5	KIAA1671	KIAA1671 [Source:NCBI gene;Acc:768701]	15	7244600	7280058	protein_coding	1	KIAA1671	KIAA1671
ENSGALG00000010614	1.05112	3.23558	4.94284	0.0261989	0.488005	ENSGALG00000010614	ENSGALG00000010614.5	SLC25A4	solute carrier family 25 member 4 [Source:NCBI gene;Acc:422546]	4	39355762	39358582	protein_coding	-1		SLC25A4
ENSGALG00000036836	-1.52194	1.35419	4.93382	0.026336	0.489085	ENSGALG00000036836	ENSGALG00000036836.2	SOSTDC1	sclerostin domain containing 1 [Source:NCBI gene;Acc:378800]	2	28399735	28403638	protein_coding	-1		SOSTDC1
ENSGALG00000019325	1.56604	0.956542	4.93374	0.0263372	0.489085	ENSGALG00000019325	ENSGALG00000019325.6		uncharacterized LOC417973 [Source:NCBI gene;Acc:417973]	1	49173031	49181295	lncRNA	1		LOC417973
ENSGALG00000013272	1.18516	1.19899	4.93061	0.026385	0.489226	ENSGALG00000013272	ENSGALG00000013272.6	PRMT8	protein arginine methyltransferase 1 [Source:NCBI gene;Acc:425989]	1	74873840	74925413	protein_coding	1	PRMT8	PRMT1
ENSGALG00000025948	-0.951857	2.53842	4.92758	0.0264313	0.489313	ENSGALG00000025948	ENSGALG00000025948.3		Src like adaptor 2 [Source:NCBI gene;Acc:100858750]	20	899945	902370	protein_coding	1		SLA2
ENSGALG00000023546	0.898248	2.55854	4.92505	0.02647	0.489313	ENSGALG00000023546	ENSGALG00000023546.4		NLR family, pyrin domain containing 1-like [Source:NCBI gene;Acc:425015]	9	22401775	22412510	protein_coding	1		NLRP1L
ENSGALG00000016949	0.852487	6.8235	4.91276	0.026659	0.492061	ENSGALG00000016949	ENSGALG00000016949.4	WBP4	WW domain binding protein 4 [Source:NCBI gene;Acc:418829]	1	167168760	167191131	protein_coding	1		WBP4
ENSGALG00000013741	1.20035	1.64137	4.90847	0.0267253	0.492537	ENSGALG00000013741	ENSGALG00000013741.6	SYTL3	synaptotagmin like 3 [Source:NCBI gene;Acc:100858462]	3	52171021	52200623	protein_coding	1	SYTL3	SYTL3
ENSGALG00000041121	0.803098	3.82737	4.89238	0.0269755	0.494694	ENSGALG00000041121	ENSGALG00000041121.2	SLIT2	slit guidance ligand 2 [Source:NCBI gene;Acc:373967]	4	74981753	75225786	protein_coding	-1		SLIT2
ENSGALG00000004250	-0.838159	6.94096	4.88835	0.0270385	0.494694	ENSGALG00000004250	ENSGALG00000004250.7		beta-1,4-N-acetyl-galactosaminyltransferase 4 [Source:NCBI gene;Acc:770601]	5	1794613	1812254	pseudogene	-1		B4GALNT4
ENSGALG00000029142	0.615974	4.99249	4.88496	0.0270917	0.494694	ENSGALG00000029142	ENSGALG00000029142.3		ORMDL sphingolipid biosynthesis regulator 3 [Source:NCBI gene;Acc:426131]	27	7109348	7115931	protein_coding	1		ORMDL3
ENSGALG00000015307	-0.876755	7.83096	4.88405	0.027106	0.494694	ENSGALG00000015307	ENSGALG00000015307.7			1	86150625	86219278	protein_coding	-1
ENSGALG00000007511	0.747929	4.66699	4.88374	0.0271109	0.494694	ENSGALG00000007511	ENSGALG00000007511.4	ITGB2	integrin subunit beta 2 [Source:NCBI gene;Acc:396181]	7	7177686	7189495	protein_coding	-1		ITGB2
ENSGALG00000047792	-0.691305	7.80774	4.88357	0.0271136	0.494694	ENSGALG00000047792	ENSGALG00000047792.1	SELENOM	selenoprotein M [Source:NCBI gene;Acc:101410532]	15	10277542	10278627	protein_coding	-1		SELENOM
ENSGALG00000003588	-1.37016	1.11273	4.88274	0.0271265	0.494694	ENSGALG00000003588	ENSGALG00000003588.6	IRX5	iroquois homeobox 5 [Source:NCBI gene;Acc:770775]	11	4181069	4183523	protein_coding	-1	IRX5	IRX5
ENSGALG00000005476	-1.79379	3.24728	4.87493	0.0272495	0.496194	ENSGALG00000005476	ENSGALG00000005476.6	PTH2R	parathyroid hormone 2 receptor [Source:NCBI gene;Acc:420401]	2	3652705	3758795	protein_coding	1		PTH2R
ENSGALG00000041528	-0.607304	7.17628	4.8708	0.0273149	0.496641	ENSGALG00000041528	ENSGALG00000041528.2	LMF2	lipase maturation factor 2 [Source:NCBI gene;Acc:429380]	1	1284583	1291147	protein_coding	-1		LMF2
ENSGALG00000017319	-0.524105	5.19278	4.86002	0.027486	0.499009	ENSGALG00000017319	ENSGALG00000017319.7	MRPL48	mitochondrial ribosomal protein L48 [Source:NCBI gene;Acc:419062]	1	196140371	196150403	protein_coding	-1		MRPL48
ENSGALG00000044155	0.703291	5.31651	4.8564	0.0275437	0.499312	ENSGALG00000044155	ENSGALG00000044155.2	TMEM140	transmembrane protein 140 [Source:NCBI gene;Acc:417940]	1	47922457	47927316	protein_coding	-1	TMEM140	TMEM140
ENSGALG00000008439	1.24895	4.91314	4.84952	0.0276538	0.499696	ENSGALG00000008439	ENSGALG00000008439.7	CD36	CD36 molecule [Source:NCBI gene;Acc:417730]	1	11333589	11371413	protein_coding	-1		CD36
ENSGALG00000002431	1.26193	6.95675	4.84912	0.0276602	0.499696	ENSGALG00000002431	ENSGALG00000002431.6		complement factor H [Source:NCBI gene;Acc:429057]	8	3040540	3073154	protein_coding	-1		CFH
ENSGALG00000015069	-0.591528	5.82071	4.84713	0.0276922	0.499696	ENSGALG00000015069	ENSGALG00000015069.7	B4GALT4	beta-1,4-galactosyltransferase 4 [Source:NCBI gene;Acc:418341]	1	81391656	81407632	protein_coding	1	B4GALT4	B4GALT4
ENSGALG00000007963	-0.990337	4.29853	4.84414	0.0277402	0.499696	ENSGALG00000007963	ENSGALG00000007963.5	NFATC2	nuclear factor of activated T-cells 2 [Source:NCBI gene;Acc:419346]	20	13171132	13253864	protein_coding	1	NFATC2	NFATC2
ENSGALG00000029264	-1.44767	2.35634	4.83799	0.0278393	0.499696	ENSGALG00000029264	ENSGALG00000029264.2	PI15	peptidase inhibitor 15 [Source:NCBI gene;Acc:374241]	2	118380780	118403137	protein_coding	1		PI15
ENSGALG00000008811	-0.634894	4.23502	4.83797	0.0278397	0.499696	ENSGALG00000008811	ENSGALG00000008811.6	SLC1A4	solute carrier family 1 member 4 [Source:NCBI gene;Acc:769612]	3	10532551	10556800	protein_coding	1	SLC1A4	SLC1A4
ENSGALG00000041685	0.576435	4.05793	4.83539	0.0278813	0.499696	ENSGALG00000041685	ENSGALG00000041685.2	CAPN1	calpain 1 [Source:NCBI gene;Acc:693249]	33	6580953	6593372	protein_coding	-1		CAPN1
ENSGALG00000023542	-2.13986	5.9474	4.82985	0.0279711	0.499696	ENSGALG00000023542	ENSGALG00000023542.4	ALPL	alkaline phosphatase, liver/bone/kidney [Source:NCBI gene;Acc:396317]	21	6603424	6609227	protein_coding	-1		ALPL
ENSGALG00000052326	0.532886	5.30875	4.82948	0.0279771	0.499696	ENSGALG00000052326	ENSGALG00000052326.1	IRF2BP2	interferon regulatory factor 2 binding protein 2 [Source:NCBI gene;Acc:428585]	3	38461706	38464567	protein_coding	1	IRF2BP2	IRF2BP2
ENSGALG00000006054	0.928828	1.11664	4.82924	0.0279809	0.499696	ENSGALG00000006054	ENSGALG00000006054.6	CALCA	calcitonin [Source:NCBI gene;Acc:396256]	5	10769515	10802866	protein_coding	1		CALCA
ENSGALG00000005802	0.655428	4.73215	4.82708	0.0280161	0.499696	ENSGALG00000005802	ENSGALG00000005802.6	FLT4	fms related tyrosine kinase 4 [Source:NCBI gene;Acc:395742]	13	14053033	14099309	protein_coding	1		FLT4
ENSGALG00000003792	1.00442	2.1852	4.81663	0.0281864	0.501998	ENSGALG00000003792	ENSGALG00000003792.6	FYB	FYN binding protein [Source:NCBI gene;Acc:427448]	Z	12272880	12313334	protein_coding	-1		FYB
ENSGALG00000037587	1.15584	2.36319	4.7959	0.0285275	0.507331	ENSGALG00000037587	ENSGALG00000037587.2	ENPP3	ectonucleotide pyrophosphatase/phosphodiesterase 3 [Source:NCBI gene;Acc:426928]	3	57331049	57364433	protein_coding	-1	ENPP3	ENPP3
ENSGALG00000008409	0.764938	5.09243	4.79052	0.0286168	0.507801	ENSGALG00000008409	ENSGALG00000008409.6	GSTO2	glutathione S-transferase omega 2 [Source:NCBI gene;Acc:423881]	6	25196883	25205695	protein_coding	1		GSTO2
ENSGALG00000043607	-0.548337	4.89124	4.78929	0.0286373	0.507801	ENSGALG00000043607	ENSGALG00000043607.2	CENPX	centromere protein X [Source:NCBI gene;Acc:101751277]	18	5003097	5006173	protein_coding	1		CENPX
ENSGALG00000046559	1.07759	1.26477	4.77927	0.0288043	0.510021	ENSGALG00000046559	ENSGALG00000046559.2		programmed cell death 1 [Source:NCBI gene;Acc:424913]	9	15045849	15050281	protein_coding	-1		PDCD1
ENSGALG00000050267	-0.586339	6.28665	4.77214	0.0289239	0.51072	ENSGALG00000050267	ENSGALG00000050267.1	CALU	calumenin-like [Source:NCBI gene;Acc:107050717]	1	813323	831335	protein_coding	1	CALU	LOC107050717
ENSGALG00000044985	0.941278	4.74269	4.76957	0.028967	0.51072	ENSGALG00000044985	ENSGALG00000044985.2		mitotic spindle positioning [Source:NCBI gene;Acc:420097]	28	2865118	2871277	protein_coding	1		MISP
ENSGALG00000009314	0.598476	4.35496	4.76942	0.0289696	0.51072	ENSGALG00000009314	ENSGALG00000009314.5	CACUL1	CDK2 associated cullin domain 1 [Source:NCBI gene;Acc:423926]	6	30764722	30804284	protein_coding	-1		CACUL1
ENSGALG00000015664	0.637253	6.31617	4.75959	0.0291354	0.512901	ENSGALG00000015664	ENSGALG00000015664.7	ADD1	adducin 1 [Source:NCBI gene;Acc:422882]	4	82295739	82352947	protein_coding	-1		ADD1
ENSGALG00000022875	0.958927	6.64565	4.75422	0.0292266	0.513764	ENSGALG00000022875	ENSGALG00000022875.5		myelin oligodendrocyte glycoprotein [Source:NCBI gene;Acc:421050]	2	98074041	98078558	protein_coding	-1		MOG
ENSGALG00000014878	0.592909	4.07698	4.74846	0.0293245	0.514742	ENSGALG00000014878	ENSGALG00000014878.6	MAN1A1	mannosidase alpha class 1A member 1 [Source:NCBI gene;Acc:421726]	3	62548908	62691253	protein_coding	1	MAN1A1	MAN1A1
ENSGALG00000028284	-0.605979	6.61062	4.73567	0.0295433	0.516937	ENSGALG00000028284	ENSGALG00000028284.4	PTX3	pentraxin 3 [Source:NCBI gene;Acc:548626]	9	22868801	22874363	protein_coding	-1		PTX3
ENSGALG00000030125	0.50798	5.31995	4.73424	0.0295678	0.516937	ENSGALG00000030125	ENSGALG00000030125.3	ANKRD10	ankyrin repeat domain 10 [Source:NCBI gene;Acc:418760]	1	140577901	140612165	protein_coding	-1		ANKRD10
ENSGALG00000028186	-0.671576	5.71562	4.73209	0.0296049	0.516937	ENSGALG00000028186	ENSGALG00000028186.4	RERG	RAS like estrogen regulated growth inhibitor [Source:NCBI gene;Acc:418173]	1	62631477	62735236	protein_coding	-1	RERG	RERG
ENSGALG00000029354	1.04193	1.9548	4.73057	0.029631	0.516937	ENSGALG00000029354	ENSGALG00000029354.2	GMIP	GEM interacting protein [Source:NCBI gene;Acc:426010]	30	437446	458592	protein_coding	-1	GMIP	GMIP
ENSGALG00000035060	-0.670958	5.49673	4.72879	0.0296617	0.516937	ENSGALG00000035060	ENSGALG00000035060.2	FKBP11	FK506 binding protein 11 [Source:NCBI gene;Acc:107049506]	33	3412284	3412858	protein_coding	-1	FKBP11	FKBP11
ENSGALG00000016498	1.194	2.58364	4.72602	0.0297095	0.517031	ENSGALG00000016498	ENSGALG00000016498.7	MFSD2B	major facilitator superfamily domain containing 2B [Source:NCBI gene;Acc:428656]	3	104064465	104093730	protein_coding	1	MFSD2B	MFSD2B
ENSGALG00000047988	0.547768	4.46944	4.72099	0.0297966	0.517806	ENSGALG00000047988	ENSGALG00000047988.1			17	7024057	7027504	protein_coding	-1
ENSGALG00000004956	-0.673607	8.29471	4.70643	0.0300499	0.52111	ENSGALG00000004956	ENSGALG00000004956.7	GPI	glucose-6-phosphate isomerase [Source:NCBI gene;Acc:415783]	11	10964811	10986960	protein_coding	1		GPI
ENSGALG00000050931	-0.869289	3.01712	4.70516	0.0300723	0.52111	ENSGALG00000050931	ENSGALG00000050931.1		NAC alpha domain containing [Source:NCBI gene;Acc:420409]	2	4091972	4099771	protein_coding	1		NACAD
ENSGALG00000009686	0.934446	2.37959	4.70166	0.0301335	0.52143	ENSGALG00000009686	ENSGALG00000009686.5	PPP1R9A	protein phosphatase 1 regulatory subunit 9A [Source:NCBI gene;Acc:420568]	2	23715866	23846194	protein_coding	1	PPP1R9A	PPP1R9A
ENSGALG00000038636	0.877045	6.02304	4.69181	0.0303067	0.52242	ENSGALG00000038636	ENSGALG00000038636.3	LAPTM5	lysosomal protein transmembrane 5 [Source:NCBI gene;Acc:419552]	23	380586	395018	protein_coding	-1	LAPTM5	LAPTM5
ENSGALG00000013468	0.986131	2.49586	4.69152	0.0303118	0.52242	ENSGALG00000013468	ENSGALG00000013468.6	TLR3	toll like receptor 3 [Source:NCBI gene;Acc:422720]	4	61315317	61322880	protein_coding	1		TLR3
ENSGALG00000048205	-0.621487	4.7713	4.69109	0.0303194	0.52242	ENSGALG00000048205	ENSGALG00000048205.1		3-beta-hydroxysteroid-Delta(8),Delta(7)-isomerase-like [Source:NCBI gene;Acc:100857622]	30	304787	306703	protein_coding	1		LOC100857622
ENSGALG00000041203	0.92237	1.90431	4.68553	0.0304177	0.523116	ENSGALG00000041203	ENSGALG00000041203.3	CRMP1	collapsin response mediator protein 1 [Source:NCBI gene;Acc:395156]	4	79205107	79249597	protein_coding	-1		CRMP1
ENSGALG00000025796	-0.505102	5.72158	4.68395	0.0304457	0.523116	ENSGALG00000025796	ENSGALG00000025796.3	ADI1	acireductone dioxygenase 1 [Source:NCBI gene;Acc:421918]	3	93689037	93695541	protein_coding	-1		ADI1
ENSGALG00000001410	-1.0068	2.59825	4.6693	0.0307064	0.526757	ENSGALG00000001410	ENSGALG00000001410.5	SPNS3	sphingolipid transporter 3 (putative) [Source:NCBI gene;Acc:417493]	19	3256399	3279042	protein_coding	-1	SPNS3	SPNS3
ENSGALG00000008753	0.640221	3.95477	4.66455	0.0307915	0.526757	ENSGALG00000008753	ENSGALG00000008753.6	FBXO48	F-box protein 48 [Source:NCBI gene;Acc:421265]	3	11966173	11969604	protein_coding	-1	FBXO48	FBXO48
ENSGALG00000002893	-1.19031	5.94234	4.66149	0.0308464	0.526757	ENSGALG00000002893	ENSGALG00000002893.6	STC2	stanniocalcin 2 [Source:NCBI gene;Acc:416208]	13	9947853	9957394	protein_coding	-1	STC2	STC2
ENSGALG00000028016	1.23231	0.311265	4.66005	0.0308724	0.526757	ENSGALG00000028016	ENSGALG00000028016.3		eye-globin [Source:NCBI gene;Acc:417972]	1	49166331	49172940	protein_coding	-1		GBE
ENSGALG00000050240	1.13527	0.612961	4.65997	0.0308738	0.526757	ENSGALG00000050240	ENSGALG00000050240.1	TBX21	T-box 21 [Source:NCBI gene;Acc:100858002]	27	6538026	6545277	protein_coding	-1	TBX21	TBX21
ENSGALG00000017065	-0.888071	6.36505	4.65249	0.0310086	0.528178	ENSGALG00000017065	ENSGALG00000017065.6		StAR related lipid transfer domain containing 13 [Source:NCBI gene;Acc:418908]	1	175547844	175573201	protein_coding	1		STARD13
ENSGALG00000051202	-0.852991	2.08769	4.65054	0.0310438	0.528178	ENSGALG00000051202	ENSGALG00000051202.1		leucine-rich repeat-containing protein 51-like [Source:NCBI gene;Acc:107052453]	1	195622148	195623937	protein_coding	1		LOC107052453
ENSGALG00000029935	-1.29561	0.84072	4.63844	0.0312635	0.531174	ENSGALG00000029935	ENSGALG00000029935.2		erythrocyte membrane protein band 4.1 like 4B [Source:NCBI gene;Acc:420962]	2	84402769	84415948	protein_coding	-1		EPB41L4B
ENSGALG00000023725	0.694911	3.63079	4.63585	0.0313107	0.531235	ENSGALG00000023725	ENSGALG00000023725.4	IER5	immediate early response 5 [Source:NCBI gene;Acc:101750986]	8	6182039	6182746	protein_coding	-1	IER5	IER5
ENSGALG00000002763	-1.1408	11.2452	4.62524	0.0315049	0.533733	ENSGALG00000002763	ENSGALG00000002763.6	FRZB	frizzled related protein [Source:NCBI gene;Acc:395545]	7	2337402	2352802	protein_coding	1		FRZB
ENSGALG00000014811	0.626339	5.38097	4.62303	0.0315455	0.533733	ENSGALG00000014811	ENSGALG00000014811.6	SMCHD1	structural maintenance of chromosomes flexible hinge domain containing 1 [Source:NCBI gene;Acc:421057]	2	101090869	101163136	protein_coding	-1	SMCHD1	SMCHD1
ENSGALG00000002577	-0.88738	2.3354	4.61695	0.0316575	0.534884	ENSGALG00000002577	ENSGALG00000002577.7		StAR related lipid transfer domain containing 10 [Source:NCBI gene;Acc:427615]	13	2709040	2714533	protein_coding	-1		STARD10
ENSGALG00000007220	0.91938	10.9797	4.61314	0.0317279	0.535157	ENSGALG00000007220	ENSGALG00000007220.5	FTH1	ferritin heavy chain 1 [Source:NCBI gene;Acc:395970]	5	16995951	17000513	protein_coding	-1		FTH1
ENSGALG00000032029	0.542398	4.77018	4.6082	0.0318193	0.535157	ENSGALG00000032029	ENSGALG00000032029.3	SRF	serum response factor [Source:NCBI gene;Acc:396103]	3	4420800	4429440	protein_coding	1		SRF
ENSGALG00000015599	1.15461	0.806336	4.60638	0.0318531	0.535157	ENSGALG00000015599	ENSGALG00000015599.5	SOHO-1	sensory organ homeobox protein SOHo [Source:NCBI gene;Acc:396346]	4	81401297	81403526	protein_coding	-1		SOHO-1
ENSGALG00000041926	0.583869	6.63669	4.60035	0.0319655	0.535157	ENSGALG00000041926	ENSGALG00000041926.3	HEXIM1	HEXIM P-TEFb complex subunit 1 [Source:HGNC Symbol;Acc:HGNC:24953]	27	3752626	3757369	protein_coding	1	HEXIM1
ENSGALG00000001845	0.730906	4.08445	4.5993	0.0319851	0.535157	ENSGALG00000001845	ENSGALG00000001845.6	PHTF1	putative homeodomain transcription factor 1 [Source:NCBI gene;Acc:419878]	26	3719029	3730042	protein_coding	-1	PHTF1	PHTF1
ENSGALG00000003313	0.606454	4.19658	4.59786	0.0320118	0.535157	ENSGALG00000003313	ENSGALG00000003313.6		myotubularin related protein 9-like, pseudogene [Source:NCBI gene;Acc:419652]	23	5295424	5299538	protein_coding	1		MTMR9LP
ENSGALG00000003433	0.677028	4.22721	4.59736	0.0320213	0.535157	ENSGALG00000003433	ENSGALG00000003433.6	DPEP2	dipeptidase 2-like [Source:NCBI gene;Acc:107054267]	11	3459157	3474477	protein_coding	1	DPEP2	LOC107054267
ENSGALG00000034078	-0.668249	4.97064	4.59715	0.0320251	0.535157	ENSGALG00000034078	ENSGALG00000034078.3	GLT8D2	glycosyltransferase 8 domain containing 2 [Source:NCBI gene;Acc:418085]	1	54676399	54693423	protein_coding	1		GLT8D2
ENSGALG00000010470	-1.06984	1.74359	4.58978	0.0321631	0.535411	ENSGALG00000010470	ENSGALG00000010470.6	TCERG1L	transcription elongation regulator 1 like [Source:NCBI gene;Acc:423969]	6	35538901	35604326	protein_coding	-1	TCERG1L	TCERG1L
ENSGALG00000032199	0.654758	4.4241	4.58931	0.032172	0.535411	ENSGALG00000032199	ENSGALG00000032199.3	FGR	FGR proto-oncogene, Src family tyrosine kinase [Source:NCBI gene;Acc:777583]	23	2209380	2218299	protein_coding	-1		FGR
ENSGALG00000051401	0.564082	4.14119	4.5865	0.0322247	0.535411	ENSGALG00000051401	ENSGALG00000051401.1	RASIP1	ras-interacting protein 1-like [Source:NCBI gene;Acc:107050411]	22	3612898	3622311	protein_coding	1	RASIP1	LOC107050411
ENSGALG00000010151	-0.557843	5.79299	4.57963	0.0323543	0.535411	ENSGALG00000010151	ENSGALG00000010151.6	CCDC167	coiled-coil domain containing 167 [Source:NCBI gene;Acc:421433]	3	30269956	30278500	protein_coding	1		CCDC167
ENSGALG00000012544	-0.618717	5.27946	4.57725	0.0323991	0.535411	ENSGALG00000012544	ENSGALG00000012544.7			7	36204915	36208072	protein_coding	1
ENSGALG00000052983	-0.755088	4.56841	4.57354	0.0324694	0.535411	ENSGALG00000052983	ENSGALG00000052983.1			33	4661788	4669019	protein_coding	1
ENSGALG00000049181	-0.51254	5.37404	4.5715	0.0325082	0.535411	ENSGALG00000049181	ENSGALG00000049181.1	CHST14	carbohydrate sulfotransferase 14 [Source:HGNC Symbol;Acc:HGNC:24464]	5	1094932	1096321	protein_coding	1	CHST14
ENSGALG00000014501	1.375	3.21895	4.57008	0.032535	0.535411	ENSGALG00000014501	ENSGALG00000014501.3	FGFBP2	fibroblast growth factor binding protein 2 [Source:NCBI gene;Acc:395094]	4	76567092	76569320	protein_coding	1		FGFBP2
ENSGALG00000017050	-1.08053	1.5399	4.56701	0.0325935	0.535411	ENSGALG00000017050	ENSGALG00000017050.6	SMAD9	SMAD family member 9 [Source:NCBI gene;Acc:395543]	1	173759258	173780357	protein_coding	1		SMAD9
ENSGALG00000006421	-1.10172	2.98551	4.56637	0.0326055	0.535411	ENSGALG00000006421	ENSGALG00000006421.7	SLC16A12	solute carrier family 16 member 12 [Source:NCBI gene;Acc:423791]	6	20194880	20203208	protein_coding	-1	SLC16A12	SLC16A12
ENSGALG00000010119	-0.642448	6.57182	4.5656	0.0326203	0.535411	ENSGALG00000010119	ENSGALG00000010119.6	CDKL2	cyclin dependent kinase like 2 [Source:NCBI gene;Acc:428736]	4	34029543	34062799	protein_coding	-1	CDKL2	CDKL2
ENSGALG00000007346	0.715661	5.56516	4.56066	0.0327144	0.535411	ENSGALG00000007346	ENSGALG00000007346.6	JCAD	KIAA1462 [Source:NCBI gene;Acc:420476]	2	14902023	14928738	protein_coding	-1	JCAD	KIAA1462
ENSGALG00000002500	-0.578658	5.27615	4.55983	0.0327304	0.535411	ENSGALG00000002500	ENSGALG00000002500.7	GMPPB	GDP-mannose pyrophosphorylase B [Source:NCBI gene;Acc:415924]	12	2804081	2807450	protein_coding	-1		GMPPB
ENSGALG00000007324	-1.10396	1.0432	4.55928	0.0327408	0.535411	ENSGALG00000007324	ENSGALG00000007324.7	TP63	tumor protein p63 [Source:NCBI gene;Acc:374269]	9	14201848	14296035	protein_coding	-1		TP63
ENSGALG00000010822	-1.04975	0.89174	4.55762	0.0327726	0.535411	ENSGALG00000010822	ENSGALG00000010822.4	SPATA4	spermatogenesis associated 4 [Source:NCBI gene;Acc:422571]	4	44348398	44355142	protein_coding	-1		SPATA4
ENSGALG00000010133	1.10977	4.7771	4.55496	0.0328235	0.535411	ENSGALG00000010133	ENSGALG00000010133.6	PTCH2	patched 2 [Source:NCBI gene;Acc:374187]	8	21151297	21166349	protein_coding	-1	PTCH2	PTCH2
ENSGALG00000043681	0.975384	1.88161	4.55476	0.0328273	0.535411	ENSGALG00000043681	ENSGALG00000043681.3	DAPP1	dual adaptor of phosphotyrosine and 3-phosphoinositides [Source:NCBI gene;Acc:425211]	4	60099126	60121038	protein_coding	1		DAPP1
ENSGALG00000011356	-0.80791	2.9415	4.55455	0.0328314	0.535411	ENSGALG00000011356	ENSGALG00000011356.6		glutamate-rich protein 3 [Source:NCBI gene;Acc:424719]	8	29930523	29974805	protein_coding	-1		ERICH3
ENSGALG00000004189	0.61996	4.02362	4.54263	0.0330608	0.537755	ENSGALG00000004189	ENSGALG00000004189.6	MAFK	MAF bZIP transcription factor K [Source:NCBI gene;Acc:395518]	14	2999628	3008787	protein_coding	1		MAFK
ENSGALG00000016665	-0.61552	6.31091	4.54116	0.0330892	0.537755	ENSGALG00000016665	ENSGALG00000016665.4	FDFT1	farnesyl-diphosphate farnesyltransferase 1 [Source:NCBI gene;Acc:422038]	3	107359160	107370240	protein_coding	1		FDFT1
ENSGALG00000053601	0.860934	1.99541	4.53554	0.033198	0.537755	ENSGALG00000053601	ENSGALG00000053601.1	LPXN	leupaxin [Source:NCBI gene;Acc:423129]	5	17046436	17193688	protein_coding	1	LPXN	LPXN
ENSGALG00000016558	0.817782	4.56995	4.53444	0.0332194	0.537755	ENSGALG00000016558	ENSGALG00000016558.7	VEGFD	vascular endothelial growth factor D [Source:NCBI gene;Acc:395255]	1	123415471	123448479	protein_coding	1		VEGFD
ENSGALG00000011623	-0.571102	7.09694	4.53125	0.0332813	0.537755	ENSGALG00000011623	ENSGALG00000011623.5	ADAMTS3	ADAM metallopeptidase with thrombospondin type 1 motif 3 [Source:NCBI gene;Acc:428760]	4	50473922	50604585	protein_coding	-1	ADAMTS3	ADAMTS3
ENSGALG00000038152	-0.554349	4.05065	4.53119	0.0332824	0.537755	ENSGALG00000038152	ENSGALG00000038152.2	ABCC6	ATP binding cassette subfamily C member 6 [Source:NCBI gene;Acc:416600]	14	8092682	8116502	protein_coding	-1		ABCC6
ENSGALG00000009512	0.930351	7.1827	4.53111	0.0332841	0.537755	ENSGALG00000009512	ENSGALG00000009512.6	TFPI2	tissue factor pathway inhibitor 2 [Source:NCBI gene;Acc:420561]	2	23301645	23311143	protein_coding	-1	TFPI2	TFPI2
ENSGALG00000042289	-0.673175	6.87424	4.51989	0.0335029	0.539945	ENSGALG00000042289	ENSGALG00000042289.3	SUSD5	sushi domain containing 5 [Source:NCBI gene;Acc:420721]	2	44446651	44489221	protein_coding	-1	SUSD5	SUSD5
ENSGALG00000011541	0.858751	3.96487	4.51962	0.0335083	0.539945	ENSGALG00000011541	ENSGALG00000011541.6	BIN1	bridging integrator 1 [Source:NCBI gene;Acc:424228]	7	23682689	23766446	protein_coding	1		BIN1
ENSGALG00000017272	0.791684	7.00588	4.51502	0.0335984	0.540389	ENSGALG00000017272	ENSGALG00000017272.7	VWF	von Willebrand factor [Source:NCBI gene;Acc:419031]	1	74541146	74683073	protein_coding	-1		VWF
ENSGALG00000034344	-0.737336	4.76163	4.51369	0.0336246	0.540389	ENSGALG00000034344	ENSGALG00000034344.3	MTHFD2	methylenetetrahydrofolate dehydrogenase (NADP+ dependent) 2, methenyltetrahydrofolate cyclohydrolase [Source:NCBI gene;Acc:426126]	22	3867465	3874049	protein_coding	1		MTHFD2
ENSGALG00000008141	1.60215	1.47912	4.50583	0.0337795	0.542164	ENSGALG00000008141	ENSGALG00000008141.6			4	13903972	13924666	protein_coding	-1
ENSGALG00000007867	-0.895129	3.08061	4.50104	0.0338742	0.542968	ENSGALG00000007867	ENSGALG00000007867.8	SLC9A5	solute carrier family 9 member A5 [Source:NCBI gene;Acc:425403]	11	1334504	1345280	protein_coding	-1	SLC9A5	SLC9A5
ENSGALG00000027440	-0.586089	4.22362	4.49784	0.0339378	0.543272	ENSGALG00000027440	ENSGALG00000027440.3	COX20	COX20, cytochrome c oxidase assembly factor [Source:NCBI gene;Acc:421493]	3	34801117	34805212	protein_coding	-1		COX20
ENSGALG00000033631	0.668886	3.67118	4.4945	0.034004	0.543321	ENSGALG00000033631	ENSGALG00000033631.3	MYC	v-myc avian myelocytomatosis viral oncogene homolog [Source:NCBI gene;Acc:420332]	2	139734098	139738744	protein_coding	1		MYC
ENSGALG00000012308	-0.583156	5.58483	4.49125	0.0340688	0.543321	ENSGALG00000012308	ENSGALG00000012308.6	MANBA	mannosidase beta [Source:NCBI gene;Acc:422712]	4	60851437	60898854	protein_coding	-1	MANBA	MANBA
ENSGALG00000006402	0.95123	1.58411	4.49027	0.0340884	0.543321	ENSGALG00000006402	ENSGALG00000006402.6	NRROS	negative regulator of reactive oxygen species [Source:NCBI gene;Acc:424857]	9	4855404	4859977	protein_coding	-1	NRROS	NRROS
ENSGALG00000053700	1.24129	1.51975	4.48872	0.0341193	0.543321	ENSGALG00000053700	ENSGALG00000053700.1			2	35988322	36199426	lncRNA	1
ENSGALG00000016351	0.510439	5.58344	4.4665	0.0345658	0.549714	ENSGALG00000016351	ENSGALG00000016351.6	ACOT9	acyl-CoA thioesterase 9 [Source:NCBI gene;Acc:418600]	1	119754033	119774891	protein_coding	1		ACOT9
ENSGALG00000030025	1.56992	7.20621	4.45682	0.0347622	0.551854	ENSGALG00000030025	ENSGALG00000030025.2	FABP4	fatty acid binding protein 4 [Source:NCBI gene;Acc:374165]	2	121349992	121353429	protein_coding	-1		FABP4
ENSGALG00000002016	-0.591618	5.2036	4.4554	0.034791	0.551854	ENSGALG00000002016	ENSGALG00000002016.6	PRKCD	protein kinase C delta [Source:NCBI gene;Acc:415905]	12	1720584	1784240	protein_coding	1		PRKCD
ENSGALG00000026902	-0.805184	3.67574	4.45008	0.0348997	0.552083	ENSGALG00000026902	ENSGALG00000026902.3	P2RX6	purinergic receptor P2X 6 [Source:NCBI gene;Acc:429367]	15	10350984	10356368	protein_coding	-1	P2RX6	P2RX6
ENSGALG00000032713	-0.796318	2.06923	4.44817	0.0349387	0.552083	ENSGALG00000032713	ENSGALG00000032713.2	FOXA1	forkhead box A1 [Source:NCBI gene;Acc:101752179]	5	37377807	37382222	protein_coding	-1	FOXA1	FOXA1
ENSGALG00000002816	0.512722	5.43405	4.44804	0.0349414	0.552083	ENSGALG00000002816	ENSGALG00000002816.6	STK10	serine/threonine kinase 10 [Source:NCBI gene;Acc:416204]	13	9525284	9568153	protein_coding	1		STK10
ENSGALG00000008681	-0.7505	3.70002	4.44527	0.0349981	0.552262	ENSGALG00000008681	ENSGALG00000008681.6	NSMF	NMDA receptor synaptonuclear signaling and neuronal migration factor [Source:NCBI gene;Acc:417260]	17	2092280	2126139	protein_coding	1	NSMF	NSMF
ENSGALG00000026426	0.709266	5.23514	4.44103	0.0350852	0.55292	ENSGALG00000026426	ENSGALG00000026426.4			2	17356029	17357165	pseudogene	-1
ENSGALG00000008393	-0.755075	6.21139	4.4386	0.0351351	0.552992	ENSGALG00000008393	ENSGALG00000008393.4	CREB3L1	cAMP responsive element binding protein 3 like 1 [Source:NCBI gene;Acc:100859610]	5	23934630	23975322	protein_coding	-1	CREB3L1	CREB3L1
ENSGALG00000026945	2.47421	2.06433	4.43386	0.0352327	0.553813	ENSGALG00000026945	ENSGALG00000026945.3	CIDEC	cell death inducing DFFA like effector c [Source:NCBI gene;Acc:100859733]	11	18370500	18371801	protein_coding	-1		CIDEC
ENSGALG00000011309	1.00196	2.95881	4.43143	0.0352829	0.553887	ENSGALG00000011309	ENSGALG00000011309.6	PLXNC1	plexin C1 [Source:NCBI gene;Acc:417901]	1	45094960	45161493	protein_coding	1	PLXNC1	PLXNC1
ENSGALG00000009792	-0.636659	4.21554	4.41955	0.0355295	0.556348	ENSGALG00000009792	ENSGALG00000009792.6		uncharacterized LOC422442 [Source:NCBI gene;Acc:422442]	4	29323991	29326742	protein_coding	-1		LOC422442
ENSGALG00000016834	0.898687	3.93113	4.41794	0.0355629	0.556348	ENSGALG00000016834	ENSGALG00000016834.6	MCF2L	MCF.2 cell line derived transforming sequence like [Source:NCBI gene;Acc:418748]	1	138951176	139094938	protein_coding	-1		MCF2L
ENSGALG00000014723	0.509991	4.43651	4.41594	0.0356046	0.556348	ENSGALG00000014723	ENSGALG00000014723.5	GABARAPL1	GABA type A receptor associated protein like 1 [Source:NCBI gene;Acc:769118]	1	79147794	79157641	protein_coding	-1	GABARAPL1	GABARAPL1
ENSGALG00000005662	0.820509	3.19237	4.41509	0.0356224	0.556348	ENSGALG00000005662	ENSGALG00000005662.5	AMPD3	adenosine monophosphate deaminase 3 [Source:NCBI gene;Acc:423041]	5	9179063	9204672	protein_coding	-1		AMPD3
ENSGALG00000016357	-0.681347	8.57335	4.40984	0.0357321	0.556723	ENSGALG00000016357	ENSGALG00000016357.7	PRDX4	peroxiredoxin 4 [Source:NCBI gene;Acc:418601]	1	119778665	119787144	protein_coding	-1	PRDX4	PRDX4
ENSGALG00000003103	1.11601	1.40204	4.40958	0.0357377	0.556723	ENSGALG00000003103	ENSGALG00000003103.7	MST1R	macrophage stimulating 1 receptor [Source:NCBI gene;Acc:427573]	12	3002525	3009824	protein_coding	-1		MST1R
ENSGALG00000007098	-0.618196	5.97952	4.39854	0.0359697	0.559621	ENSGALG00000007098	ENSGALG00000007098.6	KIF21A	kinesin family member 21A [Source:NCBI gene;Acc:417692]	1	15477557	15560977	protein_coding	1	KIF21A	KIF21A
ENSGALG00000001603	0.59076	5.32215	4.39395	0.0360666	0.560412	ENSGALG00000001603	ENSGALG00000001603.6	NARF	nuclear prelamin A recognition factor [Source:NCBI gene;Acc:417341]	18	3478570	3492518	protein_coding	-1	NARF	NARF
ENSGALG00000012421	1.11575	1.84395	4.39113	0.0361263	0.560624	ENSGALG00000012421	ENSGALG00000012421.7	ARHGAP15	Rho GTPase activating protein 15 [Source:NCBI gene;Acc:424303]	7	32698930	33027332	protein_coding	1		ARHGAP15
ENSGALG00000007515	1.28891	6.14461	4.38542	0.0362476	0.561059	ENSGALG00000007515	ENSGALG00000007515.6	SFRP5	secreted frizzled related protein 5 [Source:NCBI gene;Acc:423838]	6	23251548	23253727	protein_coding	1		SFRP5
ENSGALG00000038710	-0.618614	4.86492	4.38444	0.0362683	0.561059	ENSGALG00000038710	ENSGALG00000038710.2	MANSC1	MANSC domain containing 1 [Source:NCBI gene;Acc:426428]	1	71797826	71804003	protein_coding	-1		MANSC1
ENSGALG00000051765	0.52176	5.76784	4.38331	0.0362925	0.561059	ENSGALG00000051765	ENSGALG00000051765.1			2	130623803	130629152	protein_coding	1
ENSGALG00000040672	1.06533	6.16178	4.38014	0.0363601	0.561087	ENSGALG00000040672	ENSGALG00000040672.2	IGFBP4	insulin like growth factor binding protein 4 [Source:NCBI gene;Acc:374271]	27	7262040	7267335	protein_coding	1		IGFBP4
ENSGALG00000008465	-1.36991	3.25679	4.37891	0.0363863	0.561087	ENSGALG00000008465	ENSGALG00000008465.6	SORCS1	sortilin related VPS10 domain containing receptor 1 [Source:NCBI gene;Acc:423885]	6	26083271	26356014	protein_coding	-1	SORCS1	SORCS1
ENSGALG00000000978	-0.476414	4.99259	4.37096	0.0365564	0.562996	ENSGALG00000000978	ENSGALG00000000978.7	CEP104	centrosomal protein 104 [Source:NCBI gene;Acc:419379]	21	923773	935424	protein_coding	1	CEP104	CEP104
ENSGALG00000002379	-0.517531	5.7464	4.36575	0.0366683	0.564007	ENSGALG00000002379	ENSGALG00000002379.7	MRPS17	mitochondrial ribosomal protein S17 [Source:NCBI gene;Acc:417538]	19	4998829	5001580	protein_coding	1		MRPS17
ENSGALG00000009748	-0.640532	6.58586	4.36213	0.0367463	0.564493	ENSGALG00000009748	ENSGALG00000009748.7	ASNS	asparagine synthetase (glutamine-hydrolyzing) [Source:NCBI gene;Acc:420574]	2	24662430	24676154	protein_coding	-1		ASNS
ENSGALG00000009082	-0.644006	6.59924	4.34715	0.0370709	0.568646	ENSGALG00000009082	ENSGALG00000009082.6	COQ8A	coenzyme Q8A [Source:NCBI gene;Acc:416745]	3	12555719	12587558	protein_coding	-1		COQ8A
ENSGALG00000041577	0.799145	3.50757	4.34536	0.03711	0.568646	ENSGALG00000041577	ENSGALG00000041577.2	ITGA4	integrin subunit alpha 4 [Source:NCBI gene;Acc:424121]	7	14320204	14351730	protein_coding	-1	ITGA4	ITGA4
ENSGALG00000045511	0.790728	4.50374	4.34201	0.037183	0.569049	ENSGALG00000045511	ENSGALG00000045511.2	PARP9	poly(ADP-ribose) polymerase family member 9 [Source:NCBI gene;Acc:424269]	7	28261411	28270003	protein_coding	1	PARP9	PARP9
ENSGALG00000030112	-0.496618	4.42624	4.33302	0.0373799	0.571329	ENSGALG00000030112	ENSGALG00000030112.2		aspartate beta-hydroxylase [Source:HGNC Symbol;Acc:HGNC:757]	2	113285505	113316802	protein_coding	-1
ENSGALG00000006217	-1.29178	1.29382	4.32974	0.0374519	0.571329	ENSGALG00000006217	ENSGALG00000006217.7	S100B	S100 calcium binding protein B [Source:NCBI gene;Acc:424038]	7	6928671	6931688	protein_coding	1		S100B
ENSGALG00000001231	0.601177	3.95051	4.32636	0.0375265	0.571329	ENSGALG00000001231	ENSGALG00000001231.5	SAMHD1	SAM and HD domain containing deoxynucleoside triphosphate triphosphohydrolase 1 [Source:NCBI gene;Acc:419125]	20	630016	655765	protein_coding	-1		SAMHD1
ENSGALG00000017558	-0.714677	4.8902	4.32214	0.0376195	0.571329	ENSGALG00000017558	ENSGALG00000017558.7		uncharacterized LOC768709 [Source:NCBI gene;Acc:768709]	Z	81801034	81807114	protein_coding	1		LOC768709
ENSGALG00000004227	-0.510268	6.14379	4.32185	0.0376259	0.571329	ENSGALG00000004227	ENSGALG00000004227.3	FAM20B	FAM20B, glycosaminoglycan xylosylkinase [Source:NCBI gene;Acc:424427]	8	6632962	6649915	protein_coding	-1		FAM20B
ENSGALG00000049424	0.869345	2.76147	4.31701	0.0377331	0.571329	ENSGALG00000049424	ENSGALG00000049424.1			1	194696833	194698283	lncRNA	-1
ENSGALG00000034868	0.970758	2.22119	4.31556	0.0377653	0.571329	ENSGALG00000034868	ENSGALG00000034868.3	KRT7	keratin 7 [Source:NCBI gene;Acc:395772]	33	5216371	5226040	protein_coding	1		KRT7
ENSGALG00000014978	0.799118	4.58808	4.31437	0.0377918	0.571329	ENSGALG00000014978	ENSGALG00000014978.6	IQGAP2	IQ motif containing GTPase activating protein 2 [Source:NCBI gene;Acc:427211]	Z	23461532	23577608	protein_coding	-1		IQGAP2
ENSGALG00000006857	0.476649	4.83622	4.31346	0.037812	0.571329	ENSGALG00000006857	ENSGALG00000006857.6	SPATA20	spermatogenesis associated 20 [Source:NCBI gene;Acc:422100]	18	10304635	10313512	protein_coding	-1	SPATA20	SPATA20
ENSGALG00000025764	-0.713821	8.58198	4.30828	0.0379273	0.571329	ENSGALG00000025764	ENSGALG00000025764.3	FKBP10	FK506 binding protein 10 [Source:NCBI gene;Acc:427013]	27	7499025	7504478	protein_coding	1	FKBP10	FKBP10
ENSGALG00000013408	-0.523646	6.65417	4.3073	0.0379492	0.571329	ENSGALG00000013408	ENSGALG00000013408.6	TMF1	TATA element modulatory factor 1 [Source:NCBI gene;Acc:426072]	12	15693136	15706614	protein_coding	-1	TMF1	TMF1
ENSGALG00000048562	1.14031	0.863632	4.30648	0.0379675	0.571329	ENSGALG00000048562	ENSGALG00000048562.1		leukocyte immunoglobulin-like receptor subfamily A member 2 [Source:NCBI gene;Acc:112531107]	31	3705574	3707691	protein_coding	-1		LOC112531107
ENSGALG00000030808	-0.489855	4.75881	4.30438	0.0380144	0.571329	ENSGALG00000030808	ENSGALG00000030808.3		polymerase (RNA) II (DNA directed) polypeptide J, 13.3kDa [Source:NCBI gene;Acc:107049063]	19	4315220	4316601	protein_coding	-1		POLR2J
ENSGALG00000036751	-0.830207	2.35117	4.30185	0.0380709	0.571329	ENSGALG00000036751	ENSGALG00000036751.3			14	16007197	16010781	protein_coding	1
ENSGALG00000034821	-0.742396	8.00051	4.30172	0.0380739	0.571329	ENSGALG00000034821	ENSGALG00000034821.3	LMAN1L	lectin, mannose binding 1 like [Source:NCBI gene;Acc:426849]	Z	943082	962645	protein_coding	-1		LMAN1L
ENSGALG00000005553	1.27178	1.10869	4.30134	0.0380823	0.571329	ENSGALG00000005553	ENSGALG00000005553.6	NLGN3	neuroligin 3 [Source:NCBI gene;Acc:770104]	4	2322335	2351352	protein_coding	-1		NLGN3
ENSGALG00000006677	-0.6849	7.64553	4.29285	0.0382729	0.572434	ENSGALG00000006677	ENSGALG00000006677.6	P4HA2	prolyl 4-hydroxylase subunit alpha 2 [Source:NCBI gene;Acc:416326]	13	17442199	17465935	protein_coding	-1		P4HA2
ENSGALG00000050908	-0.943843	0.35169	4.29101	0.0383145	0.572434	ENSGALG00000050908	ENSGALG00000050908.1			28	534868	553560	lncRNA	-1
ENSGALG00000005206	-0.577784	4.79568	4.28906	0.0383583	0.572434	ENSGALG00000005206	ENSGALG00000005206.6	ACSL3	acyl-CoA synthetase long chain family member 3 [Source:NCBI gene;Acc:424810]	9	8222654	8263172	protein_coding	1	ACSL3	ACSL3
ENSGALG00000021017	1.26915	2.87312	4.28868	0.0383669	0.572434	ENSGALG00000021017	ENSGALG00000021017.5	DUSP15	dual specificity phosphatase 15 [Source:NCBI gene;Acc:419277]	20	10068977	10076375	protein_coding	-1	DUSP15	DUSP15
ENSGALG00000036300	-0.521039	5.79794	4.28762	0.0383909	0.572434	ENSGALG00000036300	ENSGALG00000036300.3	SEC61A2	Sec61 translocon alpha 2 subunit [Source:NCBI gene;Acc:426369]	1	6834525	6850141	protein_coding	1		SEC61A2
ENSGALG00000005725	0.836923	6.36323	4.27965	0.0385712	0.573133	ENSGALG00000005725	ENSGALG00000005725.7	CSF1R	colony stimulating factor 1 receptor [Source:NCBI gene;Acc:396406]	13	13980059	13997910	protein_coding	1		CSF1R
ENSGALG00000023818	0.644554	4.26629	4.27937	0.0385776	0.573133	ENSGALG00000023818	ENSGALG00000023818.5	HSPB9	heat shock protein family B (small) member 9 [Source:NCBI gene;Acc:428310]	27	7654604	7655550	pseudogene	1		HSPB9
ENSGALG00000015630	-0.712941	4.71663	4.27798	0.0386091	0.573133	ENSGALG00000015630	ENSGALG00000015630.6	EDIL3	EGF like repeats and discoidin domains 3 [Source:NCBI gene;Acc:427326]	Z	62363362	62692551	protein_coding	1	EDIL3	EDIL3
ENSGALG00000008734	1.25314	0.843877	4.27724	0.038626	0.573133	ENSGALG00000008734	ENSGALG00000008734.6	PCSK2	proprotein convertase subtilisin/kexin type 2 [Source:NCBI gene;Acc:395136]	3	12111551	12286838	protein_coding	-1	PCSK2	PCSK2
ENSGALG00000038292	-0.632631	6.22347	4.27008	0.0387891	0.574804	ENSGALG00000038292	ENSGALG00000038292.3	TMEM258	transmembrane protein 258 [Source:NCBI gene;Acc:422964]	5	485844	487737	protein_coding	-1		TMEM258
ENSGALG00000006644	1.37353	1.31834	4.26816	0.038833	0.574804	ENSGALG00000006644	ENSGALG00000006644.6		acyl-CoA synthetase long-chain family member 6 [Source:NCBI gene;Acc:416324]	13	17366433	17385594	protein_coding	-1		ACSL6
ENSGALG00000013569	-0.673351	7.77722	4.26359	0.0389375	0.574892	ENSGALG00000013569	ENSGALG00000013569.6	SEC61B	Sec61 translocon beta subunit [Source:NCBI gene;Acc:420997]	2	89693065	89697358	protein_coding	-1		SEC61B
ENSGALG00000040724	-0.694519	7.43382	4.26145	0.0389867	0.574892	ENSGALG00000040724	ENSGALG00000040724.2	AKAP9	A-kinase anchoring protein 9 [Source:NCBI gene;Acc:395695]	2	22394327	22493500	protein_coding	1		AKAP9
ENSGALG00000034948	-0.551738	6.2942	4.25942	0.0390333	0.574892	ENSGALG00000034948	ENSGALG00000034948.2	UAP1L1	UDP-N-acetylglucosamine pyrophosphorylase 1 like 1 [Source:NCBI gene;Acc:417295]	17	719281	734578	protein_coding	-1	UAP1L1	UAP1L1
ENSGALG00000051496	-1.02814	2.08619	4.25758	0.0390755	0.574892	ENSGALG00000051496	ENSGALG00000051496.1			17	2128592	2132632	lncRNA	-1
ENSGALG00000004806	-0.523026	5.02912	4.25423	0.0391526	0.574892	ENSGALG00000004806	ENSGALG00000004806.6	EDEM3	ER degradation enhancing alpha-mannosidase like protein 3 [Source:NCBI gene;Acc:424450]	8	8305678	8331735	protein_coding	-1	EDEM3	EDEM3
ENSGALG00000016580	0.870861	6.45294	4.25371	0.0391647	0.574892	ENSGALG00000016580	ENSGALG00000016580.6	SCARA5	scavenger receptor class A, member 5 (putative) [Source:NCBI gene;Acc:771061]	3	105090968	105109766	protein_coding	1	SCARA5	SCARA5
ENSGALG00000042645	0.715945	4.327	4.25351	0.0391693	0.574892	ENSGALG00000042645	ENSGALG00000042645.2	PARD3B	par-3 family cell polarity regulator beta [Source:NCBI gene;Acc:426120]	7	12763689	13129732	protein_coding	-1	PARD3B	PARD3B
ENSGALG00000014103	0.718927	5.6602	4.24774	0.0393027	0.576156	ENSGALG00000014103	ENSGALG00000014103.6	FRYL	FRY like transcription coactivator [Source:NCBI gene;Acc:422765]	4	66298316	66439427	protein_coding	1	FRYL	FRYL
ENSGALG00000007254	0.722179	2.7221	4.24311	0.0394099	0.576462	ENSGALG00000007254	ENSGALG00000007254.6	ARHGAP12	Rho GTPase activating protein 12 [Source:NCBI gene;Acc:420473]	2	14277537	14339863	protein_coding	1	ARHGAP12	ARHGAP12
ENSGALG00000004038	0.754633	4.29407	4.24275	0.0394182	0.576462	ENSGALG00000004038	ENSGALG00000004038.6	ADAL	adenosine deaminase like [Source:NCBI gene;Acc:415391]	10	6684696	6695463	protein_coding	1		ADAL
ENSGALG00000026152	1.05608	5.33078	4.23894	0.0395069	0.576945	ENSGALG00000026152	ENSGALG00000026152.3		guanylate-binding protein 4-like [Source:NCBI gene;Acc:415922]	12	2699650	2704153	protein_coding	-1		GBP4L
ENSGALG00000001109	-1.03431	2.96566	4.23726	0.039546	0.576945	ENSGALG00000001109	ENSGALG00000001109.5	GTSF1	gametocyte specific factor 1 [Source:NCBI gene;Acc:771059]	27	3444203	3455470	protein_coding	1	GTSF1	GTSF1
ENSGALG00000025743	-0.477776	5.05264	4.23392	0.0396237	0.577388	ENSGALG00000025743	ENSGALG00000025743.3	CDR2	cerebellar degeneration related protein 2 [Source:NCBI gene;Acc:416621]	14	9101306	9114177	protein_coding	-1		CDR2
ENSGALG00000000184	1.23182	1.73809	4.22989	0.039718	0.578047	ENSGALG00000000184	ENSGALG00000000184.7	SLC27A6	solute carrier family 27 (fatty acid transporter), member 6 [Source:NCBI gene;Acc:769933]	Z	45721101	45760913	protein_coding	-1	SLC27A6	SLC27A6
ENSGALG00000049450	1.54423	3.65352	4.22793	0.0397639	0.578047	ENSGALG00000049450	ENSGALG00000049450.1	IGLL1	immunoglobulin lambda like polypeptide 1 [Source:HGNC Symbol;Acc:HGNC:5870]	15	8214032	8214343	IG_V_gene	-1	IGLL1
ENSGALG00000012055	0.925326	3.04896	4.21931	0.0399663	0.580298	ENSGALG00000012055	ENSGALG00000012055.7		anti-Mullerian hormone receptor, type II [Source:NCBI gene;Acc:424261]	7	28122092	28146591	protein_coding	1		AMHR2
ENSGALG00000017302	1.02438	4.08302	4.21292	0.0401172	0.580741	ENSGALG00000017302	ENSGALG00000017302.6	SLCO2B1	solute carrier organic anion transporter family member 2B1 [Source:NCBI gene;Acc:419051]	1	195701721	195741913	protein_coding	1	SLCO2B1	SLCO2B1
ENSGALG00000004370	-0.796592	2.35132	4.21245	0.0401283	0.580741	ENSGALG00000004370	ENSGALG00000004370.7	MAP2K6	mitogen-activated protein kinase kinase 6 [Source:NCBI gene;Acc:417445]	18	7978389	8014156	protein_coding	1	MAP2K6	MAP2K6
ENSGALG00000012659	-0.686565	8.33902	4.21196	0.0401399	0.580741	ENSGALG00000012659	ENSGALG00000012659.7	CKAP4	cytoskeleton associated protein 4 [Source:NCBI gene;Acc:418073]	1	53903598	53908679	protein_coding	1	CKAP4	CKAP4
ENSGALG00000013931	0.722152	2.48406	4.20912	0.0402072	0.581025	ENSGALG00000013931	ENSGALG00000013931.7	CHIC2	cysteine rich hydrophobic domain 2 [Source:NCBI gene;Acc:422751]	4	65475198	65496134	protein_coding	1	CHIC2	CHIC2
ENSGALG00000050515	1.58361	2.6668	4.20103	0.0403995	0.583112	ENSGALG00000050515	ENSGALG00000050515.1		collagen alpha-2(IV) chain-like [Source:NCBI gene;Acc:107051274]	KZ626833.1	112024	112371	IG_V_gene	-1		LOC107051274
ENSGALG00000009740	1.04968	1.6953	4.19687	0.0404987	0.583849	ENSGALG00000009740	ENSGALG00000009740.7	RASGRP1	RAS guanyl releasing protein 1 [Source:NCBI gene;Acc:423290]	5	30872492	30911992	protein_coding	1	RASGRP1	RASGRP1
ENSGALG00000038278	0.578816	4.37596	4.19487	0.0405464	0.583849	ENSGALG00000038278	ENSGALG00000038278.2	TRIM7.2	Gallus gallus tripartite motif containing 7.2 (TRIM7.2), mRNA. [Source:RefSeq mRNA;Acc:NM_001099354]	16	2349021	2458853	protein_coding	-1		TRIM7.2
ENSGALG00000017167	-0.920463	1.25093	4.19053	0.0406503	0.584654	ENSGALG00000017167	ENSGALG00000017167.7	SLC35F2	solute carrier family 35 member F2 [Source:NCBI gene;Acc:418970]	1	181760889	181778160	protein_coding	1	SLC35F2	SLC35F2
ENSGALG00000039673	-0.535594	6.06838	4.18519	0.0407785	0.585024	ENSGALG00000039673	ENSGALG00000039673.2	GALNS	galactosamine (N-acetyl)-6-sulfatase [Source:HGNC Symbol;Acc:HGNC:4122]	11	18470242	18514508	protein_coding	-1	GALNS
ENSGALG00000044466	1.01633	1.27252	4.18476	0.0407889	0.585024	ENSGALG00000044466	ENSGALG00000044466.2		receptor-interacting serine-threonine kinase 3 [Source:NCBI gene;Acc:415708]	11	2644433	2658115	protein_coding	1		RIPK3
ENSGALG00000001463	0.645133	4.21662	4.17939	0.0409185	0.585024	ENSGALG00000001463	ENSGALG00000001463.7	PDIK1L	PDLIM1 interacting kinase 1 like [Source:HGNC Symbol;Acc:HGNC:18981]	23	3357695	3366101	protein_coding	-1	PDIK1L
ENSGALG00000042533	-0.601282	4.82459	4.17924	0.0409221	0.585024	ENSGALG00000042533	ENSGALG00000042533.2		TSPO associated protein 1 [Source:NCBI gene;Acc:417469]	19	632011	693404	protein_coding	-1		TSPOAP1
ENSGALG00000049707	1.03366	0.369115	4.17691	0.0409783	0.585024	ENSGALG00000049707	ENSGALG00000049707.1	SNORD14	Small nucleolar RNA SNORD14 [Source:RFAM;Acc:RF00016]	24	3106116	3106212	snoRNA	1		LOC112530278
ENSGALG00000041823	-0.45067	5.00878	4.17505	0.0410235	0.585024	ENSGALG00000041823	ENSGALG00000041823.2	PICK1	protein interacting with PRKCA 1 [Source:NCBI gene;Acc:418030]	1	51019143	51030492	protein_coding	-1	PICK1	PICK1
ENSGALG00000015528	1.05853	0.917877	4.17465	0.041033	0.585024	ENSGALG00000015528	ENSGALG00000015528.6	JAKMIP1	janus kinase and microtubule interacting protein 1 [Source:NCBI gene;Acc:422854]	4	79331087	79416639	protein_coding	-1	JAKMIP1	JAKMIP1
ENSGALG00000017229	-1.02743	2.35867	4.17352	0.0410605	0.585024	ENSGALG00000017229	ENSGALG00000017229.7	FAT3	FAT atypical cadherin 3 [Source:NCBI gene;Acc:395167]	1	187671552	188016984	protein_coding	-1		FAT3
ENSGALG00000009682	-0.930549	1.25504	4.16922	0.0411647	0.585024	ENSGALG00000009682	ENSGALG00000009682.5	VEPH1	ventricular zone expressed PH domain containing 1 [Source:HGNC Symbol;Acc:HGNC:25735]	9	22884604	22895776	protein_coding	1	VEPH1
ENSGALG00000040954	-1.01109	4.18712	4.16786	0.0411978	0.585024	ENSGALG00000040954	ENSGALG00000040954.2	GPR37	G protein-coupled receptor 37 [Source:NCBI gene;Acc:417748]	1	21985328	21998153	protein_coding	1		GPR37
ENSGALG00000000071	-0.574964	3.608	4.16759	0.0412043	0.585024	ENSGALG00000000071	ENSGALG00000000071.5		DNA damage induced apoptosis suppressor [Source:NCBI gene;Acc:101750305]	1	190327368	190335382	protein_coding	1		DDIAS
ENSGALG00000028145	0.779716	3.34968	4.15782	0.0414428	0.587107	ENSGALG00000028145	ENSGALG00000028145.4	BORCS6	BLOC-1 related complex subunit 6 [Source:NCBI gene;Acc:101749651]	3	75832004	75833128	protein_coding	1	BORCS6	BORCS6
ENSGALG00000038637	-0.560998	3.9763	4.15763	0.0414474	0.587107	ENSGALG00000038637	ENSGALG00000038637.2	SHF	Src homology 2 domain containing F [Source:NCBI gene;Acc:415339]	10	1314077	1328544	protein_coding	-1	SHF	SHF
ENSGALG00000038512	0.783865	3.59796	4.14705	0.0417072	0.587819	ENSGALG00000038512	ENSGALG00000038512.2	AGTR1	angiotensin II receptor type 1 [Source:NCBI gene;Acc:396065]	9	12538281	12559258	protein_coding	1		AGTR1
ENSGALG00000011294	-0.7706	3.91731	4.14642	0.0417226	0.587819	ENSGALG00000011294	ENSGALG00000011294.7	THRB	thyroid hormone receptor beta [Source:NCBI gene;Acc:396431]	2	37209656	37257267	protein_coding	-1		THRB
ENSGALG00000015322	0.81649	2.2981	4.14637	0.0417238	0.587819	ENSGALG00000015322	ENSGALG00000015322.6	IMPG2	interphotoreceptor matrix proteoglycan 2 [Source:NCBI gene;Acc:418393]	1	86333855	86382748	protein_coding	-1		IMPG2
ENSGALG00000054297	-0.46728	5.30791	4.14502	0.0417572	0.587819	ENSGALG00000054297	ENSGALG00000054297.1			1	1045168	1071292	protein_coding	1
ENSGALG00000007920	0.56298	3.8933	4.14448	0.0417706	0.587819	ENSGALG00000007920	ENSGALG00000007920.7	PRR5L	proline rich 5 like [Source:NCBI gene;Acc:423162]	5	19671101	19710796	protein_coding	1	PRR5L	PRR5L
ENSGALG00000010461	0.946756	2.24953	4.14156	0.0418426	0.587819	ENSGALG00000010461	ENSGALG00000010461.6	EBF3	early B cell factor 3 [Source:NCBI gene;Acc:395175]	6	35112704	35230061	protein_coding	-1	EBF3	EBF3
ENSGALG00000053941	-1.26179	3.68058	4.14107	0.0418546	0.587819	ENSGALG00000053941	ENSGALG00000053941.1			17	7706405	7711863	lncRNA	1
ENSGALG00000010073	-0.683605	8.65047	4.1399	0.0418837	0.587819	ENSGALG00000010073	ENSGALG00000010073.7	DDOST	dolichyl-diphosphooligosaccharide--protein glycosyltransferase non-catalytic subunit [Source:NCBI gene;Acc:425542]	21	6773167	6778804	protein_coding	1		DDOST
ENSGALG00000053342	0.888662	2.52613	4.13567	0.0419883	0.588196	ENSGALG00000053342	ENSGALG00000053342.1			6	11330254	11333782	lncRNA	1
ENSGALG00000017362	1.00648	2.96261	4.13457	0.0420158	0.588196	ENSGALG00000017362	ENSGALG00000017362.7	HAVCR1	hepatitis A virus cellular receptor 1 [Source:NCBI gene;Acc:416249]	13	12143095	12173099	protein_coding	1		HAVCR1
ENSGALG00000046593	1.23924	1.93252	4.13297	0.0420554	0.588196	ENSGALG00000046593	ENSGALG00000046593.2		adrenomedullin [Source:NCBI gene;Acc:423042]	5	9241993	9243150	protein_coding	-1		ADM
ENSGALG00000040465	0.70959	6.0783	4.12612	0.0422262	0.589907	ENSGALG00000040465	ENSGALG00000040465.2	ZEB2	zinc finger E-box binding homeobox 2 [Source:NCBI gene;Acc:424306]	7	33308256	33416501	protein_coding	-1		ZEB2
ENSGALG00000047706	-0.994058	1.31366	4.121	0.0423541	0.590639	ENSGALG00000047706	ENSGALG00000047706.1			8	11951332	11954052	protein_coding	1
ENSGALG00000032143	-0.573467	7.12601	4.11364	0.0425387	0.590639	ENSGALG00000032143	ENSGALG00000032143.3	CRISPLD2	cysteine rich secretory protein LCCL domain containing 2 [Source:NCBI gene;Acc:415818]	11	16909051	16934252	protein_coding	1	CRISPLD2	CRISPLD2
ENSGALG00000014798	-1.28539	5.26408	4.11328	0.0425478	0.590639	ENSGALG00000014798	ENSGALG00000014798.7	SERINC5	serine incorporator 5 [Source:NCBI gene;Acc:427175]	Z	21970233	22007388	protein_coding	1	SERINC5	SERINC5
ENSGALG00000007093	0.460353	5.14514	4.11232	0.0425719	0.590639	ENSGALG00000007093	ENSGALG00000007093.7	CYTH1	cytohesin 1 [Source:NCBI gene;Acc:422085]	18	9776820	9792219	protein_coding	1		CYTH1
ENSGALG00000044996	0.940961	0.972218	4.10943	0.0426447	0.590639	ENSGALG00000044996	ENSGALG00000044996.2	TMEM71	transmembrane protein 71 [Source:NCBI gene;Acc:101749956]	2	141675678	141686073	protein_coding	-1	TMEM71	TMEM71
ENSGALG00000000476	-0.959003	1.28038	4.10727	0.0426993	0.590639	ENSGALG00000000476	ENSGALG00000000476.5	LRRTM4	leucine rich repeat transmembrane neuronal 4 [Source:NCBI gene;Acc:419539]	22	4410028	4620737	protein_coding	-1	LRRTM4	LRRTM4
ENSGALG00000023936	1.0092	1.91883	4.10721	0.0427007	0.590639	ENSGALG00000023936	ENSGALG00000023936.4		C-factor-like [Source:NCBI gene;Acc:771069]	21	2230310	2238408	protein_coding	1		LOC771069
ENSGALG00000035803	2.25061	3.90712	4.10628	0.0427243	0.590639	ENSGALG00000035803	ENSGALG00000035803.2	THRSP	thyroid hormone responsive [Source:NCBI gene;Acc:404755]	1	194317270	194318711	protein_coding	1		THRSP
ENSGALG00000033338	-0.737081	5.1363	4.10459	0.042767	0.590639	ENSGALG00000033338	ENSGALG00000033338.2	GPT2	glutamic--pyruvic transaminase 2 [Source:NCBI gene;Acc:415746]	11	7736012	7757979	protein_coding	-1	GPT2	GPT2
ENSGALG00000039983	0.869614	3.15777	4.10418	0.0427772	0.590639	ENSGALG00000039983	ENSGALG00000039983.2	EEPD1	endonuclease/exonuclease/phosphatase family domain containing 1 [Source:NCBI gene;Acc:420740]	2	46739295	46798842	protein_coding	-1	EEPD1	EEPD1
ENSGALG00000032763	0.863748	2.62861	4.10258	0.0428177	0.590639	ENSGALG00000032763	ENSGALG00000032763.3	MECR	mitochondrial trans-2-enoyl-CoA reductase [Source:NCBI gene;Acc:419601]	23	2898792	2905063	protein_coding	-1	MECR	MECR
ENSGALG00000004531	-0.690262	9.41596	4.09903	0.0429079	0.590639	ENSGALG00000004531	ENSGALG00000004531.3	PLOD1	procollagen-lysine, 2-oxoglutarate 5-dioxygenase 1 [Source:NCBI gene;Acc:419485]	21	5515436	5532562	protein_coding	-1		PLOD1
ENSGALG00000021627	1.28402	5.90024	4.09899	0.0429088	0.590639	ENSGALG00000021627	ENSGALG00000021627.4	IFI27L2	interferon, alpha-inducible protein 27-like 2 [Source:NCBI gene;Acc:403121]	23	4490448	4491440	protein_coding	1		IFI27L2
ENSGALG00000016313	0.6784	4.55102	4.0923	0.0430789	0.592129	ENSGALG00000016313	ENSGALG00000016313.6	GCLC	glutamate-cysteine ligase catalytic subunit [Source:NCBI gene;Acc:421894]	3	88184018	88215580	protein_coding	1	GCLC	GCLC
ENSGALG00000007412	0.998407	2.33199	4.09092	0.0431143	0.592129	ENSGALG00000007412	ENSGALG00000007412.6	MPZL2	myelin protein zero like 2 [Source:NCBI gene;Acc:419779]	24	5471930	5477522	protein_coding	-1		MPZL2
ENSGALG00000007023	-0.469014	4.72004	4.08502	0.0432649	0.592693	ENSGALG00000007023	ENSGALG00000007023.6	PRKAR2A	protein kinase cAMP-dependent type II regulatory subunit alpha [Source:NCBI gene;Acc:100858827]	12	12133753	12182582	protein_coding	1	PRKAR2A	PRKAR2A
ENSGALG00000023036	-0.967667	1.93661	4.08397	0.0432918	0.592693	ENSGALG00000023036	ENSGALG00000023036.5			Z	81787829	81793027	protein_coding	1
ENSGALG00000008780	-0.608211	5.19202	4.08296	0.0433177	0.592693	ENSGALG00000008780	ENSGALG00000008780.6	CTBS	chitobiase [Source:NCBI gene;Acc:424535]	8	16940149	16946646	protein_coding	1	CTBS	CTBS
ENSGALG00000008272	-0.518404	5.35137	4.0817	0.0433499	0.592693	ENSGALG00000008272	ENSGALG00000008272.5	TMED3	transmembrane p24 trafficking protein 3 [Source:NCBI gene;Acc:415580]	10	20422863	20424795	protein_coding	1		TMED3
ENSGALG00000035675	-0.604208	4.41881	4.07775	0.0434515	0.593414	ENSGALG00000035675	ENSGALG00000035675.2		coiled-coil domain containing 57 [Source:NCBI gene;Acc:417379]	18	4884946	4908417	protein_coding	1		CCDC57
ENSGALG00000050332	-0.60683	6.06861	4.06389	0.0438095	0.597634	ENSGALG00000050332	ENSGALG00000050332.1			14	2745676	2753557	protein_coding	1
ENSGALG00000011098	0.469679	4.62975	4.06057	0.0438957	0.59814	ENSGALG00000011098	ENSGALG00000011098.5	TAF5L	TATA-box binding protein associated factor 5 like [Source:NCBI gene;Acc:421538]	3	40162308	40180002	protein_coding	-1	TAF5L	TAF5L
ENSGALG00000001564	0.573658	4.86591	4.0468	0.0442553	0.601782	ENSGALG00000001564	ENSGALG00000001564.6	ATP2A3	ATPase sarcoplasmic/endoplasmic reticulum Ca2+ transporting 3 [Source:NCBI gene;Acc:395707]	19	3422032	3455961	protein_coding	1		ATP2A3
ENSGALG00000010051	-0.590875	4.96899	4.04655	0.0442618	0.601782	ENSGALG00000010051	ENSGALG00000010051.6	MOCS1	molybdenum cofactor synthesis 1 [Source:NCBI gene;Acc:395270]	3	28809406	28837732	protein_coding	1	MOCS1	MOCS1
ENSGALG00000037869	0.735906	3.85768	4.04256	0.0443665	0.602534	ENSGALG00000037869	ENSGALG00000037869.2		atrial natriuretic peptide receptor 1-like [Source:NCBI gene;Acc:107055115]	25	3351408	3362735	protein_coding	1		LOC107055115
ENSGALG00000003045	0.688793	4.42475	4.02823	0.0447449	0.606779	ENSGALG00000003045	ENSGALG00000003045.5	E2F1	E2F transcription factor 1 [Source:NCBI gene;Acc:396142]	20	2177137	2180913	protein_coding	1		E2F1
ENSGALG00000016546	-0.508207	4.5198	4.02695	0.0447787	0.606779	ENSGALG00000016546	ENSGALG00000016546.5	RBBP7	RB binding protein 7, chromatin remodeling factor [Source:NCBI gene;Acc:395390]	1	122788545	122796822	protein_coding	1		RBBP7
ENSGALG00000007804	-0.691508	8.35359	4.02165	0.0449197	0.607482	ENSGALG00000007804	ENSGALG00000007804.5	GXYLT2	glucoside xylosyltransferase 2 [Source:NCBI gene;Acc:416097]	12	16898430	16917447	protein_coding	1	GXYLT2	GXYLT2
ENSGALG00000030739	0.499301	5.33896	4.02125	0.0449303	0.607482	ENSGALG00000030739	ENSGALG00000030739.2	MSL1	male specific lethal 1 homolog [Source:NCBI gene;Acc:777194]	27	7174983	7181673	protein_coding	1	MSL1	MSL1
ENSGALG00000031893	0.62907	5.31001	4.017	0.0450437	0.608339	ENSGALG00000031893	ENSGALG00000031893.2	RALA	RAS like proto-oncogene A [Source:NCBI gene;Acc:420765]	2	49840373	49868304	protein_coding	1	RALA	RALA
ENSGALG00000027571	-0.853034	1.89149	4.01117	0.0451997	0.609349	ENSGALG00000027571	ENSGALG00000027571.3		histone cluster 1, H2B-VII-like 2 (similar to human histone cluster 1, class H2B, member N) [Source:NCBI gene;Acc:770188]	1	48153914	48155235	protein_coding	1		HIST1H2B7L2
ENSGALG00000038374	0.929509	1.89771	4.00942	0.0452468	0.609349	ENSGALG00000038374	ENSGALG00000038374.3	SNX20	sorting nexin 20 [Source:NCBI gene;Acc:415726]	11	6176432	6187342	protein_coding	1		SNX20
ENSGALG00000048464	-1.39723	2.33174	4.00793	0.0452868	0.609349	ENSGALG00000048464	ENSGALG00000048464.1			1	43906792	43914560	lncRNA	-1
ENSGALG00000008638	1.20913	2.72734	4.00675	0.0453185	0.609349	ENSGALG00000008638	ENSGALG00000008638.6	MMR1L3	macrophage mannose receptor 1-like 3 [Source:NCBI gene;Acc:420515]	2	19497094	19526728	protein_coding	-1		MMR1L3
ENSGALG00000040926	0.920878	1.54661	4.00174	0.0454534	0.610489	ENSGALG00000040926	ENSGALG00000040926.2	SAMSN1	SAM domain, SH3 domain and nuclear localization signals 1 [Source:NCBI gene;Acc:418470]	1	99493728	99545821	protein_coding	-1		SAMSN1
ENSGALG00000028975	1.18515	2.11313	3.99585	0.0456124	0.610962	ENSGALG00000028975	ENSGALG00000028975.3		FERM and PDZ domain containing 3 [Source:NCBI gene;Acc:428699]	4	1944957	1966034	pseudogene	1		FRMPD3
ENSGALG00000004212	0.508666	5.86714	3.99518	0.0456307	0.610962	ENSGALG00000004212	ENSGALG00000004212.7	ADAM10	ADAM metallopeptidase domain 10 [Source:NCBI gene;Acc:374113]	10	7384780	7427378	protein_coding	1		ADAM10
ENSGALG00000008359	0.559495	4.70809	3.99487	0.0456391	0.610962	ENSGALG00000008359	ENSGALG00000008359.5	CD248	CD248 molecule [Source:NCBI gene;Acc:421234]	3	3329006	3331372	protein_coding	1		CD248
ENSGALG00000036142	-0.791601	9.68636	3.99105	0.0457424	0.611673	ENSGALG00000036142	ENSGALG00000036142.2	LOXL3	lysyl oxidase like 3 [Source:NCBI gene;Acc:425986]	4	90807622	90816116	protein_coding	1	LOXL3	LOXL3
ENSGALG00000020488	-0.467759	4.9428	3.9889	0.0458009	0.611784	ENSGALG00000020488	ENSGALG00000020488.5		chromosome 11 open reading frame 24 [Source:NCBI gene;Acc:423113]	5	16487057	16507835	protein_coding	1		C11orf24
ENSGALG00000003227	-0.790472	3.00657	3.9863	0.0458716	0.612057	ENSGALG00000003227	ENSGALG00000003227.5	RAB11FIP4	RAB11 family interacting protein 4 (class II) [Source:NCBI gene;Acc:427808]	18	6309446	6396232	protein_coding	1	RAB11FIP4	RAB11FIP4
ENSGALG00000002160	0.836321	9.80901	3.9771	0.046123	0.613694	ENSGALG00000002160	ENSGALG00000002160.6	B2M	beta-2-microglobulin [Source:NCBI gene;Acc:414830]	10	1784065	1786985	protein_coding	1		B2M
ENSGALG00000027835	-0.766639	5.36627	3.97652	0.0461388	0.613694	ENSGALG00000027835	ENSGALG00000027835.3	PCBD1	pterin-4 alpha-carbinolamine dehydratase 1 [Source:NCBI gene;Acc:395729]	6	12328156	12329964	protein_coding	-1		PCBD1
ENSGALG00000004946	-0.955228	2.07691	3.97628	0.0461454	0.613694	ENSGALG00000004946	ENSGALG00000004946.6		collagen type IV alpha 4 chain [Source:NCBI gene;Acc:424799]	9	9462681	9492856	protein_coding	-1		COL4A4
ENSGALG00000010658	-0.483042	5.46527	3.96678	0.0464065	0.614589	ENSGALG00000010658	ENSGALG00000010658.6	RWDD4	RWD domain containing 4 [Source:NCBI gene;Acc:428749]	4	39775032	39783823	protein_coding	1	RWDD4	RWDD4
ENSGALG00000008546	0.64823	4.37985	3.96553	0.0464409	0.614589	ENSGALG00000008546	ENSGALG00000008546.6	FGD5	FYVE, RhoGEF and PH domain containing 5 [Source:NCBI gene;Acc:416130]	12	20187838	20274748	protein_coding	-1	FGD5	FGD5
ENSGALG00000029270	1.1099	0.93285	3.96314	0.0465069	0.614589	ENSGALG00000029270	ENSGALG00000029270.3	GATA3	GATA binding protein 3 [Source:NCBI gene;Acc:419106]	1	4968059	4987014	protein_coding	1		GATA3
ENSGALG00000029439	-1.70211	2.15335	3.96081	0.0465713	0.614589	ENSGALG00000029439	ENSGALG00000029439.3	HOXC9	homeobox C9 [Source:NCBI gene;Acc:425723]	33	7601322	7604178	protein_coding	1		HOXC9
ENSGALG00000047577	0.847654	0.868303	3.95819	0.0466439	0.614589	ENSGALG00000047577	ENSGALG00000047577.1			5	46488214	46548179	lncRNA	-1
ENSGALG00000000736	0.924518	1.01503	3.95673	0.0466844	0.614589	ENSGALG00000000736	ENSGALG00000000736.6	MATK	megakaryocyte-associated tyrosine kinase [Source:NCBI gene;Acc:769076]	28	1056317	1061333	protein_coding	1	MATK	MATK
ENSGALG00000011347	-2.62146	5.52173	3.95324	0.0467813	0.614589	ENSGALG00000011347	ENSGALG00000011347.6	IHH	indian hedgehog [Source:NCBI gene;Acc:395801]	7	22301636	22309634	protein_coding	1		IHH
ENSGALG00000009916	-0.48126	5.87129	3.95215	0.0468114	0.614589	ENSGALG00000009916	ENSGALG00000009916.7	SCFD1	sec1 family domain containing 1 [Source:NCBI gene;Acc:423307]	5	34370977	34415640	protein_coding	1		SCFD1
ENSGALG00000004521	0.826959	8.85292	3.95084	0.046848	0.614589	ENSGALG00000004521	ENSGALG00000004521.6	GPX3	glutathione peroxidase 3 [Source:NCBI gene;Acc:427638]	13	13762915	13764542	protein_coding	-1		GPX3
ENSGALG00000011024	-0.559628	4.82776	3.95009	0.046869	0.614589	ENSGALG00000011024	ENSGALG00000011024.6	CACHD1	cache domain containing 1 [Source:NCBI gene;Acc:424693]	8	28426867	28509563	protein_coding	1	CACHD1	CACHD1
ENSGALG00000017185	0.551327	4.92405	3.95003	0.0468706	0.614589	ENSGALG00000017185	ENSGALG00000017185.7	TMEM123	transmembrane protein 123 [Source:NCBI gene;Acc:418984]	1	183903226	183920317	protein_coding	1		TMEM123
ENSGALG00000015209	0.575256	5.91922	3.94958	0.0468832	0.614589	ENSGALG00000015209	ENSGALG00000015209.4	NFIL3	nuclear factor, interleukin 3 regulated [Source:NCBI gene;Acc:395326]	Z	44356123	44369961	protein_coding	-1		NFIL3
ENSGALG00000005016	-0.926546	3.07345	3.94824	0.0469204	0.614589	ENSGALG00000005016	ENSGALG00000005016.6	ZNF608	zinc finger protein 608 [Source:NCBI gene;Acc:426810]	Z	79844243	79926708	protein_coding	1	ZNF608	ZNF608
ENSGALG00000021569	0.941811	4.84882	3.94801	0.0469269	0.614589	ENSGALG00000021569	ENSGALG00000021569.6	C1QA	complement C1q A chain [Source:NCBI gene;Acc:419504]	21	6079357	6081398	protein_coding	-1	C1QA	C1QA
ENSGALG00000038634	0.777122	2.83479	3.94504	0.0470098	0.614589	ENSGALG00000038634	ENSGALG00000038634.2	KIT	KIT proto-oncogene receptor tyrosine kinase [Source:NCBI gene;Acc:378783]	4	65269770	65321836	protein_coding	-1		KIT
ENSGALG00000039682	0.748583	3.17392	3.94468	0.0470199	0.614589	ENSGALG00000039682	ENSGALG00000039682.2	HCLS1	hematopoietic cell-specific Lyn substrate 1 [Source:NCBI gene;Acc:426867]	1	359020	371025	protein_coding	1		HCLS1
ENSGALG00000002427	-1.52387	3.85445	3.93821	0.0472008	0.615538	ENSGALG00000002427	ENSGALG00000002427.5	SMIM5	small integral membrane protein 5 [Source:NCBI gene;Acc:770371]	18	4786057	4801335	protein_coding	-1		SMIM5
ENSGALG00000027655	-0.532012	4.19094	3.93598	0.0472637	0.615538	ENSGALG00000027655	ENSGALG00000027655.3	TRABD2B	TraB domain containing 2B [Source:NCBI gene;Acc:424623]	8	22557337	22809760	protein_coding	-1	TRABD2B	TRABD2B
ENSGALG00000044071	0.776027	1.52024	3.93387	0.047323	0.615538	ENSGALG00000044071	ENSGALG00000044071.2	ABI3	ABI family member 3 [Source:NCBI gene;Acc:419988]	27	6041139	6044622	protein_coding	-1	ABI3	ABI3
ENSGALG00000046817	-0.925059	10.8775	3.93191	0.0473781	0.615538	ENSGALG00000046817	ENSGALG00000046817.1			8	11602708	11637021	protein_coding	1
ENSGALG00000015910	-0.719567	6.8144	3.93152	0.047389	0.615538	ENSGALG00000015910	ENSGALG00000015910.4	CD109	CD109 molecule [Source:NCBI gene;Acc:421862]	3	81366477	81446191	protein_coding	-1	CD109	CD109
ENSGALG00000002990	-0.579754	7.3947	3.9298	0.0474375	0.615538	ENSGALG00000002990	ENSGALG00000002990.6	PRELID1	PRELI domain containing 1 [Source:NCBI gene;Acc:395819]	13	10914280	10916096	protein_coding	-1		PRELID1
ENSGALG00000047621	-0.64553	3.58499	3.92902	0.0474597	0.615538	ENSGALG00000047621	ENSGALG00000047621.1	YBEY	ybeY metallopeptidase (putative) [Source:NCBI gene;Acc:107053767]	7	6880818	6897552	protein_coding	1	YBEY	YBEY
ENSGALG00000010432	-0.553963	3.70769	3.9277	0.0474968	0.615538	ENSGALG00000010432	ENSGALG00000010432.7	GSTZ1	glutathione S-transferase zeta 1 [Source:NCBI gene;Acc:423374]	5	39387369	39397465	protein_coding	1		GSTZ1
ENSGALG00000046727	-0.61643	5.3208	3.91527	0.0478494	0.61896	ENSGALG00000046727	ENSGALG00000046727.1		inositol polyphosphate-1-phosphatase [Source:NCBI gene;Acc:107049248]	33	5494962	5499291	protein_coding	-1		INPP1
ENSGALG00000005992	0.555602	3.92917	3.91454	0.0478702	0.61896	ENSGALG00000005992	ENSGALG00000005992.7	PDE8A	phosphodiesterase 8A [Source:NCBI gene;Acc:415455]	10	11397441	11504013	protein_coding	1	PDE8A	PDE8A
ENSGALG00000006346	1.01553	4.24015	3.91303	0.0479132	0.61896	ENSGALG00000006346	ENSGALG00000006346.5	CXCL14	C-X-C motif chemokine ligand 14 [Source:NCBI gene;Acc:395451]	13	16035275	16042796	protein_coding	1		CXCL14
ENSGALG00000048923	0.805635	2.48467	3.90636	0.0481036	0.620761	ENSGALG00000048923	ENSGALG00000048923.1	CBARP	CACN beta subunit associated regulatory protein [Source:NCBI gene;Acc:100858130]	28	3130618	3134178	protein_coding	-1	CBARP	CBARP
ENSGALG00000004813	-0.506627	5.64346	3.90138	0.0482465	0.621946	ENSGALG00000004813	ENSGALG00000004813.5	IARS1	isoleucyl-tRNA synthetase [Source:NCBI gene;Acc:415957]	12	3912103	4026538	protein_coding	1	IARS1	IARS
ENSGALG00000040480	-0.501244	5.40379	3.89898	0.0483154	0.622175	ENSGALG00000040480	ENSGALG00000040480.2	NSMCE3	NSE3 homolog, SMC5-SMC6 complex component [Source:NCBI gene;Acc:100125831]	KZ626836.1	261483	263819	protein_coding	1		NSMCE3
ENSGALG00000037545	-1.38154	3.08699	3.89222	0.0485102	0.6229	ENSGALG00000037545	ENSGALG00000037545.2	GRIP2	glutamate receptor interacting protein 2 [Source:NCBI gene;Acc:416043]	12	11417142	11482054	protein_coding	-1	GRIP2	GRIP2
ENSGALG00000005616	-0.897901	4.98668	3.89109	0.048543	0.6229	ENSGALG00000005616	ENSGALG00000005616.7	ARSI	arylsulfatase family member I [Source:NCBI gene;Acc:427639]	13	13888545	13891555	protein_coding	1	ARSI	ARSI
ENSGALG00000001951	-0.536987	4.35898	3.891	0.0485455	0.6229	ENSGALG00000001951	ENSGALG00000001951.6		family with sequence similarity 102 member B [Source:NCBI gene;Acc:768922]	8	1608099	1629918	protein_coding	1		FAM102B
ENSGALG00000031525	-0.627912	4.7122	3.88994	0.0485761	0.6229	ENSGALG00000031525	ENSGALG00000031525.2	TSTA3	tissue specific transplantation antigen P35B [Source:NCBI gene;Acc:420292]	2	148892100	148896528	protein_coding	-1		TSTA3
ENSGALG00000001943	0.688448	3.11983	3.88324	0.0487705	0.624734	ENSGALG00000001943	ENSGALG00000001943.6	RHBDF2	rhomboid 5 homolog 2 [Source:NCBI gene;Acc:417358]	18	4361778	4372525	protein_coding	1	RHBDF2	RHBDF2
ENSGALG00000013725	0.525373	4.27057	3.87175	0.0491054	0.628364	ENSGALG00000013725	ENSGALG00000013725.6	LONRF1	LON peptidase N-terminal domain and ring finger 1 [Source:NCBI gene;Acc:422742]	4	64714109	64728848	protein_coding	1	LONRF1	LONRF1
ENSGALG00000039549	-0.511464	6.40193	3.86959	0.0491684	0.628509	ENSGALG00000039549	ENSGALG00000039549.2	SEL1L3	SEL1L family member 3 [Source:NCBI gene;Acc:422804]	4	73376533	73408302	protein_coding	1	SEL1L3	SEL1L3
ENSGALG00000002583	0.584147	4.01819	3.86262	0.0493731	0.628821	ENSGALG00000002583	ENSGALG00000002583.5	PIK3CD	phosphatidylinositol-4,5-bisphosphate 3-kinase catalytic subunit delta [Source:NCBI gene;Acc:419444]	21	3475568	3498330	protein_coding	1		PIK3CD
ENSGALG00000012947	-0.576479	3.47993	3.86083	0.049426	0.628821	ENSGALG00000012947	ENSGALG00000012947.7	CAPRIN2	caprin family member 2 [Source:NCBI gene;Acc:418141]	1	59579364	59610650	protein_coding	1	CAPRIN2	CAPRIN2
ENSGALG00000044293	-0.65322	4.14486	3.85518	0.0495925	0.628821	ENSGALG00000044293	ENSGALG00000044293.2			9	23634895	23640384	protein_coding	1
ENSGALG00000009338	0.481777	4.88347	3.85497	0.0495989	0.628821	ENSGALG00000009338	ENSGALG00000009338.5	ZFYVE1	zinc finger FYVE-type containing 1 [Source:NCBI gene;Acc:423252]	5	26653986	26676965	protein_coding	1		ZFYVE1
ENSGALG00000033198	-0.769688	6.04555	3.8522	0.0496807	0.628821	ENSGALG00000033198	ENSGALG00000033198.2	MYO5C	myosin VC [Source:NCBI gene;Acc:430027]	10	9286269	9316180	protein_coding	1	MYO5C	MYO5C
ENSGALG00000049402	0.936151	3.24882	3.85176	0.0496938	0.628821	ENSGALG00000049402	ENSGALG00000049402.1			26	2642206	2646189	protein_coding	1
ENSGALG00000005628	-0.994433	13.2734	3.85098	0.049717	0.628821	ENSGALG00000005628	ENSGALG00000005628.5	COL9A3	collagen type IX alpha 3 chain [Source:NCBI gene;Acc:396242]	20	8340728	8372146	protein_coding	1		COL9A3
ENSGALG00000009431	-0.887881	0.878628	3.85072	0.0497246	0.628821	ENSGALG00000009431	ENSGALG00000009431.6	PLEKHD1	pleckstrin homology and coiled-coil domain containing D1 [Source:NCBI gene;Acc:423260]	5	28194527	28212226	protein_coding	-1	PLEKHD1	PLEKHD1
ENSGALG00000008152	-0.618165	6.60776	3.85049	0.0497315	0.628821	ENSGALG00000008152	ENSGALG00000008152.7	SPATS2L	spermatogenesis associated serine rich 2 like [Source:NCBI gene;Acc:424067]	7	11092899	11169151	protein_coding	1		SPATS2L
ENSGALG00000030008	0.679756	3.87013	3.84972	0.0497544	0.628821	ENSGALG00000030008	ENSGALG00000030008.2	HHEX	hematopoietically expressed homeobox [Source:NCBI gene;Acc:396182]	6	21666750	21671233	protein_coding	-1		HHEX
ENSGALG00000013489	0.499326	4.12018	3.84829	0.0497968	0.628821	ENSGALG00000013489	ENSGALG00000013489.5	CCDC82	coiled-coil domain containing 82 [Source:NCBI gene;Acc:426136]	1	186228663	186241876	protein_coding	1	CCDC82	CCDC82
ENSGALG00000007077	0.583423	4.73169	3.84777	0.0498122	0.628821	ENSGALG00000007077	ENSGALG00000007077.6	CPT1A	carnitine palmitoyltransferase 1A [Source:NCBI gene;Acc:423118]	5	16814154	16844218	protein_coding	-1		CPT1A
ENSGALG00000035244	-1.33501	1.22157	3.84272	0.0499623	0.628884	ENSGALG00000035244	ENSGALG00000035244.2		histone cluster 2 H3 family member d [Source:NCBI gene;Acc:770022]	1	48117646	48118846	protein_coding	1		HIST2H3A
ENSGALG00000048488	0.983856	4.94275	3.84205	0.0499824	0.628884	ENSGALG00000048488	ENSGALG00000048488.1			6	3358158	3361503	lncRNA	1
ENSGALG00000050596	0.516518	4.13448	3.84138	0.0500023	0.628884	ENSGALG00000050596	ENSGALG00000050596.1		natterin-3-like [Source:NCBI gene;Acc:101748084]	31	5620861	5622867	protein_coding	-1		LOC101748084
ENSGALG00000009050	0.971894	1.46404	3.83952	0.0500577	0.628884	ENSGALG00000009050	ENSGALG00000009050.7	CAPN3	calpain 3 [Source:NCBI gene;Acc:423233]	5	25874264	25898344	protein_coding	1		CAPN3
ENSGALG00000031934	0.899306	2.84727	3.83815	0.0500987	0.628884	ENSGALG00000031934	ENSGALG00000031934.2	TES	testin LIM domain protein [Source:NCBI gene;Acc:395332]	1	25316566	25342793	protein_coding	-1		TES
ENSGALG00000023279	0.524072	4.3914	3.83721	0.0501269	0.628884	ENSGALG00000023279	ENSGALG00000023279.4	EPN3	epsin 3 [Source:NCBI gene;Acc:100859290]	18	10313614	10319264	protein_coding	-1	EPN3	EPN3
ENSGALG00000003137	-0.568508	5.42346	3.83032	0.0503333	0.630823	ENSGALG00000003137	ENSGALG00000003137.7	RFLNA	refilin A [Source:NCBI gene;Acc:771797]	15	5036041	5046876	protein_coding	-1	RFLNA	RFLNA
ENSGALG00000036093	0.828775	1.43412	3.82022	0.0506375	0.633984	ENSGALG00000036093	ENSGALG00000036093.3	PTPN7	protein tyrosine phosphatase, non-receptor type 7 [Source:NCBI gene;Acc:770905]	26	367531	376406	protein_coding	-1	PTPN7	PTPN7
ENSGALG00000012530	-0.498827	4.55762	3.81641	0.0507528	0.634775	ENSGALG00000012530	ENSGALG00000012530.7	FOXRED2	FAD dependent oxidoreductase domain containing 2 [Source:NCBI gene;Acc:418054]	1	51716683	51725962	protein_coding	1	FOXRED2	FOXRED2
ENSGALG00000000695	0.865944	2.69404	3.80676	0.0510462	0.637761	ENSGALG00000000695	ENSGALG00000000695.6	MFSD4A	major facilitator superfamily domain containing 4A [Source:NCBI gene;Acc:419831]	26	2178133	2192431	protein_coding	1	MFSD4A	MFSD4A
ENSGALG00000005423	-0.699806	2.8304	3.8037	0.0511394	0.637761	ENSGALG00000005423	ENSGALG00000005423.7	GRHPR	glyoxylate and hydroxypyruvate reductase [Source:NCBI gene;Acc:426806]	Z	81867579	81872830	protein_coding	-1	GRHPR	GRHPR
ENSGALG00000014526	-0.584358	7.81796	3.80333	0.0511508	0.637761	ENSGALG00000014526	ENSGALG00000014526.4	TPI1	triosephosphate isomerase 1 [Source:NCBI gene;Acc:396435]	1	77940005	77943711	protein_coding	1		TPI1
ENSGALG00000009725	-0.964187	5.28072	3.80169	0.0512009	0.637761	ENSGALG00000009725	ENSGALG00000009725.7	SCG5	secretogranin V [Source:NCBI gene;Acc:769742]	5	30796985	30824895	protein_coding	-1		SCG5
ENSGALG00000028880	-0.64443	4.8797	3.79663	0.0513559	0.639038	ENSGALG00000028880	ENSGALG00000028880.4	FDPS	farnesyl diphosphate synthase [Source:NCBI gene;Acc:425061]	25	3549515	3553094	protein_coding	1	FDPS	FDPS
ENSGALG00000031975	0.494431	5.7978	3.7885	0.0516059	0.640597	ENSGALG00000031975	ENSGALG00000031975.2	UBE2H	ubiquitin conjugating enzyme E2 H [Source:NCBI gene;Acc:416678]	1	1491840	1533752	protein_coding	-1		UBE2H
ENSGALG00000021340	-1.27697	5.50514	3.78676	0.0516594	0.640597	ENSGALG00000021340	ENSGALG00000021340.6	CA9	carbonic anhydrase 9 [Source:NCBI gene;Acc:770004]	Z	9225475	9236423	protein_coding	-1	CA9	CA9
ENSGALG00000006008	0.975361	1.07473	3.78518	0.0517083	0.640597	ENSGALG00000006008	ENSGALG00000006008.6	HOMER2	homer scaffolding protein 2 [Source:NCBI gene;Acc:415458]	10	11559419	11588865	protein_coding	-1	HOMER2	HOMER2
ENSGALG00000014203	0.866735	2.41202	3.78412	0.0517412	0.640597	ENSGALG00000014203	ENSGALG00000014203.7	PARVG	parvin gamma [Source:NCBI gene;Acc:418236]	1	69176886	69198132	protein_coding	1	PARVG	PARVG
ENSGALG00000010638	0.518036	4.14505	3.78402	0.0517442	0.640597	ENSGALG00000010638	ENSGALG00000010638.6	CASP3	caspase 3 [Source:NCBI gene;Acc:395476]	4	39494858	39510633	protein_coding	1		CASP3
ENSGALG00000004088	0.532565	4.77844	3.78137	0.0518262	0.640961	ENSGALG00000004088	ENSGALG00000004088.6	FNBP1	formin binding protein 1 [Source:NCBI gene;Acc:417187]	17	6032920	6121111	protein_coding	-1	FNBP1	FNBP1
ENSGALG00000005481	0.780452	3.34758	3.77581	0.0519987	0.641094	ENSGALG00000005481	ENSGALG00000005481.4	ARHGEF3	Rho guanine nucleotide exchange factor 3 [Source:NCBI gene;Acc:416000]	12	8830149	8941812	protein_coding	-1		ARHGEF3
ENSGALG00000012480	0.563499	5.40519	3.77557	0.0520062	0.641094	ENSGALG00000012480	ENSGALG00000012480.7	NMI	N-myc and STAT interactor [Source:NCBI gene;Acc:424314]	7	35101444	35110812	protein_coding	-1	NMI	NMI
ENSGALG00000007945	1.14271	0.924002	3.7755	0.0520084	0.641094	ENSGALG00000007945	ENSGALG00000007945.7	CRYAB	crystallin alpha B [Source:NCBI gene;Acc:396089]	24	6239995	6246232	protein_coding	1		CRYAB
ENSGALG00000009705	0.842019	0.887207	3.77424	0.0520474	0.641094	ENSGALG00000009705	ENSGALG00000009705.7	RYR3	ryanodine receptor 3 [Source:NCBI gene;Acc:396111]	5	30373917	30541375	protein_coding	-1		RYR3
ENSGALG00000047357	-0.798164	1.68837	3.77095	0.0521501	0.64171	ENSGALG00000047357	ENSGALG00000047357.1			3	32320854	32331686	protein_coding	-1
ENSGALG00000010988	-0.663118	4.27393	3.7682	0.0522358	0.642115	ENSGALG00000010988	ENSGALG00000010988.6	MPP6	membrane palmitoylated protein 6 [Source:NCBI gene;Acc:420622]	2	31577867	31599648	protein_coding	1	MPP6	MPP6
ENSGALG00000027483	0.730672	2.84851	3.76581	0.0523104	0.642384	ENSGALG00000027483	ENSGALG00000027483.3	GLRX	glutaredoxin [Source:NCBI gene;Acc:396069]	Z	57547979	57556623	protein_coding	1		GLRX
ENSGALG00000010785	-0.624314	3.92654	3.76057	0.0524748	0.643755	ENSGALG00000010785	ENSGALG00000010785.6	ACOT11	acyl-CoA thioesterase 11 [Source:NCBI gene;Acc:429108]	8	25581818	25591828	protein_coding	1	ACOT11	ACOT11
ENSGALG00000027788	-0.581654	7.47862	3.75823	0.0525481	0.644006	ENSGALG00000027788	ENSGALG00000027788.3	CPE	carboxypeptidase E [Source:NCBI gene;Acc:422424]	4	23889262	23935926	protein_coding	1	CPE	CPE
ENSGALG00000015253	-0.823096	9.63732	3.75642	0.0526052	0.644057	ENSGALG00000015253	ENSGALG00000015253.6	COL8A1	collagen type VIII alpha 1 chain [Source:NCBI gene;Acc:418378]	1	85383662	85470351	protein_coding	-1		COL8A1
ENSGALG00000037410	0.818545	1.7069	3.75274	0.0527212	0.644608	ENSGALG00000037410	ENSGALG00000037410.2	HEPH	hephaestin [Source:NCBI gene;Acc:422168]	4	297485	319373	protein_coding	1	HEPH	HEPH
ENSGALG00000012610	0.621362	6.10497	3.75061	0.0527884	0.644608	ENSGALG00000012610	ENSGALG00000012610.7	CTSV	cathepsin V [Source:NCBI gene;Acc:427466]	Z	41419265	41425489	protein_coding	1		CTSV
ENSGALG00000010874	-0.759885	4.40329	3.74906	0.0528372	0.644608	ENSGALG00000010874	ENSGALG00000010874.6	UNC79	unc-79 homolog (C. elegans) [Source:NCBI gene;Acc:423426]	5	45340638	45435097	protein_coding	1	UNC79	UNC79
ENSGALG00000013535	0.841519	3.32168	3.74798	0.0528715	0.644608	ENSGALG00000013535	ENSGALG00000013535.6	CYP4V2	cytochrome P450 family 4 subfamily V member 2 [Source:NCBI gene;Acc:415121]	4	61357027	61369973	protein_coding	1		CYP4V2
ENSGALG00000032903	0.878037	2.67856	3.74661	0.0529148	0.644608	ENSGALG00000032903	ENSGALG00000032903.3		reticulon 4 receptor-like 2 [Source:NCBI gene;Acc:425201]	5	17264187	17267580	protein_coding	-1		RTN4RL2
ENSGALG00000006950	-0.524488	4.39826	3.74034	0.0531137	0.64601	ENSGALG00000006950	ENSGALG00000006950.6	LIMK2	LIM domain kinase 2 [Source:NCBI gene;Acc:396010]	15	9338543	9369255	protein_coding	-1		LIMK2
ENSGALG00000012710	-0.69394	3.94881	3.73964	0.053136	0.64601	ENSGALG00000012710	ENSGALG00000012710.6	NCS1	neuronal calcium sensor 1 [Source:NCBI gene;Acc:396336]	17	6162996	6173508	protein_coding	1		NCS1
ENSGALG00000004121	-0.589977	7.68651	3.73673	0.0532286	0.646094	ENSGALG00000004121	ENSGALG00000004121.7	LPAR4	lysophosphatidic acid receptor 4 [Source:NCBI gene;Acc:422149]	4	1395651	1409355	protein_coding	1		LPAR4
ENSGALG00000037170	1.09193	1.11508	3.73069	0.0534212	0.646094	ENSGALG00000037170	ENSGALG00000037170.3	TRIM39.2	tripartite motif containing 39.2 [Source:NCBI gene;Acc:417041]	16	2499936	2503957	protein_coding	-1		TRIM39.2
ENSGALG00000011998	-0.642859	7.71517	3.73063	0.0534233	0.646094	ENSGALG00000011998	ENSGALG00000011998.6	SEC24D	SEC24 homolog D, COPII coat complex component [Source:NCBI gene;Acc:422683]	4	54919270	54969961	protein_coding	1	SEC24D	SEC24D
ENSGALG00000039212	-0.524557	6.05246	3.73028	0.0534343	0.646094	ENSGALG00000039212	ENSGALG00000039212.2	NDUFA13	NADH:ubiquinone oxidoreductase subunit A13 [Source:NCBI gene;Acc:100859320]	28	3554000	3555101	protein_coding	-1	NDUFA13	NDUFA13
ENSGALG00000012355	-0.529084	6.07523	3.72806	0.0535056	0.646094	ENSGALG00000012355	ENSGALG00000012355.6	DARS	aspartyl-tRNA synthetase [Source:NCBI gene;Acc:424296]	7	30683175	30721164	protein_coding	-1		DARS
ENSGALG00000034297	0.714394	2.87093	3.72697	0.0535406	0.646094	ENSGALG00000034297	ENSGALG00000034297.2	TBX2	T-box 2 [Source:NCBI gene;Acc:373990]	19	7778745	7786908	protein_coding	-1	TBX2	TBX2
ENSGALG00000049372	0.72459	3.69685	3.72548	0.0535883	0.646094	ENSGALG00000049372	ENSGALG00000049372.1			2	66433099	66438613	protein_coding	1
ENSGALG00000013503	0.998831	0.741819	3.72468	0.0536139	0.646094	ENSGALG00000013503	ENSGALG00000013503.7	FAM149A	family with sequence similarity 149 member A [Source:NCBI gene;Acc:422721]	4	61340939	61353442	protein_coding	1	FAM149A	FAM149A
ENSGALG00000011875	0.914042	0.59112	3.72448	0.0536202	0.646094	ENSGALG00000011875	ENSGALG00000011875.6	TRPC3	transient receptor potential cation channel subfamily C member 3 [Source:NCBI gene;Acc:374153]	4	53878897	53918091	protein_coding	1		TRPC3
ENSGALG00000004719	0.593303	7.67684	3.719	0.0537966	0.647249	ENSGALG00000004719	ENSGALG00000004719.6	SPTAN1	spectrin alpha, non-erythrocytic 1 [Source:NCBI gene;Acc:374234]	17	5511446	5557670	protein_coding	1		SPTAN1
ENSGALG00000005869	-0.554083	7.73059	3.7182	0.0538223	0.647249	ENSGALG00000005869	ENSGALG00000005869.7	COPG1	coatomer protein complex subunit gamma 1 [Source:NCBI gene;Acc:416014]	12	9501312	9520387	protein_coding	1		COPG1
ENSGALG00000031343	0.558016	5.29433	3.71285	0.0539951	0.648524	ENSGALG00000031343	ENSGALG00000031343.2	ECE1	endothelin converting enzyme 1 [Source:NCBI gene;Acc:395459]	21	6611137	6620377	protein_coding	1		ECE1
ENSGALG00000037400	1.11423	0.244437	3.71162	0.0540348	0.648524	ENSGALG00000037400	ENSGALG00000037400.3			14	7133469	7135314	lncRNA	-1
ENSGALG00000050634	0.972584	2.63454	3.70558	0.0542307	0.650235	ENSGALG00000050634	ENSGALG00000050634.1		cytochrome P450 2G1-like [Source:NCBI gene;Acc:112530469]	32	594320	602481	protein_coding	1		LOC112530469
ENSGALG00000006583	0.845986	6.2269	3.70287	0.0543189	0.650317	ENSGALG00000006583	ENSGALG00000006583.7	LSP1P1	lymphocyte-specific protein 1 pseudogene 1 [Source:NCBI gene;Acc:374254]	5	14250735	14289860	protein_coding	-1		LSP1P1
ENSGALG00000032530	0.935652	1.12854	3.70209	0.0543444	0.650317	ENSGALG00000032530	ENSGALG00000032530.2	SASH3	SAM and SH3 domain containing 3 [Source:NCBI gene;Acc:422138]	4	1634846	1637992	protein_coding	-1		SASH3
ENSGALG00000026077	-0.596426	8.05978	3.69751	0.0544938	0.651465	ENSGALG00000026077	ENSGALG00000026077.3	ALDOC	aldolase, fructose-bisphosphate C [Source:NCBI gene;Acc:395492]	19	5884422	5888133	protein_coding	-1		ALDOC
ENSGALG00000034065	0.453728	4.77784	3.69457	0.0545899	0.65168	ENSGALG00000034065	ENSGALG00000034065.3		stem-loop binding protein-like [Source:NCBI gene;Acc:422901]	4	83916252	83928157	protein_coding	1		LOC422901
ENSGALG00000008603	0.898736	3.7221	3.69226	0.0546655	0.65168	ENSGALG00000008603	ENSGALG00000008603.5	ITPKA	inositol-trisphosphate 3-kinase A [Source:NCBI gene;Acc:395694]	5	24896103	24930838	protein_coding	1		ITPKA
ENSGALG00000032428	1.00268	3.66312	3.69206	0.0546722	0.65168	ENSGALG00000032428	ENSGALG00000032428.3		chromosome 11 open reading frame, human C19orf12-like [Source:NCBI gene;Acc:100858381]	11	8389347	8396105	protein_coding	-1		LOC100858381
ENSGALG00000022696	1.10738	3.14549	3.68921	0.0547654	0.651789	ENSGALG00000022696	ENSGALG00000022696.5	KCNE3	potassium voltage-gated channel subfamily E regulatory subunit 3 [Source:NCBI gene;Acc:428105]	1	195858573	195860342	protein_coding	-1	KCNE3	KCNE3
ENSGALG00000045063	1.14483	1.67477	3.68852	0.0547884	0.651789	ENSGALG00000045063	ENSGALG00000045063.2	LRP2BP	LRP2 binding protein [Source:NCBI gene;Acc:422543]	4	39256632	39264968	protein_coding	1	LRP2BP	LRP2BP
ENSGALG00000047569	1.0992	2.30983	3.68612	0.0548673	0.652091	ENSGALG00000047569	ENSGALG00000047569.1		plectin pseudogene [Source:NCBI gene;Acc:107050990]	2	34797	36200	protein_coding	-1		LOC107050990
ENSGALG00000001076	0.822124	1.79058	3.68227	0.0549938	0.652702	ENSGALG00000001076	ENSGALG00000001076.6	LIMK1	LIM domain kinase 1 [Source:NCBI gene;Acc:373922]	19	963194	972046	protein_coding	1		LIMK1
ENSGALG00000006190	0.730613	6.11986	3.68004	0.0550676	0.652702	ENSGALG00000006190	ENSGALG00000006190.6	FHL1	four and a half LIM domains 1 [Source:NCBI gene;Acc:770787]	4	4200870	4231430	protein_coding	1	FHL1	FHL1
ENSGALG00000040156	-0.603611	6.01749	3.67904	0.0551007	0.652702	ENSGALG00000040156	ENSGALG00000040156.2	CCDC88C	coiled-coil domain containing 88B [Source:NCBI gene;Acc:423410]	5	44452433	44535237	protein_coding	-1	CCDC88C	CCDC88B
ENSGALG00000015854	-0.47077	5.83372	3.67612	0.0551973	0.652702	ENSGALG00000015854	ENSGALG00000015854.6	PGM3	phosphoglucomutase 3 [Source:NCBI gene;Acc:421841]	3	77925881	77936295	protein_coding	1	PGM3	PGM3
ENSGALG00000008890	0.753322	4.41516	3.67269	0.0553109	0.652702	ENSGALG00000008890	ENSGALG00000008890.6	ADGRL4	adhesion G protein-coupled receptor L4 [Source:NCBI gene;Acc:424546]	8	18695737	18954195	protein_coding	1	ADGRL4	ADGRL4
ENSGALG00000032502	0.483534	4.77769	3.67152	0.0553496	0.652702	ENSGALG00000032502	ENSGALG00000032502.2	HPS5	HPS5 biogenesis of lysosomal organelles complex 2 subunit 2 [Source:NCBI gene;Acc:107048993]	5	12693358	12712111	protein_coding	-1	HPS5	HPS5
ENSGALG00000008949	0.993907	2.59727	3.67119	0.0553606	0.652702	ENSGALG00000008949	ENSGALG00000008949.5	ADRB1	adrenoceptor beta 1 [Source:NCBI gene;Acc:101750705]	6	28606240	28608617	protein_coding	1	ADRB1	ADRB1
ENSGALG00000007102	-0.470852	6.23291	3.66959	0.0554139	0.652702	ENSGALG00000007102	ENSGALG00000007102.6	MLEC	malectin [Source:NCBI gene;Acc:416971]	15	9477751	9488714	protein_coding	-1	MLEC	MLEC
ENSGALG00000011306	0.981471	4.66789	3.66854	0.0554488	0.652702	ENSGALG00000011306	ENSGALG00000011306.6	DES	desmin [Source:NCBI gene;Acc:395906]	7	22170600	22175002	protein_coding	-1	DES	DES
ENSGALG00000009276	-0.800497	2.77506	3.66837	0.0554545	0.652702	ENSGALG00000009276	ENSGALG00000009276.6	LRAT	lecithin retinol acyltransferase (phosphatidylcholine--retinol O-acyltransferase) [Source:NCBI gene;Acc:422403]	4	20396156	20397656	protein_coding	1	LRAT	LRAT
ENSGALG00000004398	0.887521	2.72205	3.66408	0.0555973	0.653751	ENSGALG00000004398	ENSGALG00000004398.6	CARD11	caspase recruitment domain family member 11 [Source:NCBI gene;Acc:416476]	14	3830739	3870033	protein_coding	-1		CARD11
ENSGALG00000023122	0.98711	1.24313	3.66199	0.0556672	0.653942	ENSGALG00000023122	ENSGALG00000023122.4	SULT1B	sulfotransferase family, cytosolic, 1B [Source:NCBI gene;Acc:422661]	4	51790372	51792467	protein_coding	-1		SULT1B
ENSGALG00000000284	0.863641	2.5655	3.65711	0.0558303	0.655226	ENSGALG00000000284	ENSGALG00000000284.6	HOXB4	homeobox B4 [Source:NCBI gene;Acc:396230]	27	6243545	6248818	protein_coding	1		HOXB4
ENSGALG00000049430	1.07522	1.38328	3.65381	0.055941	0.655459	ENSGALG00000049430	ENSGALG00000049430.1			2	12791965	12835141	lncRNA	-1
ENSGALG00000013232	0.755452	2.34328	3.65331	0.0559578	0.655459	ENSGALG00000013232	ENSGALG00000013232.7	RHBG	Rh family B glycoprotein [Source:NCBI gene;Acc:378792]	25	2675996	2680461	protein_coding	1		RHBG
ENSGALG00000050943	0.587737	3.46013	3.65125	0.0560271	0.65564	ENSGALG00000050943	ENSGALG00000050943.1	RNF19B	ring finger protein 19B [Source:HGNC Symbol;Acc:HGNC:26886]	23	5446874	5449628	protein_coding	-1	RNF19B
ENSGALG00000053091	0.970674	1.06781	3.64728	0.0561609	0.655657	ENSGALG00000053091	ENSGALG00000053091.1			7	19714510	19723832	lncRNA	1
ENSGALG00000024332	0.550814	4.04206	3.6469	0.0561736	0.655657	ENSGALG00000024332	ENSGALG00000024332.4	CDC34	cell division cycle 34 [Source:NCBI gene;Acc:425483]	28	2764612	2770412	protein_coding	1	CDC34	CDC34
ENSGALG00000006494	-0.942597	3.81658	3.64616	0.0561986	0.655657	ENSGALG00000006494	ENSGALG00000006494.6	GRAMD1B	GRAM domain containing 1B [Source:NCBI gene;Acc:769528]	24	2929796	3036108	protein_coding	-1	GRAMD1B	GRAMD1B
ENSGALG00000001177	0.767351	4.8383	3.64482	0.0562437	0.655657	ENSGALG00000001177	ENSGALG00000001177.6	CD34	CD34 molecule [Source:NCBI gene;Acc:419856]	26	2726911	2737426	protein_coding	-1	CD34	CD34
ENSGALG00000015086	0.471439	4.76443	3.64222	0.0563318	0.656056	ENSGALG00000015086	ENSGALG00000015086.6	OSBPL1A	oxysterol binding protein like 1A [Source:NCBI gene;Acc:421079]	2	103288644	103359526	protein_coding	-1	OSBPL1A	OSBPL1A
ENSGALG00000005936	0.936169	3.49898	3.63684	0.0565141	0.657549	ENSGALG00000005936	ENSGALG00000005936.5	AGTR2	angiotensin II receptor type 2 [Source:NCBI gene;Acc:428708]	4	2997857	3013197	protein_coding	1	AGTR2	AGTR2
ENSGALG00000015702	0.616391	4.5424	3.63365	0.0566226	0.657885	ENSGALG00000015702	ENSGALG00000015702.7	PTGR1	prostaglandin reductase 1 [Source:NCBI gene;Acc:427337]	Z	66692894	66712751	protein_coding	1		PTGR1
ENSGALG00000031797	-0.473666	4.46533	3.63	0.0567468	0.657885	ENSGALG00000031797	ENSGALG00000031797.2	JAGN1	tubulin tyrosine ligase like 8 [Source:NCBI gene;Acc:416052]	12	11888869	11890055	protein_coding	1	JAGN1	TTLL8
ENSGALG00000046412	-0.799244	5.06255	3.62948	0.0567645	0.657885	ENSGALG00000046412	ENSGALG00000046412.2		amine oxidase, copper containing 3 [Source:NCBI gene;Acc:420015]	27	7891211	7896570	protein_coding	1		AOC3
ENSGALG00000013090	-1.54767	5.21222	3.629	0.0567809	0.657885	ENSGALG00000013090	ENSGALG00000013090.6	LOXL4	lysyl oxidase like 4 [Source:NCBI gene;Acc:769927]	6	23213501	23218830	protein_coding	1	LOXL4	LOXL4
ENSGALG00000014754	0.870269	1.38766	3.62559	0.0568974	0.657885	ENSGALG00000014754	ENSGALG00000014754.7			1	78777330	78971694	protein_coding	-1
ENSGALG00000012412	-0.585672	5.76944	3.62488	0.0569216	0.657885	ENSGALG00000012412	ENSGALG00000012412.6	MTHFD1L	methylenetetrahydrofolate dehydrogenase (NADP+ dependent) 1 like [Source:NCBI gene;Acc:421633]	3	48743410	48879114	protein_coding	1	MTHFD1L	MTHFD1L
ENSGALG00000009075	-0.588634	6.77728	3.6232	0.0569791	0.657885	ENSGALG00000009075	ENSGALG00000009075.6	CD99L2	CD99 molecule like 2 [Source:NCBI gene;Acc:422386]	4	17685301	17700030	protein_coding	1	CD99L2	CD99L2
ENSGALG00000005694	-0.521854	6.44524	3.62092	0.0570575	0.657885	ENSGALG00000005694	ENSGALG00000005694.7	GARS	glycyl-tRNA synthetase [Source:NCBI gene;Acc:428403]	2	4427833	4450500	protein_coding	-1		GARS
ENSGALG00000041687	-0.552588	7.16937	3.62045	0.0570733	0.657885	ENSGALG00000041687	ENSGALG00000041687.2	SREBF2	sterol regulatory element binding transcription factor 2 [Source:NCBI gene;Acc:395304]	1	49494257	49513013	protein_coding	-1	SREBF2	SREBF2
ENSGALG00000030969	-0.769776	11.1736	3.62017	0.057083	0.657885	ENSGALG00000030969	ENSGALG00000030969.2	CLEC3B	C-type lectin domain family 3 member B [Source:NCBI gene;Acc:395386]	2	43035072	43041839	protein_coding	-1		CLEC3B
ENSGALG00000002461	1.29414	2.70831	3.61722	0.0571844	0.657996	ENSGALG00000002461	ENSGALG00000002461.6			15	3014915	3017600	protein_coding	-1
ENSGALG00000034855	0.54704	6.91712	3.61543	0.0572459	0.657996	ENSGALG00000034855	ENSGALG00000034855.2	HK2	hexokinase 2 [Source:NCBI gene;Acc:374044]	22	4049954	4131577	protein_coding	-1		HK2
ENSGALG00000005995	-1.22981	4.33944	3.61518	0.0572546	0.657996	ENSGALG00000005995	ENSGALG00000005995.7	SLC13A5	solute carrier family 13 member 5 [Source:HGNC Symbol;Acc:HGNC:23089]	19	9919986	9937317	protein_coding	1	SLC13A5
ENSGALG00000002024	-0.529875	6.86916	3.61198	0.0573648	0.6582	ENSGALG00000002024	ENSGALG00000002024.7	COMT	catechol-O-methyltransferase [Source:NCBI gene;Acc:416783]	15	1326281	1366341	protein_coding	1	COMT	COMT
ENSGALG00000031896	0.52173	4.59748	3.61153	0.0573805	0.6582	ENSGALG00000031896	ENSGALG00000031896.2	GSE1	Gse1 coiled-coil protein [Source:NCBI gene;Acc:426226]	11	17637205	17650300	protein_coding	-1	GSE1	GSE1
ENSGALG00000007886	-0.666935	5.90307	3.60872	0.0574773	0.658691	ENSGALG00000007886	ENSGALG00000007886.7			5	19338964	19346387	protein_coding	-1
ENSGALG00000026809	-0.571078	6.03267	3.60528	0.0575963	0.658767	ENSGALG00000026809	ENSGALG00000026809.4	SARS	seryl-tRNA synthetase [Source:NCBI gene;Acc:426697]	26	1158656	1164305	protein_coding	1		SARS
ENSGALG00000053836	0.824034	0.559566	3.60183	0.057716	0.658767	ENSGALG00000053836	ENSGALG00000053836.1	SIPA1	signal-induced proliferation-associated 1-like protein 3-like [Source:NCBI gene;Acc:101749913]	33	6309066	6315542	protein_coding	1	SIPA1	LOC101749913
ENSGALG00000028560	1.5324	2.68643	3.60149	0.0577279	0.658767	ENSGALG00000028560	ENSGALG00000028560.2	OC3	osteocalcin-like protein OC3 [Source:NCBI gene;Acc:417943]	1	48037612	48043641	protein_coding	1		OC3
ENSGALG00000027462	-0.562822	7.36673	3.60122	0.0577372	0.658767	ENSGALG00000027462	ENSGALG00000027462.3	P3H4	prolyl 3-hydroxylase family member 4 (non-enzymatic) [Source:NCBI gene;Acc:430099]	27	7494350	7498376	protein_coding	-1	P3H4	P3H4
ENSGALG00000004325	-0.665813	9.38688	3.60057	0.0577596	0.658767	ENSGALG00000004325	ENSGALG00000004325.7	P4HA1	prolyl 4-hydroxylase subunit alpha 1 [Source:NCBI gene;Acc:423704]	6	11904936	11935569	protein_coding	1		P4HA1
ENSGALG00000033256	-0.510567	4.23514	3.59917	0.0578084	0.658767	ENSGALG00000033256	ENSGALG00000033256.2	PCSK5	proprotein convertase subtilisin/kexin type 5 [Source:NCBI gene;Acc:395456]	Z	37074185	37334639	protein_coding	1	PCSK5	PCSK5
ENSGALG00000006503	0.555896	5.287	3.59128	0.0580835	0.661176	ENSGALG00000006503	ENSGALG00000006503.6	VDAC1	voltage dependent anion channel 1 [Source:NCBI gene;Acc:416320]	13	16693676	16748810	protein_coding	1		VDAC1
ENSGALG00000016556	1.22184	1.92265	3.59	0.0581283	0.661176	ENSGALG00000016556	ENSGALG00000016556.6		GTPase, very large interferon inducible pseudogene 1 [Source:NCBI gene;Acc:428660]	3	104955256	104962557	protein_coding	-1		GVINP1
ENSGALG00000007936	-0.584634	8.25632	3.58574	0.0582773	0.662252	ENSGALG00000007936	ENSGALG00000007936.4	PGK2	phosphoglycerate kinase 2 [Source:NCBI gene;Acc:395833]	4	12938400	12949670	protein_coding	1		PGK2
ENSGALG00000040498	0.732707	2.38152	3.58412	0.0583344	0.662283	ENSGALG00000040498	ENSGALG00000040498.2	SLC26A8	solute carrier family 26 member 8 [Source:NCBI gene;Acc:771137]	26	130061	146496	protein_coding	-1	SLC26A8	SLC26A8
ENSGALG00000033234	0.777061	1.06102	3.57888	0.0585185	0.662528	ENSGALG00000033234	ENSGALG00000033234.2	JAK3	Janus kinase 3 [Source:NCBI gene;Acc:395845]	28	3422187	3433690	pseudogene	-1		JAK3
ENSGALG00000000557	-0.918376	0.645065	3.57877	0.0585224	0.662528	ENSGALG00000000557	ENSGALG00000000557.6	ETNK2	ethanolamine kinase 2 [Source:NCBI gene;Acc:426690]	26	1717215	1724197	protein_coding	-1	ETNK2	ETNK2
ENSGALG00000051274	1.12447	1.28119	3.57816	0.0585441	0.662528	ENSGALG00000051274	ENSGALG00000051274.1	B3GALT2	beta-1,3-galactosyltransferase 2 [Source:NCBI gene;Acc:769122]	8	3820106	3828000	protein_coding	1	B3GALT2	B3GALT2
ENSGALG00000007707	-0.438817	5.36889	3.57732	0.0585735	0.662528	ENSGALG00000007707	ENSGALG00000007707.6	TRAPPC4	trafficking protein particle complex 4 [Source:NCBI gene;Acc:419788]	24	5665122	5667610	protein_coding	1		TRAPPC4
ENSGALG00000002710	0.726768	4.37293	3.57511	0.0586515	0.662795	ENSGALG00000002710	ENSGALG00000002710.6	IPMK	inositol polyphosphate multikinase [Source:NCBI gene;Acc:101751177]	6	5966532	5997073	protein_coding	1	IPMK	IPMK
ENSGALG00000037257	0.795005	2.67584	3.57282	0.0587325	0.662873	ENSGALG00000037257	ENSGALG00000037257.2	HLX	H2.0 like homeobox [Source:NCBI gene;Acc:107052956]	3	18695571	18698897	protein_coding	-1	HLX	HLX
ENSGALG00000002210	-0.651762	9.47259	3.56927	0.0588581	0.662873	ENSGALG00000002210	ENSGALG00000002210.6	PPIB	peptidylprolyl isomerase B (cyclophilin B) [Source:NCBI gene;Acc:396447]	10	1762469	1763840	protein_coding	1		PPIB
ENSGALG00000040702	0.565089	4.34944	3.56922	0.0588601	0.662873	ENSGALG00000040702	ENSGALG00000040702.2	BCKDHB	branched chain keto acid dehydrogenase E1, beta polypeptide [Source:NCBI gene;Acc:395375]	3	79052924	79163325	protein_coding	-1		BCKDHB
ENSGALG00000013253	0.929948	0.362486	3.56702	0.0589381	0.662873	ENSGALG00000013253	ENSGALG00000013253.6	INSRR	insulin receptor related receptor [Source:NCBI gene;Acc:100857811]	25	2589277	2598489	protein_coding	-1	INSRR	INSRR
ENSGALG00000016768	-0.577747	4.72346	3.56691	0.0589418	0.662873	ENSGALG00000016768	ENSGALG00000016768.6	LONRF2	LON peptidase N-terminal domain and ring finger 2 [Source:HGNC Symbol;Acc:HGNC:24788]	1	134355045	134386116	protein_coding	-1	LONRF2
ENSGALG00000013878	-0.491005	5.46923	3.5647	0.0590205	0.662873	ENSGALG00000013878	ENSGALG00000013878.5	PCYOX1	prenylcysteine oxidase 1 [Source:NCBI gene;Acc:426297]	22	4138675	4143999	protein_coding	1	PCYOX1	PCYOX1
ENSGALG00000030115	-0.621019	6.02523	3.56417	0.0590394	0.662873	ENSGALG00000030115	ENSGALG00000030115.3	WISP1	WNT1 inducible signaling pathway protein 1 [Source:NCBI gene;Acc:420322]	2	141922045	141957880	protein_coding	1		WISP1
ENSGALG00000006017	0.581927	4.41451	3.5578	0.0592662	0.664217	ENSGALG00000006017	ENSGALG00000006017.6	DOCK11	dedicator of cytokinesis 11 [Source:NCBI gene;Acc:422229]	4	3316455	3386100	protein_coding	1	DOCK11	DOCK11
ENSGALG00000030767	-0.970458	0.807749	3.55695	0.0592967	0.664217	ENSGALG00000030767	ENSGALG00000030767.3		transmembrane protein 68-like [Source:NCBI gene;Acc:421125]	2	111032635	111051679	protein_coding	-1		LOC421125
ENSGALG00000007731	-0.523934	4.05791	3.55622	0.0593226	0.664217	ENSGALG00000007731	ENSGALG00000007731.7	DPCD	deleted in primary ciliary dyskinesia homolog (mouse) [Source:NCBI gene;Acc:423852]	6	23757619	23765090	protein_coding	-1		DPCD
ENSGALG00000035266	-0.910422	4.45124	3.55185	0.059479	0.665356	ENSGALG00000035266	ENSGALG00000035266.2	ANOS1	anosmin 1 [Source:NCBI gene;Acc:396395]	1	127043815	127168755	protein_coding	1		ANOS1
ENSGALG00000014765	0.519634	4.56676	3.54933	0.0595695	0.665757	ENSGALG00000014765	ENSGALG00000014765.6	TRIM23	tripartite motif containing 23 [Source:NCBI gene;Acc:427164]	Z	20586231	20606756	protein_coding	-1	TRIM23	TRIM23
ENSGALG00000028685	-0.613498	4.79957	3.54644	0.0596735	0.665963	ENSGALG00000028685	ENSGALG00000028685.3	SEMA5A	semaphorin 5A [Source:NCBI gene;Acc:420931]	2	78655148	78914889	protein_coding	1	SEMA5A	SEMA5A
ENSGALG00000003547	-0.448983	6.15773	3.54512	0.0597208	0.665963	ENSGALG00000003547	ENSGALG00000003547.6	SKP2	S-phase kinase associated protein 2 [Source:NCBI gene;Acc:427437]	Z	10978967	10990022	protein_coding	1		SKP2
ENSGALG00000033885	0.8189	2.19996	3.54355	0.0597775	0.665963	ENSGALG00000033885	ENSGALG00000033885.2	RAP1GAP2	RAP1 GTPase activating protein 2 [Source:NCBI gene;Acc:427841]	19	9665263	9716788	protein_coding	1		RAP1GAP2
ENSGALG00000051954	0.579273	3.49501	3.54274	0.0598066	0.665963	ENSGALG00000051954	ENSGALG00000051954.1	RBM43	RNA binding motif protein 43 [Source:NCBI gene;Acc:424313]	7	35095688	35100528	protein_coding	-1	RBM43	RBM43
ENSGALG00000010813	-0.446895	5.57163	3.53748	0.0599964	0.667467	ENSGALG00000010813	ENSGALG00000010813.7	GOLGA5	golgin A5 [Source:NCBI gene;Acc:423419]	5	45034325	45050422	protein_coding	1	GOLGA5	GOLGA5
ENSGALG00000014128	-0.85339	5.1485	3.53302	0.0601581	0.668052	ENSGALG00000014128	ENSGALG00000014128.5	A4GALT	alpha 1,4-galactosyltransferase [Source:NCBI gene;Acc:418223]	1	68335336	68348032	protein_coding	-1		A4GALT
ENSGALG00000048565	-0.482738	4.95053	3.53301	0.0601587	0.668052	ENSGALG00000048565	ENSGALG00000048565.1	PRKCSH	uncharacterized LOC107050604 [Source:NCBI gene;Acc:107050604]	KZ626839.1	2009579	2022346	protein_coding	-1	PRKCSH	LOC107050604
ENSGALG00000041344	1.73621	3.51963	3.52554	0.0604301	0.670282	ENSGALG00000041344	ENSGALG00000041344.2	FABP5	fatty acid binding protein 5 [Source:NCBI gene;Acc:420197]	2	121272547	121278022	protein_coding	1		FABP5
ENSGALG00000021475	0.482742	5.40553	3.52446	0.0604695	0.670282	ENSGALG00000021475	ENSGALG00000021475.5	ADAR	adenosine deaminase, RNA specific [Source:NCBI gene;Acc:769675]	25	2955362	2966558	protein_coding	-1	ADAR	ADAR
ENSGALG00000015073	-0.501011	7.13097	3.52039	0.0606181	0.671317	ENSGALG00000015073	ENSGALG00000015073.6	TMEM39A	transmembrane protein 39A [Source:NCBI gene;Acc:418340]	1	81358311	81383483	protein_coding	-1	TMEM39A	TMEM39A
ENSGALG00000007226	-1.30927	5.50853	3.51293	0.0608917	0.673236	ENSGALG00000007226	ENSGALG00000007226.6	OSTN	osteocrin [Source:NCBI gene;Acc:424907]	9	13868182	13917246	protein_coding	-1		OSTN
ENSGALG00000001189	1.00178	1.96467	3.51265	0.0609018	0.673236	ENSGALG00000001189	ENSGALG00000001189.5	NCF1C	neutrophil cytosolic factor 1C pseudogene [Source:NCBI gene;Acc:417485]	19	2800480	2807394	protein_coding	-1		NCF1C
ENSGALG00000009031	0.599023	5.17284	3.50842	0.0610576	0.673759	ENSGALG00000009031	ENSGALG00000009031.7	SESTD1	SEC14 and spectrin domain containing 1 [Source:NCBI gene;Acc:424125]	7	15017686	15069511	protein_coding	1	SESTD1	SESTD1
ENSGALG00000012319	-0.593545	2.9827	3.50518	0.0611771	0.673759	ENSGALG00000012319	ENSGALG00000012319.7	SLC9B2	solute carrier family 9 member B2 [Source:NCBI gene;Acc:428776]	4	60955253	60970704	protein_coding	-1	SLC9B2	SLC9B2
ENSGALG00000004055	-0.428256	4.88496	3.50513	0.0611789	0.673759	ENSGALG00000004055	ENSGALG00000004055.7	C7orf50	chromosome 14 C7orf50 homolog [Source:NCBI gene;Acc:416455]	14	2679816	2775732	protein_coding	-1	C7orf50	C14H7orf50
ENSGALG00000051280	0.507044	4.43157	3.50214	0.0612897	0.673759	ENSGALG00000051280	ENSGALG00000051280.1	DNAJB1	dnaJ homolog subfamily B member 1-like [Source:NCBI gene;Acc:107049075]	30	875944	879908	protein_coding	-1	DNAJB1	LOC107049075
ENSGALG00000031656	0.975555	1.63709	3.49888	0.0614105	0.673759	ENSGALG00000031656	ENSGALG00000031656.2	EYA4	EYA transcriptional coactivator and phosphatase 4 [Source:NCBI gene;Acc:395716]	3	56480470	56633286	protein_coding	-1		EYA4
ENSGALG00000016471	0.509009	4.59257	3.49734	0.0614677	0.673759	ENSGALG00000016471	ENSGALG00000016471.7		5'-nucleotidase, cytosolic IB [Source:NCBI gene;Acc:421954]	3	100541466	100547451	protein_coding	-1		NT5C1B
ENSGALG00000016228	1.20371	0.566637	3.4969	0.0614837	0.673759	ENSGALG00000016228	ENSGALG00000016228.6	NYX	nyctalopin [Source:HGNC Symbol;Acc:HGNC:8082]	1	113301915	113303342	protein_coding	-1	NYX
ENSGALG00000013229	-0.485514	5.1013	3.49669	0.0614918	0.673759	ENSGALG00000013229	ENSGALG00000013229.7	CMAS	cytidine monophosphate N-acetylneuraminic acid synthetase [Source:NCBI gene;Acc:418199]	1	66843524	66853791	protein_coding	-1	CMAS	CMAS
ENSGALG00000000946	-0.454728	5.6154	3.49634	0.0615045	0.673759	ENSGALG00000000946	ENSGALG00000000946.6	PFDN1	prefoldin subunit 1 [Source:NCBI gene;Acc:416142]	13	2140881	2170325	protein_coding	-1		PFDN1
ENSGALG00000002445	0.473581	5.07241	3.49536	0.0615409	0.673759	ENSGALG00000002445	ENSGALG00000002445.6	KIAA0319L	KIAA0319 like [Source:NCBI gene;Acc:419634]	23	4459155	4486555	protein_coding	1	KIAA0319L	KIAA0319L
ENSGALG00000054182	1.16461	1.63881	3.49492	0.0615575	0.673759	ENSGALG00000054182	ENSGALG00000054182.1			1	136223868	136229368	lncRNA	-1
ENSGALG00000031615	-1.13004	2.17211	3.48866	0.0617907	0.675704	ENSGALG00000031615	ENSGALG00000031615.3	FAIM2	Fas apoptotic inhibitory molecule 2 [Source:NCBI gene;Acc:426899]	33	5144398	5159038	protein_coding	1	FAIM2	FAIM2
ENSGALG00000035626	-0.534195	7.26296	3.48688	0.0618571	0.675824	ENSGALG00000035626	ENSGALG00000035626.2	DAD1	defender against cell death 1 [Source:NCBI gene;Acc:395343]	27	2275923	2278771	protein_coding	1		DAD1
ENSGALG00000001727	0.935927	0.837351	3.48499	0.0619276	0.675988	ENSGALG00000001727	ENSGALG00000001727.5	LZTS1	leucine zipper tumor suppressor 1 [Source:NCBI gene;Acc:431331]	22	1887126	1890661	protein_coding	1	LZTS1	LZTS1
ENSGALG00000005781	-0.521377	6.76037	3.47888	0.0621568	0.677882	ENSGALG00000005781	ENSGALG00000005781.6	ARFGAP1	ADP ribosylation factor GTPase activating protein 1 [Source:NCBI gene;Acc:419241]	20	8784838	8801814	protein_coding	1		ARFGAP1
ENSGALG00000011241	0.685239	3.9749	3.47058	0.0624693	0.679787	ENSGALG00000011241	ENSGALG00000011241.6	RFTN1	raftlin, lipid raft linker 1 [Source:NCBI gene;Acc:395109]	2	34320041	34414155	protein_coding	-1		RFTN1
ENSGALG00000028696	-0.457328	5.4523	3.47052	0.0624717	0.679787	ENSGALG00000028696	ENSGALG00000028696.3	FTL	ferritin, light polypeptide [Source:NCBI gene;Acc:378899]	5	12387716	12391494	protein_coding	1		FTL
ENSGALG00000014192	0.772249	2.31324	3.46614	0.0626374	0.679787	ENSGALG00000014192	ENSGALG00000014192.5	ATP10D	ATPase phospholipid transporting 10D (putative) [Source:NCBI gene;Acc:422768]	4	66765329	66794720	protein_coding	-1	ATP10D	ATP10D
ENSGALG00000054048	0.538939	3.49327	3.46589	0.062647	0.679787	ENSGALG00000054048	ENSGALG00000054048.1		transmembrane protein 211-like [Source:NCBI gene;Acc:101749175]	19	6867165	6920815	protein_coding	-1		LOC101749175
ENSGALG00000036915	-0.594224	4.64188	3.46515	0.0626747	0.679787	ENSGALG00000036915	ENSGALG00000036915.3	SQLE	squalene epoxidase [Source:NCBI gene;Acc:420335]	2	138683095	138697225	protein_coding	1		SQLE
ENSGALG00000003952	-1.06826	2.28445	3.46469	0.0626922	0.679787	ENSGALG00000003952	ENSGALG00000003952.6	RBPJL	recombination signal binding protein for immunoglobulin kappa J region like [Source:NCBI gene;Acc:419185]	20	5148004	5151439	protein_coding	-1	RBPJL	RBPJL
ENSGALG00000036293	-0.442866	6.20273	3.4639	0.0627221	0.679787	ENSGALG00000036293	ENSGALG00000036293.3	EBAG9	estrogen receptor binding site associated, antigen, 9 [Source:NCBI gene;Acc:420276]	2	132562852	132582862	protein_coding	1		EBAG9
ENSGALG00000031542	-0.434995	5.52564	3.45995	0.0628722	0.680808	ENSGALG00000031542	ENSGALG00000031542.3	EXT2	exostosin glycosyltransferase 2 [Source:NCBI gene;Acc:425859]	5	21966267	22035594	protein_coding	1		EXT2
ENSGALG00000026443	0.62871	3.10689	3.45587	0.0630277	0.681885	ENSGALG00000026443	ENSGALG00000026443.3	RNF44	ring finger protein 44 [Source:NCBI gene;Acc:416224]	13	11084545	11095710	protein_coding	1	RNF44	RNF44
ENSGALG00000051082	0.943833	2.85946	3.45284	0.0631433	0.682531	ENSGALG00000051082	ENSGALG00000051082.1			3	64898746	64898951	protein_coding	-1
ENSGALG00000006568	-0.449821	5.56835	3.44914	0.0632848	0.683453	ENSGALG00000006568	ENSGALG00000006568.6	TM9SF4	transmembrane 9 superfamily member 4 [Source:NCBI gene;Acc:419281]	20	10113124	10127346	protein_coding	1	TM9SF4	TM9SF4
ENSGALG00000049348	-0.472993	4.30339	3.44551	0.0634237	0.68419	ENSGALG00000049348	ENSGALG00000049348.1		phosphohistidine phosphatase 1 [Source:NCBI gene;Acc:424401]	8	5472671	5478090	protein_coding	-1		LOC424401
ENSGALG00000003299	0.5514	5.43162	3.44443	0.0634653	0.68419	ENSGALG00000003299	ENSGALG00000003299.7	NSD3	Wolf-Hirschhorn syndrome candidate 1-like 1 [Source:NCBI gene;Acc:426778]	22	2604802	2634066	protein_coding	-1	NSD3	WHSC1L1
ENSGALG00000001711	0.632258	3.9182	3.43607	0.0637871	0.686718	ENSGALG00000001711	ENSGALG00000001711.7	PPCDC	phosphopantothenoylcysteine decarboxylase [Source:NCBI gene;Acc:427477]	10	2810721	2835077	protein_coding	-1	PPCDC	PPCDC
ENSGALG00000049529	-0.75563	9.50583	3.43316	0.0638996	0.686718	ENSGALG00000049529	ENSGALG00000049529.1			1	86110412	86147612	protein_coding	-1
ENSGALG00000029829	-0.746487	2.6683	3.43275	0.0639156	0.686718	ENSGALG00000029829	ENSGALG00000029829.2	RNLS	renalase, FAD-dependent amine oxidase [Source:NCBI gene;Acc:423674]	6	10115541	10178635	protein_coding	1		RNLS
ENSGALG00000049356	0.955264	0.930824	3.4325	0.0639253	0.686718	ENSGALG00000049356	ENSGALG00000049356.1			14	9466527	9473409	protein_coding	-1
ENSGALG00000006958	-1.10281	9.19532	3.42493	0.0642189	0.688788	ENSGALG00000006958	ENSGALG00000006958.6		collagen type XXVII alpha 1 chain [Source:NCBI gene;Acc:417231]	17	5031761	5159465	protein_coding	1		COL27A1
ENSGALG00000003011	0.891009	2.43177	3.42141	0.064356	0.688788	ENSGALG00000003011	ENSGALG00000003011.6	TOM1L1	target of myb1 like 1 membrane trafficking protein [Source:NCBI gene;Acc:417391]	18	5812118	5833003	protein_coding	1	TOM1L1	TOM1L1
ENSGALG00000003282	0.476232	6.68421	3.42103	0.064371	0.688788	ENSGALG00000003282	ENSGALG00000003282.6	STAT5A	signal transducer and activator of transcription 5A [Source:NCBI gene;Acc:395556]	27	7694496	7699792	protein_coding	-1		STAT5A
ENSGALG00000038848	-0.96562	1.0219	3.42028	0.0644001	0.688788	ENSGALG00000038848	ENSGALG00000038848.3	MSX2	msh homeobox 2 [Source:NCBI gene;Acc:395245]	13	10514513	10519859	protein_coding	1		MSX2
ENSGALG00000052658	0.560101	3.20834	3.41886	0.0644557	0.688788	ENSGALG00000052658	ENSGALG00000052658.1			2	145637251	145647491	lncRNA	-1
ENSGALG00000007170	-0.433192	4.7972	3.41881	0.0644573	0.688788	ENSGALG00000007170	ENSGALG00000007170.6	SNRPA1	small nuclear ribonucleoprotein polypeptide A' [Source:NCBI gene;Acc:415523]	10	18059065	18064217	protein_coding	-1		SNRPA1
ENSGALG00000037998	-0.581727	3.63143	3.41538	0.0645914	0.689114	ENSGALG00000037998	ENSGALG00000037998.3	GLTP	glycolipid transfer protein [Source:NCBI gene;Acc:429534]	15	7141836	7143997	protein_coding	-1		GLTP
ENSGALG00000013882	0.490097	4.84298	3.41389	0.06465	0.689114	ENSGALG00000013882	ENSGALG00000013882.6	MXD1	MAX dimerization protein 1 [Source:NCBI gene;Acc:426299]	22	4110333	4118011	protein_coding	1		MXD1
ENSGALG00000013297	-0.650282	3.84266	3.4137	0.0646575	0.689114	ENSGALG00000013297	ENSGALG00000013297.7	BBOX1	gamma-butyrobetaine hydroxylase 1 [Source:NCBI gene;Acc:426932]	5	3749262	3782806	protein_coding	1	BBOX1	BBOX1
ENSGALG00000031590	-0.806725	0.736749	3.40731	0.0649081	0.69118	ENSGALG00000031590	ENSGALG00000031590.2	B3GAT2	beta-1,3-glucuronyltransferase 2 [Source:NCBI gene;Acc:428638]	3	82531592	82553686	protein_coding	1		B3GAT2
ENSGALG00000002987	-0.596358	6.61295	3.40434	0.0650251	0.691822	ENSGALG00000002987	ENSGALG00000002987.6	SERPINF2	serpin family F member 2 [Source:NCBI gene;Acc:100857105]	19	5543842	5551420	protein_coding	1	SERPINF2	SERPINF2
ENSGALG00000031997	-1.37548	5.3861	3.39942	0.0652195	0.692335	ENSGALG00000031997	ENSGALG00000031997.2	SFRP4	secreted frizzled related protein 4 [Source:NCBI gene;Acc:420732]	2	46095977	46105425	protein_coding	1	SFRP4	SFRP4
ENSGALG00000034007	0.554714	3.73999	3.39737	0.0653005	0.692335	ENSGALG00000034007	ENSGALG00000034007.3	ITGA6	integrin subunit alpha 6 [Source:NCBI gene;Acc:396226]	7	17715353	17831994	protein_coding	-1		ITGA6
ENSGALG00000009239	0.875903	0.815173	3.3954	0.0653785	0.692335	ENSGALG00000009239	ENSGALG00000009239.6	TLR2B	toll-like receptor 2 family member B [Source:NCBI gene;Acc:769014]	4	20021540	20038962	protein_coding	1		TLR2B
ENSGALG00000000776	0.498679	3.81988	3.3937	0.0654461	0.692335	ENSGALG00000000776	ENSGALG00000000776.6	BRPF3	bromodomain and PHD finger containing, 3 [Source:NCBI gene;Acc:421182]	26	192701	216901	protein_coding	1	BRPF3	BRPF3
ENSGALG00000052945	0.537495	3.6178	3.39355	0.065452	0.692335	ENSGALG00000052945	ENSGALG00000052945.1			33	6904667	6912391	protein_coding	1
ENSGALG00000007305	-0.870101	0.931949	3.39308	0.0654706	0.692335	ENSGALG00000007305	ENSGALG00000007305.5	NME1	NME/NM23 nucleoside diphosphate kinase 1 [Source:NCBI gene;Acc:422094]	18	9976818	9980677	protein_coding	-1		NME1
ENSGALG00000011689	-0.46144	6.55403	3.39306	0.0654712	0.692335	ENSGALG00000011689	ENSGALG00000011689.6	PDIA5	protein disulfide isomerase family A member 5 [Source:NCBI gene;Acc:424249]	7	26824064	26916163	protein_coding	1	PDIA5	PDIA5
ENSGALG00000043971	-0.473045	4.85013	3.39154	0.0655315	0.692372	ENSGALG00000043971	ENSGALG00000043971.2		UDP-galactose translocator-like [Source:NCBI gene;Acc:107050985]	13	613317	618879	protein_coding	-1		LOC107050985
ENSGALG00000009429	0.63046	3.1149	3.38817	0.0656659	0.69319	ENSGALG00000009429	ENSGALG00000009429.7	RXFP1	relaxin/insulin like family peptide receptor 1 [Source:NCBI gene;Acc:422415]	4	21878289	21927832	protein_coding	1	RXFP1	RXFP1
ENSGALG00000003412	0.584931	4.48202	3.38226	0.0659016	0.693993	ENSGALG00000003412	ENSGALG00000003412.6		ral guanine nucleotide dissociation stimulator like 4 [Source:NCBI gene;Acc:427758]	17	7090031	7108362	protein_coding	-1		RGL4
ENSGALG00000016681	0.520431	4.2707	3.38176	0.0659218	0.693993	ENSGALG00000016681	ENSGALG00000016681.7	ZBED1	dehydrogenase/reductase X-linked [Source:NCBI gene;Acc:428007]	1	129980985	130145449	protein_coding	1	ZBED1	DHRSX
ENSGALG00000019233	-1.3269	3.35737	3.37922	0.0660233	0.693993	ENSGALG00000019233	ENSGALG00000019233.5		phospholipase A2 group X-like [Source:NCBI gene;Acc:418356]	1	83879170	83892733	protein_coding	-1		PLA2G10L
ENSGALG00000009654	-0.516873	5.50649	3.37914	0.0660265	0.693993	ENSGALG00000009654	ENSGALG00000009654.7		myeloid leukemia factor 1 [Source:NCBI gene;Acc:425019]	9	22621538	22635771	protein_coding	-1		MLF1
ENSGALG00000035604	-0.473466	5.66557	3.37913	0.0660268	0.693993	ENSGALG00000035604	ENSGALG00000035604.3	USB1	U6 snRNA biogenesis 1 [Source:NCBI gene;Acc:415628]	11	449045	453768	protein_coding	-1	USB1	USB1
ENSGALG00000049654	-0.972528	1.02813	3.37522	0.0661838	0.695044	ENSGALG00000049654	ENSGALG00000049654.1	VWA3A	von Willebrand factor A domain containing 3A [Source:NCBI gene;Acc:416616]	14	8980220	9008446	protein_coding	1	VWA3A	VWA3A
ENSGALG00000037506	0.685143	2.55205	3.37372	0.066244	0.695077	ENSGALG00000037506	ENSGALG00000037506.2	SIPA1L2	signal induced proliferation associated 1 like 2 [Source:NCBI gene;Acc:421523]	3	39259121	39362915	protein_coding	1	SIPA1L2	SIPA1L2
ENSGALG00000041296	0.714965	2.97671	3.37194	0.0663157	0.695231	ENSGALG00000041296	ENSGALG00000041296.3		SRY-box 7 [Source:NCBI gene;Acc:771337]	3	106816449	106818809	protein_coding	-1		SOX7
ENSGALG00000037286	0.851429	1.26262	3.36756	0.0664923	0.696483	ENSGALG00000037286	ENSGALG00000037286.2	VIL1	villin 1 [Source:NCBI gene;Acc:396423]	7	22534108	22539376	protein_coding	-1		VIL1
ENSGALG00000019276	-0.940352	1.67576	3.36229	0.0667052	0.698085	ENSGALG00000019276	ENSGALG00000019276.5		solute carrier organic anion transporter family member 1B1 [Source:NCBI gene;Acc:418189]	1	65193673	65214941	protein_coding	-1		SLCO1B1
ENSGALG00000034971	0.818456	1.86359	3.36094	0.0667599	0.698085	ENSGALG00000034971	ENSGALG00000034971.2	SLC45A4	solute carrier family 45 member 4 [Source:NCBI gene;Acc:420308]	2	146035610	146065241	protein_coding	-1	SLC45A4	SLC45A4
ENSGALG00000004087	-0.527943	4.50446	3.35535	0.0669871	0.699347	ENSGALG00000004087	ENSGALG00000004087.7	THSD4	thrombospondin type 1 domain containing 4 [Source:NCBI gene;Acc:415395]	10	6784258	7036593	protein_coding	1	THSD4	THSD4
ENSGALG00000012338	-0.504199	5.48641	3.35514	0.0669954	0.699347	ENSGALG00000012338	ENSGALG00000012338.5	BDH2	3-hydroxybutyrate dehydrogenase, type 2 [Source:NCBI gene;Acc:422715]	4	60973338	60987632	protein_coding	-1	BDH2	BDH2
ENSGALG00000005823	-0.68097	10.2876	3.35137	0.0671492	0.700011	ENSGALG00000005823	ENSGALG00000005823.7	HDLBP	high density lipoprotein binding protein [Source:NCBI gene;Acc:395984]	9	5116399	5150308	protein_coding	-1		HDLBP
ENSGALG00000040793	-0.579419	8.44877	3.35004	0.0672036	0.700011	ENSGALG00000040793	ENSGALG00000040793.2	KDELR2	KDEL endoplasmic reticulum protein retention receptor 2 [Source:NCBI gene;Acc:771927]	14	9192165	9204073	protein_coding	1		KDELR2
ENSGALG00000015842	0.801083	2.65183	3.34849	0.0672668	0.700011	ENSGALG00000015842	ENSGALG00000015842.5	TIAM1	T-cell lymphoma invasion and metastasis 1 [Source:NCBI gene;Acc:418491]	1	105805720	105885857	protein_coding	-1	TIAM1	TIAM1
ENSGALG00000010979	0.523413	4.05522	3.34622	0.0673597	0.700011	ENSGALG00000010979	ENSGALG00000010979.7		hydroxysteroid 17-beta dehydrogenase 11 [Source:NCBI gene;Acc:422588]	4	45715041	45720203	protein_coding	1		HSD17B11
ENSGALG00000032234	0.405437	4.83433	3.34577	0.0673778	0.700011	ENSGALG00000032234	ENSGALG00000032234.3	MARCH5	membrane associated ring-CH-type finger 5 [Source:NCBI gene;Acc:423815]	6	21783366	21806151	protein_coding	-1		MARCH5
ENSGALG00000039704	-0.511343	6.88318	3.34514	0.0674037	0.700011	ENSGALG00000039704	ENSGALG00000039704.2	SEC22B	SEC22 homolog B, vesicle trafficking protein [Source:NCBI gene;Acc:424377]	8	4531000	4539897	protein_coding	1		SEC22B
ENSGALG00000043734	-0.693762	4.998	3.33884	0.0676625	0.70171	ENSGALG00000043734	ENSGALG00000043734.2	LIPG	lipase G, endothelial type [Source:NCBI gene;Acc:426846]	Z	1061896	1069535	protein_coding	-1	LIPG	LIPG
ENSGALG00000008349	-0.466324	5.30376	3.33645	0.0677605	0.70171	ENSGALG00000008349	ENSGALG00000008349.6	LMCD1	LIM and cysteine rich domains 1 [Source:NCBI gene;Acc:416113]	12	19629856	19651438	protein_coding	1	LMCD1	LMCD1
ENSGALG00000001702	-0.537691	4.21291	3.33615	0.0677731	0.70171	ENSGALG00000001702	ENSGALG00000001702.6	EXOC3L1	exocyst complex component 3 like 1 [Source:NCBI gene;Acc:769364]	11	979152	987407	protein_coding	-1	EXOC3L1	EXOC3L1
ENSGALG00000009463	0.429979	4.77227	3.33501	0.0678202	0.70171	ENSGALG00000009463	ENSGALG00000009463.5	DCAF5	DDB1 and CUL4 associated factor 5 [Source:NCBI gene;Acc:428876]	5	28339648	28406328	protein_coding	1	DCAF5	DCAF5
ENSGALG00000008844	-0.650272	7.50611	3.33313	0.0678977	0.70171	ENSGALG00000008844	ENSGALG00000008844.7	SLC31A1	solute carrier family 31 member 1 [Source:NCBI gene;Acc:417268]	17	1846199	1870295	protein_coding	-1		SLC31A1
ENSGALG00000021405	0.513842	3.84056	3.33002	0.0680259	0.70171	ENSGALG00000021405	ENSGALG00000021405.6			15	5927685	5935203	lncRNA	-1
ENSGALG00000033855	-0.476524	5.84238	3.32947	0.0680489	0.70171	ENSGALG00000033855	ENSGALG00000033855.2	GOLT1B	golgi transport 1B [Source:NCBI gene;Acc:418192]	1	65337341	65349940	protein_coding	1	GOLT1B	GOLT1B
ENSGALG00000027046	0.431127	5.35934	3.32551	0.068213	0.70171	ENSGALG00000027046	ENSGALG00000027046.3	INTS3	integrator complex subunit 3 [Source:NCBI gene;Acc:771890]	25	3364117	3395057	protein_coding	1	INTS3	INTS3
ENSGALG00000005442	0.662967	3.6245	3.32545	0.0682155	0.70171	ENSGALG00000005442	ENSGALG00000005442.6	PALMD	palmdelphin [Source:NCBI gene;Acc:424475]	8	12531463	12557002	protein_coding	-1		PALMD
ENSGALG00000016919	1.06678	1.66357	3.32528	0.0682226	0.70171	ENSGALG00000016919	ENSGALG00000016919.5	ACOD1	aconitate decarboxylase 1 [Source:NCBI gene;Acc:418812]	1	155850483	155873611	protein_coding	-1		ACOD1
ENSGALG00000016906	0.589654	3.63501	3.32504	0.0682323	0.70171	ENSGALG00000016906	ENSGALG00000016906.7	SPRY2	sprouty RTK signaling antagonist 2 [Source:NCBI gene;Acc:395584]	1	154055398	154060716	protein_coding	1		SPRY2
ENSGALG00000006083	-0.599971	3.339	3.32441	0.0682586	0.70171	ENSGALG00000006083	ENSGALG00000006083.6		lamin-L(III)-like [Source:NCBI gene;Acc:415464]	10	11903990	11918958	protein_coding	-1		LMINA
ENSGALG00000043208	0.528988	4.86317	3.3209	0.0684045	0.701959	ENSGALG00000043208	ENSGALG00000043208.3	TRAFD1	TRAF-type zinc finger domain containing 1 [Source:NCBI gene;Acc:416884]	15	6590284	6599691	protein_coding	1		TRAFD1
ENSGALG00000038364	-0.989905	10.1335	3.32016	0.0684353	0.701959	ENSGALG00000038364	ENSGALG00000038364.3	CCN3	nephroblastoma overexpressed [Source:NCBI gene;Acc:396204]	2	136482292	136487586	protein_coding	1		CCN3
ENSGALG00000032313	-0.579688	8.01862	3.31882	0.0684908	0.701959	ENSGALG00000032313	ENSGALG00000032313.3	KDELR3	KDEL endoplasmic reticulum protein retention receptor 3 [Source:NCBI gene;Acc:418026]	1	50897173	50902317	protein_coding	-1		KDELR3
ENSGALG00000003015	0.986107	8.77506	3.31828	0.0685133	0.701959	ENSGALG00000003015	ENSGALG00000003015.6	SERPINF1	serpin family F member 1 [Source:NCBI gene;Acc:417561]	19	5554574	5561459	protein_coding	1		SERPINF1
ENSGALG00000012798	-0.65455	8.7311	3.31575	0.0686191	0.702452	ENSGALG00000012798	ENSGALG00000012798.7	SSR1	signal sequence receptor subunit 1 [Source:NCBI gene;Acc:420871]	2	64623377	64634226	protein_coding	1		SSR1
ENSGALG00000030376	-0.498032	7.16915	3.31155	0.0687947	0.70364	ENSGALG00000030376	ENSGALG00000030376.3	DHRS3	dehydrogenase/reductase 3 [Source:NCBI gene;Acc:419480]	21	5314485	5343907	protein_coding	1		DHRS3
ENSGALG00000012849	-0.427444	5.29172	3.3096	0.0688765	0.70364	ENSGALG00000012849	ENSGALG00000012849.5	SLC37A3	solute carrier family 37 member 3 [Source:NCBI gene;Acc:418112]	1	56750744	56771091	protein_coding	-1		SLC37A3
ENSGALG00000009990	-0.451281	4.98518	3.30787	0.0689487	0.70364	ENSGALG00000009990	ENSGALG00000009990.6	SRBD1	S1 RNA binding domain 1 [Source:NCBI gene;Acc:421408]	3	26195862	26317142	protein_coding	-1	SRBD1	SRBD1
ENSGALG00000006252	-0.549829	7.13718	3.30746	0.0689662	0.70364	ENSGALG00000006252	ENSGALG00000006252.6	LMO4	LIM domain only 4 [Source:NCBI gene;Acc:373901]	8	16116468	16130653	protein_coding	-1		LMO4
ENSGALG00000011005	-0.686783	6.41768	3.30526	0.0690584	0.703679	ENSGALG00000011005	ENSGALG00000011005.5	KCNK1	potassium two pore domain channel subfamily K member 7 [Source:NCBI gene;Acc:421519]	3	38762090	38790863	protein_coding	-1	KCNK1	KCNK7
ENSGALG00000010974	-0.613053	4.16955	3.30462	0.0690855	0.703679	ENSGALG00000010974	ENSGALG00000010974.5	GSC	goosecoid homeobox [Source:NCBI gene;Acc:396273]	5	45910321	45911817	protein_coding	-1		GSC
ENSGALG00000034487	-0.666063	5.22245	3.30222	0.0691861	0.704115	ENSGALG00000034487	ENSGALG00000034487.3	IMPA1	inositol monophosphatase 1 [Source:NCBI gene;Acc:420199]	2	121389232	121401025	protein_coding	-1	IMPA1	IMPA1
ENSGALG00000006868	-0.625221	4.1726	3.29879	0.0693309	0.704999	ENSGALG00000006868	ENSGALG00000006868.7	CRACR2B	calcium release activated channel regulator 2B [Source:HGNC Symbol;Acc:HGNC:28703]	5	15928417	15957238	protein_coding	-1	CRACR2B
ENSGALG00000032974	-0.669294	6.96207	3.29705	0.0694045	0.705159	ENSGALG00000032974	ENSGALG00000032974.3	ADAMTS2	ADAM metallopeptidase with thrombospondin type 1 motif 2 [Source:NCBI gene;Acc:416291]	13	14367414	14532703	protein_coding	1	ADAMTS2	ADAMTS2
ENSGALG00000036477	-0.463694	6.67155	3.29488	0.0694962	0.705406	ENSGALG00000036477	ENSGALG00000036477.3	CHPF2	chondroitin polymerizing factor 2 [Source:NCBI gene;Acc:426039]	2	154470	159009	protein_coding	-1	CHPF2	CHPF2
ENSGALG00000012640	-0.524407	7.8648	3.2929	0.0695801	0.705406	ENSGALG00000012640	ENSGALG00000012640.2	TMEM263	transmembrane protein 263 [Source:NCBI gene;Acc:418068]	1	53635743	53648531	protein_coding	-1		TMEM263
ENSGALG00000050814	0.693803	2.0798	3.29237	0.0696026	0.705406	ENSGALG00000050814	ENSGALG00000050814.1		patched domain containing 3 [Source:NCBI gene;Acc:428417]	2	15910728	15919796	protein_coding	1		PTCHD3
ENSGALG00000008563	-0.510461	5.26624	3.28877	0.0697551	0.705824	ENSGALG00000008563	ENSGALG00000008563.7	ENTPD6	ectonucleoside triphosphate diphosphohydrolase 6 (putative) [Source:NCBI gene;Acc:416708]	3	16177804	16189143	protein_coding	1		ENTPD6
ENSGALG00000008059	-0.423456	5.30402	3.28867	0.0697597	0.705824	ENSGALG00000008059	ENSGALG00000008059.6	ASCC2	activating signal cointegrator 1 complex subunit 2 [Source:NCBI gene;Acc:417016]	15	11292842	11317278	protein_coding	1	ASCC2	ASCC2
ENSGALG00000013409	1.01558	1.45249	3.28715	0.069824	0.705889	ENSGALG00000013409	ENSGALG00000013409.6			23	2220746	2229123	protein_coding	1
ENSGALG00000014213	0.80692	2.57188	3.28118	0.0700786	0.707401	ENSGALG00000014213	ENSGALG00000014213.6	PRR5	proline rich 5 [Source:NCBI gene;Acc:418237]	1	69701235	69786844	protein_coding	1		PRR5
ENSGALG00000053675	0.599371	3.82353	3.27775	0.0702253	0.707401	ENSGALG00000053675	ENSGALG00000053675.1			2	128172384	128183850	protein_coding	1
ENSGALG00000048029	0.986306	1.22429	3.27685	0.0702635	0.707401	ENSGALG00000048029	ENSGALG00000048029.1			Z	9447204	9450366	lncRNA	1
ENSGALG00000048674	-0.534351	6.19727	3.27653	0.0702774	0.707401	ENSGALG00000048674	ENSGALG00000048674.1			1	65422008	65425466	lncRNA	1
ENSGALG00000001621	0.603455	3.87858	3.27599	0.0703004	0.707401	ENSGALG00000001621	ENSGALG00000001621.5	CLDN5	claudin 5 [Source:NCBI gene;Acc:374028]	15	996735	998492	protein_coding	-1		CLDN5
ENSGALG00000002761	0.481605	5.06459	3.27494	0.0703456	0.707401	ENSGALG00000002761	ENSGALG00000002761.7	SIRT1	sirtuin 1 [Source:NCBI gene;Acc:423646]	6	7315727	7337324	protein_coding	-1		SIRT1
ENSGALG00000009466	-0.460502	5.50717	3.27333	0.0704144	0.707401	ENSGALG00000009466	ENSGALG00000009466.7	SEC23IP	SEC23 interacting protein [Source:NCBI gene;Acc:423934]	6	31321086	31337575	protein_coding	1	SEC23IP	SEC23IP
ENSGALG00000040519	-0.580172	5.69217	3.27102	0.0705139	0.707401	ENSGALG00000040519	ENSGALG00000040519.3	PEF1	penta-EF-hand domain containing 1 [Source:NCBI gene;Acc:419644]	23	5114632	5116781	protein_coding	-1	PEF1	PEF1
ENSGALG00000004378	0.436963	4.31694	3.27018	0.0705501	0.707401	ENSGALG00000004378	ENSGALG00000004378.5	ASB6	ankyrin repeat and SOCS box containing 6 [Source:NCBI gene;Acc:417194]	17	5945702	5950760	protein_coding	-1		ASB6
ENSGALG00000028265	-0.526841	8.16455	3.26881	0.0706089	0.707401	ENSGALG00000028265	ENSGALG00000028265.4	SURF4	surfeit 4 [Source:NCBI gene;Acc:374273]	17	7176124	7189309	protein_coding	-1		SURF4
ENSGALG00000039685	0.48817	4.18746	3.26873	0.0706123	0.707401	ENSGALG00000039685	ENSGALG00000039685.2	GMEB2	glucocorticoid modulatory element binding protein 2 [Source:NCBI gene;Acc:419264]	20	9717686	9728495	protein_coding	1	GMEB2	GMEB2
ENSGALG00000036850	0.513803	5.73232	3.2673	0.0706738	0.707435	ENSGALG00000036850	ENSGALG00000036850.2	DNAJA4	DnaJ heat shock protein family (Hsp40) member A4 [Source:NCBI gene;Acc:415360]	10	4188720	4194426	protein_coding	-1	DNAJA4	DNAJA4
ENSGALG00000003554	-0.871559	1.40318	3.26353	0.0708366	0.707846	ENSGALG00000003554	ENSGALG00000003554.5	OPTC	opticin [Source:NCBI gene;Acc:395130]	26	5176373	5179960	protein_coding	1		OPTC
ENSGALG00000003475	-0.507777	6.22715	3.26205	0.0709004	0.707846	ENSGALG00000003475	ENSGALG00000003475.7	ACLY	ATP citrate lyase [Source:NCBI gene;Acc:395373]	27	7521200	7545007	protein_coding	-1		ACLY
ENSGALG00000010061	-0.440738	4.9647	3.26193	0.0709058	0.707846	ENSGALG00000010061	ENSGALG00000010061.6	LRBA	LPS responsive beige-like anchor protein [Source:NCBI gene;Acc:422476]	4	32846926	33218988	protein_coding	-1	LRBA	LRBA
ENSGALG00000039710	0.511563	5.56486	3.26097	0.0709473	0.707846	ENSGALG00000039710	ENSGALG00000039710.2	HDAC7	histone deacetylase 7 [Source:NCBI gene;Acc:426885]	33	5847783	5910234	protein_coding	1		HDAC7
ENSGALG00000014140	-0.477293	6.70865	3.25667	0.0711334	0.708801	ENSGALG00000014140	ENSGALG00000014140.7	ARFGAP3	ADP ribosylation factor GTPase activating protein 3 [Source:NCBI gene;Acc:418224]	1	68365225	68398932	protein_coding	-1		ARFGAP3
ENSGALG00000015388	0.83374	1.15627	3.25607	0.0711594	0.708801	ENSGALG00000015388	ENSGALG00000015388.6	PRDM1	PR/SET domain 1 [Source:NCBI gene;Acc:445340]	3	68350477	68445504	protein_coding	-1	PRDM1	PRDM1
ENSGALG00000009943	0.500234	5.45855	3.24785	0.0715173	0.710619	ENSGALG00000009943	ENSGALG00000009943.6	FAM117A	family with sequence similarity 117 member A [Source:NCBI gene;Acc:112530395]	27	5717774	5744311	protein_coding	1	FAM117A	FAM117A
ENSGALG00000003805	-0.534388	4.95122	3.24774	0.071522	0.710619	ENSGALG00000003805	ENSGALG00000003805.6		protein kinase, cGMP-dependent, type I [Source:NCBI gene;Acc:423682]	6	10769461	10913135	protein_coding	1		PRKG1
ENSGALG00000052689	0.794959	1.40689	3.24656	0.0715736	0.710619	ENSGALG00000052689	ENSGALG00000052689.1		ataxin-2-like protein [Source:NCBI gene;Acc:107050235]	25	3971454	3980590	protein_coding	-1		LOC107050235
ENSGALG00000033966	-0.552897	3.95789	3.2465	0.0715761	0.710619	ENSGALG00000033966	ENSGALG00000033966.2	TENM4	teneurin transmembrane protein 4 [Source:NCBI gene;Acc:395406]	1	193461898	193803700	protein_coding	1		TENM4
ENSGALG00000048328	-0.523162	5.76244	3.24404	0.0716836	0.710619	ENSGALG00000048328	ENSGALG00000048328.1			1	831763	833772	lncRNA	-1
ENSGALG00000007691	-0.479817	4.49247	3.24385	0.0716919	0.710619	ENSGALG00000007691	ENSGALG00000007691.7	ARMC9	armadillo repeat containing 9 [Source:NCBI gene;Acc:424929]	9	15359987	15403232	protein_coding	1	ARMC9	ARMC9
ENSGALG00000012074	0.802393	1.9819	3.23448	0.0721033	0.713447	ENSGALG00000012074	ENSGALG00000012074.6	ALPK1	alpha kinase 1 [Source:NCBI gene;Acc:100858173]	4	57133859	57167350	protein_coding	-1	ALPK1	ALPK1
ENSGALG00000002326	-0.56729	5.99899	3.23304	0.0721664	0.713447	ENSGALG00000002326	ENSGALG00000002326.6		ATPase phospholipid transporting 8B4 (putative) [Source:NCBI gene;Acc:431656]	Z	8885670	8943726	protein_coding	1		ATP8B4
ENSGALG00000010486	-1.29791	2.11378	3.23165	0.0722281	0.713447	ENSGALG00000010486	ENSGALG00000010486.6	JAKMIP3	Janus kinase and microtubule interacting protein 3 [Source:NCBI gene;Acc:428991]	6	35793460	35816831	protein_coding	1	JAKMIP3	JAKMIP3
ENSGALG00000015693	0.439011	5.14994	3.23104	0.072255	0.713447	ENSGALG00000015693	ENSGALG00000015693.6	USP25	ubiquitin specific peptidase 25 [Source:NCBI gene;Acc:418471]	1	99983468	100073181	protein_coding	1	USP25	USP25
ENSGALG00000003886	-0.682832	3.72211	3.23013	0.0722949	0.713447	ENSGALG00000003886	ENSGALG00000003886.7	SGCD	sarcoglycan delta [Source:NCBI gene;Acc:416251]	13	12229467	12420212	protein_coding	-1	SGCD	SGCD
ENSGALG00000049428	-1.17119	0.792332	3.22827	0.0723769	0.713447	ENSGALG00000049428	ENSGALG00000049428.1			5	30926731	30934857	lncRNA	-1
ENSGALG00000001857	1.49509	3.56218	3.22804	0.0723871	0.713447	ENSGALG00000001857	ENSGALG00000001857.6	C1QTNF12	family with sequence similarity 132 member A [Source:NCBI gene;Acc:419422]	21	2480437	2496606	protein_coding	1	C1QTNF12	FAM132A
ENSGALG00000050875	0.991845	0.420462	3.22524	0.0725112	0.714091	ENSGALG00000050875	ENSGALG00000050875.1	ITGB7	integrin beta-7-like [Source:NCBI gene;Acc:107049666]	33	7212689	7217376	protein_coding	1	ITGB7	LOC107049666
ENSGALG00000004162	0.94673	1.1142	3.22117	0.0726917	0.715291	ENSGALG00000004162	ENSGALG00000004162.6	SLC16A6	solute carrier family 16 member 6 [Source:NCBI gene;Acc:417435]	18	7798240	7804327	protein_coding	-1	SLC16A6	SLC16A6
ENSGALG00000012281	0.478957	3.77931	3.21442	0.0729922	0.717668	ENSGALG00000012281	ENSGALG00000012281.5	PLA2G6	phospholipase A2 group VI [Source:NCBI gene;Acc:418028]	1	50979471	50998677	protein_coding	1		PLA2G6
ENSGALG00000034099	0.423296	5.12066	3.21079	0.0731542	0.718681	ENSGALG00000034099	ENSGALG00000034099.2	ATP6V1C1	ATPase H+ transporting V1 subunit C1 [Source:NCBI gene;Acc:420259]	2	129172101	129193565	protein_coding	1	ATP6V1C1	ATP6V1C1
ENSGALG00000028691	-0.586266	3.17979	3.2094	0.0732164	0.718683	ENSGALG00000028691	ENSGALG00000028691.4	MPG	N-methylpurine DNA glycosylase [Source:NCBI gene;Acc:416648]	14	12442148	12455061	protein_coding	1	MPG	MPG
ENSGALG00000010030	0.490067	4.13832	3.20815	0.0732724	0.718683	ENSGALG00000010030	ENSGALG00000010030.6			5	36184806	36199758	protein_coding	-1
ENSGALG00000053279	-0.663774	2.99153	3.20504	0.0734119	0.718899	ENSGALG00000053279	ENSGALG00000053279.1			3	65832266	65837554	protein_coding	-1
ENSGALG00000002069	0.5352	3.87206	3.20502	0.0734124	0.718899	ENSGALG00000002069	ENSGALG00000002069.6	FAM214B	family with sequence similarity 214 member B [Source:NCBI gene;Acc:100858763]	Z	8598884	8606934	protein_coding	-1	FAM214B	FAM214B
ENSGALG00000039587	-0.840356	1.95631	3.20145	0.073573	0.719892	ENSGALG00000039587	ENSGALG00000039587.3	SYNDIG1	synapse differentiation inducing 1 [Source:NCBI gene;Acc:416717]	3	15796600	15900738	protein_coding	1	SYNDIG1	SYNDIG1
ENSGALG00000028683	-0.570652	8.2926	3.19861	0.073701	0.720566	ENSGALG00000028683	ENSGALG00000028683.3	SSR3	signal sequence receptor subunit 3 [Source:NCBI gene;Acc:425027]	9	23034764	23038643	protein_coding	1		SSR3
ENSGALG00000006796	-0.762143	7.08195	3.19729	0.0737603	0.720568	ENSGALG00000006796	ENSGALG00000006796.6	SRPX2	sushi repeat containing protein, X-linked 2 [Source:NCBI gene;Acc:422261]	4	5171035	5178153	protein_coding	-1	SRPX2	SRPX2
ENSGALG00000051628	0.910483	0.720826	3.18498	0.074318	0.725435	ENSGALG00000051628	ENSGALG00000051628.1			25	2473278	2475688	protein_coding	-1
ENSGALG00000043435	1.13646	1.69288	3.18192	0.0744573	0.725639	ENSGALG00000043435	ENSGALG00000043435.2	CARNS1	carnosine synthase 1 [Source:NCBI gene;Acc:100359387]	5	205918	211190	protein_coding	1		CARNS1
ENSGALG00000002155	0.687409	3.13765	3.17962	0.0745622	0.725639	ENSGALG00000002155	ENSGALG00000002155.6	HS6ST1	heparan sulfate 6-O-sulfotransferase 1 [Source:NCBI gene;Acc:395141]	9	1733842	1899914	protein_coding	-1		HS6ST1
ENSGALG00000039206	0.601471	3.77548	3.17847	0.0746148	0.725639	ENSGALG00000039206	ENSGALG00000039206.2	ARID5A	AT rich interactive domain 5A (MRF1-like) [Source:NCBI gene;Acc:101749459]	22	3788778	3793564	protein_coding	-1	ARID5A	ARID5A
ENSGALG00000036956	0.604445	7.98013	3.17813	0.07463	0.725639	ENSGALG00000036956	ENSGALG00000036956.1			MT	1297	2272	Mt_rRNA	1
ENSGALG00000002783	0.635625	4.69139	3.17782	0.0746443	0.725639	ENSGALG00000002783	ENSGALG00000002783.6	SLC43A2	solute carrier family 43 member 2 [Source:NCBI gene;Acc:417557]	19	5454360	5480180	protein_coding	-1	SLC43A2	SLC43A2
ENSGALG00000014786	0.778959	1.53675	3.17668	0.0746963	0.725639	ENSGALG00000014786	ENSGALG00000014786.6	PIK3R1	phosphoinositide-3-kinase regulatory subunit 1 [Source:NCBI gene;Acc:427171]	Z	21600456	21657260	protein_coding	1	PIK3R1	PIK3R1
ENSGALG00000027768	0.417483	4.98025	3.17507	0.0747701	0.72565	ENSGALG00000027768	ENSGALG00000027768.4	CTDSP1	CTD small phosphatase 1 [Source:NCBI gene;Acc:100857754]	7	22542856	22545509	protein_coding	-1	CTDSP1	CTDSP1
ENSGALG00000012784	-0.54142	8.35969	3.17383	0.0748269	0.72565	ENSGALG00000012784	ENSGALG00000012784.6	TXNDC5	thioredoxin domain containing 5 [Source:NCBI gene;Acc:420867]	2	64356493	64377224	protein_coding	1		TXNDC5
ENSGALG00000036775	-0.53209	4.28535	3.17238	0.0748932	0.72565	ENSGALG00000036775	ENSGALG00000036775.2	SETBP1	SET binding protein 1 [Source:NCBI gene;Acc:416376]	Z	2630793	2878710	protein_coding	-1	SETBP1	SETBP1
ENSGALG00000036791	-0.428085	5.53273	3.17145	0.0749358	0.72565	ENSGALG00000036791	ENSGALG00000036791.2	COA5	cytochrome c oxidase assembly factor 5 [Source:NCBI gene;Acc:769722]	1	133608232	133610582	protein_coding	-1		COA5
ENSGALG00000027834	-0.466748	6.41075	3.16728	0.0751274	0.726175	ENSGALG00000027834	ENSGALG00000027834.3	ERGIC3	ERGIC and golgi 3 [Source:NCBI gene;Acc:419137]	20	1188438	1212751	protein_coding	-1	ERGIC3	ERGIC3
ENSGALG00000002203	0.775001	2.98974	3.16674	0.0751522	0.726175	ENSGALG00000002203	ENSGALG00000002203.6	FGF18	fibroblast growth factor 18 [Source:NCBI gene;Acc:395453]	13	3919090	4012490	protein_coding	-1		FGF18
ENSGALG00000009507	-0.832609	2.46686	3.16638	0.0751689	0.726175	ENSGALG00000009507	ENSGALG00000009507.6	PLEKHH1	pleckstrin homology, MyTH4 and FERM domain containing H1 [Source:NCBI gene;Acc:423270]	5	29011050	29062894	protein_coding	1	PLEKHH1	PLEKHH1
ENSGALG00000015306	0.528289	3.47233	3.16123	0.0754064	0.727768	ENSGALG00000015306	ENSGALG00000015306.3	OSTM1	osteopetrosis associated transmembrane protein 1 [Source:NCBI gene;Acc:421773]	3	67542264	67553225	protein_coding	1		OSTM1
ENSGALG00000054223	0.593598	3.3446	3.1597	0.0754771	0.727768	ENSGALG00000054223	ENSGALG00000054223.1			2	98750108	98758304	protein_coding	-1
ENSGALG00000029429	-0.829035	10.93	3.15646	0.0756272	0.727768	ENSGALG00000029429	ENSGALG00000029429.3	TGFBI	transforming growth factor beta induced [Source:NCBI gene;Acc:395897]	13	15872416	15893088	protein_coding	-1		TGFBI
ENSGALG00000003153	-0.482918	7.31326	3.15506	0.0756918	0.727768	ENSGALG00000003153	ENSGALG00000003153.5	COPE	coatomer protein complex subunit epsilon [Source:NCBI gene;Acc:420117]	28	3824581	3829413	protein_coding	1		COPE
ENSGALG00000040866	-0.542932	6.49346	3.15459	0.0757138	0.727768	ENSGALG00000040866	ENSGALG00000040866.2	P3H2	prolyl 3-hydroxylase 2 [Source:NCBI gene;Acc:414143]	9	14139404	14193800	protein_coding	1		P3H2
ENSGALG00000047909	-0.918147	1.04838	3.15382	0.0757495	0.727768	ENSGALG00000047909	ENSGALG00000047909.1			3	87015963	87022349	protein_coding	1
ENSGALG00000035903	-0.60493	7.93205	3.15377	0.0757519	0.727768	ENSGALG00000035903	ENSGALG00000035903.2	FAM46A	family with sequence similarity 46 member A [Source:NCBI gene;Acc:421845]	3	78460986	78465358	protein_coding	1		FAM46A
ENSGALG00000031843	0.948903	2.64813	3.15082	0.0758887	0.727951	ENSGALG00000031843	ENSGALG00000031843.2	ARHGAP18	Rho GTPase activating protein 18 [Source:NCBI gene;Acc:421706]	3	58109966	58167330	protein_coding	1	ARHGAP18	ARHGAP18
ENSGALG00000054583	-0.745044	2.37528	3.15018	0.0759186	0.727951	ENSGALG00000054583	ENSGALG00000054583.1	CDHR4	cadherin related family member 4 [Source:NCBI gene;Acc:101749086]	12	2841666	2846649	protein_coding	-1	CDHR4	CDHR4
ENSGALG00000017244	0.799621	5.37646	3.1495	0.0759502	0.727951	ENSGALG00000017244	ENSGALG00000017244.4	PRSS23	protease, serine 23 [Source:NCBI gene;Acc:419017]	1	190099704	190104302	protein_coding	-1	PRSS23	PRSS23
ENSGALG00000039611	-0.463641	5.26994	3.14519	0.0761511	0.728615	ENSGALG00000039611	ENSGALG00000039611.2		glucosidase, alpha; acid (Pompe disease, glycogen storage disease type II) [Source:NCBI gene;Acc:416462]	14	2988243	2996758	protein_coding	-1		GAAGSD
ENSGALG00000008123	-0.406002	4.87061	3.14516	0.0761526	0.728615	ENSGALG00000008123	ENSGALG00000008123.6	RINT1	RAD50 interactor 1 [Source:NCBI gene;Acc:427848]	1	14138452	14150312	protein_coding	1		RINT1
ENSGALG00000053682	0.990002	3.79095	3.1435	0.0762298	0.728615	ENSGALG00000053682	ENSGALG00000053682.1		MHC-like class I Y [Source:NCBI gene;Acc:768350]	16	1913575	1929106	protein_coding	-1		LOC768350
ENSGALG00000045021	0.846759	2.14112	3.14289	0.0762587	0.728615	ENSGALG00000045021	ENSGALG00000045021.2		GTPase IMAP family member 5-like [Source:NCBI gene;Acc:101751844]	2	431018	442278	protein_coding	-1		GIMAP5L
ENSGALG00000046098	0.719797	2.66289	3.14021	0.0763841	0.72924	ENSGALG00000046098	ENSGALG00000046098.2		ubiquitin-conjugating enzyme E2L 6 [Source:NCBI gene;Acc:100858073]	5	17257123	17258502	protein_coding	1		UBE2L6
ENSGALG00000001472	-0.457012	6.99171	3.13457	0.0766485	0.730837	ENSGALG00000001472	ENSGALG00000001472.5	JAM3	junctional adhesion molecule 3 [Source:NCBI gene;Acc:419736]	24	2520519	2547726	protein_coding	1	JAM3	JAM3
ENSGALG00000028484	-0.474094	6.35857	3.13302	0.0767214	0.730837	ENSGALG00000028484	ENSGALG00000028484.3	TMED7	transmembrane p24 trafficking protein 7 [Source:NCBI gene;Acc:769360]	Z	73196838	73203671	protein_coding	1		TMED7
ENSGALG00000052497	0.963661	1.87118	3.13281	0.0767313	0.730837	ENSGALG00000052497	ENSGALG00000052497.1		serine/threonine-protein kinase TAO2-like [Source:NCBI gene;Acc:107050692]	26	5518754	5539021	protein_coding	1		LOC107050692
ENSGALG00000011697	-0.420189	5.57465	3.13135	0.0768003	0.730923	ENSGALG00000011697	ENSGALG00000011697.7	SEC22A	SEC22 homolog A, vesicle trafficking protein [Source:NCBI gene;Acc:424250]	7	26927568	26942616	protein_coding	1		SEC22A
ENSGALG00000037521	0.530003	5.02597	3.12734	0.0769894	0.731906	ENSGALG00000037521	ENSGALG00000037521.2	PRCP	prolylcarboxypeptidase [Source:NCBI gene;Acc:428096]	1	190297679	190326959	protein_coding	-1	PRCP	PRCP
ENSGALG00000043336	-0.479344	6.69416	3.12661	0.0770238	0.731906	ENSGALG00000043336	ENSGALG00000043336.2	COPZ1	coatomer protein complex subunit zeta 1 [Source:NCBI gene;Acc:107055416]	33	7735364	7740331	protein_coding	1	COPZ1	COPZ1
ENSGALG00000005265	-0.93406	1.96797	3.11523	0.0775636	0.735742	ENSGALG00000005265	ENSGALG00000005265.6	SYT9	synaptotagmin IX [Source:NCBI gene;Acc:423026]	5	7436058	7495397	protein_coding	1	SYT9	SYT9
ENSGALG00000030687	-1.10214	2.37785	3.11259	0.0776893	0.735742	ENSGALG00000030687	ENSGALG00000030687.2	LGI3	leucine rich repeat LGI family member 3 [Source:NCBI gene;Acc:107049625]	22	62899	68531	protein_coding	1	LGI3	LGI3
ENSGALG00000005357	-0.524225	8.33681	3.11207	0.077714	0.735742	ENSGALG00000005357	ENSGALG00000005357.7	COPB2	coatomer protein complex subunit beta 2 [Source:NCBI gene;Acc:424823]	9	6039052	6053320	protein_coding	-1	COPB2	COPB2
ENSGALG00000038575	0.754169	0.654036	3.11028	0.0777994	0.735742	ENSGALG00000038575	ENSGALG00000038575.3			18	9216876	9219065	lncRNA	1
ENSGALG00000011593	-0.543858	3.52853	3.1097	0.0778271	0.735742	ENSGALG00000011593	ENSGALG00000011593.6	TMEM177	transmembrane protein 177 [Source:NCBI gene;Acc:424232]	7	25292679	25297091	protein_coding	1	TMEM177	TMEM177
ENSGALG00000042030	1.30738	6.06434	3.10958	0.0778332	0.735742	ENSGALG00000042030	ENSGALG00000042030.2	P4HA3	prolyl 4-hydroxylase subunit alpha 3 [Source:NCBI gene;Acc:419057]	1	196016274	196022241	protein_coding	1	P4HA3	P4HA3
ENSGALG00000029837	-0.530999	6.97833	3.10868	0.0778761	0.735742	ENSGALG00000029837	ENSGALG00000029837.2	OST4	oligosaccharyltransferase complex subunit 4, non-catalytic [Source:NCBI gene;Acc:100526758]	3	104460533	104460646	protein_coding	-1		OST4
ENSGALG00000036021	-0.719927	1.77451	3.10796	0.0779106	0.735742	ENSGALG00000036021	ENSGALG00000036021.2	MTMR7	myotubularin related protein 7 [Source:NCBI gene;Acc:422731]	4	63086800	63130477	protein_coding	1	MTMR7	MTMR7
ENSGALG00000016898	-0.41313	4.88254	3.10404	0.0780983	0.736943	ENSGALG00000016898	ENSGALG00000016898.6	TGDS	TDP-glucose 4,6-dehydratase [Source:NCBI gene;Acc:418793]	1	147878338	147891031	protein_coding	1	TGDS	TGDS
ENSGALG00000045218	0.77528	0.266913	3.09972	0.0783056	0.737682	ENSGALG00000045218	ENSGALG00000045218.2	MYO18B	myosin XVIIIB [Source:NCBI gene;Acc:416905]	15	7338309	7382993	protein_coding	1	MYO18B	MYO18B
ENSGALG00000045529	-0.525273	3.78175	3.09778	0.0783991	0.737682	ENSGALG00000045529	ENSGALG00000045529.2	RAB15	RAB15, member RAS oncogene family [Source:NCBI gene;Acc:429955]	5	567699	570024	protein_coding	1	RAB15	RAB15
ENSGALG00000015233	0.804523	4.43137	3.09702	0.0784356	0.737682	ENSGALG00000015233	ENSGALG00000015233.7	ATP1B1	ATPase Na+/K+ transporting subunit beta 1 [Source:NCBI gene;Acc:396529]	1	84899572	84913575	protein_coding	-1		ATP1B1
ENSGALG00000003295	0.741025	3.81134	3.09629	0.078471	0.737682	ENSGALG00000003295	ENSGALG00000003295.6	ADAMTS12	ADAM metallopeptidase with thrombospondin type 1 motif 12 [Source:NCBI gene;Acc:427428]	Z	10140727	10313424	protein_coding	-1	ADAMTS12	ADAMTS12
ENSGALG00000009303	0.477475	4.47364	3.09508	0.0785294	0.737682	ENSGALG00000009303	ENSGALG00000009303.7	ENAH	enabled homolog (Drosophila) [Source:NCBI gene;Acc:374180]	3	17438558	17480222	protein_coding	1		ENAH
ENSGALG00000026302	-0.500041	6.83139	3.09227	0.0786648	0.737682	ENSGALG00000026302	ENSGALG00000026302.2	SRPRB	SRP receptor beta subunit [Source:NCBI gene;Acc:101750392]	9	4758467	4765591	protein_coding	-1		SRPRB
ENSGALG00000032882	0.566304	3.52815	3.0914	0.078707	0.737682	ENSGALG00000032882	ENSGALG00000032882.2	EVA1C	eva-1 homolog C [Source:NCBI gene;Acc:418496]	1	106296563	106332939	protein_coding	1	EVA1C	EVA1C
ENSGALG00000001788	-0.499262	6.91025	3.0907	0.078741	0.737682	ENSGALG00000001788	ENSGALG00000001788.7	ADPGK	ADP dependent glucokinase [Source:NCBI gene;Acc:415317]	10	2179000	2190828	protein_coding	-1		ADPGK
ENSGALG00000042614	-0.456685	5.98083	3.0903	0.0787603	0.737682	ENSGALG00000042614	ENSGALG00000042614.2	NBAS	neuroblastoma amplified sequence [Source:NCBI gene;Acc:421947]	3	98774986	98935374	protein_coding	-1	NBAS	NBAS
ENSGALG00000013980	-0.71426	3.82077	3.08985	0.0787822	0.737682	ENSGALG00000013980	ENSGALG00000013980.6	SLC2A12	solute carrier family 2 member 12 [Source:NCBI gene;Acc:421696]	3	56302892	56331660	protein_coding	1	SLC2A12	SLC2A12
ENSGALG00000038209	1.1006	0.274545	3.08806	0.0788687	0.737925	ENSGALG00000038209	ENSGALG00000038209.2	TRIM39.1	tripartite motif containing 39.1 [Source:NCBI gene;Acc:101747534]	16	2510124	2514505	protein_coding	-1		TRIM39.1
ENSGALG00000006880	-0.51432	6.7568	3.08153	0.0791859	0.739726	ENSGALG00000006880	ENSGALG00000006880.6	SLC38A10	solute carrier family 38 member 10 [Source:NCBI gene;Acc:422070]	18	9223491	9252720	protein_coding	1	SLC38A10	SLC38A10
ENSGALG00000040002	0.866797	2.63733	3.08135	0.0791949	0.739726	ENSGALG00000040002	ENSGALG00000040002.3		CD244 molecule [Source:NCBI gene;Acc:425935]	25	2471754	2479000	protein_coding	-1		CD244
ENSGALG00000004420	0.697606	3.02749	3.07899	0.0793097	0.739726	ENSGALG00000004420	ENSGALG00000004420.7	SDK1	sidekick cell adhesion molecule 1 [Source:NCBI gene;Acc:373894]	14	3925849	4284907	protein_coding	1		SDK1
ENSGALG00000010837	-0.442251	4.87329	3.07868	0.0793248	0.739726	ENSGALG00000010837	ENSGALG00000010837.7	ASB5	ankyrin repeat and SOCS box containing 5 [Source:NCBI gene;Acc:422572]	4	44357317	44391275	protein_coding	-1	ASB5	ASB5
ENSGALG00000009063	0.690728	1.975	3.07512	0.0794988	0.739726	ENSGALG00000009063	ENSGALG00000009063.6		PAS domain containing 1 [Source:NCBI gene;Acc:422384]	4	17406321	17430410	protein_coding	-1		PASD1
ENSGALG00000030614	-0.770028	1.19216	3.07508	0.0795005	0.739726	ENSGALG00000030614	ENSGALG00000030614.2	ADH1C	alcohol dehydrogenase 1C (class I), gamma polypeptide [Source:NCBI gene;Acc:771920]	4	59984686	59995027	protein_coding	-1		ADH1C
ENSGALG00000004498	-0.448276	4.75689	3.07474	0.0795172	0.739726	ENSGALG00000004498	ENSGALG00000004498.6	SLC2A10	solute carrier family 2 member 10 [Source:NCBI gene;Acc:419206]	20	5583217	5590855	protein_coding	1	SLC2A10	SLC2A10
ENSGALG00000038299	-0.417153	5.56982	3.07413	0.0795469	0.739726	ENSGALG00000038299	ENSGALG00000038299.3	NUDCD3	NudC domain containing 3 [Source:NCBI gene;Acc:770002]	22	5212638	5230538	protein_coding	1	NUDCD3	NUDCD3
ENSGALG00000041792	0.44526	6.55785	3.07192	0.0796555	0.74017	ENSGALG00000041792	ENSGALG00000041792.3	C26H6orf106	chromosome 26 C6orf106 homolog [Source:NCBI gene;Acc:419902]	26	4311807	4343652	protein_coding	1		C26H6orf106
ENSGALG00000005460	0.783309	1.59153	3.06686	0.0799037	0.741051	ENSGALG00000005460	ENSGALG00000005460.7	SLCO4A1	solute carrier organic anion transporter family member 4A1 [Source:NCBI gene;Acc:419231]	20	8179858	8205178	protein_coding	1		SLCO4A1
ENSGALG00000046326	1.20586	0.943523	3.06625	0.0799335	0.741051	ENSGALG00000046326	ENSGALG00000046326.2	IL1R2	interleukin 1 receptor type 2 [Source:NCBI gene;Acc:418715]	1	135054624	135066732	protein_coding	1	IL1R2	IL1R2
ENSGALG00000032410	0.599939	3.33598	3.06397	0.0800458	0.741051	ENSGALG00000032410	ENSGALG00000032410.3	CBFA2T3	CBFA2/RUNX1 translocation partner 3 [Source:NCBI gene;Acc:415846]	11	18525292	18544326	protein_coding	-1		CBFA2T3
ENSGALG00000036327	-0.766925	7.22131	3.0639	0.0800496	0.741051	ENSGALG00000036327	ENSGALG00000036327.3	NGEF	neuronal guanine nucleotide exchange factor [Source:NCBI gene;Acc:424744]	9	1232430	1255560	protein_coding	-1		NGEF
ENSGALG00000001797	-0.529021	6.49932	3.0638	0.0800545	0.741051	ENSGALG00000001797	ENSGALG00000001797.6	GPSM1	G-protein signaling modulator 1 [Source:NCBI gene;Acc:417132]	17	8222353	8272562	protein_coding	-1	GPSM1	GPSM1
ENSGALG00000008208	-0.58777	8.64204	3.05899	0.0802914	0.742472	ENSGALG00000008208	ENSGALG00000008208.6	CASC4	cancer susceptibility candidate 4 [Source:NCBI gene;Acc:415575]	10	20257007	20277757	protein_coding	-1		CASC4
ENSGALG00000000630	-0.819695	0.610557	3.05794	0.0803435	0.742472	ENSGALG00000000630	ENSGALG00000000630.5	HAS3	hyaluronan synthase 3 [Source:NCBI gene;Acc:427564]	11	18909088	18913330	protein_coding	1	HAS3	HAS3
ENSGALG00000005966	-0.559515	7.82453	3.05698	0.0803908	0.742472	ENSGALG00000005966	ENSGALG00000005966.6	SEC61A1	Sec61 translocon alpha 1 subunit [Source:NCBI gene;Acc:416023]	12	9936983	9947735	protein_coding	-1	SEC61A1	SEC61A1
ENSGALG00000050656	-0.589448	2.76677	3.05552	0.0804633	0.742579	ENSGALG00000050656	ENSGALG00000050656.1			32	721205	723648	protein_coding	-1
ENSGALG00000025977	-0.512994	5.77598	3.05285	0.0805958	0.743219	ENSGALG00000025977	ENSGALG00000025977.3	GADD45A	growth arrest and DNA damage inducible alpha [Source:NCBI gene;Acc:693255]	8	29041359	29042869	protein_coding	1		GADD45A
ENSGALG00000006887	1.03939	0.86728	3.0508	0.0806975	0.743219	ENSGALG00000006887	ENSGALG00000006887.6	FAM174B	family with sequence similarity 174 member B [Source:HGNC Symbol;Acc:HGNC:34339]	10	14995725	15004493	protein_coding	-1	FAM174B
ENSGALG00000047395	1.26359	1.835	3.05043	0.0807157	0.743219	ENSGALG00000047395	ENSGALG00000047395.1			15	8217930	8218211	IG_V_gene	-1
ENSGALG00000005672	1.03438	1.25172	3.04875	0.0807992	0.743426	ENSGALG00000005672	ENSGALG00000005672.6	SLC6A7	solute carrier family 6 member 7 [Source:NCBI gene;Acc:416277]	13	13923362	13933620	protein_coding	-1	SLC6A7	SLC6A7
ENSGALG00000033178	0.448491	6.07025	3.04427	0.0810225	0.744257	ENSGALG00000033178	ENSGALG00000033178.3	KLF6	Kruppel like factor 6 [Source:NCBI gene;Acc:420463]	2	11821968	11830930	protein_coding	-1		KLF6
ENSGALG00000017049	-0.395581	4.81909	3.04137	0.0811674	0.744257	ENSGALG00000017049	ENSGALG00000017049.7	ALG5	ALG5, dolichyl-phosphate beta-glucosyltransferase [Source:NCBI gene;Acc:418898]	1	173700751	173720152	protein_coding	1	ALG5	ALG5
ENSGALG00000026395	-0.662713	3.72854	3.03905	0.0812834	0.744257	ENSGALG00000026395	ENSGALG00000026395.3	TRABD2A	TraB domain containing 2A [Source:NCBI gene;Acc:427288]	Z	52981307	53065796	protein_coding	-1	TRABD2A	TRABD2A
ENSGALG00000013218	0.855297	3.3261	3.03852	0.08131	0.744257	ENSGALG00000013218	ENSGALG00000013218.5	C3AR1	complement C3a receptor 1 [Source:NCBI gene;Acc:418198]	1	66793430	66796768	protein_coding	1		C3AR1
ENSGALG00000032061	-0.465722	6.03215	3.03832	0.08132	0.744257	ENSGALG00000032061	ENSGALG00000032061.2	IER3IP1	immediate early response 3 interacting protein 1 [Source:NCBI gene;Acc:101749130]	Z	1753936	1756904	protein_coding	1		IER3IP1
ENSGALG00000036497	0.545835	3.60485	3.03718	0.0813773	0.744257	ENSGALG00000036497	ENSGALG00000036497.3	SOX4	SRY-box 4 [Source:NCBI gene;Acc:395143]	2	58890036	58891801	protein_coding	-1		SOX4
ENSGALG00000011663	-0.75463	10.1842	3.03682	0.0813951	0.744257	ENSGALG00000011663	ENSGALG00000011663.6	FNDC1	fibronectin type III domain containing 1 [Source:NCBI gene;Acc:421589]	3	45891575	45929214	protein_coding	-1	FNDC1	FNDC1
ENSGALG00000015669	0.877435	0.941472	3.03571	0.0814511	0.744257	ENSGALG00000015669	ENSGALG00000015669.6	PTBP3	polypyrimidine tract binding protein 3 [Source:NCBI gene;Acc:427333]	Z	66269978	66319837	protein_coding	1	PTBP3	PTBP3
ENSGALG00000015970	-0.93615	14.3142	3.03436	0.0815185	0.744257	ENSGALG00000015970	ENSGALG00000015970.6	COL9A1	collagen type IX alpha 1 chain [Source:NCBI gene;Acc:771873]	3	82821169	82887349	protein_coding	1		COL9A1
ENSGALG00000032413	0.444737	5.50827	3.0339	0.0815416	0.744257	ENSGALG00000032413	ENSGALG00000032413.3	NADK	NAD kinase [Source:NCBI gene;Acc:419403]	21	1976366	1999141	protein_coding	1		NADK
ENSGALG00000048206	0.898717	1.45278	3.03253	0.0816108	0.744257	ENSGALG00000048206	ENSGALG00000048206.1			3	104035153	104039994	lncRNA	1
ENSGALG00000021355	0.778794	1.76514	3.03229	0.0816227	0.744257	ENSGALG00000021355	ENSGALG00000021355.5		receptor-type tyrosine-protein phosphatase S-like [Source:NCBI gene;Acc:100858919]	Z	9015759	9024777	protein_coding	1		LOC100858919
ENSGALG00000040275	0.552681	3.79268	3.03063	0.0817065	0.744463	ENSGALG00000040275	ENSGALG00000040275.2	RCSD1	RCSD domain containing 1 [Source:NCBI gene;Acc:418443]	1	92961990	92997116	protein_coding	-1		RCSD1
ENSGALG00000021135	0.698286	2.34259	3.02589	0.0819452	0.744463	ENSGALG00000021135	ENSGALG00000021135.5	HAPLN3	hyaluronan and proteoglycan link protein 3 [Source:NCBI gene;Acc:415495]	10	13483840	13488077	protein_coding	1	HAPLN3	HAPLN3
ENSGALG00000024379	0.554814	4.94006	3.02566	0.0819569	0.744463	ENSGALG00000024379	ENSGALG00000024379.4		endothelial cell surface expressed chemotaxis and apoptosis regulator [Source:NCBI gene;Acc:416190]	13	3147680	3166499	protein_coding	1		ECSCR
ENSGALG00000033887	0.49032	3.86703	3.02508	0.0819863	0.744463	ENSGALG00000033887	ENSGALG00000033887.2	IL17RA	interleukin 17 receptor A [Source:NCBI gene;Acc:418158]	1	61607575	61627406	protein_coding	1		IL17RA
ENSGALG00000045499	-0.642489	2.91567	3.02451	0.0820149	0.744463	ENSGALG00000045499	ENSGALG00000045499.2	TCFL5	transcription factor like 5 [Source:NCBI gene;Acc:771446]	20	8373898	8379153	protein_coding	-1	TCFL5	TCFL5
ENSGALG00000015407	0.809892	1.94611	3.02425	0.082028	0.744463	ENSGALG00000015407	ENSGALG00000015407.6	PLAG1	PLAG1 zinc finger [Source:NCBI gene;Acc:429484]	2	111237295	111284428	protein_coding	-1		PLAG1
ENSGALG00000016463	0.552318	3.95407	3.02249	0.0821172	0.744463	ENSGALG00000016463	ENSGALG00000016463.7	FAM49A	family with sequence similarity 49 member A [Source:NCBI gene;Acc:421949]	3	99567584	99621073	protein_coding	-1		FAM49A
ENSGALG00000036566	-0.512249	6.77736	3.02096	0.0821948	0.744463	ENSGALG00000036566	ENSGALG00000036566.2		Rho GTPase activating protein 20-like [Source:NCBI gene;Acc:422171]	4	200826	216542	protein_coding	-1		LOC422171
ENSGALG00000039872	-0.538816	6.10609	3.02055	0.0822157	0.744463	ENSGALG00000039872	ENSGALG00000039872.2	PDLIM4	PDZ and LIM domain 4 [Source:NCBI gene;Acc:395643]	13	17488920	17519533	protein_coding	1		PDLIM4
ENSGALG00000014509	-0.488048	5.67511	3.01975	0.0822564	0.744463	ENSGALG00000014509	ENSGALG00000014509.6	BST1	bone marrow stromal cell antigen 1 [Source:NCBI gene;Acc:422828]	4	76637942	76652266	protein_coding	-1		BST1
ENSGALG00000044339	0.880762	0.997122	3.01737	0.082377	0.745001	ENSGALG00000044339	ENSGALG00000044339.2		junction adhesion molecule like [Source:NCBI gene;Acc:419777]	24	5459531	5465244	lncRNA	-1		JAML
ENSGALG00000023379	0.887334	1.55272	3.01207	0.0826469	0.746576	ENSGALG00000023379	ENSGALG00000023379.4	F2RL2	coagulation factor II thrombin receptor like 2 [Source:NCBI gene;Acc:768449]	Z	23491652	23495738	protein_coding	1	F2RL2	F2RL2
ENSGALG00000010526	-0.510248	7.50933	3.01154	0.0826737	0.746576	ENSGALG00000010526	ENSGALG00000010526.6	OSTC	oligosaccharyltransferase complex non-catalytic subunit [Source:NCBI gene;Acc:422525]	4	37701947	37707117	protein_coding	-1		OSTC
ENSGALG00000046819	-0.831355	3.56755	3.00896	0.0828055	0.747109	ENSGALG00000046819	ENSGALG00000046819.1			2	98023751	98033989	lncRNA	-1
ENSGALG00000003815	-0.540431	7.97738	3.00784	0.0828629	0.747109	ENSGALG00000003815	ENSGALG00000003815.7	RPN2	ribophorin II [Source:NCBI gene;Acc:419177]	20	5019515	5049331	protein_coding	1		RPN2
ENSGALG00000032385	0.843482	1.52421	3.00678	0.0829168	0.747109	ENSGALG00000032385	ENSGALG00000032385.2	PFKFB4	6-phosphofructo-2-kinase/fructose-2,6-biphosphatase 4 [Source:NCBI gene;Acc:415906]	KZ626836.1	263831	268323	protein_coding	-1		PFKFB4
ENSGALG00000007645	0.761932	2.26662	3.0025	0.0831363	0.748534	ENSGALG00000007645	ENSGALG00000007645.5		prominin 1-like [Source:NCBI gene;Acc:423849]	6	23492176	23498630	protein_coding	1		PROM1L
ENSGALG00000031729	0.437268	4.49491	2.99969	0.0832802	0.749276	ENSGALG00000031729	ENSGALG00000031729.2	MOB3A	MOB kinase activator 3A [Source:NCBI gene;Acc:100857182]	28	2214360	2217990	protein_coding	1	MOB3A	MOB3A
ENSGALG00000047464	0.947072	0.605299	2.99544	0.0834992	0.750692	ENSGALG00000047464	ENSGALG00000047464.1	FBXL22	F-box and leucine rich repeat protein 22 [Source:HGNC Symbol;Acc:HGNC:27537]	10	4481781	4486512	protein_coding	-1	FBXL22
ENSGALG00000013098	0.503202	5.16468	2.99213	0.08367	0.751673	ENSGALG00000013098	ENSGALG00000013098.6	MGST1	microsomal glutathione S-transferase 1 [Source:NCBI gene;Acc:418178]	1	63277443	63284355	protein_coding	1		MGST1
ENSGALG00000031700	-0.577377	5.27685	2.98862	0.0838514	0.752297	ENSGALG00000031700	ENSGALG00000031700.2	TRPS1	transcriptional repressor GATA binding 1 [Source:NCBI gene;Acc:420289]	2	134839746	135006696	protein_coding	-1	TRPS1	TRPS1
ENSGALG00000033226	0.534962	3.7529	2.9884	0.083863	0.752297	ENSGALG00000033226	ENSGALG00000033226.2	FAM107B	family with sequence similarity 107 member B [Source:NCBI gene;Acc:426376]	1	7825021	7888297	protein_coding	-1	FAM107B	FAM107B
ENSGALG00000037467	-0.901481	2.34936	2.98694	0.0839384	0.752419	ENSGALG00000037467	ENSGALG00000037467.2	NEU2	neuraminidase 2 [Source:NCBI gene;Acc:107049056]	9	1255143	1289866	protein_coding	1	NEU2	NEU2
ENSGALG00000031786	0.943531	2.36839	2.98205	0.0841925	0.75378	ENSGALG00000031786	ENSGALG00000031786.2	BLVRA	biliverdin reductase A [Source:NCBI gene;Acc:420776]	2	51589935	51620997	protein_coding	1	BLVRA	BLVRA
ENSGALG00000041086	-0.403181	4.32963	2.98164	0.084214	0.75378	ENSGALG00000041086	ENSGALG00000041086.3	MRPL15	mitochondrial ribosomal protein L15 [Source:NCBI gene;Acc:421121]	2	110380891	110389410	protein_coding	1		MRPL15
ENSGALG00000048588	-0.482564	4.62642	2.97684	0.084464	0.755463	ENSGALG00000048588	ENSGALG00000048588.1			9	15405378	15415404	lncRNA	1
ENSGALG00000014673	0.814951	3.63839	2.97479	0.0845709	0.755595	ENSGALG00000014673	ENSGALG00000014673.6	RFESD	Rieske Fe-S domain containing [Source:NCBI gene;Acc:427118]	Z	57610727	57613816	protein_coding	-1	RFESD	RFESD
ENSGALG00000051518	0.865286	1.8474	2.97285	0.0846725	0.755595	ENSGALG00000051518	ENSGALG00000051518.1			1	72018925	72021435	lncRNA	-1
ENSGALG00000030677	0.478855	5.01442	2.9719	0.0847225	0.755595	ENSGALG00000030677	ENSGALG00000030677.3	ABCG2	ATP binding cassette subfamily G member 2 (Junior blood group) [Source:NCBI gene;Acc:423767]	6	18374424	18392107	protein_coding	1		ABCG2
ENSGALG00000004948	0.553728	3.2775	2.97067	0.0847865	0.755595	ENSGALG00000004948	ENSGALG00000004948.6	GLA	galactosidase alpha [Source:NCBI gene;Acc:422188]	4	2019981	2025100	protein_coding	1	GLA	GLA
ENSGALG00000042538	0.780332	2.08535	2.97063	0.084789	0.755595	ENSGALG00000042538	ENSGALG00000042538.2	BAIAP2	BAI1 associated protein 2 [Source:NCBI gene;Acc:422077]	18	9298043	9330926	protein_coding	-1	BAIAP2	BAIAP2
ENSGALG00000001872	-0.503159	7.67824	2.96897	0.0848758	0.755816	ENSGALG00000001872	ENSGALG00000001872.4	SDF4	stromal cell derived factor 4 [Source:NCBI gene;Acc:419423]	21	2535880	2548699	protein_coding	1		SDF4
ENSGALG00000001774	-0.532754	6.25693	2.96414	0.0851295	0.757522	ENSGALG00000001774	ENSGALG00000001774.6	NEO1	neogenin 1 [Source:NCBI gene;Acc:395822]	10	2272014	2467955	protein_coding	1	NEO1	NEO1
ENSGALG00000029743	-0.397829	5.16026	2.9618	0.0852531	0.758068	ENSGALG00000029743	ENSGALG00000029743.3	MED6	mediator complex subunit 6 [Source:NCBI gene;Acc:426282]	5	27647878	27656405	protein_coding	1		MED6
ENSGALG00000039990	-0.763995	9.86229	2.95951	0.0853737	0.758404	ENSGALG00000039990	ENSGALG00000039990.2	TNC	tenascin C [Source:NCBI gene;Acc:396440]	17	3013995	3098173	protein_coding	-1		TNC
ENSGALG00000007404	-0.467746	7.13781	2.95872	0.0854154	0.758404	ENSGALG00000007404	ENSGALG00000007404.6	YIPF5	Yip1 domain family member 5 [Source:NCBI gene;Acc:416344]	13	18256584	18263765	protein_coding	-1		YIPF5
ENSGALG00000034973	0.48664	5.15893	2.95503	0.0856108	0.759115	ENSGALG00000034973	ENSGALG00000034973.2	FZD7	frizzled class receptor 7 [Source:NCBI gene;Acc:374060]	7	11682384	11685456	protein_coding	1		FZD7
ENSGALG00000038141	0.888577	1.85654	2.95485	0.0856201	0.759115	ENSGALG00000038141	ENSGALG00000038141.2	NCF4	neutrophil cytosolic factor 4 [Source:NCBI gene;Acc:418052]	1	51574103	51584520	protein_coding	-1		NCF4
ENSGALG00000042067	0.66761	2.45464	2.9509	0.0858297	0.759151	ENSGALG00000042067	ENSGALG00000042067.2	SPRY1	sprouty RTK signaling antagonist 1 [Source:NCBI gene;Acc:395583]	4	53357901	53358866	protein_coding	-1		SPRY1
ENSGALG00000037901	-0.581919	8.82915	2.95067	0.0858422	0.759151	ENSGALG00000037901	ENSGALG00000037901.3	EFEMP1	EGF containing fibulin like extracellular matrix protein 1 [Source:NCBI gene;Acc:428543]	3	269054	321343	protein_coding	-1	EFEMP1	EFEMP1
ENSGALG00000009650	-0.426958	5.43056	2.95013	0.0858705	0.759151	ENSGALG00000009650	ENSGALG00000009650.6		palladin, cytoskeletal associated protein [Source:NCBI gene;Acc:422428]	4	25017886	25199203	pseudogene	1		PALLD
ENSGALG00000001270	-0.431583	5.39044	2.95008	0.0858734	0.759151	ENSGALG00000001270	ENSGALG00000001270.6	PRKCZ	protein kinase C zeta [Source:NCBI gene;Acc:419399]	21	1802100	1841490	protein_coding	-1	PRKCZ	PRKCZ
ENSGALG00000017135	-0.43799	6.13407	2.93999	0.0864112	0.761661	ENSGALG00000017135	ENSGALG00000017135.7	CRYL1	crystallin lambda 1 [Source:NCBI gene;Acc:418953]	1	180188436	180238997	protein_coding	1		CRYL1
ENSGALG00000011079	0.456645	4.77955	2.93874	0.0864784	0.761661	ENSGALG00000011079	ENSGALG00000011079.4	GLRX5	glutaredoxin 5 [Source:NCBI gene;Acc:423440]	5	46259416	46265888	protein_coding	1		GLRX5
ENSGALG00000003709	0.566147	4.65851	2.93873	0.0864785	0.761661	ENSGALG00000003709	ENSGALG00000003709.6	PLAT	plasminogen activator, tissue [Source:NCBI gene;Acc:426791]	22	3021586	3034748	protein_coding	-1	PLAT	PLAT
ENSGALG00000041114	-0.438996	6.06016	2.93828	0.0865026	0.761661	ENSGALG00000041114	ENSGALG00000041114.2	GOLGA4	golgin A4 [Source:NCBI gene;Acc:420758]	2	48887179	48948151	protein_coding	-1	GOLGA4	GOLGA4
ENSGALG00000053296	0.803553	1.46251	2.93683	0.0865808	0.761661	ENSGALG00000053296	ENSGALG00000053296.1		chromosome 3 open reading frame, human C8orf80 [Source:NCBI gene;Acc:422000]	3	105068315	105078451	protein_coding	1		C3H8ORF80
ENSGALG00000043021	0.692721	2.12883	2.93615	0.0866172	0.761661	ENSGALG00000043021	ENSGALG00000043021.3	HORMAD1	golgi phosphoprotein 3 like [Source:NCBI gene;Acc:425072]	25	3671693	3678692	protein_coding	1	HORMAD1	GOLPH3L
ENSGALG00000043641	0.585709	6.14591	2.93496	0.0866806	0.761661	ENSGALG00000043641	ENSGALG00000043641.2	JUND	JunD proto-oncogene, AP-1 transcription factor subunit [Source:NCBI gene;Acc:107055370]	28	4077792	4078763	protein_coding	1	JUND	JUND
ENSGALG00000033561	-0.809104	1.43263	2.93484	0.086687	0.761661	ENSGALG00000033561	ENSGALG00000033561.2	DGKB	diacylglycerol kinase beta [Source:NCBI gene;Acc:772367]	2	27388794	27720368	protein_coding	-1	DGKB	DGKB
ENSGALG00000027132	0.516123	3.99324	2.93423	0.0867201	0.761661	ENSGALG00000027132	ENSGALG00000027132.3			28	4394336	4410108	protein_coding	1
ENSGALG00000010302	-0.391577	4.74285	2.93258	0.0868089	0.761892	ENSGALG00000010302	ENSGALG00000010302.7		solute carrier family 33 member 1 [Source:NCBI gene;Acc:425029]	9	23104838	23115100	protein_coding	1		SLC33A1
ENSGALG00000014391	-0.524649	3.9616	2.93107	0.0868899	0.762054	ENSGALG00000014391	ENSGALG00000014391.7	CCDC149	coiled-coil domain containing 149 [Source:NCBI gene;Acc:100858889]	4	73611512	73661940	protein_coding	1	CCDC149	CCDC149
ENSGALG00000006207	-0.509721	7.77528	2.92773	0.0870696	0.762525	ENSGALG00000006207	ENSGALG00000006207.6	HM13	histocompatibility minor 13 [Source:NCBI gene;Acc:100859573]	20	9989963	10003069	protein_coding	1	HM13	HM13
ENSGALG00000010055	-0.594308	4.81502	2.92699	0.0871098	0.762525	ENSGALG00000010055	ENSGALG00000010055.6	DAAM2	dishevelled associated activator of morphogenesis 2 [Source:NCBI gene;Acc:421422]	3	28856440	29039975	protein_coding	-1	DAAM2	DAAM2
ENSGALG00000038775	-0.858894	4.48441	2.92659	0.0871314	0.762525	ENSGALG00000038775	ENSGALG00000038775.2	SPON1	spondin 1 [Source:NCBI gene;Acc:395657]	5	6640438	6815435	protein_coding	-1		SPON1
ENSGALG00000016755	-0.728066	2.0421	2.92445	0.0872468	0.762585	ENSGALG00000016755	ENSGALG00000016755.7			1	133708781	133728300	protein_coding	-1
ENSGALG00000002790	-0.571284	4.56739	2.92414	0.0872634	0.762585	ENSGALG00000002790	ENSGALG00000002790.6	ABLIM3	actin binding LIM protein family member 3 [Source:NCBI gene;Acc:416201]	13	9263565	9297986	protein_coding	-1	ABLIM3	ABLIM3
ENSGALG00000043662	-0.586523	5.21438	2.92244	0.0873556	0.762597	ENSGALG00000043662	ENSGALG00000043662.2	NDRG4	NDRG family member 4 [Source:NCBI gene;Acc:768618]	11	352125	367971	protein_coding	-1	NDRG4	NDRG4
ENSGALG00000013834	0.50093	3.94545	2.91978	0.0874997	0.762597	ENSGALG00000013834	ENSGALG00000013834.6	CCDC28A	coiled-coil domain containing 28A [Source:NCBI gene;Acc:421679]	3	54273073	54278672	protein_coding	-1	CCDC28A	CCDC28A
ENSGALG00000014163	-0.908223	2.32926	2.9197	0.0875044	0.762597	ENSGALG00000014163	ENSGALG00000014163.6	TTLL1	tubulin tyrosine ligase like 1 [Source:NCBI gene;Acc:418225]	1	68477408	68498513	protein_coding	-1	TTLL1	TTLL1
ENSGALG00000016345	-0.421872	4.6252	2.91916	0.0875336	0.762597	ENSGALG00000016345	ENSGALG00000016345.6	APOO	apolipoprotein O [Source:NCBI gene;Acc:418599]	1	119704493	119736164	protein_coding	1	APOO	APOO
ENSGALG00000036738	0.668471	4.61344	2.91798	0.0875977	0.762597	ENSGALG00000036738	ENSGALG00000036738.2	IGSF3	immunoglobulin superfamily member 3 [Source:NCBI gene;Acc:418451]	1	93596025	93648691	protein_coding	1	IGSF3	IGSF3
ENSGALG00000006963	0.572422	3.89199	2.91719	0.0876404	0.762597	ENSGALG00000006963	ENSGALG00000006963.6	ENDOV	endonuclease V [Source:NCBI gene;Acc:422079]	18	9480639	9489310	protein_coding	-1	ENDOV	ENDOV
ENSGALG00000016537	-0.646258	2.11113	2.91545	0.0877351	0.762876	ENSGALG00000016537	ENSGALG00000016537.6	SCML2	sex comb on midleg-like 2 (Drosophila) [Source:NCBI gene;Acc:418613]	1	122078244	122134183	protein_coding	1	SCML2	SCML2
ENSGALG00000001175	0.441006	6.32835	2.91357	0.0878374	0.76322	ENSGALG00000001175	ENSGALG00000001175.6	C4BPA	complement component 4 binding protein, alpha [Source:NCBI gene;Acc:395384]	26	2687134	2698396	protein_coding	1		C4BPA
ENSGALG00000003383	0.437753	5.70763	2.90997	0.0880334	0.764378	ENSGALG00000003383	ENSGALG00000003383.6	KPNA6	karyopherin subunit alpha 6 [Source:NCBI gene;Acc:419656]	23	5323393	5339496	protein_coding	-1		KPNA6
ENSGALG00000010122	-0.527091	5.30366	2.90742	0.088173	0.765046	ENSGALG00000010122	ENSGALG00000010122.7	SH2D4A	SH2 domain containing 4A [Source:NCBI gene;Acc:422487]	4	34067371	34079449	protein_coding	1	SH2D4A	SH2D4A
ENSGALG00000011531	0.598787	4.22813	2.90435	0.0883409	0.765264	ENSGALG00000011531	ENSGALG00000011531.6	APAF1	apoptotic peptidase activating factor 1 [Source:NCBI gene;Acc:417926]	1	46718130	46743511	protein_coding	1	APAF1	APAF1
ENSGALG00000012988	-0.556891	5.61864	2.90427	0.088345	0.765264	ENSGALG00000012988	ENSGALG00000012988.7	B4GALNT3	beta-1,4-N-acetyl-galactosaminyltransferase 3 [Source:NCBI gene;Acc:418150]	1	60296873	60354263	protein_coding	1	B4GALNT3	B4GALNT3
ENSGALG00000002046	-0.731977	3.12101	2.90296	0.0884171	0.765264	ENSGALG00000002046	ENSGALG00000002046.7		synaptotagmin 15 [Source:NCBI gene;Acc:423614]	6	3438309	3449439	protein_coding	-1		SYT15
ENSGALG00000051146	-0.586592	7.35262	2.90237	0.0884495	0.765264	ENSGALG00000051146	ENSGALG00000051146.1	TLE5	amino-terminal enhancer of split [Source:NCBI gene;Acc:100858542]	28	1336795	1346054	protein_coding	-1	TLE5	AES
ENSGALG00000038671	0.691146	7.34642	2.90058	0.0885475	0.765568	ENSGALG00000038671	ENSGALG00000038671.2		uncharacterized LOC422090 [Source:NCBI gene;Acc:422090]	18	9873216	9874223	protein_coding	1		LOC422090
ENSGALG00000016766	0.402368	5.04996	2.8986	0.0886564	0.765966	ENSGALG00000016766	ENSGALG00000016766.7	REV1	REV1, DNA directed polymerase [Source:NCBI gene;Acc:418703]	1	133893037	133946308	protein_coding	-1		REV1
ENSGALG00000014984	0.864883	0.715188	2.89696	0.088747	0.766206	ENSGALG00000014984	ENSGALG00000014984.6	F2RL1	F2R like trypsin receptor 1 [Source:NCBI gene;Acc:427213]	Z	23413354	23422556	protein_coding	-1		F2RL1
ENSGALG00000015020	-0.485508	4.5723	2.89194	0.0890238	0.767516	ENSGALG00000015020	ENSGALG00000015020.6	TMEM171	transmembrane protein 174 [Source:NCBI gene;Acc:768886]	Z	24901868	24918432	protein_coding	-1	TMEM171	TMEM174
ENSGALG00000024056	-0.531237	7.25386	2.89192	0.0890248	0.767516	ENSGALG00000024056	ENSGALG00000024056.4	CHST3	carbohydrate sulfotransferase 3 [Source:NCBI gene;Acc:396018]	6	12683537	12689040	protein_coding	1		CHST3
ENSGALG00000026838	0.433921	6.49594	2.88818	0.0892319	0.768738	ENSGALG00000026838	ENSGALG00000026838.3	MDFIC	MyoD family inhibitor domain containing [Source:NCBI gene;Acc:417774]	1	25905669	25955951	protein_coding	-1	MDFIC	MDFIC
ENSGALG00000040662	0.403727	5.76032	2.88645	0.0893274	0.768738	ENSGALG00000040662	ENSGALG00000040662.2	HSF3	Heat shock factor protein 3 [Source:NCBI gene;Acc:422169]	4	282370	297464	protein_coding	-1		HSF3
ENSGALG00000035052	-0.929235	1.01589	2.88594	0.0893558	0.768738	ENSGALG00000035052	ENSGALG00000035052.2	BMP3	bone morphogenetic protein 3 [Source:NCBI gene;Acc:422581]	4	45457337	45471666	protein_coding	1		BMP3
ENSGALG00000004845	-0.461054	4.2106	2.88335	0.0894997	0.769193	ENSGALG00000004845	ENSGALG00000004845.6	TIMM10	translocase of inner mitochondrial membrane 10 [Source:NCBI gene;Acc:425202]	5	17262339	17262897	protein_coding	1		TIMM10
ENSGALG00000042063	0.538903	5.04184	2.88052	0.0896569	0.769193	ENSGALG00000042063	ENSGALG00000042063.2	EPDR1	ependymin related 1 [Source:NCBI gene;Acc:420731]	2	46065864	46094828	protein_coding	-1	EPDR1	EPDR1
ENSGALG00000038433	-0.860618	6.96611	2.87996	0.0896885	0.769193	ENSGALG00000038433	ENSGALG00000038433.2	SPON2	spondin 2 [Source:NCBI gene;Acc:422905]	4	84851297	84898911	protein_coding	1	SPON2	SPON2
ENSGALG00000002389	0.439683	5.0194	2.87871	0.0897578	0.769193	ENSGALG00000002389	ENSGALG00000002389.6		integrin subunit beta 4 [Source:NCBI gene;Acc:417374]	18	4720956	4740037	pseudogene	-1		ITGB4
ENSGALG00000009864	0.763099	1.29671	2.87574	0.0899236	0.769193	ENSGALG00000009864	ENSGALG00000009864.7	TRAF5	TNF receptor associated factor 5 [Source:NCBI gene;Acc:374055]	3	22364629	22387324	protein_coding	-1		TRAF5
ENSGALG00000031789	0.41295	4.94822	2.87345	0.0900516	0.769193	ENSGALG00000031789	ENSGALG00000031789.2		germ cell-less, spermatogenesis associated 1 [Source:NCBI gene;Acc:426327]	22	4038737	4050132	protein_coding	1		GMCL1
ENSGALG00000016196	-0.56191	4.48431	2.87345	0.0900518	0.769193	ENSGALG00000016196	ENSGALG00000016196.6		cystathionine-beta-synthase like [Source:NCBI gene;Acc:418545]	1	111011328	111035262	protein_coding	-1		CBSL
ENSGALG00000036069	0.456574	4.36034	2.87323	0.0900637	0.769193	ENSGALG00000036069	ENSGALG00000036069.2	TCIRG1	T-cell immune regulator 1, ATPase H+ transporting V0 subunit a3 [Source:NCBI gene;Acc:395472]	5	526897	533211	protein_coding	-1		TCIRG1
ENSGALG00000009153	-0.530406	7.92709	2.87151	0.09016	0.769193	ENSGALG00000009153	ENSGALG00000009153.7	COPA	coatomer protein complex subunit alpha [Source:NCBI gene;Acc:426906]	25	2291057	2407537	protein_coding	-1		COPA
ENSGALG00000038043	-0.460802	4.77584	2.87146	0.0901629	0.769193	ENSGALG00000038043	ENSGALG00000038043.2	HECTD2	HECT domain E3 ubiquitin protein ligase 2 [Source:NCBI gene;Acc:427031]	6	20620876	20653897	protein_coding	1	HECTD2	HECTD2
ENSGALG00000016173	0.855552	0.347464	2.87124	0.0901755	0.769193	ENSGALG00000016173	ENSGALG00000016173.7	UBASH3A	ubiquitin associated and SH3 domain containing A [Source:NCBI gene;Acc:418535]	1	110728999	110753448	protein_coding	1		UBASH3A
ENSGALG00000011361	-0.429167	4.35496	2.87051	0.0902165	0.769193	ENSGALG00000011361	ENSGALG00000011361.6	CRYZ	crystallin zeta [Source:NCBI gene;Acc:772289]	8	29982323	29988079	protein_coding	-1		CRYZ
ENSGALG00000044851	-0.787354	6.16329	2.87027	0.0902296	0.769193	ENSGALG00000044851	ENSGALG00000044851.2		inter-alpha-trypsin inhibitor heavy chain family member 6 [Source:NCBI gene;Acc:430871]	KZ626836.1	255656	259209	protein_coding	-1		ITIH6
ENSGALG00000012618	0.627779	3.10153	2.86782	0.090367	0.76963	ENSGALG00000012618	ENSGALG00000012618.7	FANCC	Fanconi anemia complementation group C [Source:NCBI gene;Acc:427468]	Z	41672485	41742224	protein_coding	-1		FANCC
ENSGALG00000034688	0.628337	3.12202	2.86711	0.0904072	0.76963	ENSGALG00000034688	ENSGALG00000034688.2	TIMELESS	timeless circadian clock [Source:NCBI gene;Acc:101751192]	33	6926210	6933386	protein_coding	1	TIMELESS	TIMELESS
ENSGALG00000040484	-0.52718	8.54306	2.864	0.0905821	0.770068	ENSGALG00000040484	ENSGALG00000040484.3	SEC31A	SEC31 homolog A, COPII coat complex component [Source:NCBI gene;Acc:422597]	4	46324923	46359132	protein_coding	1		SEC31A
ENSGALG00000036240	1.14033	2.97848	2.86394	0.0905851	0.770068	ENSGALG00000036240	ENSGALG00000036240.2	AKAP12	A-kinase anchoring protein 12 [Source:NCBI gene;Acc:421634]	3	48927875	48943197	protein_coding	1	AKAP12	AKAP12
ENSGALG00000028222	0.755781	0.831797	2.86021	0.0907956	0.77132	ENSGALG00000028222	ENSGALG00000028222.4		uncharacterized LOC422295 [Source:NCBI gene;Acc:422295]	4	10977328	10983991	protein_coding	-1		LOC422295
ENSGALG00000023541	0.489049	3.57427	2.85644	0.0910089	0.772148	ENSGALG00000023541	ENSGALG00000023541.4	SPHK1	sphingosine kinase 1 [Source:NCBI gene;Acc:427803]	18	4429920	4435069	protein_coding	-1	SPHK1	SPHK1
ENSGALG00000032803	0.607177	4.21691	2.85222	0.0912479	0.772148	ENSGALG00000032803	ENSGALG00000032803.2		proto-oncogene Mas-like [Source:NCBI gene;Acc:776507]	5	120674	122219	protein_coding	1		LOC776507
ENSGALG00000004365	0.873146	1.10797	2.85074	0.0913321	0.772148	ENSGALG00000004365	ENSGALG00000004365.7			15	5996365	6006391	protein_coding	1
ENSGALG00000007195	-0.411446	4.42683	2.85026	0.091359	0.772148	ENSGALG00000007195	ENSGALG00000007195.6		glutamyl-tRNA amidotransferase subunit C [Source:NCBI gene;Acc:416976]	15	9576607	9578666	protein_coding	-1		GATC
ENSGALG00000002554	-0.663535	7.30321	2.84994	0.0913771	0.772148	ENSGALG00000002554	ENSGALG00000002554.6	TSPAN2	tetraspanin 2 [Source:NCBI gene;Acc:419889]	26	3987326	4005185	protein_coding	-1	TSPAN2	TSPAN2
ENSGALG00000012801	-0.746398	9.16985	2.849	0.0914308	0.772148	ENSGALG00000012801	ENSGALG00000012801.5	LY86	lymphocyte antigen 86 [Source:NCBI gene;Acc:420872]	2	64889269	64914270	protein_coding	-1		LY86
ENSGALG00000000684	-0.796901	0.807173	2.84825	0.0914733	0.772148	ENSGALG00000000684	ENSGALG00000000684.6	KLHDC8A	kelch domain containing 8A [Source:NCBI gene;Acc:419829]	26	2090546	2094449	protein_coding	-1	KLHDC8A	KLHDC8A
ENSGALG00000028318	0.60459	3.78483	2.84802	0.0914867	0.772148	ENSGALG00000028318	ENSGALG00000028318.3	CDKN1A	cyclin dependent kinase inhibitor 1A [Source:NCBI gene;Acc:378914]	26	1599230	1602396	protein_coding	1		CDKN1A
ENSGALG00000038290	-0.66687	10.2732	2.84601	0.0916013	0.772148	ENSGALG00000038290	ENSGALG00000038290.3	P4HB	prolyl 4-hydroxylase subunit beta [Source:NCBI gene;Acc:374091]	18	9917130	9925495	protein_coding	-1		P4HB
ENSGALG00000002525	0.683462	2.72529	2.84505	0.0916559	0.772148	ENSGALG00000002525	ENSGALG00000002525.7	RASGEF1A	RasGEF domain family member 1A [Source:NCBI gene;Acc:423631]	6	5430790	5475162	protein_coding	1	RASGEF1A	RASGEF1A
ENSGALG00000031408	0.717207	1.78623	2.84488	0.0916654	0.772148	ENSGALG00000031408	ENSGALG00000031408.3	SORD	sorbitol dehydrogenase [Source:NCBI gene;Acc:415332]	10	1522444	1539392	protein_coding	-1		SORD
ENSGALG00000015712	1.09142	2.48612	2.84434	0.0916962	0.772148	ENSGALG00000015712	ENSGALG00000015712.6	SLBP	stem-loop binding protein [Source:NCBI gene;Acc:422902]	4	83930355	83937106	protein_coding	1		SLBP
ENSGALG00000031430	0.674547	4.21439	2.84287	0.0917801	0.772148	ENSGALG00000031430	ENSGALG00000031430.2		selectin E [Source:NCBI gene;Acc:424402]	8	5495630	5502809	protein_coding	1		SELE
ENSGALG00000006427	-0.391698	5.54941	2.84279	0.0917846	0.772148	ENSGALG00000006427	ENSGALG00000006427.7	CARS	cysteinyl-tRNA synthetase [Source:NCBI gene;Acc:423086]	5	13266596	13301342	protein_coding	1		CARS
ENSGALG00000008153	0.894556	1.24043	2.84166	0.0918491	0.772148	ENSGALG00000008153	ENSGALG00000008153.7		interleukin 15 receptor, alpha [Source:NCBI gene;Acc:416686]	1	1649616	1654200	lncRNA	1		IL15RA
ENSGALG00000002832	0.50295	4.47594	2.83959	0.0919676	0.772148	ENSGALG00000002832	ENSGALG00000002832.6	IFI35	interferon-induced protein 35 [Source:NCBI gene;Acc:420011]	27	7921645	7924699	protein_coding	1	IFI35	IFI35
ENSGALG00000030011	0.368846	4.98638	2.83954	0.0919707	0.772148	ENSGALG00000030011	ENSGALG00000030011.3	ZNF704	zinc finger protein 704 [Source:NCBI gene;Acc:420194]	2	121005791	121083584	protein_coding	-1	ZNF704	ZNF704
ENSGALG00000001335	-0.46495	7.09455	2.83841	0.092035	0.772156	ENSGALG00000001335	ENSGALG00000001335.5	FAM18B1	family with sequence similarity 18, member B1 [Source:NCBI gene;Acc:417324]	18	2248818	2255712	protein_coding	1		FAM18B1
ENSGALG00000008321	0.528008	3.55892	2.83323	0.0923323	0.774117	ENSGALG00000008321	ENSGALG00000008321.6	RNPEPL1	arginyl aminopeptidase like 1 [Source:NCBI gene;Acc:424946]	9	15868999	15880630	protein_coding	-1	RNPEPL1	RNPEPL1
ENSGALG00000029819	0.793796	0.721097	2.83146	0.0924345	0.774441	ENSGALG00000029819	ENSGALG00000029819.2	SCG2	secretogranin II [Source:NCBI gene;Acc:101750767]	9	8387258	8389147	protein_coding	-1	SCG2	SCG2
ENSGALG00000006460	0.844287	3.09437	2.82846	0.0926071	0.775353	ENSGALG00000006460	ENSGALG00000006460.6	TTLL9	tubulin tyrosine ligase like 9 [Source:NCBI gene;Acc:771843]	20	10075293	10086559	protein_coding	1	TTLL9	TTLL9
ENSGALG00000005656	0.436314	4.126	2.82602	0.0927479	0.775495	ENSGALG00000005656	ENSGALG00000005656.6	DENND6A	DENN domain containing 6A [Source:NCBI gene;Acc:416006]	12	9131936	9151391	protein_coding	-1		DENND6A
ENSGALG00000043118	-0.487374	7.80731	2.8259	0.0927551	0.775495	ENSGALG00000043118	ENSGALG00000043118.2	ATP10A	ATPase phospholipid transporting 10A (putative) [Source:NCBI gene;Acc:418685]	1	132986041	133096377	protein_coding	1	ATP10A	ATP10A
ENSGALG00000035498	0.4811	4.08643	2.82486	0.0928149	0.775495	ENSGALG00000035498	ENSGALG00000035498.3	INPP5D	inositol polyphosphate-5-phosphatase D [Source:NCBI gene;Acc:424745]	9	1294733	1337979	protein_coding	1	INPP5D	INPP5D
ENSGALG00000030028	-0.533994	3.33993	2.82266	0.0929421	0.775738	ENSGALG00000030028	ENSGALG00000030028.3	MRPS14	mitochondrial ribosomal protein S14 [Source:NCBI gene;Acc:424436]	8	7476798	7479199	protein_coding	1		MRPS14
ENSGALG00000030964	-0.724401	2.34987	2.82216	0.0929714	0.775738	ENSGALG00000030964	ENSGALG00000030964.3	LRRC20	leucine rich repeat containing 20 [Source:NCBI gene;Acc:769461]	6	12233307	12235990	protein_coding	-1		LRRC20
ENSGALG00000043675	0.582876	4.55725	2.819	0.0931543	0.776733	ENSGALG00000043675	ENSGALG00000043675.2	ANTXR2	ANTXR cell adhesion molecule 2 [Source:NCBI gene;Acc:422580]	4	45202097	45302156	protein_coding	-1	ANTXR2	ANTXR2
ENSGALG00000008231	-0.533029	6.8807	2.81564	0.0933499	0.777831	ENSGALG00000008231	ENSGALG00000008231.5	PACSIN3	protein kinase C and casein kinase substrate in neurons 3 [Source:NCBI gene;Acc:423186]	5	23406293	23426262	protein_coding	1		PACSIN3
ENSGALG00000016476	0.586845	2.90058	2.8131	0.0934976	0.778181	ENSGALG00000016476	ENSGALG00000016476.7	TTC32	tetratricopeptide repeat domain 32 [Source:NCBI gene;Acc:769943]	3	101353096	101354281	protein_coding	-1	TTC32	TTC32
ENSGALG00000015627	-0.851317	10.6746	2.81178	0.0935746	0.778181	ENSGALG00000015627	ENSGALG00000015627.7	HAPLN1	hyaluronan and proteoglycan link protein 1 [Source:NCBI gene;Acc:396475]	Z	62725137	62818255	protein_coding	1		HAPLN1
ENSGALG00000006670	-0.702108	5.00534	2.81162	0.0935836	0.778181	ENSGALG00000006670	ENSGALG00000006670.4	PPP1R3C	protein phosphatase 1 regulatory subunit 3C [Source:NCBI gene;Acc:425328]	6	20695689	20699934	protein_coding	-1	PPP1R3C	PPP1R3C
ENSGALG00000011080	0.690751	3.90395	2.80544	0.0939451	0.780242	ENSGALG00000011080	ENSGALG00000011080.6	BDKRB2	bradykinin receptor B2 [Source:NCBI gene;Acc:428906]	5	46550123	46571687	protein_coding	1		BDKRB2
ENSGALG00000043606	0.660185	1.84599	2.80506	0.0939675	0.780242	ENSGALG00000043606	ENSGALG00000043606.2			33	7229176	7232142	protein_coding	-1
ENSGALG00000010125	-0.554723	8.51181	2.8041	0.0940236	0.780242	ENSGALG00000010125	ENSGALG00000010125.6	CSGALNACT1	chondroitin sulfate N-acetylgalactosaminyltransferase 1 [Source:NCBI gene;Acc:422488]	4	34082296	34104242	protein_coding	-1	CSGALNACT1	CSGALNACT1
ENSGALG00000014795	0.526489	3.47903	2.79748	0.0944128	0.780536	ENSGALG00000014795	ENSGALG00000014795.6	TGIF1	TGFB induced factor homeobox 1 [Source:NCBI gene;Acc:396339]	2	100818249	100826684	protein_coding	-1		TGIF1
ENSGALG00000005378	-0.46388	4.26024	2.79722	0.0944279	0.780536	ENSGALG00000005378	ENSGALG00000005378.7	ARNTL	aryl hydrocarbon receptor nuclear translocator like [Source:NCBI gene;Acc:374115]	5	7820343	7864789	protein_coding	-1		ARNTL
ENSGALG00000040180	0.741942	4.68558	2.79688	0.0944477	0.780536	ENSGALG00000040180	ENSGALG00000040180.2	CEBPD	CCAAT/enhancer binding protein delta [Source:NCBI gene;Acc:107052707]	2	107911432	107912427	protein_coding	-1	CEBPD	CEBPD
ENSGALG00000033780	0.767444	3.22813	2.79574	0.0945148	0.780536	ENSGALG00000033780	ENSGALG00000033780.2			10	11154128	11166446	protein_coding	1
ENSGALG00000014872	0.655697	4.02961	2.79548	0.0945304	0.780536	ENSGALG00000014872	ENSGALG00000014872.3	FGF10	fibroblast growth factor 10 [Source:NCBI gene;Acc:395432]	Z	13972677	14032776	protein_coding	-1		FGF10
ENSGALG00000028262	0.627857	2.61487	2.79418	0.094607	0.780536	ENSGALG00000028262	ENSGALG00000028262.3		prickle planar cell polarity protein 4 [Source:NCBI gene;Acc:100859351]	26	4965879	4972282	protein_coding	1		PRICKLE4
ENSGALG00000006443	-0.902466	4.06422	2.79417	0.0946075	0.780536	ENSGALG00000006443	ENSGALG00000006443.5	MADPRT1	mono(ADP-ribosyl)transferase 1 [Source:NCBI gene;Acc:428123]	1	195587654	195590524	protein_coding	1		MADPRT1
ENSGALG00000008663	-0.472234	4.20292	2.79301	0.0946762	0.780536	ENSGALG00000008663	ENSGALG00000008663.6	DDAH1	dimethylarginine dimethylaminohydrolase 1 [Source:NCBI gene;Acc:378898]	8	16625897	16672394	protein_coding	1		DDAH1
ENSGALG00000001965	-0.408654	6.43904	2.79281	0.0946879	0.780536	ENSGALG00000001965	ENSGALG00000001965.7	AARS	alanyl-tRNA synthetase [Source:NCBI gene;Acc:415668]	11	1173212	1185606	protein_coding	1		AARS
ENSGALG00000054057	0.589264	3.13851	2.79043	0.0948288	0.780536	ENSGALG00000054057	ENSGALG00000054057.1			3	51757870	51768812	protein_coding	1
ENSGALG00000002882	-0.428536	4.57741	2.79008	0.0948498	0.780536	ENSGALG00000002882	ENSGALG00000002882.6	BNIP1	BCL2 interacting protein 1 [Source:NCBI gene;Acc:416207]	13	9897119	9902358	protein_coding	1	BNIP1	BNIP1
ENSGALG00000014321	-0.398982	5.10427	2.7884	0.0949492	0.780536	ENSGALG00000014321	ENSGALG00000014321.6	SMIM14	small integral membrane protein 14 [Source:NCBI gene;Acc:422793]	4	69214818	69251117	protein_coding	1		SMIM14
ENSGALG00000000818	0.543759	3.45395	2.78698	0.0950334	0.780536	ENSGALG00000000818	ENSGALG00000000818.7		leucine rich repeat containing 32 [Source:NCBI gene;Acc:428121]	1	195032674	195039220	protein_coding	1		LRRC32
ENSGALG00000010149	0.588971	4.74353	2.78561	0.0951148	0.780536	ENSGALG00000010149	ENSGALG00000010149.6	CMTR1	cap methyltransferase 1 [Source:NCBI gene;Acc:421434]	3	30280731	30303453	protein_coding	-1	CMTR1	CMTR1
ENSGALG00000051984	-0.993756	3.22406	2.78558	0.0951165	0.780536	ENSGALG00000051984	ENSGALG00000051984.1		cadherin 3 [Source:NCBI gene;Acc:414845]	11	18864163	18869862	pseudogene	1		CDH3
ENSGALG00000044226	0.739961	1.34628	2.78523	0.0951369	0.780536	ENSGALG00000044226	ENSGALG00000044226.2		C-type lectin domain family 17 member A [Source:NCBI gene;Acc:426106]	30	600218	605036	protein_coding	1		CLEC17A
ENSGALG00000052876	-0.680334	1.18956	2.78504	0.0951483	0.780536	ENSGALG00000052876	ENSGALG00000052876.1		zinc finger protein 239-like [Source:NCBI gene;Acc:107049095]	16	1714898	1717308	protein_coding	-1		LOC107049095
ENSGALG00000009365	-0.537449	6.57722	2.78283	0.0952799	0.780757	ENSGALG00000009365	ENSGALG00000009365.7	CYP51A1	cytochrome P450 family 51 subfamily A member 1 [Source:NCBI gene;Acc:420548]	2	22493952	22507735	protein_coding	-1		CYP51A1
ENSGALG00000026192	0.610326	2.6712	2.78243	0.0953034	0.780757	ENSGALG00000026192	ENSGALG00000026192.3	ST8SIA4	ST8 alpha-N-acetyl-neuraminide alpha-2,8-sialyltransferase 4 [Source:NCBI gene;Acc:374155]	Z	50730982	50785339	protein_coding	1		ST8SIA4
ENSGALG00000004215	-0.500404	7.02162	2.77732	0.0956082	0.7813	ENSGALG00000004215	ENSGALG00000004215.7	WIPI1	WD repeat domain, phosphoinositide interacting 1 [Source:NCBI gene;Acc:417437]	18	7826149	7844274	protein_coding	-1	WIPI1	WIPI1
ENSGALG00000023689	0.527588	5.94866	2.77619	0.0956757	0.7813	ENSGALG00000023689	ENSGALG00000023689.4	ASS1	argininosuccinate synthase 1 [Source:NCBI gene;Acc:417185]	17	6180976	6201571	protein_coding	1		ASS1
ENSGALG00000002729	-0.48129	5.44702	2.77501	0.0957461	0.7813	ENSGALG00000002729	ENSGALG00000002729.6	GK5	glycerol kinase 5 (putative) [Source:NCBI gene;Acc:424779]	9	10550183	10571324	protein_coding	-1		GK5
ENSGALG00000015787	-0.433286	4.46672	2.77422	0.0957935	0.7813	ENSGALG00000015787	ENSGALG00000015787.6	RNGTT	RNA guanylyltransferase and 5'-phosphatase [Source:NCBI gene;Acc:421819]	3	75847300	76033360	protein_coding	1	RNGTT	RNGTT
ENSGALG00000003794	-0.402966	5.24588	2.77373	0.0958227	0.7813	ENSGALG00000003794	ENSGALG00000003794.7	SLC35E1	solute carrier family 35 member E1 [Source:NCBI gene;Acc:420143]	28	4412468	4417567	protein_coding	1	SLC35E1	SLC35E1
ENSGALG00000050315	0.521896	4.99413	2.77344	0.09584	0.7813	ENSGALG00000050315	ENSGALG00000050315.1	CLC2DL3	C-type lectin domain family 2 member D-like 3 [Source:NCBI gene;Acc:425783]	1	216908	303711	protein_coding	1		CLC2DL3
ENSGALG00000052684	-0.408508	5.30502	2.77234	0.0959061	0.7813	ENSGALG00000052684	ENSGALG00000052684.1			1	194147757	194175070	protein_coding	-1
ENSGALG00000033090	-0.743317	3.20686	2.77211	0.0959198	0.7813	ENSGALG00000033090	ENSGALG00000033090.2	VDR	vitamin D (1,25- dihydroxyvitamin D3) receptor [Source:NCBI gene;Acc:395988]	33	7324160	7351020	protein_coding	1		VDR
ENSGALG00000000461	-0.628583	10.2183	2.77166	0.0959468	0.7813	ENSGALG00000000461	ENSGALG00000000461.7	MRC2	mannose receptor C type 2 [Source:NCBI gene;Acc:419950]	27	4832151	4845337	protein_coding	1	MRC2	MRC2
ENSGALG00000001483	-0.62674	8.01295	2.76947	0.0960782	0.781461	ENSGALG00000001483	ENSGALG00000001483.6		Golgi integral membrane protein 4-like [Source:NCBI gene;Acc:419409]	21	2089567	2112355	protein_coding	1		LOC419409
ENSGALG00000008378	0.51038	4.33783	2.76919	0.0960949	0.781461	ENSGALG00000008378	ENSGALG00000008378.7	SRGAP3	SLIT-ROBO Rho GTPase activating protein 3 [Source:NCBI gene;Acc:416115]	12	19736835	19803309	protein_coding	-1		SRGAP3
ENSGALG00000019543	-0.580898	2.77659	2.76684	0.096236	0.782086	ENSGALG00000019543	ENSGALG00000019543.5	OTULIN	family with sequence similarity 105, member B [Source:NCBI gene;Acc:427097]	2	76264871	76273509	protein_coding	-1	OTULIN	FAM105B
ENSGALG00000030179	0.605947	3.23551	2.76537	0.0963247	0.782285	ENSGALG00000030179	ENSGALG00000030179.2		chromosome 6 C10orf54 homolog [Source:NCBI gene;Acc:769500]	6	12620516	12626469	protein_coding	-1		C6H10orf54
ENSGALG00000001239	-0.634617	6.84301	2.76221	0.0965151	0.783309	ENSGALG00000001239	ENSGALG00000001239.6	SLC26A2	E3 ubiquitin/ISG15 ligase TRIM25-like [Source:NCBI gene;Acc:416147]	13	9062003	9071099	protein_coding	-1	SLC26A2	LOC416147
ENSGALG00000049007	0.676317	1.51759	2.74975	0.0972697	0.788325	ENSGALG00000049007	ENSGALG00000049007.1			19	7786929	7793982	lncRNA	1
ENSGALG00000029390	-0.515554	3.24431	2.7496	0.0972788	0.788325	ENSGALG00000029390	ENSGALG00000029390.3	C15H12ORF65	chromosome 15 open reading frame, human C12orf65 [Source:NCBI gene;Acc:416827]	15	5354761	5356086	protein_coding	-1		C15H12ORF65
ENSGALG00000006409	0.45951	6.44313	2.74753	0.0974049	0.788325	ENSGALG00000006409	ENSGALG00000006409.6	PODXL	podocalyxin like [Source:NCBI gene;Acc:395755]	1	3688056	3728758	protein_coding	1		PODXL
ENSGALG00000036556	0.459518	6.08709	2.74679	0.0974502	0.788325	ENSGALG00000036556	ENSGALG00000036556.3	MORC4	MORC family CW-type zinc finger 4 [Source:NCBI gene;Acc:418513]	1	107973719	108001586	protein_coding	1		MORC4
ENSGALG00000005180	-0.85601	13.1223	2.74668	0.0974567	0.788325	ENSGALG00000005180	ENSGALG00000005180.7			8	11693571	11741165	protein_coding	1
ENSGALG00000045312	0.766545	1.85857	2.74526	0.0975432	0.78834	ENSGALG00000045312	ENSGALG00000045312.2	SEMA6C	semaphorin 6C [Source:NCBI gene;Acc:100859892]	25	242766	248366	protein_coding	-1	SEMA6C	SEMA6C
ENSGALG00000006326	-0.619807	2.76122	2.74453	0.097588	0.78834	ENSGALG00000006326	ENSGALG00000006326.7	MIF	macrophage migration inhibitory factor (glycosylation-inhibiting factor) [Source:NCBI gene;Acc:100857237]	15	8375207	8377034	protein_coding	1		MIF
ENSGALG00000047468	0.590048	2.518	2.7394	0.0979018	0.790226	ENSGALG00000047468	ENSGALG00000047468.1			KZ626837.1	1753592	1755974	lncRNA	-1
ENSGALG00000000593	-0.803752	1.28547	2.73859	0.0979512	0.790226	ENSGALG00000000593	ENSGALG00000000593.7		uncharacterized LOC426710 [Source:NCBI gene;Acc:426710]	4	60162363	60166294	protein_coding	1		LOC426710
ENSGALG00000042883	0.57487	5.08721	2.73198	0.0983575	0.792979	ENSGALG00000042883	ENSGALG00000042883.2	VCPIP1	valosin containing protein interacting protein 1 [Source:NCBI gene;Acc:428359]	2	115177217	115191152	protein_coding	-1		VCPIP1
ENSGALG00000016673	-0.444933	5.9044	2.72912	0.0985335	0.793873	ENSGALG00000016673	ENSGALG00000016673.6	TRAM2	translocation associated membrane protein 2 [Source:NCBI gene;Acc:422040]	3	107485825	107498655	protein_coding	1	TRAM2	TRAM2
ENSGALG00000026781	0.760222	2.9102	2.72774	0.0986189	0.794035	ENSGALG00000026781	ENSGALG00000026781.3	ALOX5AP	arachidonate 5-lipoxygenase activating protein [Source:NCBI gene;Acc:770904]	1	176416571	176424666	protein_coding	-1		ALOX5AP
ENSGALG00000007970	0.452106	4.78799	2.72425	0.0988346	0.795246	ENSGALG00000007970	ENSGALG00000007970.6	PIAS1	protein inhibitor of activated STAT 1 [Source:NCBI gene;Acc:427514]	10	19522398	19573066	protein_coding	1		PIAS1
ENSGALG00000053923	-0.507989	3.54693	2.7212	0.0990235	0.796033	ENSGALG00000053923	ENSGALG00000053923.1			32	714524	716221	lncRNA	1
ENSGALG00000029912	-0.462908	3.682	2.72055	0.0990639	0.796033	ENSGALG00000029912	ENSGALG00000029912.2	CAMK1	calcium/calmodulin dependent protein kinase I [Source:NCBI gene;Acc:416049]	12	11875094	11877807	protein_coding	-1	CAMK1	CAMK1
ENSGALG00000008933	0.657026	2.56417	2.71738	0.0992608	0.796033	ENSGALG00000008933	ENSGALG00000008933.5	CASP7	caspase 7 [Source:NCBI gene;Acc:423901]	6	28458646	28478945	protein_coding	1	CASP7	CASP7
ENSGALG00000027853	-0.5461	3.60707	2.71652	0.0993144	0.796033	ENSGALG00000027853	ENSGALG00000027853.3	CTNNA2	catenin alpha 2 [Source:NCBI gene;Acc:396035]	4	87427085	87823826	protein_coding	-1		CTNNA2
ENSGALG00000014649	0.487952	4.30091	2.71606	0.099343	0.796033	ENSGALG00000014649	ENSGALG00000014649.5	MBLAC2	metallo-beta-lactamase domain containing 2 [Source:NCBI gene;Acc:431565]	Z	59920983	59929566	protein_coding	1		MBLAC2
ENSGALG00000010633	-0.498426	6.74309	2.71528	0.0993915	0.796033	ENSGALG00000010633	ENSGALG00000010633.7	GPX7	glutathione peroxidase 7 [Source:NCBI gene;Acc:424643]	8	24796809	24805423	protein_coding	1		GPX7
ENSGALG00000042833	0.387434	4.86222	2.71491	0.0994147	0.796033	ENSGALG00000042833	ENSGALG00000042833.2	MAPK14	mitogen-activated protein kinase 14 [Source:NCBI gene;Acc:421183]	26	148699	169260	protein_coding	1	MAPK14	MAPK14
ENSGALG00000040291	0.474793	4.36203	2.71426	0.0994551	0.796033	ENSGALG00000040291	ENSGALG00000040291.2		rho-related BTB domain-containing protein 2-like [Source:NCBI gene;Acc:107056274]	4	90975706	90984000	protein_coding	1		LOC107056274
ENSGALG00000023904	-0.654943	9.07216	2.70983	0.0997317	0.797722	ENSGALG00000023904	ENSGALG00000023904.4	FIBIN	fin bud initiation factor homolog (zebrafish) [Source:NCBI gene;Acc:426933]	5	3728374	3730202	protein_coding	1		FIBIN
ENSGALG00000023517	0.407772	4.53457	2.70773	0.099863	0.798067	ENSGALG00000023517	ENSGALG00000023517.4	AGPAT2	1-acylglycerol-3-phosphate O-acyltransferase 2 [Source:NCBI gene;Acc:772114]	17	8036089	8043918	protein_coding	1	AGPAT2	AGPAT2
ENSGALG00000035282	0.676109	3.11158	2.70676	0.099924	0.798067	ENSGALG00000035282	ENSGALG00000035282.2	IGF2	insulin like growth factor 2 [Source:NCBI gene;Acc:395097]	5	13971786	13980128	protein_coding	1		IGF2
ENSGALG00000006015	-0.430284	7.11044	2.706	0.0999713	0.798067	ENSGALG00000006015	ENSGALG00000006015.7	COPB1	coatomer protein complex subunit beta 1 [Source:NCBI gene;Acc:423063]	5	10651664	10668952	protein_coding	-1		COPB1
ENSGALG00000032736	0.454524	4.94818	2.7047	0.100053	0.798142	ENSGALG00000032736	ENSGALG00000032736.2	MGLL	monoglyceride lipase [Source:NCBI gene;Acc:416024]	12	9973818	10066081	protein_coding	1		MGLL
ENSGALG00000009898	0.419359	4.62006	2.70282	0.100171	0.798142	ENSGALG00000009898	ENSGALG00000009898.6	GAB1	GRB2 associated binding protein 1 [Source:NCBI gene;Acc:422456]	4	30455566	30578444	protein_coding	1	GAB1	GAB1
ENSGALG00000011476	-0.421256	5.35454	2.70218	0.100211	0.798142	ENSGALG00000011476	ENSGALG00000011476.7	SEPTIN11	septin 11 [Source:NCBI gene;Acc:422635]	4	49658327	49708196	protein_coding	-1	SEPTIN11	SEPTIN11
ENSGALG00000043831	-0.672558	4.76755	2.70078	0.100299	0.798142	ENSGALG00000043831	ENSGALG00000043831.3	LRRC73	leucine rich repeat containing 73 [Source:NCBI gene;Acc:421454]	3	31044021	31050599	protein_coding	1		LRRC73
ENSGALG00000015216	0.80329	0.802685	2.70064	0.100308	0.798142	ENSGALG00000015216	ENSGALG00000015216.6	SYK	spleen associated tyrosine kinase [Source:NCBI gene;Acc:427272]	Z	44075509	44125480	protein_coding	1		SYK
ENSGALG00000030012	-0.830469	0.626772	2.69802	0.100473	0.798286	ENSGALG00000030012	ENSGALG00000030012.2	EMILIN3	elastin microfibril interfacer 3 [Source:NCBI gene;Acc:428137]	20	4974113	4980108	protein_coding	-1	EMILIN3	EMILIN3
ENSGALG00000012200	0.742088	1.22836	2.69801	0.100474	0.798286	ENSGALG00000012200	ENSGALG00000012200.5	GCH1	GTP cyclohydrolase 1 [Source:NCBI gene;Acc:396146]	5	56530534	56547633	protein_coding	1		GCH1
ENSGALG00000006526	-0.663557	4.59093	2.69666	0.100559	0.798286	ENSGALG00000006526	ENSGALG00000006526.6	PLXNB3	plexin B3 [Source:NCBI gene;Acc:100859325]	12	11683446	11738536	protein_coding	1		PLXNB3
ENSGALG00000012505	-0.813216	1.97883	2.69619	0.100588	0.798286	ENSGALG00000012505	ENSGALG00000012505.6	LRFN5	leucine rich repeat and fibronectin type III domain containing 5 [Source:NCBI gene;Acc:423599]	5	59650477	59690594	protein_coding	-1	LRFN5	LRFN5
ENSGALG00000015746	0.538906	3.86843	2.69398	0.100728	0.798696	ENSGALG00000015746	ENSGALG00000015746.6	JAM2	junctional adhesion molecule 2 [Source:NCBI gene;Acc:418476]	1	103822633	103856294	protein_coding	1		JAM2
ENSGALG00000034326	0.958711	1.15339	2.69329	0.100771	0.798696	ENSGALG00000034326	ENSGALG00000034326.2	TMEM158	transmembrane protein 158 [Source:NCBI gene;Acc:776186]	2	42973622	42974929	protein_coding	1	TMEM158	TMEM158
ENSGALG00000032660	0.469567	5.70828	2.69072	0.100934	0.799466	ENSGALG00000032660	ENSGALG00000032660.2	IFNGR2	interferon gamma receptor 2 (interferon gamma transducer 1) [Source:NCBI gene;Acc:418502]	1	106645075	106653536	protein_coding	1		IFNGR2
ENSGALG00000039595	-0.621224	2.70459	2.68757	0.101134	0.800531	ENSGALG00000039595	ENSGALG00000039595.2	BTBD11	BTB domain containing 11 [Source:NCBI gene;Acc:771493]	1	53377416	53545431	protein_coding	-1	BTBD11	BTBD11
ENSGALG00000007419	-0.661385	5.50351	2.68591	0.101239	0.800533	ENSGALG00000007419	ENSGALG00000007419.7	MASP1	mannan binding lectin serine peptidase 1 [Source:NCBI gene;Acc:407088]	9	15017996	15035605	protein_coding	1		MASP1
ENSGALG00000014178	-0.885405	2.63281	2.68475	0.101313	0.800533	ENSGALG00000014178	ENSGALG00000014178.6	SCUBE1	signal peptide, CUB domain and EGF like domain containing 1 [Source:NCBI gene;Acc:418228]	1	68564109	68765156	protein_coding	-1	SCUBE1	SCUBE1
ENSGALG00000049236	-0.634813	2.33126	2.68386	0.10137	0.800533	ENSGALG00000049236	ENSGALG00000049236.1	PEBP4	phosphatidylethanolamine binding protein 4 [Source:NCBI gene;Acc:101747939]	22	1439289	1496589	protein_coding	1	PEBP4	PEBP4
ENSGALG00000012721	0.438621	5.67393	2.68343	0.101397	0.800533	ENSGALG00000012721	ENSGALG00000012721.7	C2H6orf52	chromosome 2 C6orf52 homolog [Source:NCBI gene;Acc:420849]	2	62091157	62100297	protein_coding	-1		C2H6orf52
ENSGALG00000031593	0.553434	5.14606	2.68189	0.101495	0.800788	ENSGALG00000031593	ENSGALG00000031593.2	TMSB15B	thymosin beta 15B [Source:NCBI gene;Acc:100502566]	4	1985097	1986199	protein_coding	1		TMSB15B
ENSGALG00000011271	-0.738837	10.971	2.68055	0.10158	0.800811	ENSGALG00000011271	ENSGALG00000011271.7	LUM	lumican [Source:NCBI gene;Acc:417891]	1	44018283	44031180	protein_coding	-1		LUM
ENSGALG00000012606	0.450408	5.48806	2.67912	0.101672	0.800811	ENSGALG00000012606	ENSGALG00000012606.7	ISCA1	iron-sulfur cluster assembly 1 [Source:NCBI gene;Acc:427463]	Z	40832093	40839365	protein_coding	-1		ISCA1
ENSGALG00000002532	0.673538	3.51629	2.67875	0.101695	0.800811	ENSGALG00000002532	ENSGALG00000002532.5	GJA4	gap junction protein alpha 4 [Source:NCBI gene;Acc:404529]	23	4593526	4596408	protein_coding	-1		GJA4
ENSGALG00000031734	-0.761165	1.50244	2.6748	0.101948	0.801486	ENSGALG00000031734	ENSGALG00000031734.2	AQP11	aquaporin 11 [Source:NCBI gene;Acc:426725]	1	194448531	194462713	protein_coding	-1	AQP11	AQP11
ENSGALG00000007443	0.432432	5.06957	2.6744	0.101974	0.801486	ENSGALG00000007443	ENSGALG00000007443.4	TMLHE	trimethyllysine hydroxylase, epsilon [Source:NCBI gene;Acc:422296]	4	10998969	11014124	protein_coding	-1		TMLHE
ENSGALG00000011214	-0.728919	12.1829	2.67433	0.101979	0.801486	ENSGALG00000011214	ENSGALG00000011214.6	SERPINH1	serpin family H member 1 [Source:NCBI gene;Acc:396228]	1	196648341	196655118	protein_coding	-1		SERPINH1
ENSGALG00000009015	-0.424516	5.90715	2.67065	0.102214	0.802821	ENSGALG00000009015	ENSGALG00000009015.4	PIGK	phosphatidylinositol glycan anchor biosynthesis class K [Source:NCBI gene;Acc:424556]	8	19534794	19598636	protein_coding	1		PIGK
ENSGALG00000017072	0.403629	5.21659	2.6675	0.102417	0.803204	ENSGALG00000017072	ENSGALG00000017072.6		NEDD4 binding protein 2 like 1 [Source:NCBI gene;Acc:418914]	1	175888052	175900559	protein_coding	1		N4BP2L1
ENSGALG00000010554	-0.511896	3.68743	2.66688	0.102457	0.803204	ENSGALG00000010554	ENSGALG00000010554.6		regulator of microtubule dynamics 2 [Source:NCBI gene;Acc:421465]	3	31979443	32020628	protein_coding	1		RMDN2
ENSGALG00000036412	-0.68615	4.03438	2.66681	0.102461	0.803204	ENSGALG00000036412	ENSGALG00000036412.3	TMEM108	transmembrane protein 108 [Source:NCBI gene;Acc:420692]	2	42447408	42553652	protein_coding	1	TMEM108	TMEM108
ENSGALG00000035108	0.604669	4.30176	2.66496	0.10258	0.803483	ENSGALG00000035108	ENSGALG00000035108.3	KDM7A	lysine demethylase 7A [Source:NCBI gene;Acc:418110]	1	56677151	56731558	protein_coding	-1	KDM7A	KDM7A
ENSGALG00000033867	-0.603867	8.92226	2.66421	0.102628	0.803483	ENSGALG00000033867	ENSGALG00000033867.2	PCOLCE	procollagen C-endopeptidase enhancer [Source:HGNC Symbol;Acc:HGNC:8738]	30	968845	973293	protein_coding	-1	PCOLCE
ENSGALG00000009538	-0.48941	4.07599	2.66167	0.102793	0.803743	ENSGALG00000009538	ENSGALG00000009538.6		retinol dehydrogenase 11 (all-trans/9-cis/11-cis) [Source:NCBI gene;Acc:423274]	5	29100045	29107183	protein_coding	1		RDH11
ENSGALG00000012696	0.421784	4.39458	2.65949	0.102933	0.803743	ENSGALG00000012696	ENSGALG00000012696.6	RANBP9	RAN binding protein 9 [Source:HGNC Symbol;Acc:HGNC:13727]	2	60523859	60531947	protein_coding	-1	RANBP9
ENSGALG00000008341	-0.566967	6.9126	2.65916	0.102955	0.803743	ENSGALG00000008341	ENSGALG00000008341.7	FURIN	furin, paired basic amino acid cleaving enzyme [Source:NCBI gene;Acc:395457]	10	20543114	20554250	protein_coding	-1		FURIN
ENSGALG00000053641	-0.683189	1.08678	2.65819	0.103018	0.803743	ENSGALG00000053641	ENSGALG00000053641.1		circadian associated repressor of transcription [Source:NCBI gene;Acc:107055142]	25	3742770	3744406	protein_coding	-1		CIART
ENSGALG00000009807	-0.600236	3.07401	2.65683	0.103106	0.803743	ENSGALG00000009807	ENSGALG00000009807.6	FLVCR1	feline leukemia virus subgroup C cellular receptor 1 [Source:NCBI gene;Acc:421365]	3	21873328	21881217	protein_coding	-1	FLVCR1	FLVCR1
ENSGALG00000039008	0.560103	4.80847	2.65665	0.103117	0.803743	ENSGALG00000039008	ENSGALG00000039008.3		uncharacterized LOC776594 [Source:NCBI gene;Acc:776594]	11	17036585	17046954	protein_coding	1		LOC776594
ENSGALG00000048117	-0.474986	6.55168	2.65656	0.103123	0.803743	ENSGALG00000048117	ENSGALG00000048117.1	DNLZ	DNL-type zinc finger [Source:NCBI gene;Acc:772152]	17	8215642	8222344	protein_coding	1	DNLZ	DNLZ
ENSGALG00000012735	0.818383	0.985308	2.65478	0.103239	0.803796	ENSGALG00000012735	ENSGALG00000012735.7	EDN1	endothelin 1 [Source:NCBI gene;Acc:420854]	2	62675250	62679088	protein_coding	-1	EDN1	EDN1
ENSGALG00000029621	0.457921	4.39075	2.65442	0.103262	0.803796	ENSGALG00000029621	ENSGALG00000029621.2	SEMA3F	semaphorin 3F [Source:NCBI gene;Acc:374109]	12	3580056	3597490	protein_coding	1		SEMA3F
ENSGALG00000049832	0.733382	1.55044	2.65115	0.103475	0.804936	ENSGALG00000049832	ENSGALG00000049832.1			9	8502692	8539903	lncRNA	-1
ENSGALG00000042001	0.65172	5.21172	2.64556	0.103839	0.807256	ENSGALG00000042001	ENSGALG00000042001.2		hect domain and RLD 4-like [Source:NCBI gene;Acc:422513]	4	35025993	35044154	protein_coding	1		LOC422513
ENSGALG00000028302	-0.413293	5.63931	2.64298	0.104008	0.807318	ENSGALG00000028302	ENSGALG00000028302.4	UQCRQ	ubiquinol-cytochrome c reductase complex III subunit VII [Source:NCBI gene;Acc:416336]	13	17774734	17777062	protein_coding	1	UQCRQ	UQCRQ
ENSGALG00000006198	-0.568051	5.90678	2.64264	0.104031	0.807318	ENSGALG00000006198	ENSGALG00000006198.7	LSS	lanosterol synthase [Source:NCBI gene;Acc:424037]	7	6913221	6923292	protein_coding	-1		LSS
ENSGALG00000020322	0.417612	5.67969	2.6424	0.104046	0.807318	ENSGALG00000020322	ENSGALG00000020322.5		acidic repeat containing [Source:NCBI gene;Acc:422202]	4	2191580	2199755	protein_coding	-1		ACRC
ENSGALG00000040594	-0.441882	6.0957	2.64068	0.104159	0.807362	ENSGALG00000040594	ENSGALG00000040594.3	GNPDA1	glucosamine-6-phosphate deaminase 1 [Source:NCBI gene;Acc:416341]	13	17876802	17881810	protein_coding	-1		GNPDA1
ENSGALG00000035131	1.03251	1.38761	2.6398	0.104217	0.807362	ENSGALG00000035131	ENSGALG00000035131.2		claudin 9 [Source:NCBI gene;Acc:417474]	19	859638	866958	protein_coding	1		CLDN9
ENSGALG00000017183	-0.591383	8.84956	2.63928	0.104251	0.807362	ENSGALG00000017183	ENSGALG00000017183.6	MMP13	matrix metallopeptidase 13 [Source:NCBI gene;Acc:395683]	1	183730975	183738566	protein_coding	1		MMP13
ENSGALG00000054070	0.725174	3.03904	2.63253	0.104695	0.809798	ENSGALG00000054070	ENSGALG00000054070.1		class I histocompatibility antigen, F10 alpha chain-like [Source:NCBI gene;Acc:100859100]	KZ626819.1	50569	123604	protein_coding	1		LOC100859100
ENSGALG00000002705	0.50422	4.99723	2.63248	0.104698	0.809798	ENSGALG00000002705	ENSGALG00000002705.7	CISD1	CDGSH iron sulfur domain 1 [Source:NCBI gene;Acc:423642]	6	5951613	5961190	protein_coding	1		CISD1
ENSGALG00000018700	0.69905	1.38221	2.62933	0.104906	0.810728	ENSGALG00000018700	ENSGALG00000018700.5	PLPP7	phospholipid phosphatase 7 (inactive) [Source:NCBI gene;Acc:417178]	17	6447598	6458124	protein_coding	1	PLPP7	PLPP7
ENSGALG00000043381	0.746941	0.6593	2.62864	0.104951	0.810728	ENSGALG00000043381	ENSGALG00000043381.3		C-RF amide [Source:NCBI gene;Acc:420716]	2	43931993	43936917	protein_coding	1		LOC420716
ENSGALG00000011990	-0.574976	4.155	2.62706	0.105056	0.811022	ENSGALG00000011990	ENSGALG00000011990.5	USP53	ubiquitin specific peptidase 53 [Source:HGNC Symbol;Acc:HGNC:29255]	4	54729233	54752851	protein_coding	-1	USP53
ENSGALG00000031380	-0.466933	3.71166	2.62599	0.105127	0.81103	ENSGALG00000031380	ENSGALG00000031380.2	DENND3	DENN domain containing 3 [Source:NCBI gene;Acc:420309]	2	145987868	146024793	protein_coding	1	DENND3	DENND3
ENSGALG00000007350	-0.38072	5.36226	2.62503	0.10519	0.81103	ENSGALG00000007350	ENSGALG00000007350.7		thioredoxin related transmembrane protein 2 [Source:NCBI gene;Acc:428853]	5	17227428	17229764	protein_coding	-1		TMX2
ENSGALG00000026862	1.33486	1.89672	2.62339	0.105299	0.811355	ENSGALG00000026862	ENSGALG00000026862.4	CLDN1	claudin 1 [Source:NCBI gene;Acc:424910]	9	14097822	14108342	protein_coding	1		CLDN1
ENSGALG00000007793	-0.401356	5.33214	2.62178	0.105406	0.811669	ENSGALG00000007793	ENSGALG00000007793.5	UPRT	uracil phosphoribosyltransferase homolog [Source:NCBI gene;Acc:422327]	4	12557477	12569502	protein_coding	1		UPRT
ENSGALG00000021688	0.432999	3.86309	2.62061	0.105484	0.811752	ENSGALG00000021688	ENSGALG00000021688.5	CD320	CD320 molecule [Source:NCBI gene;Acc:420066]	28	985592	989803	protein_coding	1		CD320
ENSGALG00000041298	0.46483	3.84012	2.61865	0.105615	0.812245	ENSGALG00000041298	ENSGALG00000041298.2		integrin, alpha D [Source:NCBI gene;Acc:101748640]	14	15396046	15412161	protein_coding	1		ITGAD
ENSGALG00000052769	-0.739248	3.03341	2.61598	0.105792	0.812964	ENSGALG00000052769	ENSGALG00000052769.1			8	2687613	2689627	protein_coding	-1
ENSGALG00000049699	-0.918564	0.652385	2.61441	0.105897	0.812964	ENSGALG00000049699	ENSGALG00000049699.1			14	7229067	7239636	lncRNA	1
ENSGALG00000037558	-1.20889	2.34055	2.61328	0.105972	0.812964	ENSGALG00000037558	ENSGALG00000037558.2	MEF2B	myocyte enhancer factor 2B [Source:NCBI gene;Acc:426373]	28	3688008	3697772	protein_coding	1	MEF2B	MEF2B
ENSGALG00000034187	-0.384565	5.64456	2.61249	0.106025	0.812964	ENSGALG00000034187	ENSGALG00000034187.2	SEPTIN8	septin 8 [Source:NCBI gene;Acc:416333]	13	17685799	17723558	protein_coding	-1		SEPTIN8
ENSGALG00000007928	0.414902	4.91563	2.61224	0.106042	0.812964	ENSGALG00000007928	ENSGALG00000007928.6	MLLT10	myeloid/lymphoid or mixed-lineage leukemia; translocated to, 10 [Source:NCBI gene;Acc:420509]	2	17920466	18034491	protein_coding	-1	MLLT10	MLLT10
ENSGALG00000001758	-0.460727	5.60618	2.60684	0.106404	0.814661	ENSGALG00000001758	ENSGALG00000001758.6	QSOX2	quiescin sulfhydryl oxidase 2 [Source:NCBI gene;Acc:417129]	17	8319880	8338842	protein_coding	1	QSOX2	QSOX2
ENSGALG00000017327	0.726262	3.32608	2.60649	0.106427	0.814661	ENSGALG00000017327	ENSGALG00000017327.4	P2RY6	pyrimidinergic receptor P2Y6 [Source:NCBI gene;Acc:396114]	1	196442816	196449067	protein_coding	-1		P2RY6
ENSGALG00000005065	0.605049	3.43702	2.60533	0.106505	0.814661	ENSGALG00000005065	ENSGALG00000005065.5	PLA2G4A	phospholipase A2 group IVA [Source:NCBI gene;Acc:396394]	8	10608778	10684950	protein_coding	-1		PLA2G4A
ENSGALG00000005867	0.568317	3.67006	2.60495	0.106531	0.814661	ENSGALG00000005867	ENSGALG00000005867.6	MARCH8	membrane associated ring-CH-type finger 8 [Source:NCBI gene;Acc:423770]	6	18496927	18582316	protein_coding	-1		MARCH8
ENSGALG00000030781	0.984046	8.78982	2.60228	0.10671	0.815525	ENSGALG00000030781	ENSGALG00000030781.3	CA2	carbonic anhydrase 2 [Source:NCBI gene;Acc:396257]	2	122766240	122822370	protein_coding	1		CA2
ENSGALG00000010219	0.420403	4.1983	2.59735	0.107043	0.817316	ENSGALG00000010219	ENSGALG00000010219.6	UROD	uroporphyrinogen decarboxylase [Source:NCBI gene;Acc:424590]	8	21290142	21295998	protein_coding	1	UROD	UROD
ENSGALG00000007059	0.804911	1.86688	2.59681	0.107079	0.817316	ENSGALG00000007059	ENSGALG00000007059.5	IGSF6	immunoglobulin superfamily member 6 [Source:NCBI gene;Acc:771906]	14	9142666	9148845	protein_coding	-1		IGSF6
ENSGALG00000040840	-0.432101	5.41914	2.59377	0.107284	0.817838	ENSGALG00000040840	ENSGALG00000040840.3	MPST	mercaptopyruvate sulfurtransferase [Source:NCBI gene;Acc:418048]	1	51508596	51511452	protein_coding	-1		MPST
ENSGALG00000014933	-0.553922	6.78182	2.59286	0.107346	0.817838	ENSGALG00000014933	ENSGALG00000014933.7	HEXB	hexosaminidase subunit beta [Source:NCBI gene;Acc:427204]	Z	24225243	24240761	protein_coding	-1	HEXB	HEXB
ENSGALG00000047461	-0.452443	6.02832	2.5923	0.107384	0.817838	ENSGALG00000047461	ENSGALG00000047461.1		aspartate beta-hydroxylase [Source:NCBI gene;Acc:421142]	2	113330950	113386231	protein_coding	-1		ASPH
ENSGALG00000002728	-0.543472	7.16581	2.59122	0.107458	0.817838	ENSGALG00000002728	ENSGALG00000002728.4	SLC16A3	solute carrier family 16 member 3 [Source:NCBI gene;Acc:395383]	18	4866126	4876014	protein_coding	-1		SLC16A3
ENSGALG00000013804	-0.469875	3.96205	2.59084	0.107483	0.817838	ENSGALG00000013804	ENSGALG00000013804.7	SRD5A3	steroid 5 alpha-reductase 3 [Source:NCBI gene;Acc:422750]	4	65129662	65135891	protein_coding	-1	SRD5A3	SRD5A3
ENSGALG00000009549	0.427364	6.72659	2.58686	0.107754	0.819056	ENSGALG00000009549	ENSGALG00000009549.4	KPNA4	karyopherin subunit alpha 4 [Source:NCBI gene;Acc:425012]	9	22276441	22299523	protein_coding	1		KPNA4
ENSGALG00000041494	-0.443339	6.91512	2.58651	0.107778	0.819056	ENSGALG00000041494	ENSGALG00000041494.2	GOLGB1	golgin B1 [Source:NCBI gene;Acc:426868]	1	323123	357594	protein_coding	1	GOLGB1	GOLGB1
ENSGALG00000041564	-0.39088	4.44702	2.58311	0.108009	0.820081	ENSGALG00000041564	ENSGALG00000041564.2		mannosidase alpha class 1A member 2 [Source:NCBI gene;Acc:418265]	1	77147561	77281468	protein_coding	-1		MAN1A2
ENSGALG00000026468	-0.464525	5.90686	2.58256	0.108047	0.820081	ENSGALG00000026468	ENSGALG00000026468.3	CHSY1	chondroitin sulfate synthase 1 [Source:NCBI gene;Acc:415521]	10	17984884	18044858	protein_coding	-1	CHSY1	CHSY1
ENSGALG00000009130	0.46954	5.36647	2.58063	0.108178	0.820565	ENSGALG00000009130	ENSGALG00000009130.6	GPCPD1	glycerophosphocholine phosphodiesterase 1 [Source:NCBI gene;Acc:421311]	3	16861604	16894451	protein_coding	-1		GPCPD1
ENSGALG00000044213	0.374354	4.95179	2.57946	0.108259	0.820664	ENSGALG00000044213	ENSGALG00000044213.2	METTL3	methyltransferase like 3 [Source:NCBI gene;Acc:107050363]	31	2473736	2495431	protein_coding	1	METTL3	METTL3
ENSGALG00000030607	-0.517349	7.65386	2.5775	0.108393	0.820981	ENSGALG00000030607	ENSGALG00000030607.2	CHST11	carbohydrate sulfotransferase 11 [Source:HGNC Symbol;Acc:HGNC:17422]	1	54386968	54542011	protein_coding	-1	CHST11
ENSGALG00000010579	-1.21524	1.56759	2.57609	0.108489	0.820981	ENSGALG00000010579	ENSGALG00000010579.6	STON2	stonin 2 [Source:NCBI gene;Acc:423390]	5	41075417	41130702	protein_coding	-1	STON2	STON2
ENSGALG00000010769	0.805201	3.19939	2.57549	0.10853	0.820981	ENSGALG00000010769	ENSGALG00000010769.6	HPGD	hydroxyprostaglandin dehydrogenase 15-(NAD) [Source:NCBI gene;Acc:422567]	4	43759687	43785536	protein_coding	-1		HPGD
ENSGALG00000013583	-0.474427	7.517	2.57491	0.10857	0.820981	ENSGALG00000013583	ENSGALG00000013583.6	FAM114A1	family with sequence similarity 114 member A1 [Source:NCBI gene;Acc:426196]	4	69474903	69506031	protein_coding	-1		FAM114A1
ENSGALG00000036214	-0.410776	6.04003	2.57298	0.108703	0.821343	ENSGALG00000036214	ENSGALG00000036214.3	PARK7	Parkinson disease (autosomal recessive, early onset) 7 [Source:NCBI gene;Acc:395277]	21	264289	271465	protein_coding	-1		PARK7
ENSGALG00000042418	-0.632972	2.18528	2.57225	0.108753	0.821343	ENSGALG00000042418	ENSGALG00000042418.2	CHEK1	checkpoint kinase 1 [Source:NCBI gene;Acc:374260]	24	406480	410226	pseudogene	-1		CHEK1
ENSGALG00000029360	-0.433754	6.05451	2.56122	0.109514	0.826578	ENSGALG00000029360	ENSGALG00000029360.2		pM5 protein [Source:NCBI gene;Acc:416602]	14	8116712	8141697	protein_coding	1		PM5
ENSGALG00000016461	-0.398224	6.78658	2.55985	0.109609	0.826786	ENSGALG00000016461	ENSGALG00000016461.6	DDX1	DEAD-box helicase 1 [Source:NCBI gene;Acc:395249]	3	98936284	98957643	protein_coding	1		DDX1
ENSGALG00000014485	0.432768	4.88349	2.5577	0.109758	0.827396	ENSGALG00000014485	ENSGALG00000014485.6	LDB2	LIM domain binding 2 [Source:NCBI gene;Acc:395631]	4	76025150	76382215	protein_coding	1		LDB2
ENSGALG00000005377	-0.519281	3.14823	2.55096	0.110227	0.829168	ENSGALG00000005377	ENSGALG00000005377.6	WWOX	WW domain containing oxidoreductase [Source:NCBI gene;Acc:415801]	11	14060228	14531588	protein_coding	1		WWOX
ENSGALG00000010878	-0.430708	7.14488	2.55062	0.110251	0.829168	ENSGALG00000010878	ENSGALG00000010878.5	USO1	USO1 vesicle transport factor [Source:NCBI gene;Acc:422575]	4	44783153	44809209	protein_coding	-1		USO1
ENSGALG00000010347	0.467889	6.01787	2.54844	0.110403	0.829168	ENSGALG00000010347	ENSGALG00000010347.6	CCNG2	cyclin G2 [Source:NCBI gene;Acc:422512]	4	35013347	35018533	protein_coding	-1	CCNG2	CCNG2
ENSGALG00000023303	-0.735051	5.24081	2.54821	0.110419	0.829168	ENSGALG00000023303	ENSGALG00000023303.4	SIX2	SIX homeobox 2 [Source:NCBI gene;Acc:724086]	3	26002837	26005896	protein_coding	-1		SIX2
ENSGALG00000014923	-0.449222	5.19607	2.54794	0.110438	0.829168	ENSGALG00000014923	ENSGALG00000014923.6	ARHGEF28	Rho guanine nucleotide exchange factor 28 [Source:NCBI gene;Acc:427201]	Z	24570156	24702274	protein_coding	-1	ARHGEF28	ARHGEF28
ENSGALG00000042339	-0.827092	2.52438	2.54635	0.11055	0.829168	ENSGALG00000042339	ENSGALG00000042339.2			1	175449309	175545587	protein_coding	1
ENSGALG00000040026	-0.747373	0.687486	2.54482	0.110656	0.829168	ENSGALG00000040026	ENSGALG00000040026.3			5	53031545	53041637	protein_coding	-1
ENSGALG00000002358	-0.458998	6.65002	2.54412	0.110706	0.829168	ENSGALG00000002358	ENSGALG00000002358.6	CDO1	cysteine dioxygenase type 1 [Source:NCBI gene;Acc:427391]	Z	73146956	73156876	protein_coding	1	CDO1	CDO1
ENSGALG00000027069	0.45478	6.47034	2.54362	0.110741	0.829168	ENSGALG00000027069	ENSGALG00000027069.3	TSC22D4	TSC22 domain family member 4 [Source:NCBI gene;Acc:768091]	4	1786951	1794312	protein_coding	1		TSC22D4
ENSGALG00000011581	-0.783638	5.36071	2.5433	0.110763	0.829168	ENSGALG00000011581	ENSGALG00000011581.6	KIF26A	kinesin family member 26A [Source:NCBI gene;Acc:423489]	5	50931834	50997535	protein_coding	1	KIF26A	KIF26A
ENSGALG00000034549	0.422717	3.93774	2.54323	0.110768	0.829168	ENSGALG00000034549	ENSGALG00000034549.3			10	8188331	8216127	lncRNA	-1
ENSGALG00000005985	-0.80677	4.41268	2.5426	0.110812	0.829168	ENSGALG00000005985	ENSGALG00000005985.7	GDF10	growth differentiation factor 10 [Source:HGNC Symbol;Acc:HGNC:4215]	6	18850965	18862872	protein_coding	-1	GDF10
ENSGALG00000016759	0.541003	3.19855	2.54166	0.110878	0.829168	ENSGALG00000016759	ENSGALG00000016759.6	MITD1	microtubule interacting and trafficking domain containing 1 [Source:NCBI gene;Acc:418698]	1	133809550	133813733	protein_coding	-1	MITD1	MITD1
ENSGALG00000034829	-0.407775	6.21603	2.54008	0.110989	0.829493	ENSGALG00000034829	ENSGALG00000034829.3	PDXDC1	pyridoxal dependent decarboxylase domain containing 1 [Source:NCBI gene;Acc:416413]	14	449210	477081	protein_coding	1	PDXDC1	PDXDC1
ENSGALG00000051505	-0.615149	2.72817	2.53882	0.111078	0.829646	ENSGALG00000051505	ENSGALG00000051505.1	ZNF503	zinc finger protein 503 [Source:NCBI gene;Acc:770136]	6	15415982	15419961	protein_coding	1	ZNF503	ZNF503
ENSGALG00000052471	-0.408334	5.33812	2.53612	0.111268	0.830203	ENSGALG00000052471	ENSGALG00000052471.1	MRPS21	mitochondrial ribosomal protein S21 [Source:NCBI gene;Acc:426666]	25	3739529	3742749	protein_coding	-1		MRPS21
ENSGALG00000049119	0.389035	5.46803	2.53542	0.111318	0.830203	ENSGALG00000049119	ENSGALG00000049119.1	ZNF638	zinc finger protein 638 [Source:NCBI gene;Acc:395593]	4	91173719	91216430	protein_coding	-1	ZNF638	ZNF638
ENSGALG00000004637	0.421158	5.5721	2.53486	0.111357	0.830203	ENSGALG00000004637	ENSGALG00000004637.7		sedoheptulokinase [Source:NCBI gene;Acc:417607]	19	6800175	6808318	protein_coding	1		SHPK
ENSGALG00000030776	0.780011	2.04448	2.53223	0.111543	0.831079	ENSGALG00000030776	ENSGALG00000030776.2	METTL7A	methyltransferase like 7A [Source:NCBI gene;Acc:426871]	33	3166725	3168701	protein_coding	-1	METTL7A	METTL7A
ENSGALG00000032841	0.725239	2.71702	2.52902	0.11177	0.832014	ENSGALG00000032841	ENSGALG00000032841.3			2	94650692	94652536	lncRNA	1
ENSGALG00000033083	0.594432	2.13197	2.52852	0.111805	0.832014	ENSGALG00000033083	ENSGALG00000033083.2	ATOH8	atonal bHLH transcription factor 8 [Source:NCBI gene;Acc:771738]	4	85314167	85334055	protein_coding	1		ATOH8
ENSGALG00000010847	0.650246	2.57268	2.52418	0.112113	0.833798	ENSGALG00000010847	ENSGALG00000010847.5	VEGFC	vascular endothelial growth factor C [Source:NCBI gene;Acc:422573]	4	44468359	44536888	protein_coding	-1	VEGFC	VEGFC
ENSGALG00000030759	-0.4787	8.25888	2.52308	0.112191	0.83387	ENSGALG00000030759	ENSGALG00000030759.2	SRPRA	SRP receptor alpha subunit [Source:NCBI gene;Acc:419713]	24	428137	437185	protein_coding	1		SRPRA
ENSGALG00000014841	-0.369407	4.84857	2.52136	0.112314	0.834273	ENSGALG00000014841	ENSGALG00000014841.7	HDDC2	HD domain containing 2 [Source:NCBI gene;Acc:421719]	3	60103490	60136557	protein_coding	1		HDDC2
ENSGALG00000051085	-0.659371	5.31984	2.51581	0.11271	0.836705	ENSGALG00000051085	ENSGALG00000051085.1			3	87262144	87301693	protein_coding	1
ENSGALG00000010853	-1.0999	1.37993	2.51457	0.112798	0.836849	ENSGALG00000010853	ENSGALG00000010853.7	C8B	complement C8 beta chain [Source:NCBI gene;Acc:424669]	8	26178921	26194902	protein_coding	-1		C8B
ENSGALG00000021598	-0.673495	2.6817	2.51214	0.112972	0.837122	ENSGALG00000021598	ENSGALG00000021598.5		arylacetamide deacetylase like 3C [Source:NCBI gene;Acc:419479]	21	5258905	5263537	protein_coding	-1		AADACL3C
ENSGALG00000007651	0.532298	7.06886	2.51214	0.112972	0.837122	ENSGALG00000007651	ENSGALG00000007651.7	STAT1	signal transducer and activator of transcription 1 [Source:NCBI gene;Acc:424044]	7	7912708	7932691	protein_coding	-1		STAT1
ENSGALG00000010601	-0.371198	4.96843	2.51032	0.113103	0.83758	ENSGALG00000010601	ENSGALG00000010601.6	UFSP2	UFM1 specific peptidase 2 [Source:NCBI gene;Acc:422542]	4	39244685	39256258	protein_coding	1		UFSP2
ENSGALG00000014688	0.4382	6.46459	2.50647	0.11338	0.839122	ENSGALG00000014688	ENSGALG00000014688.4	ZYX	zyxin [Source:NCBI gene;Acc:418300]	1	78201045	78212460	protein_coding	-1		ZYX
ENSGALG00000034163	-0.554412	8.7426	2.50479	0.113501	0.839504	ENSGALG00000034163	ENSGALG00000034163.3	CRTAP	cartilage associated protein [Source:NCBI gene;Acc:395992]	2	44415479	44436885	protein_coding	1		CRTAP
ENSGALG00000001605	-0.708276	2.39675	2.49973	0.113866	0.841491	ENSGALG00000001605	ENSGALG00000001605.8	PPM1J	protein phosphatase, Mg2+/Mn2+ dependent 1J [Source:NCBI gene;Acc:419873]	26	3558395	3564832	protein_coding	-1	PPM1J	PPM1J
ENSGALG00000031741	-0.437153	6.98533	2.49916	0.113907	0.841491	ENSGALG00000031741	ENSGALG00000031741.3	PTK2	protein tyrosine kinase 2 [Source:NCBI gene;Acc:396416]	2	145702024	145887400	protein_coding	-1		PTK2
ENSGALG00000032534	0.728927	1.88736	2.49766	0.114015	0.841778	ENSGALG00000032534	ENSGALG00000032534.3		obscurin, cytoskeletal calmodulin and titin-interacting RhoGEF [Source:NCBI gene;Acc:420395]	2	2173497	2346313	pseudogene	-1		OBSCN
ENSGALG00000051779	-0.386782	5.45428	2.49382	0.114294	0.84234	ENSGALG00000051779	ENSGALG00000051779.1	PRORSD1P	prolyl-tRNA synthetase associated domain containing 1, pseudogene [Source:NCBI gene;Acc:421212]	3	88895	91751	protein_coding	1		PRORSD1P
ENSGALG00000036935	-0.417125	4.13701	2.49346	0.11432	0.84234	ENSGALG00000036935	ENSGALG00000036935.2		membrane-spanning 4-domains subfamily A member 12-like [Source:NCBI gene;Acc:107056412]	5	258436	260326	protein_coding	1		LOC107056412
ENSGALG00000035935	-0.52359	4.9479	2.49207	0.114421	0.84234	ENSGALG00000035935	ENSGALG00000035935.2		unc-13 homolog C [Source:NCBI gene;Acc:415413]	10	8592962	8676758	protein_coding	-1		UNC13C
ENSGALG00000016292	-0.674006	4.28699	2.49121	0.114484	0.84234	ENSGALG00000016292	ENSGALG00000016292.7			3	87199659	87241935	protein_coding	1
ENSGALG00000032997	0.746332	6.31815	2.49112	0.11449	0.84234	ENSGALG00000032997	ENSGALG00000032997.2	EMILIN2	elastin microfibril interfacer 2 [Source:NCBI gene;Acc:421058]	2	101038793	101069808	protein_coding	-1	EMILIN2	EMILIN2
ENSGALG00000032335	0.541122	4.82208	2.4909	0.114506	0.84234	ENSGALG00000032335	ENSGALG00000032335.2	MARCKSL1	MARCKS like 1 [Source:NCBI gene;Acc:770764]	23	5269045	5270797	protein_coding	1		MARCKSL1
ENSGALG00000053575	0.442177	3.67487	2.4889	0.114652	0.842904	ENSGALG00000053575	ENSGALG00000053575.1	DAZAP2	DAZ associated protein 2 [Source:NCBI gene;Acc:107051549]	33	5023150	5027892	protein_coding	1	DAZAP2	DAZAP2
ENSGALG00000029679	0.665031	0.938359	2.48753	0.114751	0.842954	ENSGALG00000029679	ENSGALG00000029679.3	PLEKHA7	pleckstrin homology domain containing A7 [Source:NCBI gene;Acc:423069]	5	11778632	11840720	protein_coding	-1	PLEKHA7	PLEKHA7
ENSGALG00000040620	-0.526096	4.61081	2.48579	0.114878	0.842954	ENSGALG00000040620	ENSGALG00000040620.3	LSAMP	limbic system-associated membrane protein [Source:NCBI gene;Acc:395687]	1	82041116	83002376	protein_coding	1		LSAMP
ENSGALG00000039964	0.707661	3.80176	2.48407	0.115005	0.842954	ENSGALG00000039964	ENSGALG00000039964.2		kinesin-like protein KIFC1-like [Source:NCBI gene;Acc:101748559]	16	2333312	2337847	pseudogene	1		KIFC1L
ENSGALG00000005360	-0.611934	4.39557	2.48378	0.115025	0.842954	ENSGALG00000005360	ENSGALG00000005360.6	CA4	carbonic anhydrase 4 [Source:NCBI gene;Acc:417647]	19	8243835	8262292	protein_coding	-1	CA4	CA4
ENSGALG00000000086	-0.387944	5.67957	2.48377	0.115026	0.842954	ENSGALG00000000086	ENSGALG00000000086.4	TIMM17B	translocase of inner mitochondrial membrane 17 homolog B (yeast) [Source:NCBI gene;Acc:421147]	26	1113674	1120743	protein_coding	-1		TIMM17B
ENSGALG00000046464	0.385325	4.47828	2.48312	0.115074	0.842954	ENSGALG00000046464	ENSGALG00000046464.2	RUSC1	RUN and SH3 domain containing 1 [Source:NCBI gene;Acc:425062]	25	3553892	3559408	protein_coding	1	RUSC1	RUSC1
ENSGALG00000002012	0.443502	4.9811	2.48143	0.115197	0.843026	ENSGALG00000002012	ENSGALG00000002012.7			6	3313775	3317807	protein_coding	-1
ENSGALG00000016845	-0.411082	5.19436	2.48109	0.115222	0.843026	ENSGALG00000016845	ENSGALG00000016845.6	NAXD	NAD(P)HX dehydratase [Source:NCBI gene;Acc:418755]	1	140453799	140504526	protein_coding	1	NAXD	NAXD
ENSGALG00000007052	0.452856	4.20143	2.47794	0.115453	0.843741	ENSGALG00000007052	ENSGALG00000007052.6	PXK	PX domain containing serine/threonine kinase like [Source:NCBI gene;Acc:416065]	12	12191823	12223412	protein_coding	1	PXK	PXK
ENSGALG00000009002	-0.427138	4.52682	2.47754	0.115483	0.843741	ENSGALG00000009002	ENSGALG00000009002.6	CPED1	cadherin-like and PC-esterase domain containing 1 [Source:NCBI gene;Acc:417761]	1	23415784	23554158	protein_coding	-1	CPED1	CPED1
ENSGALG00000008049	-0.426779	4.27406	2.47628	0.115575	0.843741	ENSGALG00000008049	ENSGALG00000008049.6	ARL3	ADP ribosylation factor like GTPase 3 [Source:NCBI gene;Acc:423865]	6	24257821	24283161	protein_coding	-1	ARL3	ARL3
ENSGALG00000037553	-0.37286	5.85325	2.47598	0.115597	0.843741	ENSGALG00000037553	ENSGALG00000037553.3	SEC11A	SEC11 homolog A, signal peptidase complex subunit [Source:NCBI gene;Acc:415334]	10	1456985	1466170	protein_coding	1		SEC11A
ENSGALG00000002598	-0.459272	7.22165	2.47454	0.115704	0.844012	ENSGALG00000002598	ENSGALG00000002598.7	TPST1	tyrosylprotein sulfotransferase 1 [Source:NCBI gene;Acc:417546]	19	5111091	5168955	protein_coding	1	TPST1	TPST1
ENSGALG00000039356	-0.751712	4.73155	2.47018	0.116024	0.844207	ENSGALG00000039356	ENSGALG00000039356.2	HEPACAM	hepatic and glial cell adhesion molecule [Source:NCBI gene;Acc:428234]	24	269631	274676	protein_coding	1	HEPACAM	HEPACAM
ENSGALG00000016785	-0.743999	7.10945	2.47006	0.116034	0.844207	ENSGALG00000016785	ENSGALG00000016785.6	IL1RL1	interleukin 1 receptor like 1 [Source:NCBI gene;Acc:374136]	1	135176642	135199850	protein_coding	1		IL1RL1
ENSGALG00000001439	0.526017	3.97143	2.46978	0.116054	0.844207	ENSGALG00000001439	ENSGALG00000001439.6	RANBP10	RAN binding protein 10 [Source:NCBI gene;Acc:415653]	11	793917	847606	protein_coding	-1	RANBP10	RANBP10
ENSGALG00000037375	-0.376349	5.90064	2.46949	0.116076	0.844207	ENSGALG00000037375	ENSGALG00000037375.2	MAN1B1	mannosidase alpha class 1B member 1 [Source:NCBI gene;Acc:417296]	17	695350	714591	protein_coding	-1	MAN1B1	MAN1B1
ENSGALG00000042079	-0.41599	6.60456	2.46896	0.116115	0.844207	ENSGALG00000042079	ENSGALG00000042079.3	NID1	nidogen 1 [Source:NCBI gene;Acc:395531]	3	37941890	37973181	protein_coding	1	NID1	NID1
ENSGALG00000032400	-0.474611	3.29435	2.46817	0.116173	0.844207	ENSGALG00000032400	ENSGALG00000032400.2	UTP23	UTP23, small subunit processome component [Source:NCBI gene;Acc:420287]	2	135510776	135515223	protein_coding	1	UTP23	UTP23
ENSGALG00000009179	0.516963	5.6466	2.46714	0.116249	0.844207	ENSGALG00000009179	ENSGALG00000009179.6	TNFSF10	tumor necrosis factor superfamily member 10 [Source:NCBI gene;Acc:378894]	9	19447018	19455676	protein_coding	1		TNFSF10
ENSGALG00000049279	0.664489	0.867092	2.46575	0.116352	0.844207	ENSGALG00000049279	ENSGALG00000049279.1			5	55276966	55285880	lncRNA	-1
ENSGALG00000012196	0.502103	4.43923	2.46573	0.116354	0.844207	ENSGALG00000012196	ENSGALG00000012196.7	MCUB	mitochondrial calcium uniporter dominant negative beta subunit [Source:NCBI gene;Acc:422698]	4	58154371	58188683	protein_coding	-1	MCUB	MCUB
ENSGALG00000037863	-0.497209	6.61021	2.46259	0.116586	0.845391	ENSGALG00000037863	ENSGALG00000037863.3	SEC61G	Sec61 translocon gamma subunit [Source:NCBI gene;Acc:776639]	2	52114901	52118653	protein_coding	1		SEC61G
ENSGALG00000008623	0.519163	3.03595	2.45956	0.116812	0.845606	ENSGALG00000008623	ENSGALG00000008623.7	TOR4A	torsin family 4 member A [Source:NCBI gene;Acc:417257]	17	2166268	2170923	protein_coding	1	TOR4A	TOR4A
ENSGALG00000002864	-1.11581	0.646737	2.45844	0.116895	0.845606	ENSGALG00000002864	ENSGALG00000002864.6	LRRTM3	leucine rich repeat transmembrane neuronal 3 [Source:NCBI gene;Acc:423649]	6	7492006	7573415	protein_coding	-1		LRRTM3
ENSGALG00000032349	0.524578	6.19577	2.4581	0.11692	0.845606	ENSGALG00000032349	ENSGALG00000032349.2	CDH5	cadherin 5 [Source:NCBI gene;Acc:374068]	11	11518646	11547898	protein_coding	-1		CDH5
ENSGALG00000012056	0.833298	0.808363	2.45606	0.117072	0.845606	ENSGALG00000012056	ENSGALG00000012056.6	GRAP2	GRB2-related adaptor protein 2 [Source:NCBI gene;Acc:770756]	1	50298523	50339266	protein_coding	-1	GRAP2	GRAP2
ENSGALG00000053491	0.711584	0.827315	2.45549	0.117114	0.845606	ENSGALG00000053491	ENSGALG00000053491.1			4	29938106	29951638	lncRNA	-1
ENSGALG00000026303	0.450097	4.91637	2.45263	0.117328	0.845606	ENSGALG00000026303	ENSGALG00000026303.4	MRPS2	mitochondrial ribosomal protein S2 [Source:NCBI gene;Acc:417140]	17	8018445	8020171	protein_coding	1	MRPS2	MRPS2
ENSGALG00000041640	0.567349	3.25955	2.45062	0.117478	0.845606	ENSGALG00000041640	ENSGALG00000041640.3	TWIST1	twist family bHLH transcription factor 1 [Source:NCBI gene;Acc:395491]	2	29565482	29567600	protein_coding	-1		TWIST1
ENSGALG00000047690	-0.654979	1.28521	2.45045	0.117491	0.845606	ENSGALG00000047690	ENSGALG00000047690.1			14	4950697	4952555	lncRNA	1
ENSGALG00000054939	-0.539771	4.86205	2.44905	0.117596	0.845606	ENSGALG00000054939	ENSGALG00000054939.1	RAPH1	Ras association (RalGDS/AF-6) and pleckstrin homology domains 1 [Source:NCBI gene;Acc:424107]	7	13545067	13589651	protein_coding	1	RAPH1	RAPH1
ENSGALG00000014477	0.731171	0.635908	2.44861	0.117629	0.845606	ENSGALG00000014477	ENSGALG00000014477.6	CD4	CD4 molecule [Source:NCBI gene;Acc:395362]	1	77873930	77885897	protein_coding	1		CD4
ENSGALG00000026383	0.67175	9.12203	2.44816	0.117662	0.845606	ENSGALG00000026383	ENSGALG00000026383.3	TMSB4X	thymosin beta 4, X-linked [Source:NCBI gene;Acc:408047]	1	124544398	124546072	protein_coding	1		TMSB4X
ENSGALG00000010005	0.521054	7.03745	2.44793	0.11768	0.845606	ENSGALG00000010005	ENSGALG00000010005.6	EPAS1	endothelial PAS domain protein 1 [Source:NCBI gene;Acc:395596]	3	26671415	26746226	protein_coding	1		EPAS1
ENSGALG00000054106	0.437829	3.82724	2.44735	0.117724	0.845606	ENSGALG00000054106	ENSGALG00000054106.1		protein capicua homolog [Source:NCBI gene;Acc:107050718]	KZ626826.1	10731	15483	protein_coding	-1		LOC107050718
ENSGALG00000043025	-0.439026	5.46655	2.44735	0.117724	0.845606	ENSGALG00000043025	ENSGALG00000043025.3			5	725593	731173	protein_coding	-1
ENSGALG00000037525	-0.683515	8.29719	2.44238	0.118097	0.845606	ENSGALG00000037525	ENSGALG00000037525.2	FGFRL1	fibroblast growth factor receptor-like 1 [Source:NCBI gene;Acc:395107]	4	85064209	85229240	protein_coding	-1		FGFRL1
ENSGALG00000049533	0.454462	3.81076	2.44226	0.118106	0.845606	ENSGALG00000049533	ENSGALG00000049533.1		ryanodine receptor 1-like [Source:NCBI gene;Acc:101748756]	32	7402	57402	pseudogene	1		LOC101748756
ENSGALG00000034725	0.369138	5.8551	2.4419	0.118133	0.845606	ENSGALG00000034725	ENSGALG00000034725.2		bromodomain containing 4 [Source:NCBI gene;Acc:100859056]	30	504317	527127	protein_coding	1		BRD4
ENSGALG00000027641	-0.378981	6.16316	2.44163	0.118153	0.845606	ENSGALG00000027641	ENSGALG00000027641.3	DUSP14	dual specificity phosphatase 14 [Source:NCBI gene;Acc:417657]	19	8728278	8740918	protein_coding	1	DUSP14	DUSP14
ENSGALG00000010789	-0.536354	2.76324	2.44031	0.118253	0.845606	ENSGALG00000010789	ENSGALG00000010789.6	PARS2	prolyl-tRNA synthetase 2, mitochondrial (putative) [Source:NCBI gene;Acc:424659]	8	25599268	25601076	protein_coding	-1		PARS2
ENSGALG00000037852	-0.423016	4.44922	2.43978	0.118293	0.845606	ENSGALG00000037852	ENSGALG00000037852.3	HSD17B7	hydroxysteroid 17-beta dehydrogenase 7 [Source:NCBI gene;Acc:424367]	8	4187219	4193131	protein_coding	-1		HSD17B7
ENSGALG00000006441	-0.346419	4.84394	2.43966	0.118302	0.845606	ENSGALG00000006441	ENSGALG00000006441.6	GNPTG	N-acetylglucosamine-1-phosphate transferase gamma subunit [Source:NCBI gene;Acc:416591]	14	7823897	7832947	protein_coding	1		GNPTG
ENSGALG00000049568	0.673307	0.400998	2.43935	0.118325	0.845606	ENSGALG00000049568	ENSGALG00000049568.1			3	27025403	27050819	lncRNA	1
ENSGALG00000037030	0.399303	5.27935	2.43927	0.118331	0.845606	ENSGALG00000037030	ENSGALG00000037030.3	CREBL2	cAMP responsive element binding protein like 2 [Source:NCBI gene;Acc:426496]	1	71960834	71970851	protein_coding	1		CREBL2
ENSGALG00000012187	-0.522062	6.39852	2.43844	0.118394	0.845606	ENSGALG00000012187	ENSGALG00000012187.6	MGAT5	alpha-1,6-mannosylglycoprotein 6-beta-N-acetylglucosaminyltransferase [Source:NCBI gene;Acc:424286]	7	30239783	30329855	protein_coding	1	MGAT5	MGAT5
ENSGALG00000005248	0.460173	3.73104	2.43815	0.118416	0.845606	ENSGALG00000005248	ENSGALG00000005248.6	CDC14A	cell division cycle 14A [Source:NCBI gene;Acc:424466]	8	12174912	12231784	protein_coding	1		CDC14A
ENSGALG00000043035	-0.508664	7.27826	2.43718	0.118489	0.845606	ENSGALG00000043035	ENSGALG00000043035.3	SHISA2	shisa family member 2 [Source:NCBI gene;Acc:395162]	1	178373699	178377553	protein_coding	-1		SHISA2
ENSGALG00000005253	-0.713312	10.1894	2.43716	0.11849	0.845606	ENSGALG00000005253	ENSGALG00000005253.6	C1QTNF8	C1q and tumor necrosis factor related protein 8 [Source:NCBI gene;Acc:427666]	14	5989615	5992223	protein_coding	1	C1QTNF8	C1QTNF8
ENSGALG00000006506	-0.464751	8.32135	2.4355	0.118616	0.84601	ENSGALG00000006506	ENSGALG00000006506.5	C13H5orf15	chromosome 13 C5orf15 homolog [Source:NCBI gene;Acc:416321]	13	16749773	16755766	protein_coding	1		C13H5orf15
ENSGALG00000002679	-0.572132	4.10528	2.4335	0.118768	0.84645	ENSGALG00000002679	ENSGALG00000002679.4	GLT1D1	glycosyltransferase 1 domain containing 1 [Source:NCBI gene;Acc:416807]	15	4008082	4050199	protein_coding	-1		GLT1D1
ENSGALG00000002066	0.52848	7.42511	2.43194	0.118886	0.84645	ENSGALG00000002066	ENSGALG00000002066.4	NCOA4	nuclear receptor coactivator 4 [Source:NCBI gene;Acc:423615]	6	3479797	3488573	protein_coding	1		NCOA4
ENSGALG00000045684	0.476953	7.00858	2.43155	0.118915	0.84645	ENSGALG00000045684	ENSGALG00000045684.2		plasmalemma vesicle associated protein [Source:NCBI gene;Acc:100857417]	28	3528771	3530950	protein_coding	-1		PLVAP
ENSGALG00000046550	0.481582	6.11935	2.43101	0.118956	0.84645	ENSGALG00000046550	ENSGALG00000046550.2			4	60182461	60231262	protein_coding	-1
ENSGALG00000043002	-0.402277	5.9197	2.42771	0.119207	0.847651	ENSGALG00000043002	ENSGALG00000043002.2	TOMM6	translocase of outer mitochondrial membrane 6 [Source:NCBI gene;Acc:419924]	26	4985093	4986115	protein_coding	1		TOMM6
ENSGALG00000007048	0.443232	6.16742	2.42428	0.119468	0.847651	ENSGALG00000007048	ENSGALG00000007048.7	SYNM	synemin [Source:NCBI gene;Acc:395599]	10	17303559	17324081	protein_coding	1		SYNM
ENSGALG00000015315	0.692582	1.52522	2.42261	0.119595	0.847651	ENSGALG00000015315	ENSGALG00000015315.6	TRIM14	tripartite motif containing 14 [Source:NCBI gene;Acc:427282]	Z	52089154	52096585	protein_coding	1		TRIM14
ENSGALG00000016377	-0.404547	6.87998	2.42252	0.119603	0.847651	ENSGALG00000016377	ENSGALG00000016377.6	PXDN	peroxidasin [Source:NCBI gene;Acc:421914]	3	92904139	92977622	protein_coding	-1	PXDN	PXDN
ENSGALG00000014182	0.962668	1.09298	2.42195	0.119646	0.847651	ENSGALG00000014182	ENSGALG00000014182.4	ADORA2B	adenosine A2b receptor [Source:NCBI gene;Acc:395971]	19	6587381	6595618	protein_coding	1		ADORA2B
ENSGALG00000044230	0.555869	2.80299	2.42188	0.119651	0.847651	ENSGALG00000044230	ENSGALG00000044230.2	ARHGAP27	Rho GTPase activating protein 27 [Source:NCBI gene;Acc:770740]	27	3988882	4003494	protein_coding	-1	ARHGAP27	ARHGAP27
ENSGALG00000043088	0.618803	2.81789	2.42173	0.119663	0.847651	ENSGALG00000043088	ENSGALG00000043088.2		roundabout guidance receptor 4 [Source:NCBI gene;Acc:107055040]	24	274136	280913	protein_coding	1		ROBO4
ENSGALG00000009641	-0.969436	14.3824	2.42148	0.119682	0.847651	ENSGALG00000009641	ENSGALG00000009641.7	COL1A2	collagen type I alpha 2 chain [Source:NCBI gene;Acc:396243]	2	23572966	23610978	protein_coding	1		COL1A2
ENSGALG00000004209	-0.701729	3.47293	2.41798	0.119949	0.847918	ENSGALG00000004209	ENSGALG00000004209.6	ELFN1	extracellular leucine rich repeat and fibronectin type III domain containing 1 [Source:NCBI gene;Acc:416465]	14	3139896	3142286	protein_coding	1	ELFN1	ELFN1
ENSGALG00000000836	0.526555	3.02681	2.41723	0.120007	0.847918	ENSGALG00000000836	ENSGALG00000000836.5	RFX5	regulatory factor X5 [Source:HGNC Symbol;Acc:HGNC:9986]	25	313422	315503	protein_coding	-1	RFX5
ENSGALG00000009438	-0.387576	6.53937	2.41668	0.120049	0.847918	ENSGALG00000009438	ENSGALG00000009438.6	SLC39A9	solute carrier family 39 member 9 [Source:NCBI gene;Acc:423261]	5	28215545	28232960	protein_coding	-1		SLC39A9
ENSGALG00000010140	-0.373106	4.85852	2.41616	0.120089	0.847918	ENSGALG00000010140	ENSGALG00000010140.7	EIF2B3	eukaryotic translation initiation factor 2B subunit gamma [Source:NCBI gene;Acc:424587]	8	21175780	21270007	protein_coding	-1		EIF2B3
ENSGALG00000002099	-0.455868	4.78281	2.41579	0.120117	0.847918	ENSGALG00000002099	ENSGALG00000002099.6		6-phosphofructo-2-kinase/fructose-2,6-biphosphatase 4-like [Source:NCBI gene;Acc:100859653]	12	1786656	1827828	protein_coding	-1		PFKFB4L
ENSGALG00000048159	0.427838	4.08136	2.41554	0.120137	0.847918	ENSGALG00000048159	ENSGALG00000048159.1		taperin [Source:NCBI gene;Acc:417259]	17	2138075	2149550	protein_coding	1		TPRN
ENSGALG00000017246	0.68408	2.86568	2.41269	0.120355	0.848968	ENSGALG00000017246	ENSGALG00000017246.6	ME3	malic enzyme 3 [Source:NCBI gene;Acc:419019]	1	190149703	190268109	protein_coding	1	ME3	ME3
ENSGALG00000013907	0.440985	4.89679	2.41178	0.120426	0.848972	ENSGALG00000013907	ENSGALG00000013907.6	KDR	kinase insert domain receptor [Source:NCBI gene;Acc:395323]	4	65185439	65213106	protein_coding	1		KDR
ENSGALG00000036749	-0.354769	4.62912	2.41032	0.120538	0.849272	ENSGALG00000036749	ENSGALG00000036749.2	MRPS28	mitochondrial ribosomal protein S28 [Source:NCBI gene;Acc:770322]	2	120718609	120796159	protein_coding	-1	MRPS28	MRPS28
ENSGALG00000009598	-0.404674	7.23301	2.40858	0.120672	0.849472	ENSGALG00000009598	ENSGALG00000009598.6	EPRS	glutamyl-prolyl-tRNA synthetase [Source:NCBI gene;Acc:421348]	3	18926218	18963234	protein_coding	1		EPRS
ENSGALG00000003689	-0.560633	7.40779	2.40714	0.120783	0.849472	ENSGALG00000003689	ENSGALG00000003689.6	PAPSS2	3'-phosphoadenosine 5'-phosphosulfate synthase 2 [Source:NCBI gene;Acc:423678]	6	10302749	10312180	protein_coding	-1	PAPSS2	PAPSS2
ENSGALG00000026231	0.575573	2.89691	2.40637	0.120842	0.849472	ENSGALG00000026231	ENSGALG00000026231.3	ARID3A	AT-rich interaction domain 3A [Source:NCBI gene;Acc:100858440]	28	2949235	2970919	protein_coding	1	ARID3A	ARID3A
ENSGALG00000009927	0.438215	6.44224	2.40633	0.120845	0.849472	ENSGALG00000009927	ENSGALG00000009927.5	RAP1B	RAP1B, member of RAS oncogene family [Source:NCBI gene;Acc:417840]	1	35332501	35366120	protein_coding	1		RAP1B
ENSGALG00000038145	-0.441627	6.24656	2.40331	0.121079	0.850623	ENSGALG00000038145	ENSGALG00000038145.3	DPP7	dipeptidyl peptidase 7 [Source:NCBI gene;Acc:417297]	17	672266	692114	protein_coding	1	DPP7	DPP7
ENSGALG00000006053	0.84261	0.902773	2.40116	0.121245	0.850859	ENSGALG00000006053	ENSGALG00000006053.6	SLC2A11	solute carrier family 2 member 11 [Source:NCBI gene;Acc:427704]	15	8308323	8317487	protein_coding	1		SLC2A11
ENSGALG00000033470	-0.419647	4.30035	2.40083	0.121271	0.850859	ENSGALG00000033470	ENSGALG00000033470.2	ADGRA3	adhesion G protein-coupled receptor A3 [Source:NCBI gene;Acc:422817]	4	74457009	74485585	protein_coding	1	ADGRA3	ADGRA3
ENSGALG00000041924	-0.390498	6.64138	2.39916	0.1214	0.850859	ENSGALG00000041924	ENSGALG00000041924.2	PFDN5	prefoldin subunit 5 [Source:NCBI gene;Acc:100859376]	33	7246423	7248726	protein_coding	1	PFDN5	PFDN5
ENSGALG00000037935	0.412867	4.95653	2.39777	0.121508	0.850859	ENSGALG00000037935	ENSGALG00000037935.3	RARA	retinoic acid receptor alpha [Source:NCBI gene;Acc:395213]	27	7217090	7233200	protein_coding	1		RARA
ENSGALG00000013225	-0.635078	3.70083	2.397	0.121568	0.850859	ENSGALG00000013225	ENSGALG00000013225.6	VAT1L	vesicle amine transport 1 like [Source:NCBI gene;Acc:430410]	11	13982142	14025331	protein_coding	1	VAT1L	VAT1L
ENSGALG00000034107	0.766164	1.24601	2.39624	0.121628	0.850859	ENSGALG00000034107	ENSGALG00000034107.3	TRIM63	tripartite motif containing 63 [Source:NCBI gene;Acc:426754]	23	3365953	3371497	protein_coding	1	TRIM63	TRIM63
ENSGALG00000054937	0.724434	0.915471	2.39552	0.121683	0.850859	ENSGALG00000054937	ENSGALG00000054937.1		rho GTPase-activating protein 7-like [Source:NCBI gene;Acc:416169]	13	5478546	5485038	protein_coding	1		LOC416169
ENSGALG00000013846	-0.832196	3.63851	2.39514	0.121713	0.850859	ENSGALG00000013846	ENSGALG00000013846.6	ARFGEF3	ARFGEF family member 3 [Source:NCBI gene;Acc:421681]	3	54492908	54572776	protein_coding	-1	ARFGEF3	ARFGEF3
ENSGALG00000011181	-0.71537	8.72024	2.39478	0.121741	0.850859	ENSGALG00000011181	ENSGALG00000011181.6	FKBP14	FK506 binding protein 14 [Source:NCBI gene;Acc:420636]	2	33912328	33919576	protein_coding	-1	FKBP14	FKBP14
ENSGALG00000030096	-0.654535	10.1685	2.39273	0.1219	0.851337	ENSGALG00000030096	ENSGALG00000030096.2		podoplanin [Source:NCBI gene;Acc:768390]	21	5189649	5204441	protein_coding	-1		PDPN
ENSGALG00000030493	0.774406	0.742096	2.39183	0.121971	0.851337	ENSGALG00000030493	ENSGALG00000030493.3	ENTPD3	ectonucleoside triphosphate diphosphohydrolase 3 [Source:NCBI gene;Acc:428447]	2	41127304	41147533	protein_coding	-1		ENTPD3
ENSGALG00000029066	-0.38637	4.33374	2.39081	0.12205	0.851337	ENSGALG00000029066	ENSGALG00000029066.3		discoidin, CUB and LCCL domain-containing protein 1-like [Source:NCBI gene;Acc:419584]	23	2392658	2412254	protein_coding	1		LOC419584
ENSGALG00000007994	-0.744848	1.11651	2.39032	0.122089	0.851337	ENSGALG00000007994	ENSGALG00000007994.5	PARD6B	par-6 family cell polarity regulator beta [Source:NCBI gene;Acc:419352]	20	13464452	13478200	protein_coding	-1		PARD6B
ENSGALG00000000438	0.55866	2.62981	2.38751	0.122308	0.85238	ENSGALG00000000438	ENSGALG00000000438.6	ERMP1	endoplasmic reticulum metallopeptidase 1 [Source:NCBI gene;Acc:426644]	Z	27771796	27786843	protein_coding	-1	ERMP1	ERMP1
ENSGALG00000009850	0.423676	4.28341	2.38567	0.122452	0.852499	ENSGALG00000009850	ENSGALG00000009850.7	NOVA1	NOVA alternative splicing regulator 1 [Source:NCBI gene;Acc:423300]	5	33031679	33185933	protein_coding	-1		NOVA1
ENSGALG00000037625	0.742279	2.4392	2.3855	0.122465	0.852499	ENSGALG00000037625	ENSGALG00000037625.3	FBN3	fibrillin 3 [Source:NCBI gene;Acc:395079]	28	367087	488932	protein_coding	1	FBN3	FBN3
ENSGALG00000008301	0.566425	2.61267	2.38403	0.122581	0.852816	ENSGALG00000008301	ENSGALG00000008301.6	FAM185A	family with sequence similarity 185 member A [Source:NCBI gene;Acc:417722]	1	12932861	12973755	protein_coding	1	FAM185A	FAM185A
ENSGALG00000021225	0.577233	2.41393	2.38275	0.122681	0.853027	ENSGALG00000021225	ENSGALG00000021225.5	CDCA9	cell division cycle associated 9 [Source:NCBI gene;Acc:415745]	11	7727755	7733916	protein_coding	-1		CDCA9
ENSGALG00000007171	0.940701	0.616882	2.38063	0.122848	0.853102	ENSGALG00000007171	ENSGALG00000007171.4		class II major histocompatibility complex transactivator [Source:NCBI gene;Acc:416633]	14	9474126	9492269	protein_coding	-1		CIITA
ENSGALG00000048230	0.851966	2.11345	2.3805	0.122858	0.853102	ENSGALG00000048230	ENSGALG00000048230.1			1	72189820	72193984	lncRNA	1
ENSGALG00000038217	-0.461474	6.91178	2.37994	0.122902	0.853102	ENSGALG00000038217	ENSGALG00000038217.2	CD82	CD82 molecule [Source:NCBI gene;Acc:423172]	5	22211473	22245391	protein_coding	1		CD82
ENSGALG00000052223	0.403547	4.64468	2.37729	0.123111	0.853396	ENSGALG00000052223	ENSGALG00000052223.1	YPEL1	yippee like 1 [Source:NCBI gene;Acc:416774]	15	846449	859774	protein_coding	1	YPEL1	YPEL1
ENSGALG00000006350	-0.463515	6.64384	2.37658	0.123167	0.853396	ENSGALG00000006350	ENSGALG00000006350.4	DDTL	D-dopachrome tautomerase-like [Source:NCBI gene;Acc:416937]	15	8408011	8410445	protein_coding	1		DDTL
ENSGALG00000002199	-0.639726	1.52781	2.37649	0.123174	0.853396	ENSGALG00000002199	ENSGALG00000002199.6	KLHL17	kelch like family member 17 [Source:NCBI gene;Acc:419432]	21	2873105	2880012	protein_coding	-1	KLHL17	KLHL17
ENSGALG00000017378	0.67932	5.31677	2.37534	0.123264	0.853396	ENSGALG00000017378	ENSGALG00000017378.5	CRTAC1	cartilage acidic protein 1 [Source:NCBI gene;Acc:425346]	6	23234581	23244586	protein_coding	1		CRTAC1
ENSGALG00000054037	-0.748286	1.00097	2.37474	0.123312	0.853396	ENSGALG00000054037	ENSGALG00000054037.1		N-alpha-acetyltransferase 38, NatC auxiliary subunit-like [Source:NCBI gene;Acc:107054771]	19	50081	51269	protein_coding	-1		LOC107054771
ENSGALG00000014784	-0.479844	5.60869	2.37395	0.123375	0.853396	ENSGALG00000014784	ENSGALG00000014784.6	MAST4	microtubule associated serine/threonine kinase family member 4 [Source:NCBI gene;Acc:427169]	Z	21008217	21296403	protein_coding	1	MAST4	MAST4
ENSGALG00000043787	0.596338	3.02485	2.37253	0.123487	0.853396	ENSGALG00000043787	ENSGALG00000043787.2	DEPDC6	DEP domain containing 6 [Source:NCBI gene;Acc:420357]	2	136698116	136770823	protein_coding	1		DEPDC6
ENSGALG00000003969	-0.404652	6.64859	2.37025	0.123668	0.853396	ENSGALG00000003969	ENSGALG00000003969.7	EMC1	ER membrane protein complex subunit 1 [Source:NCBI gene;Acc:419470]	21	4663917	4673877	protein_coding	-1		EMC1
ENSGALG00000050713	0.631134	2.45824	2.3697	0.123711	0.853396	ENSGALG00000050713	ENSGALG00000050713.1			KZ626835.1	1173558	1183743	lncRNA	1
ENSGALG00000015056	-0.498947	4.87772	2.3691	0.123758	0.853396	ENSGALG00000015056	ENSGALG00000015056.6	LAMA3	laminin subunit alpha 3 [Source:NCBI gene;Acc:428524]	2	103119354	103231680	protein_coding	1	LAMA3	LAMA3
ENSGALG00000004927	-0.382437	4.45937	2.3688	0.123782	0.853396	ENSGALG00000004927	ENSGALG00000004927.7	COQ4	coenzyme Q4 [Source:NCBI gene;Acc:417219]	17	5355051	5360831	protein_coding	-1	COQ4	COQ4
ENSGALG00000040360	0.566727	7.94237	2.36831	0.123821	0.853396	ENSGALG00000040360	ENSGALG00000040360.2	DUSP1	dual specificity phosphatase 1 [Source:NCBI gene;Acc:374192]	13	9770031	9772644	protein_coding	-1		DUSP1
ENSGALG00000013512	0.393082	5.79094	2.36788	0.123855	0.853396	ENSGALG00000013512	ENSGALG00000013512.7		basic transcription factor 3 [Source:NCBI gene;Acc:426154]	Z	24736603	24743170	protein_coding	-1		BTF3
ENSGALG00000009495	-0.424835	6.24946	2.36643	0.12397	0.853704	ENSGALG00000009495	ENSGALG00000009495.7	FGFR2	fibroblast growth factor receptor 2 [Source:NCBI gene;Acc:396259]	6	31834704	31906976	protein_coding	-1		FGFR2
ENSGALG00000036466	-0.384162	5.70701	2.36528	0.124062	0.853855	ENSGALG00000036466	ENSGALG00000036466.2		unconventional myosin-X-like [Source:NCBI gene;Acc:101749223]	2	75520204	75645279	pseudogene	1		LOC101749223
ENSGALG00000017154	0.820671	0.649125	2.36303	0.12424	0.853978	ENSGALG00000017154	ENSGALG00000017154.6	ZC3H12C	zinc finger CCCH-type containing 12C [Source:NCBI gene;Acc:418963]	1	180987196	181008738	protein_coding	-1	ZC3H12C	ZC3H12C
ENSGALG00000053653	0.465447	4.0848	2.36277	0.124261	0.853978	ENSGALG00000053653	ENSGALG00000053653.1	ZNF467	gastrula zinc finger protein XlCGF57.1-like [Source:NCBI gene;Acc:107052491]	2	462928	465096	protein_coding	-1	ZNF467	LOC107052491
ENSGALG00000006033	-0.353536	5.65488	2.36241	0.12429	0.853978	ENSGALG00000006033	ENSGALG00000006033.5	GORASP1	golgi reassembly stacking protein 1 [Source:NCBI gene;Acc:420426]	2	5347137	5353920	protein_coding	1		GORASP1
ENSGALG00000008823	0.750377	0.96262	2.36107	0.124397	0.85423	ENSGALG00000008823	ENSGALG00000008823.6	IQUB	IQ motif and ubiquitin domain containing [Source:NCBI gene;Acc:417754]	1	22456440	22477009	protein_coding	1	IQUB	IQUB
ENSGALG00000010346	-0.489464	7.69175	2.35675	0.124742	0.855825	ENSGALG00000010346	ENSGALG00000010346.7	TGFB3	transforming growth factor beta 3 [Source:NCBI gene;Acc:396438]	5	38669193	38684139	protein_coding	-1		TGFB3
ENSGALG00000010903	0.613147	3.50919	2.3564	0.12477	0.855825	ENSGALG00000010903	ENSGALG00000010903.6	RASGEF1B	RasGEF domain family member 1B [Source:NCBI gene;Acc:100859744]	4	45493922	45604213	protein_coding	1	RASGEF1B	RASGEF1B
ENSGALG00000008582	-0.377618	4.81679	2.35458	0.124916	0.856044	ENSGALG00000008582	ENSGALG00000008582.6	ADAM23	ADAM metallopeptidase domain 23 [Source:NCBI gene;Acc:424099]	7	12447136	12519795	protein_coding	-1		ADAM23
ENSGALG00000016767	-0.476343	5.88295	2.35425	0.124942	0.856044	ENSGALG00000016767	ENSGALG00000016767.6	AFF3	AF4/FMR2 family member 3 [Source:NCBI gene;Acc:418705]	1	133973567	134294259	protein_coding	-1	AFF3	AFF3
ENSGALG00000051297	0.517138	4.59114	2.35208	0.125116	0.856338	ENSGALG00000051297	ENSGALG00000051297.1			1	31439	243537	protein_coding	1
ENSGALG00000005774	0.706214	3.24411	2.35196	0.125126	0.856338	ENSGALG00000005774	ENSGALG00000005774.6	NKAIN4	Na+/K+ transporting ATPase interacting 4 [Source:NCBI gene;Acc:419240]	20	8729917	8777657	protein_coding	-1	NKAIN4	NKAIN4
ENSGALG00000038753	-0.392452	6.03965	2.34986	0.125294	0.857008	ENSGALG00000038753	ENSGALG00000038753.2	SAR1B	secretion associated Ras related GTPase 1B [Source:NCBI gene;Acc:416314]	13	16440102	16452190	protein_coding	1		SAR1B
ENSGALG00000016227	0.765649	3.71842	2.34806	0.125439	0.857516	ENSGALG00000016227	ENSGALG00000016227.5	GPR34	G protein-coupled receptor 34 [Source:NCBI gene;Acc:771199]	1	113198416	113202575	protein_coding	-1		GPR34
ENSGALG00000008385	-0.485112	3.51028	2.34575	0.125625	0.858308	ENSGALG00000008385	ENSGALG00000008385.6	PPIP5K1	diphosphoinositol pentakisphosphate kinase 1 [Source:NCBI gene;Acc:415587]	10	20594970	20635489	protein_coding	1	PPIP5K1	PPIP5K1
ENSGALG00000033854	0.651983	3.60701	2.34185	0.12594	0.859365	ENSGALG00000033854	ENSGALG00000033854.3	CSF1	colony stimulating factor 1 [Source:NCBI gene;Acc:100499189]	26	1287074	1293880	protein_coding	1		CSF1
ENSGALG00000031860	-0.537005	3.2982	2.34171	0.125951	0.859365	ENSGALG00000031860	ENSGALG00000031860.2		alcohol dehydrogenase, iron containing 1 [Source:NCBI gene;Acc:426446]	2	115083826	115099513	protein_coding	1		ADHFE1
ENSGALG00000011894	0.523365	5.32388	2.33995	0.126094	0.859365	ENSGALG00000011894	ENSGALG00000011894.6	CYP2D6	cytochrome P450 family 2 subfamily D member 6 [Source:NCBI gene;Acc:417981]	1	49408394	49417609	protein_coding	1		CYP2D6
ENSGALG00000006564	-0.40059	6.15572	2.33966	0.126117	0.859365	ENSGALG00000006564	ENSGALG00000006564.7		DnaJ heat shock protein family (Hsp40) member B11 [Source:NCBI gene;Acc:424868]	9	4531072	4544764	protein_coding	1		DNAJB11
ENSGALG00000052679	-0.697931	0.779325	2.33927	0.126149	0.859365	ENSGALG00000052679	ENSGALG00000052679.1			1	106317	118568	lncRNA	-1
ENSGALG00000036686	-0.45082	5.54353	2.3386	0.126203	0.859365	ENSGALG00000036686	ENSGALG00000036686.2	PLTP	phospholipid transfer protein [Source:NCBI gene;Acc:428164]	20	10532982	10538372	protein_coding	-1		PLTP
ENSGALG00000008795	-0.606282	3.01756	2.33765	0.12628	0.859409	ENSGALG00000008795	ENSGALG00000008795.5	GPAM	glycerol-3-phosphate acyltransferase, mitochondrial [Source:NCBI gene;Acc:423895]	6	27574464	27600048	protein_coding	-1	GPAM	GPAM
ENSGALG00000007044	-0.350664	4.74101	2.33425	0.126556	0.860424	ENSGALG00000007044	ENSGALG00000007044.6	METTL9	methyltransferase like 9 [Source:NCBI gene;Acc:416623]	14	9132050	9150359	protein_coding	1		METTL9
ENSGALG00000014486	0.363364	4.34585	2.33301	0.126657	0.860424	ENSGALG00000014486	ENSGALG00000014486.7	TAPT1	transmembrane anterior posterior transformation 1 [Source:NCBI gene;Acc:422824]	4	76442333	76481335	protein_coding	1		TAPT1
ENSGALG00000006682	0.393947	4.4977	2.33284	0.126671	0.860424	ENSGALG00000006682	ENSGALG00000006682.6	BEND7	BEN domain containing 7 [Source:NCBI gene;Acc:419037]	1	7324436	7372660	protein_coding	-1		BEND7
ENSGALG00000008257	0.461253	4.83758	2.33234	0.126712	0.860424	ENSGALG00000008257	ENSGALG00000008257.6	MERTK	MER proto-oncogene, tyrosine kinase [Source:NCBI gene;Acc:395836]	3	3201470	3222450	protein_coding	1		MERTK
ENSGALG00000015656	-0.429829	5.81106	2.3304	0.12687	0.860985	ENSGALG00000015656	ENSGALG00000015656.6	PALM2AKAP2	PALM2-AKAP2 fusion [Source:NCBI gene;Acc:100533110]	Z	65797112	66041637	protein_coding	1		PALM2AKAP2
ENSGALG00000028135	-0.367946	4.50676	2.32873	0.127006	0.860985	ENSGALG00000028135	ENSGALG00000028135.3			Z	56523389	56533199	protein_coding	-1
ENSGALG00000034044	0.411834	4.6257	2.32872	0.127006	0.860985	ENSGALG00000034044	ENSGALG00000034044.2	TBC1D12	TBC1 domain family member 12 [Source:NCBI gene;Acc:768541]	6	21022888	21057755	protein_coding	1	TBC1D12	TBC1D12
ENSGALG00000017208	-0.392885	5.10622	2.32723	0.127128	0.861332	ENSGALG00000017208	ENSGALG00000017208.6	AMOTL1	angiomotin like 1 [Source:NCBI gene;Acc:428091]	1	186814876	186872104	protein_coding	-1	AMOTL1	AMOTL1
ENSGALG00000011596	-0.377669	4.22887	2.32439	0.12736	0.862243	ENSGALG00000011596	ENSGALG00000011596.6	PTPN4	protein tyrosine phosphatase, non-receptor type 4 [Source:NCBI gene;Acc:424234]	7	25353898	25421281	protein_coding	1	PTPN4	PTPN4
ENSGALG00000003378	-0.566477	2.23133	2.32385	0.127404	0.862243	ENSGALG00000003378	ENSGALG00000003378.6			14	1349084	1352298	protein_coding	-1
ENSGALG00000015303	-0.582656	1.80377	2.32109	0.12763	0.863294	ENSGALG00000015303	ENSGALG00000015303.6	AFG1L	lactation elevated 1 [Source:NCBI gene;Acc:421770]	3	67391076	67462006	protein_coding	-1	AFG1L	LACE1
ENSGALG00000014999	1.22101	1.42251	2.31784	0.127897	0.864619	ENSGALG00000014999	ENSGALG00000014999.8	MAP1B	microtubule associated protein 1B [Source:NCBI gene;Acc:396174]	Z	25324362	25392656	protein_coding	-1	MAP1B	MAP1B
ENSGALG00000041898	0.507044	4.39961	2.31656	0.128003	0.864851	ENSGALG00000041898	ENSGALG00000041898.2	FAM43A	family with sequence similarity 43 member A [Source:NCBI gene;Acc:429145]	9	12971183	12972271	protein_coding	-1	FAM43A	FAM43A
ENSGALG00000033938	0.421909	4.03591	2.31412	0.128203	0.865407	ENSGALG00000033938	ENSGALG00000033938.3	ARHGAP26	Rho GTPase activating protein 26 [Source:NCBI gene;Acc:396113]	13	17989659	18090319	protein_coding	1		ARHGAP26
ENSGALG00000038748	0.476342	7.95363	2.31384	0.128227	0.865407	ENSGALG00000038748	ENSGALG00000038748.2	RSRP1	arginine and serine rich protein 1 [Source:NCBI gene;Acc:419592]	23	2551024	2555961	protein_coding	1	RSRP1	RSRP1
ENSGALG00000015299	-0.379116	6.26425	2.31284	0.12831	0.865487	ENSGALG00000015299	ENSGALG00000015299.7	TFG	TRK-fused gene [Source:NCBI gene;Acc:418391]	1	86088878	86107419	protein_coding	1	TFG	TFG
ENSGALG00000042984	-0.41841	4.808	2.30908	0.12862	0.866621	ENSGALG00000042984	ENSGALG00000042984.3		aminoacylase 1 [Source:NCBI gene;Acc:100858836]	12	3535461	3540337	protein_coding	-1		ACY1
ENSGALG00000011528	0.399204	4.70364	2.30908	0.12862	0.866621	ENSGALG00000011528	ENSGALG00000011528.7		kinesin light chain 1 [Source:NCBI gene;Acc:423484]	5	50621149	50662604	protein_coding	1		KLC1
ENSGALG00000052327	0.944879	1.59785	2.3081	0.128701	0.866686	ENSGALG00000052327	ENSGALG00000052327.1			1	65444381	65524729	lncRNA	1
ENSGALG00000035960	0.70077	2.39271	2.30696	0.128796	0.866797	ENSGALG00000035960	ENSGALG00000035960.2		myosin-7-like 2 [Source:NCBI gene;Acc:429272]	KZ626838.1	225080	242676	protein_coding	1		MYO7L2
ENSGALG00000015665	0.641071	2.52206	2.30603	0.128873	0.866797	ENSGALG00000015665	ENSGALG00000015665.2	SH3BP2	SH3 domain binding protein 2 [Source:NCBI gene;Acc:422883]	4	82359242	82394778	protein_coding	-1		SH3BP2
ENSGALG00000051992	0.634051	2.50294	2.30397	0.129044	0.866797	ENSGALG00000051992	ENSGALG00000051992.1	CYP2J23	cytochrome P450, family 2, subfamily J, polypeptide 23 [Source:NCBI gene;Acc:424676]	8	27026464	27032368	protein_coding	-1		CYP2J23
ENSGALG00000009422	0.409023	5.53787	2.30348	0.129085	0.866797	ENSGALG00000009422	ENSGALG00000009422.6	RGS10	regulator of G-protein signaling 10 [Source:NCBI gene;Acc:423930]	6	31170655	31187619	protein_coding	-1	RGS10	RGS10
ENSGALG00000055081	0.390864	4.81644	2.30043	0.129338	0.866797	ENSGALG00000055081	ENSGALG00000055081.1	SEMA4C	semaphorin-4C-like [Source:NCBI gene;Acc:107049953]	22	3717776	3727404	protein_coding	1	SEMA4C	LOC107049953
ENSGALG00000002124	-0.478698	4.78113	2.29998	0.129376	0.866797	ENSGALG00000002124	ENSGALG00000002124.5	ZDHHC8	zinc finger DHHC-type containing 8 [Source:NCBI gene;Acc:416788]	15	1614684	1697331	protein_coding	1		ZDHHC8
ENSGALG00000032563	0.332264	4.93443	2.29982	0.129389	0.866797	ENSGALG00000032563	ENSGALG00000032563.2	FBXO34	F-box protein 34 [Source:NCBI gene;Acc:423554]	5	56391533	56427632	protein_coding	-1		FBXO34
ENSGALG00000011058	-0.774944	5.90703	2.29964	0.129404	0.866797	ENSGALG00000011058	ENSGALG00000011058.6	LEPR	leptin receptor [Source:NCBI gene;Acc:374223]	8	28687054	28717255	protein_coding	1		LEPR
ENSGALG00000053321	0.668254	1.05213	2.29912	0.129447	0.866797	ENSGALG00000053321	ENSGALG00000053321.1	DOK2	docking protein 2 [Source:NCBI gene;Acc:100857332]	22	1692013	1697453	protein_coding	1	DOK2	DOK2
ENSGALG00000003670	0.374081	5.47137	2.29825	0.129519	0.866797	ENSGALG00000003670	ENSGALG00000003670.7	MAFB	MAF bZIP transcription factor B [Source:NCBI gene;Acc:419173]	20	4690689	4693338	protein_coding	-1		MAFB
ENSGALG00000005923	0.809218	1.19585	2.29803	0.129538	0.866797	ENSGALG00000005923	ENSGALG00000005923.4	NPY4R	neuropeptide Y receptor Y4 [Source:NCBI gene;Acc:428955]	6	18684046	18690552	protein_coding	1		NPY4R
ENSGALG00000000544	0.66519	0.692	2.29763	0.129571	0.866797	ENSGALG00000000544	ENSGALG00000000544.6		RAB44, member RAS oncogene family [Source:NCBI gene;Acc:100859805]	26	1603818	1616373	protein_coding	1		RAB44
ENSGALG00000050374	0.355892	5.85518	2.29579	0.129725	0.866986	ENSGALG00000050374	ENSGALG00000050374.1			21	4596244	4611544	protein_coding	-1
ENSGALG00000016823	0.379159	4.88488	2.29559	0.129742	0.866986	ENSGALG00000016823	ENSGALG00000016823.6	TFDP1	transcription factor Dp family member 3 [Source:NCBI gene;Acc:418739]	1	138648967	138690320	protein_coding	-1	TFDP1	TFDP3
ENSGALG00000006250	-0.375547	4.56098	2.29257	0.129995	0.867915	ENSGALG00000006250	ENSGALG00000006250.7	TRAPPC2L	trafficking protein particle complex 2 like [Source:NCBI gene;Acc:415847]	11	18514747	18518136	protein_coding	1	TRAPPC2L	TRAPPC2L
ENSGALG00000010150	-0.422995	7.56468	2.29222	0.130023	0.867915	ENSGALG00000010150	ENSGALG00000010150.6	SEC23A	Sec23 homolog A, coat complex II component [Source:NCBI gene;Acc:423335]	5	37773303	37799068	protein_coding	-1	SEC23A	SEC23A
ENSGALG00000010953	0.464679	4.97278	2.29081	0.130142	0.868231	ENSGALG00000010953	ENSGALG00000010953.6	KANK4	KN motif and ankyrin repeat domains 4 [Source:NCBI gene;Acc:424684]	8	27815241	27824970	protein_coding	-1	KANK4	KANK4
ENSGALG00000028466	0.677639	5.40067	2.28928	0.13027	0.868547	ENSGALG00000028466	ENSGALG00000028466.3		interleukin 34 [Source:NCBI gene;Acc:100858424]	11	1717174	1721502	protein_coding	-1		IL34
ENSGALG00000005595	0.560573	2.68536	2.28855	0.130332	0.868547	ENSGALG00000005595	ENSGALG00000005595.7	HPS4	HPS4, biogenesis of lysosomal organelles complex 3 subunit 2 [Source:NCBI gene;Acc:416907]	15	7434521	7445818	protein_coding	-1	HPS4	HPS4
ENSGALG00000011184	0.359252	5.44234	2.28706	0.130456	0.868564	ENSGALG00000011184	ENSGALG00000011184.7	HNRNPD	heterogeneous nuclear ribonucleoprotein D [Source:NCBI gene;Acc:422602]	4	46406249	46416007	protein_coding	1		HNRNPD
ENSGALG00000001938	0.405419	5.24209	2.28682	0.130477	0.868564	ENSGALG00000001938	ENSGALG00000001938.6	SLC25A24	solute carrier family 25 member 24 [Source:NCBI gene;Acc:424337]	8	1583595	1606906	protein_coding	-1	SLC25A24	SLC25A24
ENSGALG00000030673	-0.473618	8.16356	2.28496	0.130634	0.868751	ENSGALG00000030673	ENSGALG00000030673.2			5	50224769	50242138	protein_coding	1
ENSGALG00000052168	-0.723786	1.11159	2.28479	0.130648	0.868751	ENSGALG00000052168	ENSGALG00000052168.1		cyclin-dependent kinase 16-like [Source:NCBI gene;Acc:112530990]	30	311413	329492	protein_coding	-1		LOC112530990
ENSGALG00000047276	0.648775	1.82022	2.28307	0.130792	0.869238	ENSGALG00000047276	ENSGALG00000047276.1			31	2862166	2871384	lncRNA	1
ENSGALG00000033570	-0.580916	5.98407	2.28148	0.130927	0.869656	ENSGALG00000033570	ENSGALG00000033570.2		coiled-coil domain containing 15 [Source:NCBI gene;Acc:419705]	24	252913	269196	protein_coding	-1		CCDC15
ENSGALG00000046826	-0.367287	4.79473	2.2803	0.131027	0.869845	ENSGALG00000046826	ENSGALG00000046826.1	GYS1	glycogen [starch] synthase, muscle-like [Source:NCBI gene;Acc:107050456]	33	6710500	6728373	protein_coding	-1	GYS1	LOC107050456
ENSGALG00000037112	0.699274	0.304156	2.27821	0.131203	0.870543	ENSGALG00000037112	ENSGALG00000037112.2			2	49812139	49826641	protein_coding	-1
ENSGALG00000035879	0.456189	3.4893	2.27279	0.131663	0.873116	ENSGALG00000035879	ENSGALG00000035879.2	ITGA7	integrin subunit alpha 7 [Source:NCBI gene;Acc:101749098]	33	5470014	5483465	protein_coding	-1	ITGA7	ITGA7
ENSGALG00000014336	0.36787	4.94216	2.2703	0.131875	0.874035	ENSGALG00000014336	ENSGALG00000014336.5	RELL1	RELT like 1 [Source:NCBI gene;Acc:422795]	4	69834800	69855846	protein_coding	1		RELL1
ENSGALG00000049638	-0.40844	4.99166	2.26947	0.131945	0.874035	ENSGALG00000049638	ENSGALG00000049638.1	GATD1	glutamine amidotransferase like class 1 domain containing 1 [Source:HGNC Symbol;Acc:HGNC:26616]	5	685751	720725	protein_coding	-1	GATD1
ENSGALG00000009222	-0.467971	7.5504	2.2666	0.13219	0.875183	ENSGALG00000009222	ENSGALG00000009222.6	FNDC3B	fibronectin type III domain containing 3B [Source:NCBI gene;Acc:424984]	9	19471769	19619406	protein_coding	-1		FNDC3B
ENSGALG00000050015	-0.51543	3.16647	2.26547	0.132286	0.875243	ENSGALG00000050015	ENSGALG00000050015.1			30	1702698	1710557	lncRNA	-1
ENSGALG00000048069	-0.42332	3.64927	2.26481	0.132343	0.875243	ENSGALG00000048069	ENSGALG00000048069.1	LIX1L	limb and CNS expressed 1 like [Source:HGNC Symbol;Acc:HGNC:28715]	25	1967612	1978478	protein_coding	1	LIX1L
ENSGALG00000033919	0.569264	2.685	2.26257	0.132534	0.875922	ENSGALG00000033919	ENSGALG00000033919.2		SH3 and multiple ankyrin repeat domains 3 [Source:NCBI gene;Acc:101748950]	1	458409	703182	pseudogene	1		SHANK3
ENSGALG00000023937	0.369385	4.17146	2.26193	0.132589	0.875922	ENSGALG00000023937	ENSGALG00000023937.4	CMC4	C-X9-C motif containing 4 [Source:NCBI gene;Acc:107049048]	4	2176683	2182464	protein_coding	-1	CMC4	CMC4
ENSGALG00000029571	0.398293	4.18061	2.25859	0.132875	0.87672	ENSGALG00000029571	ENSGALG00000029571.3	TMEM55A	transmembrane protein 55A [Source:NCBI gene;Acc:420221]	2	124638608	124662069	protein_coding	-1		TMEM55A
ENSGALG00000015196	0.694479	0.656808	2.256	0.133097	0.87672	ENSGALG00000015196	ENSGALG00000015196.7	ASXL3	additional sex combs like 3, transcriptional regulator [Source:NCBI gene;Acc:421102]	2	106885853	107013873	protein_coding	1	ASXL3	ASXL3
ENSGALG00000033137	-0.363095	4.34672	2.25503	0.133181	0.87672	ENSGALG00000033137	ENSGALG00000033137.3	TLDC1	TBC/LysM-associated domain containing 1 [Source:NCBI gene;Acc:415815]	11	16763730	16776095	protein_coding	-1		TLDC1
ENSGALG00000007268	0.669102	1.04182	2.25489	0.133193	0.87672	ENSGALG00000007268	ENSGALG00000007268.6		calcium dependent secretion activator [Source:NCBI gene;Acc:416075]	12	13553845	13726591	protein_coding	-1		CADPS
ENSGALG00000002827	-0.322192	4.93805	2.25483	0.133198	0.87672	ENSGALG00000002827	ENSGALG00000002827.5	GPS1	G protein pathway suppressor 1 [Source:NCBI gene;Acc:417382]	18	4966111	4976221	protein_coding	-1		GPS1
ENSGALG00000039327	0.446895	3.75469	2.25392	0.133276	0.87672	ENSGALG00000039327	ENSGALG00000039327.2	VAV3	vav 3 guanine nucleotide exchange factor [Source:NCBI gene;Acc:373939]	8	1386094	1534129	protein_coding	-1		VAV3
ENSGALG00000037726	0.587965	3.46097	2.25375	0.133291	0.87672	ENSGALG00000037726	ENSGALG00000037726.2	MARCKS	myristoylated alanine rich protein kinase C substrate [Source:NCBI gene;Acc:396473]	3	64899435	64901566	protein_coding	-1		MARCKS
ENSGALG00000053991	-0.429738	7.46619	2.25235	0.133411	0.87672	ENSGALG00000053991	ENSGALG00000053991.1		small EDRK-rich factor 2 [Source:NCBI gene;Acc:107054222]	10	20570775	20571216	protein_coding	-1		SERF2
ENSGALG00000026005	-0.480011	6.27776	2.25144	0.13349	0.87672	ENSGALG00000026005	ENSGALG00000026005.3	DIO2	deiodinase, iodothyronine type II [Source:NCBI gene;Acc:373903]	5	40752235	40769122	protein_coding	-1		DIO2
ENSGALG00000012357	0.716753	2.72598	2.25139	0.133494	0.87672	ENSGALG00000012357	ENSGALG00000012357.5	CXCR4	C-X-C motif chemokine receptor 4 [Source:NCBI gene;Acc:395324]	7	30761616	30764299	protein_coding	-1		CXCR4
ENSGALG00000012111	0.724605	2.74327	2.25131	0.133502	0.87672	ENSGALG00000012111	ENSGALG00000012111.6	TMEM37	transmembrane protein 37 [Source:NCBI gene;Acc:770956]	7	28370913	28374010	protein_coding	-1	TMEM37	TMEM37
ENSGALG00000017234	0.507651	3.33832	2.24507	0.134041	0.878985	ENSGALG00000017234	ENSGALG00000017234.7	FOLH1	folate hydrolase 1 [Source:NCBI gene;Acc:419011]	1	188927712	188953081	protein_coding	-1	FOLH1	FOLH1
ENSGALG00000050075	-0.418144	3.94092	2.24475	0.134068	0.878985	ENSGALG00000050075	ENSGALG00000050075.1	TMEM35A	transmembrane protein 35A [Source:NCBI gene;Acc:422194]	4	2097010	2101283	protein_coding	-1	TMEM35A	TMEM35A
ENSGALG00000044391	-0.60004	3.7114	2.24427	0.13411	0.878985	ENSGALG00000044391	ENSGALG00000044391.2	RBM11	RNA binding motif protein 11 [Source:NCBI gene;Acc:418467]	1	99412225	99420340	protein_coding	1	RBM11	RBM11
ENSGALG00000006872	0.337432	4.51698	2.24398	0.134135	0.878985	ENSGALG00000006872	ENSGALG00000006872.6	PISD	phosphatidylserine decarboxylase [Source:NCBI gene;Acc:416960]	15	9214524	9238681	protein_coding	1	PISD	PISD
ENSGALG00000013830	-0.620953	2.26226	2.24163	0.134339	0.87985	ENSGALG00000013830	ENSGALG00000013830.5	PRELID3A	PRELI domain containing 3A [Source:NCBI gene;Acc:421035]	2	97199690	97210085	protein_coding	-1		PRELID3A
ENSGALG00000054304	-0.413614	4.99821	2.2349	0.134926	0.882642	ENSGALG00000054304	ENSGALG00000054304.1			5	732831	758616	protein_coding	-1
ENSGALG00000007493	-0.510548	3.88704	2.2348	0.134934	0.882642	ENSGALG00000007493	ENSGALG00000007493.7	NSDHL	NAD(P) dependent steroid dehydrogenase-like [Source:NCBI gene;Acc:422302]	4	11273078	11283634	protein_coding	-1	NSDHL	NSDHL
[truncated: 10,320 more rows]

## Sheet: Table_S3
Table S3. Expressed and DE genes between normal and FHS-affected broilers with 35 days of age in the GP.
[truncated: 12,633 more rows]

## Sheet: Table_S4
Table S4. Main Biological process involved with FHS considering the DE genes exclusive in the articular cartilage using the DAVID database.
[truncated: 40 more rows]

[truncated: 5 more sheets: Table_S5, Table_S6, Table_S7, Table_S8, Table_S9]
